# Supplementary material for: Target protein identification in live cells and organisms with a non-diffusive proximity tagging system
Source: eLife. 2024 Dec 27;13:RP102667. doi: 10.7554/eLife.102667 (PMC11677243; doi:10.7554/eLife.102667)
Supplement: Figure 5—source data 1. [file elife-102667-fig5-data1.xlsx]

## Sheet: DH5 proteomics
Protein IDs	Majority protein IDs	Peptide counts (all)	Peptide counts (razor+unique)	Peptide counts (unique)	Protein names	Gene names	Fasta headers	Number of proteins	Peptides	Razor + unique peptides	Unique peptides	Peptides DASA_1	Peptides DASA_2	Peptides DASA_3	Peptides DH5_1	Peptides DH5_2	Peptides DH5_3	Razor + unique peptides DASA_1	Razor + unique peptides DASA_2	Razor + unique peptides DASA_3	Razor + unique peptides DH5_1	Razor + unique peptides DH5_2	Razor + unique peptides DH5_3	Unique peptides DASA_1	Unique peptides DASA_2	Unique peptides DASA_3	Unique peptides DH5_1	Unique peptides DH5_2	Unique peptides DH5_3	Sequence coverage [%]	Unique + razor sequence coverage [%]	Unique sequence coverage [%]	Mol. weight [kDa]	Sequence length	Sequence lengths	Q-value	Score	Identification type DASA_1	Identification type DASA_2	Identification type DASA_3	Identification type DH5_1	Identification type DH5_2	Identification type DH5_3	Sequence coverage DASA_1 [%]	Sequence coverage DASA_2 [%]	Sequence coverage DASA_3 [%]	Sequence coverage DH5_1 [%]	Sequence coverage DH5_2 [%]	Sequence coverage DH5_3 [%]
Q6PD74	Q6PD74	1	1	1	Alpha- and gamma-adaptin-binding protein p34	AAGAB	sp|Q6PD74|AAGAB_HUMAN Alpha- and gamma-adaptin-binding protein p34 OS=Homo sapiens OX=9606 GN=AAGAB PE=1 SV=1	1	1	1	1	0	0	1	0	0	1	0	0	1	0	0	1	0	0	1	0	0	1	4.4	4.4	4.4	34.593	315	315	0.00045998	1.9312			By MS/MS			By MS/MS	0	0	4.4	0	0	4.4
A0A096LP25;Q6ZSR9	A0A096LP25;Q6ZSR9	1;1	1;1	1;1	Uncharacterized protein FLJ45252	AAK1	tr|A0A096LP25|A0A096LP25_HUMAN AP2-associated protein kinase 1 OS=Homo sapiens OX=9606 GN=AAK1 PE=1 SV=2;sp|Q6ZSR9|YJ005_HUMAN Uncharacterized protein FLJ45252 OS=Homo sapiens OX=9606 PE=2 SV=2	2	1	1	1	0	0	1	0	0	1	0	0	1	0	0	1	0	0	1	0	0	1	1.5	1.5	1.5	125.88	1163	1163;355	0.00048379	2.3606			By MS/MS			By MS/MS	0	0	1.5	0	0	1.5
E9PIQ4;E9PNP3;E9PR47;Q9H7C9	E9PIQ4;E9PNP3;E9PR47;Q9H7C9	1;1;1;1	1;1;1;1	1;1;1;1	Mth938 domain-containing protein	AAMDC	tr|E9PIQ4|E9PIQ4_HUMAN Mth938 domain-containing protein OS=Homo sapiens OX=9606 GN=AAMDC PE=1 SV=1;tr|E9PNP3|E9PNP3_HUMAN Mth938 domain-containing protein OS=Homo sapiens OX=9606 GN=AAMDC PE=1 SV=1;tr|E9PR47|E9PR47_HUMAN Mth938 domain-containing protein OS	4	1	1	1	0	0	0	0	0	0	0	0	0	0	0	0	0	0	0	0	0	0	22.2	22.2	22.2	9.9902	90	90;141;168;122	1	-2							0	0	0	0	0	0
A0A7P0T8J7;A2A2Q9;A0A7P0TA70;Q9Y312	A0A7P0T8J7;A2A2Q9;A0A7P0TA70;Q9Y312	3;3;3;3	3;3;3;3	3;3;3;3	Protein AAR2 homolog	AAR2	tr|A0A7P0T8J7|A0A7P0T8J7_HUMAN Protein AAR2 homolog OS=Homo sapiens OX=9606 GN=AAR2 PE=4 SV=1;tr|A2A2Q9|A2A2Q9_HUMAN AAR2 splicing factor homolog OS=Homo sapiens OX=9606 GN=AAR2 PE=1 SV=1;tr|A0A7P0TA70|A0A7P0TA70_HUMAN Protein AAR2 homolog OS=Homo sapiens	4	3	3	3	0	1	2	1	1	2	0	1	2	1	1	2	0	1	2	1	1	2	15.5	15.5	15.5	37.375	329	329;398;445;384	0	17.551		By MS/MS	By MS/MS	By matching	By MS/MS	By MS/MS	0	4.6	10.9	4.6	4.6	10.9
A0A6Q8PGI8;A0A6Q8PG62;A0A6Q8PGN5;A0A6Q8PFY2;A0A6Q8PF33;A0A6Q8PGE8;A0A6Q8PGR9;A0A6Q8PGB5;A0A6Q8PHJ2;A0A6Q8PFK3;A0A6Q8PH44;A0A6Q8PHP7;A0A6Q8PHP3;A0A6Q8PF77;A0A6Q8PG28;H3BPK7;P49588	A0A6Q8PGI8;A0A6Q8PG62;A0A6Q8PGN5;A0A6Q8PFY2;A0A6Q8PF33;A0A6Q8PGE8;A0A6Q8PGR9;A0A6Q8PGB5;A0A6Q8PHJ2;A0A6Q8PFK3;A0A6Q8PH44;A0A6Q8PHP7;A0A6Q8PHP3;A0A6Q8PF77;A0A6Q8PG28;H3BPK7;P49588	1;1;1;1;1;1;1;1;1;1;1;1;1;1;1;1;1	1;1;1;1;1;1;1;1;1;1;1;1;1;1;1;1;1	1;1;1;1;1;1;1;1;1;1;1;1;1;1;1;1;1	Alanine--tRNA ligase, cytoplasmic	AARS	tr|A0A6Q8PGI8|A0A6Q8PGI8_HUMAN Alanine--tRNA ligase, cytoplasmic OS=Homo sapiens OX=9606 GN=AARS1 PE=1 SV=1;tr|A0A6Q8PG62|A0A6Q8PG62_HUMAN Alanine--tRNA ligase, cytoplasmic OS=Homo sapiens OX=9606 GN=AARS1 PE=1 SV=1;tr|A0A6Q8PGN5|A0A6Q8PGN5_HUMAN Alanine--	17	1	1	1	0	0	0	0	0	0	0	0	0	0	0	0	0	0	0	0	0	0	5.8	5.8	5.8	31.063	275	275;278;984;977;961;959;940;925;789;772;734;560;535;521;327;999;968	0.00045558	1.8737							0	0	0	0	0	0
A0A3B3ITW3;P28288	A0A3B3ITW3;P28288	2;2	2;2	2;2	ATP-binding cassette sub-family D member 3	ABCD3	tr|A0A3B3ITW3|A0A3B3ITW3_HUMAN ATP-binding cassette sub-family D member 3 OS=Homo sapiens OX=9606 GN=ABCD3 PE=1 SV=2;sp|P28288|ABCD3_HUMAN ATP-binding cassette sub-family D member 3 OS=Homo sapiens OX=9606 GN=ABCD3 PE=1 SV=1	2	2	2	2	0	0	0	0	0	1	0	0	0	0	0	1	0	0	0	0	0	1	3.9	3.9	3.9	75.421	659	659;659	0.00046948	2.0877						By MS/MS	0	0	0	0	0	2.1
Q9UG63;C9JHK9;C9JZV3	Q9UG63;C9JHK9;C9JZV3	3;2;2	3;2;2	3;2;2	ATP-binding cassette sub-family F member 2	ABCF2	sp|Q9UG63|ABCF2_HUMAN ATP-binding cassette sub-family F member 2 OS=Homo sapiens OX=9606 GN=ABCF2 PE=1 SV=2;tr|C9JHK9|C9JHK9_HUMAN ATP-binding cassette sub-family F member 2 (Fragment) OS=Homo sapiens OX=9606 GN=ABCF2 PE=1 SV=1;tr|C9JZV3|C9JZV3_HUMAN ATP-b	3	3	3	3	0	1	2	0	1	2	0	1	2	0	1	2	0	1	2	0	1	2	5.9	5.9	5.9	71.289	623	623;240;287	0	3.2935		By MS/MS	By MS/MS		By MS/MS	By MS/MS	0	2.4	3.5	0	2.4	3.5
E7EW77;E7EP65;A0A0C4DG21;A0A7D9NKC8;F8WAL6;Q9NYB9;E9PEZ7;F8WBL5;A0A0A0MQU9;F8WEB9;H7C3Q7;E7EUA1;F8WAU3;F8WCD7;F8WAZ8;H0Y6B5	E7EW77;E7EP65;A0A0C4DG21;A0A7D9NKC8;F8WAL6;Q9NYB9;E9PEZ7	6;6;6;6;6;6;5;2;2;2;2;1;1;1;1;1	5;5;5;5;5;5;4;2;2;2;2;1;1;1;1;1	5;5;5;5;5;5;4;2;2;2;2;1;1;1;1;1	Abl interactor 2	ABI2	tr|E7EW77|E7EW77_HUMAN Abl interactor 2 OS=Homo sapiens OX=9606 GN=ABI2 PE=1 SV=1;tr|E7EP65|E7EP65_HUMAN Abl interactor 2 (Fragment) OS=Homo sapiens OX=9606 GN=ABI2 PE=1 SV=1;tr|A0A0C4DG21|A0A0C4DG21_HUMAN Abl interactor 2 OS=Homo sapiens OX=9606 GN=ABI2 P	16	6	5	5	1	1	3	0	1	2	1	1	3	0	1	2	1	1	3	0	1	2	17.7	15.8	15.8	52.789	480	480;486;507;513;542;513;458;87;104;108;201;44;53;59;75;293	0	8.0499	By MS/MS	By MS/MS	By MS/MS		By MS/MS	By MS/MS	2.3	2.3	9	0	2.3	4.8
P00519	P00519	3	2	2	Tyrosine-protein kinase ABL1	ABL1	sp|P00519|ABL1_HUMAN Tyrosine-protein kinase ABL1 OS=Homo sapiens OX=9606 GN=ABL1 PE=1 SV=4	1	3	2	2	0	0	0	2	1	2	0	0	0	2	1	1	0	0	0	2	1	1	2.4	1.5	1.5	122.87	1130	1130	0.0004583	1.9077				By MS/MS	By MS/MS	By MS/MS	0	0	0	1.5	1.5	2.2
P42684	P42684	5	5	4	Abelson tyrosine-protein kinase 2	ABL2	sp|P42684|ABL2_HUMAN Tyrosine-protein kinase ABL2 OS=Homo sapiens OX=9606 GN=ABL2 PE=1 SV=1	1	5	5	4	0	0	0	1	1	5	0	0	0	1	1	5	0	0	0	1	1	4	8.8	8.8	8	128.34	1182	1182	0	40.036				By MS/MS	By MS/MS	By MS/MS	0	0	0	1.1	1.1	8.8
Q9ULW3	Q9ULW3	2	2	2	Activator of basal transcription 1	ABT1	sp|Q9ULW3|ABT1_HUMAN Activator of basal transcription 1 OS=Homo sapiens OX=9606 GN=ABT1 PE=1 SV=1	1	2	2	2	0	0	0	0	0	2	0	0	0	0	0	2	0	0	0	0	0	2	14	14	14	31.079	272	272	0	2.928						By MS/MS	0	0	0	0	0	14
A0A7P0TAB2;A0A7P0TBD1;A0A7P0T8J9;A0A7P0TA63;A0A7P0TB55;A0A7P0T8G6;A0A7P0TB51;A0A7P0T932;F6YB23;Q5T4U5;P11310	A0A7P0TAB2;A0A7P0TBD1;A0A7P0T8J9;A0A7P0TA63;A0A7P0TB55;A0A7P0T8G6;A0A7P0TB51;A0A7P0T932;F6YB23;Q5T4U5;P11310	1;1;1;1;1;1;1;1;1;1;1	1;1;1;1;1;1;1;1;1;1;1	1;1;1;1;1;1;1;1;1;1;1	Medium-chain specific acyl-CoA dehydrogenase, mitochondrial	ACADM	tr|A0A7P0TAB2|A0A7P0TAB2_HUMAN Medium-chain-specific acyl-CoA dehydrogenase, mitochondrial OS=Homo sapiens OX=9606 GN=ACADM PE=4 SV=1;tr|A0A7P0TBD1|A0A7P0TBD1_HUMAN Medium-chain-specific acyl-CoA dehydrogenase, mitochondrial OS=Homo sapiens OX=9606 GN=ACAD	11	1	1	1	0	0	0	0	0	0	0	0	0	0	0	0	0	0	0	0	0	0	5.5	5.5	5.5	22.016	199	199;200;201;236;275;335;342;374;389;454;421	1	-2							0	0	0	0	0	0
A0A5F9ZHL1;P24752;A0A5F9ZHD4;A0A5F9ZHJ7;A0A5F9ZI66;A0A5F9ZHJ0;A0A5F9ZHL7;E9PRQ6;A0A5F9ZHH9	A0A5F9ZHL1;P24752;A0A5F9ZHD4;A0A5F9ZHJ7;A0A5F9ZI66;A0A5F9ZHJ0	3;3;2;2;2;2;1;1;1	3;3;2;2;2;2;1;1;1	3;3;2;2;2;2;1;1;1	Acetyl-CoA acetyltransferase, mitochondrial	ACAT1	tr|A0A5F9ZHL1|A0A5F9ZHL1_HUMAN Acetyl-CoA acetyltransferase, mitochondrial OS=Homo sapiens OX=9606 GN=ACAT1 PE=1 SV=1;sp|P24752|THIL_HUMAN Acetyl-CoA acetyltransferase, mitochondrial OS=Homo sapiens OX=9606 GN=ACAT1 PE=1 SV=1;tr|A0A5F9ZHD4|A0A5F9ZHD4_HUMAN	9	3	3	3	0	0	1	0	0	2	0	0	1	0	0	2	0	0	1	0	0	2	9.2	9.2	9.2	46.108	434	434;427;306;315;322;337;106;141;197	0	29.073			By MS/MS			By MS/MS	0	0	3	0	0	6.9
Q9BWD1	Q9BWD1	4	4	4	Acetyl-CoA acetyltransferase, cytosolic	ACAT2	sp|Q9BWD1|THIC_HUMAN Acetyl-CoA acetyltransferase, cytosolic OS=Homo sapiens OX=9606 GN=ACAT2 PE=1 SV=2	1	4	4	4	0	0	1	0	1	3	0	0	1	0	1	3	0	0	1	0	1	3	15.6	15.6	15.6	41.35	397	397	0	18.026			By MS/MS		By MS/MS	By MS/MS	0	0	6.8	0	2	12.8
Q9H3P7	Q9H3P7	9	9	9	Golgi resident protein GCP60	ACBD3	sp|Q9H3P7|GCP60_HUMAN Golgi resident protein GCP60 OS=Homo sapiens OX=9606 GN=ACBD3 PE=1 SV=4	1	9	9	9	1	1	5	1	1	6	1	1	5	1	1	6	1	1	5	1	1	6	24.4	24.4	24.4	60.593	528	528	0	323.31	By MS/MS	By MS/MS	By MS/MS	By matching	By MS/MS	By MS/MS	3	3	13.8	3	3	14.6
H0Y8Y5;H0Y8N1;E9PF16;Q96CM8	H0Y8Y5;H0Y8N1;E9PF16;Q96CM8	1;1;1;1	1;1;1;1	1;1;1;1	Acyl-CoA synthetase family member 2, mitochondrial	ACSF2	tr|H0Y8Y5|H0Y8Y5_HUMAN Medium-chain acyl-CoA ligase ACSF2, mitochondrial (Fragment) OS=Homo sapiens OX=9606 GN=ACSF2 PE=4 SV=1;tr|H0Y8N1|H0Y8N1_HUMAN Medium-chain acyl-CoA ligase ACSF2, mitochondrial (Fragment) OS=Homo sapiens OX=9606 GN=ACSF2 PE=1 SV=1;tr	4	1	1	1	0	0	0	0	0	1	0	0	0	0	0	1	0	0	0	0	0	1	10.6	10.6	10.6	9.4918	85	85;104;572;615	1	-2						By MS/MS	0	0	0	0	0	10.6
P68133;P68032;P63267;P62736;A6NL76;F8WB63;B8ZZJ2;C9JFL5;F6UVQ4;F6QUT6	P68133;P68032;P63267;P62736;A6NL76	19;19;17;17;14;7;7;7;7;7	2;2;1;1;2;1;1;1;1;1	2;2;1;1;2;1;1;1;1;1	Actin, alpha skeletal muscle;Actin, alpha cardiac muscle 1;Actin, gamma-enteric smooth muscle;Actin, aortic smooth muscle	ACTA1;ACTC1;ACTG2;ACTA2	sp|P68133|ACTS_HUMAN Actin, alpha skeletal muscle OS=Homo sapiens OX=9606 GN=ACTA1 PE=1 SV=1;sp|P68032|ACTC_HUMAN Actin, alpha cardiac muscle 1 OS=Homo sapiens OX=9606 GN=ACTC1 PE=1 SV=1;sp|P63267|ACTH_HUMAN Actin, gamma-enteric smooth muscle OS=Homo sapie	10	19	2	2	6	4	8	6	8	12	0	0	0	0	0	0	0	0	0	0	0	0	35.3	7.2	7.2	42.051	377	377;377;376;377;254;105;119;144;151;151	0	3.0581	By matching	By matching	By matching	By matching	By matching	By matching	13.3	9.8	19.1	13.5	15.4	27.3
P60709;E7EVS6;A0A2R8Y793;G5E9R0;A0A6Q8PH58;A0A2R8YGF8;C9JUM1;C9JZR7;C9JTX5;A0A6Q8PGD7	P60709;E7EVS6;A0A2R8Y793	29;24;22;9;9;9;8;8;7;2	1;1;1;1;1;1;1;1;1;1	1;1;1;1;1;1;1;1;1;1	Actin, cytoplasmic 1;Actin, cytoplasmic 1, N-terminally processed	ACTB	sp|P60709|ACTB_HUMAN Actin, cytoplasmic 1 OS=Homo sapiens OX=9606 GN=ACTB PE=1 SV=1;tr|E7EVS6|E7EVS6_HUMAN Actin, cytoplasmic 1 OS=Homo sapiens OX=9606 GN=ACTB PE=1 SV=9;tr|A0A2R8Y793|A0A2R8Y793_HUMAN Actin, cytoplasmic 1 (Fragment) OS=Homo sapiens OX=9606	10	29	1	1	8	8	16	9	12	23	0	1	1	1	1	1	0	1	1	1	1	1	68.5	4.5	4.5	41.736	375	375;334;309;125;151;165;96;102;80;40	0	26.669	By matching	By MS/MS	By MS/MS	By matching	By MS/MS	By MS/MS	21.9	26.7	53.1	28.5	33.9	64.8
O96019;C9JQT2;H7C5S0	O96019;C9JQT2;H7C5S0	2;1;1	2;1;1	2;1;1	Actin-like protein 6A	ACTL6A	sp|O96019|ACL6A_HUMAN Actin-like protein 6A OS=Homo sapiens OX=9606 GN=ACTL6A PE=1 SV=1;tr|C9JQT2|C9JQT2_HUMAN Actin-like protein 6A (Fragment) OS=Homo sapiens OX=9606 GN=ACTL6A PE=1 SV=1;tr|H7C5S0|H7C5S0_HUMAN Actin-like protein 6A (Fragment) OS=Homo sapi	3	2	2	2	0	0	2	0	0	2	0	0	2	0	0	2	0	0	2	0	0	2	10.3	10.3	10.3	47.46	429	429;50;161	0	10.45			By MS/MS			By MS/MS	0	0	10.3	0	0	10.3
P35609;A0A494C1A0;A0A494C060	P35609;A0A494C1A0	15;15;2	1;1;1	1;1;1	Alpha-actinin-2	ACTN2	sp|P35609|ACTN2_HUMAN Alpha-actinin-2 OS=Homo sapiens OX=9606 GN=ACTN2 PE=1 SV=1;tr|A0A494C1A0|A0A494C1A0_HUMAN Alpha-actinin-2 (Fragment) OS=Homo sapiens OX=9606 GN=ACTN2 PE=1 SV=1	3	15	1	1	4	5	6	5	6	8	0	0	0	0	0	0	0	0	0	0	0	0	10.7	1.3	1.3	103.85	894	894;858;588	1	-2	By matching	By matching	By matching	By matching	By matching	By matching	4	4	6.6	4	3.9	6.7
R4GMT0;P61163;A0A1B0GVS3;P42025	R4GMT0;P61163;A0A1B0GVS3	4;4;3;1	4;4;3;1	4;4;3;1	Alpha-centractin	ACTR1A	tr|R4GMT0|R4GMT0_HUMAN Alpha-centractin OS=Homo sapiens OX=9606 GN=ACTR1A PE=1 SV=1;sp|P61163|ACTZ_HUMAN Alpha-centractin OS=Homo sapiens OX=9606 GN=ACTR1A PE=1 SV=1;tr|A0A1B0GVS3|A0A1B0GVS3_HUMAN Alpha-centractin OS=Homo sapiens OX=9606 GN=ACTR1A PE=1 SV=	4	4	4	4	0	0	2	0	0	2	0	0	2	0	0	2	0	0	2	0	0	2	15.7	15.7	15.7	37.433	332	332;376;221;376	0	9.9147			By MS/MS			By MS/MS	0	0	8.1	0	0	8.1
Q9GZN1;F8W057;G3V1Y1;F8VP72;F8W043;F8W0Q1;F8VRL1;F8VSD1	Q9GZN1;F8W057;G3V1Y1	7;5;4;3;3;3;3;2	7;5;4;3;3;3;3;2	7;5;4;3;3;3;3;2	Actin-related protein 6	ACTR6	sp|Q9GZN1|ARP6_HUMAN Actin-related protein 6 OS=Homo sapiens OX=9606 GN=ACTR6 PE=1 SV=1;tr|F8W057|F8W057_HUMAN Actin-related protein 6 OS=Homo sapiens OX=9606 GN=ACTR6 PE=1 SV=1;tr|G3V1Y1|G3V1Y1_HUMAN ARP6 actin-related protein 6 homolog (Yeast), isoform C	8	7	7	7	0	0	3	1	0	5	0	0	3	1	0	5	0	0	3	1	0	5	26.8	26.8	26.8	45.81	396	396;376;314;88;127;144;192;294	0	19.535			By MS/MS	By matching		By MS/MS	0	0	6.8	4.3	0	17.9
A0A7P0Z4F9;A0A3B3IRQ9;P55265;A0A3B3ISU1;A0A7P0Z4K3;A0A3B3ISX1;A0A7P0TA14;A0A3B3ITG9	A0A7P0Z4F9;A0A3B3IRQ9;P55265;A0A3B3ISU1;A0A7P0Z4K3;A0A3B3ISX1	5;5;5;4;4;3;1;1	5;5;5;4;4;3;1;1	5;5;5;4;4;3;1;1	Double-stranded RNA-specific adenosine deaminase	ADAR	tr|A0A7P0Z4F9|A0A7P0Z4F9_HUMAN Double-stranded RNA-specific adenosine deaminase OS=Homo sapiens OX=9606 GN=ADAR PE=4 SV=1;tr|A0A3B3IRQ9|A0A3B3IRQ9_HUMAN Double-stranded RNA-specific adenosine deaminase (Fragment) OS=Homo sapiens OX=9606 GN=ADAR PE=1 SV=1;s	8	5	5	5	1	1	2	1	0	2	1	1	2	1	0	2	1	1	2	1	0	2	9.9	9.9	9.9	101.54	912	912;1158;1226;1046;1165;788;263;350	0	15.052	By matching	By MS/MS	By MS/MS	By MS/MS		By MS/MS	2.7	2.7	3.6	2.7	0	3.6
H0Y334;H0YBE5;A0A7P0T963;Q8N7X0	H0Y334;H0YBE5;A0A7P0T963;Q8N7X0	1;1;1;1	1;1;1;1	1;1;1;1	Androglobin	ADGB	tr|H0Y334|H0Y334_HUMAN Androglobin (Fragment) OS=Homo sapiens OX=9606 GN=ADGB PE=1 SV=1;tr|H0YBE5|H0YBE5_HUMAN Androglobin (Fragment) OS=Homo sapiens OX=9606 GN=ADGB PE=1 SV=1;tr|A0A7P0T963|A0A7P0T963_HUMAN Androglobin OS=Homo sapiens OX=9606 GN=ADGB PE=4	4	1	1	1	0	0	0	0	0	0	0	0	0	0	0	0	0	0	0	0	0	0	3.5	3.5	3.5	71.534	625	625;714;1667;1667	1	-2							0	0	0	0	0	0
H3BTH4;H3BN66;H3BRS6;Q9BRR6	H3BTH4;H3BN66;H3BRS6;Q9BRR6	1;1;1;1	1;1;1;1	1;1;1;1	ADP-dependent glucokinase	ADPGK	tr|H3BTH4|H3BTH4_HUMAN ADP-dependent glucokinase (Fragment) OS=Homo sapiens OX=9606 GN=ADPGK PE=1 SV=1;tr|H3BN66|H3BN66_HUMAN ADP-dependent glucokinase OS=Homo sapiens OX=9606 GN=ADPGK PE=1 SV=1;tr|H3BRS6|H3BRS6_HUMAN ADP-dependent glucokinase (Fragment) O	4	1	1	1	0	0	0	0	0	0	0	0	0	0	0	0	0	0	0	0	0	0	26.3	26.3	26.3	6.0661	57	57;113;204;497	0.0052867	1.2136							0	0	0	0	0	0
P30566;A0A7P0Z472;A0A7P0T9A7;A0A096LNY6;A0A1B0GTJ7;A0A096LNY5;A0A1B0GWJ0;A0A7P0T8E4;A0A0A6YY92;A0A1B0GTG9;A0A1B0GWF8;A0A096LP92;A0A096LNY4;A0A096LPA2;A0A096LP72;A0A1W2PRX2;B4DEP1	P30566;A0A7P0Z472;A0A7P0T9A7;A0A096LNY6;A0A1B0GTJ7;A0A096LNY5;A0A1B0GWJ0;A0A7P0T8E4;A0A0A6YY92;A0A1B0GTG9;A0A1B0GWF8;A0A096LP92	5;5;5;5;5;5;5;4;4;4;4;4;2;1;1;1;1	5;5;5;5;5;5;5;4;4;4;4;4;2;1;1;1;1	5;5;5;5;5;5;5;4;4;4;4;4;2;1;1;1;1	Adenylosuccinate lyase	ADSL	sp|P30566|PUR8_HUMAN Adenylosuccinate lyase OS=Homo sapiens OX=9606 GN=ADSL PE=1 SV=2;tr|A0A7P0Z472|A0A7P0Z472_HUMAN Adenylosuccinate lyase OS=Homo sapiens OX=9606 GN=ADSL PE=4 SV=1;tr|A0A7P0T9A7|A0A7P0T9A7_HUMAN Adenylosuccinate lyase OS=Homo sapiens OX=9	17	5	5	5	0	0	3	0	0	3	0	0	3	0	0	3	0	0	3	0	0	3	20	20	20	54.889	484	484;526;513;498;480;381;480;469;498;467;403;273;164;133;149;142;127	0	10.114			By MS/MS			By MS/MS	0	0	11	0	0	11
Q8IUX7	Q8IUX7	1	1	1	Adipocyte enhancer-binding protein 1	AEBP1	sp|Q8IUX7|AEBP1_HUMAN Adipocyte enhancer-binding protein 1 OS=Homo sapiens OX=9606 GN=AEBP1 PE=1 SV=1	1	1	1	1	0	0	0	0	0	0	0	0	0	0	0	0	0	0	0	0	0	0	1.3	1.3	1.3	130.93	1158	1158	1	-2							0	0	0	0	0	0
Q96P47;C9J975;H0Y873	Q96P47;C9J975;H0Y873	2;1;1	2;1;1	2;1;1	Arf-GAP with GTPase, ANK repeat and PH domain-containing protein 3	AGAP3	sp|Q96P47|AGAP3_HUMAN Arf-GAP with GTPase, ANK repeat and PH domain-containing protein 3 OS=Homo sapiens OX=9606 GN=AGAP3 PE=1 SV=2;tr|C9J975|C9J975_HUMAN Arf-GAP with GTPase, ANK repeat and PH domain-containing protein 3 OS=Homo sapiens OX=9606 GN=AGAP3 P	3	2	2	2	0	0	1	0	0	2	0	0	1	0	0	2	0	0	1	0	0	2	3.4	3.4	3.4	95.043	875	875;343;404	0	7.6858			By matching			By MS/MS	0	0	2.2	0	0	3.4
P35573	P35573	2	2	2	Glycogen debranching enzyme;4-alpha-glucanotransferase;Amylo-alpha-1,6-glucosidase	AGL	sp|P35573|GDE_HUMAN Glycogen debranching enzyme OS=Homo sapiens OX=9606 GN=AGL PE=1 SV=3	1	2	2	2	0	0	1	0	0	1	0	0	1	0	0	1	0	0	1	0	0	1	2	2	2	174.76	1532	1532	0	8.6395			By MS/MS			By MS/MS	0	0	1.5	0	0	1.5
Q9H9G7	Q9H9G7	3	1	1	Protein argonaute-3	AGO3	sp|Q9H9G7|AGO3_HUMAN Protein argonaute-3 OS=Homo sapiens OX=9606 GN=AGO3 PE=1 SV=2	1	3	1	1	0	0	2	0	1	2	0	0	1	0	0	1	0	0	1	0	0	1	5.7	1.9	1.9	97.359	860	860	0	13.309			By MS/MS		By matching	By MS/MS	0	0	3.8	0	2	3.8
A0A087X208;A0A494C0G5;A0A494C1I6;O00468	A0A087X208;A0A494C0G5;A0A494C1I6;O00468	16;16;16;16	16;16;16;16	16;16;16;16	Agrin;Agrin N-terminal 110 kDa subunit;Agrin C-terminal 110 kDa subunit;Agrin C-terminal 90 kDa fragment;Agrin C-terminal 22 kDa fragment	AGRN	tr|A0A087X208|A0A087X208_HUMAN Agrin OS=Homo sapiens OX=9606 GN=AGRN PE=1 SV=1;tr|A0A494C0G5|A0A494C0G5_HUMAN Agrin OS=Homo sapiens OX=9606 GN=AGRN PE=1 SV=1;tr|A0A494C1I6|A0A494C1I6_HUMAN Agrin OS=Homo sapiens OX=9606 GN=AGRN PE=1 SV=1;sp|O00468|AGRIN_HUM	4	16	16	16	12	0	0	0	13	0	12	0	0	0	13	0	12	0	0	0	13	0	10.4	10.4	10.4	202.29	1930	1930;1940;1963;2068	0	78.291	By MS/MS				By MS/MS		8.7	0	0	0	8.6	0
Q5T9B7;P00568	Q5T9B7;P00568	1;1	1;1	1;1	Adenylate kinase isoenzyme 1	AK1	tr|Q5T9B7|Q5T9B7_HUMAN Adenylate kinase isoenzyme 1 OS=Homo sapiens OX=9606 GN=AK1 PE=1 SV=1;sp|P00568|KAD1_HUMAN Adenylate kinase isoenzyme 1 OS=Homo sapiens OX=9606 GN=AK1 PE=1 SV=3	2	1	1	1	0	0	0	0	0	1	0	0	0	0	0	1	0	0	0	0	0	1	6.2	6.2	6.2	23.411	210	210;194	0.0021872	1.5715						By matching	0	0	0	0	0	6.2
Q9Y3D8;A0A087WVD7;D6RDH4;A0A087WY94	Q9Y3D8;A0A087WVD7;D6RDH4	6;5;4;2	6;5;4;2	6;5;4;2	Adenylate kinase isoenzyme 6	AK6;TAF9	sp|Q9Y3D8|KAD6_HUMAN Adenylate kinase isoenzyme 6 OS=Homo sapiens OX=9606 GN=AK6 PE=1 SV=1;tr|A0A087WVD7|A0A087WVD7_HUMAN Adenylate kinase isoenzyme 6 OS=Homo sapiens OX=9606 GN=AK6 PE=1 SV=1;tr|D6RDH4|D6RDH4_HUMAN Adenylate kinase isoenzyme 6 OS=Homo sapi	4	6	6	6	0	1	4	0	0	4	0	1	4	0	0	4	0	1	4	0	0	4	38.4	38.4	38.4	20.061	172	172;109;141;47	0	12.448		By matching	By MS/MS			By MS/MS	0	5.2	30.8	0	0	26.2
A0A087WY36;A8MYJ1	A0A087WY36;A8MYJ1	1;1	1;1	1;1		AKAP13	tr|A0A087WY36|A0A087WY36_HUMAN A-kinase anchor protein 13 (Fragment) OS=Homo sapiens OX=9606 GN=AKAP13 PE=1 SV=1;tr|A8MYJ1|A8MYJ1_HUMAN A-kinase anchor protein 13 OS=Homo sapiens OX=9606 GN=AKAP13 PE=1 SV=3	2	1	1	1	1	1	0	0	1	0	1	1	0	0	1	0	1	1	0	0	1	0	0.8	0.8	0.8	108.99	967	967;1434	1	-2	By MS/MS	By matching			By matching		0.8	0.8	0	0	0.8	0
C9JVY5;Q9Y2D5	C9JVY5;Q9Y2D5	2;2	2;2	2;2	A-kinase anchor protein 2	AKAP2	tr|C9JVY5|C9JVY5_HUMAN PALM2 and AKAP2 fusion (Fragment) OS=Homo sapiens OX=9606 GN=PALM2AKAP2 PE=1 SV=1;sp|Q9Y2D5|AKAP2_HUMAN A-kinase anchor protein 2 OS=Homo sapiens OX=9606 GN=AKAP2 PE=1 SV=3	2	2	2	2	1	1	0	1	1	2	1	1	0	1	1	2	1	1	0	1	1	2	4	4	4	85.282	778	778;859	0	4.2907	By MS/MS	By MS/MS		By MS/MS	By MS/MS	By MS/MS	2.4	2.4	0	2.4	2.4	4
Q53H80	Q53H80	1	1	1	Akirin-2	AKIRIN2	sp|Q53H80|AKIR2_HUMAN Akirin-2 OS=Homo sapiens OX=9606 GN=AKIRIN2 PE=1 SV=2	1	1	1	1	0	0	1	0	0	1	0	0	1	0	0	1	0	0	1	0	0	1	7.9	7.9	7.9	22.495	203	203	0	8.2147			By MS/MS			By MS/MS	0	0	7.9	0	0	7.9
V9GYG2;V9GYP9;Q5T621;P14550	V9GYG2;V9GYP9;Q5T621;P14550	1;1;1;1	1;1;1;1	1;1;1;1	Alcohol dehydrogenase [NADP(+)]	AKR1A1	tr|V9GYG2|V9GYG2_HUMAN Aldo-keto reductase family 1 member A1 OS=Homo sapiens OX=9606 GN=AKR1A1 PE=1 SV=1;tr|V9GYP9|V9GYP9_HUMAN Aldo-keto reductase family 1 member A1 (Fragment) OS=Homo sapiens OX=9606 GN=AKR1A1 PE=1 SV=1;tr|Q5T621|Q5T621_HUMAN Aldo-keto	4	1	1	1	0	0	1	0	0	1	0	0	1	0	0	1	0	0	1	0	0	1	8.4	8.4	8.4	13.306	119	119;140;147;325	0.0045045	1.2333			By MS/MS			By MS/MS	0	0	8.4	0	0	8.4
P15121;E9PCX2;E9PEF9	P15121;E9PCX2;E9PEF9	4;3;2	4;3;2	4;3;2	Aldose reductase	AKR1B1	sp|P15121|ALDR_HUMAN Aldo-keto reductase family 1 member B1 OS=Homo sapiens OX=9606 GN=AKR1B1 PE=1 SV=3;tr|E9PCX2|E9PCX2_HUMAN Aldo-keto reductase family 1 member B1 OS=Homo sapiens OX=9606 GN=AKR1B1 PE=1 SV=1;tr|E9PEF9|E9PEF9_HUMAN Aldo-keto reductase fam	3	4	4	4	0	0	4	0	0	3	0	0	4	0	0	3	0	0	4	0	0	3	22.8	22.8	22.8	35.853	316	316;263;102	0	7.7478			By MS/MS			By MS/MS	0	0	22.8	0	0	17.1
Q9H8T0;H3BM79;H3BNB8;H3BVH0;H3BRV2	Q9H8T0;H3BM79	7;4;1;1;1	7;4;1;1;1	7;4;1;1;1	AKT-interacting protein	AKTIP	sp|Q9H8T0|AKTIP_HUMAN AKT-interacting protein OS=Homo sapiens OX=9606 GN=AKTIP PE=1 SV=1;tr|H3BM79|H3BM79_HUMAN AKT-interacting protein (Fragment) OS=Homo sapiens OX=9606 GN=AKTIP PE=1 SV=1	5	7	7	7	0	0	2	1	0	5	0	0	2	1	0	5	0	0	2	1	0	5	36.3	36.3	36.3	33.128	292	292;249;127;136;149	0	23.432			By MS/MS	By matching		By MS/MS	0	0	15.1	7.9	0	32.9
Q8IZ83;F5H4B6	Q8IZ83;F5H4B6	3;2	3;2	3;2	Aldehyde dehydrogenase family 16 member A1	ALDH16A1	sp|Q8IZ83|A16A1_HUMAN Aldehyde dehydrogenase family 16 member A1 OS=Homo sapiens OX=9606 GN=ALDH16A1 PE=1 SV=2;tr|F5H4B6|F5H4B6_HUMAN Aldehyde dehydrogenase family 16 member A1 OS=Homo sapiens OX=9606 GN=ALDH16A1 PE=1 SV=1	2	3	3	3	0	0	0	1	0	1	0	0	0	1	0	1	0	0	0	1	0	1	4.9	4.9	4.9	85.126	802	802;639	0	4.6771				By MS/MS		By MS/MS	0	0	0	1.5	0	1.6
P54886	P54886	5	5	5	Delta-1-pyrroline-5-carboxylate synthase;Glutamate 5-kinase;Gamma-glutamyl phosphate reductase	ALDH18A1	sp|P54886|P5CS_HUMAN Delta-1-pyrroline-5-carboxylate synthase OS=Homo sapiens OX=9606 GN=ALDH18A1 PE=1 SV=2	1	5	5	5	0	0	4	0	1	3	0	0	4	0	1	3	0	0	4	0	1	3	7.9	7.9	7.9	87.301	795	795	0	5.5297			By MS/MS		By MS/MS	By MS/MS	0	0	6.8	0	1.4	4.5
P30837	P30837	2	2	2	Aldehyde dehydrogenase X, mitochondrial	ALDH1B1	sp|P30837|AL1B1_HUMAN Aldehyde dehydrogenase X, mitochondrial OS=Homo sapiens OX=9606 GN=ALDH1B1 PE=1 SV=3	1	2	2	2	0	0	2	0	0	2	0	0	2	0	0	2	0	0	2	0	0	2	6.2	6.2	6.2	57.206	517	517	0	3.8314			By MS/MS			By MS/MS	0	0	6.2	0	0	6.2
A0A1B0GV49;A0A1B0GTJ4;A0A1B0GUA1;A0A1B0GTG2;A0A1B0GW82;A0A1B0GW77;P49419;A0A1B0GUY0;A0A0J9YWF7;A0A1B0GTY9	A0A1B0GV49;A0A1B0GTJ4;A0A1B0GUA1;A0A1B0GTG2;A0A1B0GW82;A0A1B0GW77;P49419;A0A1B0GUY0	3;3;3;3;3;3;3;2;1;1	3;3;3;3;3;3;3;2;1;1	3;3;3;3;3;3;3;2;1;1	Alpha-aminoadipic semialdehyde dehydrogenase	ALDH7A1	tr|A0A1B0GV49|A0A1B0GV49_HUMAN Aldehyde dehydrogenase (NAD(+)) OS=Homo sapiens OX=9606 GN=ALDH7A1 PE=1 SV=1;tr|A0A1B0GTJ4|A0A1B0GTJ4_HUMAN Aldehyde dehydrogenase (NAD(+)) OS=Homo sapiens OX=9606 GN=ALDH7A1 PE=1 SV=1;tr|A0A1B0GUA1|A0A1B0GUA1_HUMAN Aldehyde	10	3	3	3	0	0	1	0	0	1	0	0	1	0	0	1	0	0	1	0	0	1	9.7	9.7	9.7	50.971	472	472;499;521;536;545;554;539;348;294;479	0	5.3517			By MS/MS			By MS/MS	0	0	3.6	0	0	3.6
Q6P6C2	Q6P6C2	1	1	1	RNA demethylase ALKBH5	ALKBH5	sp|Q6P6C2|ALKB5_HUMAN RNA demethylase ALKBH5 OS=Homo sapiens OX=9606 GN=ALKBH5 PE=1 SV=2	1	1	1	1	0	1	1	0	0	1	0	1	1	0	0	1	0	1	1	0	0	1	7.4	7.4	7.4	44.255	394	394	0	23.682		By matching	By MS/MS			By MS/MS	0	7.4	7.4	0	0	7.4
Q5VXN5;A0A5F9ZHD5;P17707	Q5VXN5;A0A5F9ZHD5;P17707	1;1;1	1;1;1	1;1;1	S-adenosylmethionine decarboxylase proenzyme;S-adenosylmethionine decarboxylase alpha chain;S-adenosylmethionine decarboxylase beta chain	AMD1	tr|Q5VXN5|Q5VXN5_HUMAN S-adenosylmethionine decarboxylase proenzyme OS=Homo sapiens OX=9606 GN=AMD1 PE=1 SV=1;tr|A0A5F9ZHD5|A0A5F9ZHD5_HUMAN Adenosylmethionine decarboxylase OS=Homo sapiens OX=9606 GN=AMD1 PE=1 SV=1;sp|P17707|DCAM_HUMAN S-adenosylmethionin	3	1	1	1	0	0	1	0	0	1	0	0	1	0	0	1	0	0	1	0	0	1	5.7	5.7	5.7	30.497	265	265;462;334	0	6.6188			By MS/MS			By MS/MS	0	0	5.7	0	0	5.7
Q9BXJ7	Q9BXJ7	1	1	1	Protein amnionless	AMN	sp|Q9BXJ7|AMNLS_HUMAN Protein amnionless OS=Homo sapiens OX=9606 GN=AMN PE=1 SV=2	1	1	1	1	1	1	0	1	0	0	1	1	0	1	0	0	1	1	0	1	0	0	5.1	5.1	5.1	47.754	453	453	0.0045492	1.2802	By matching	By MS/MS		By matching			5.1	5.1	0	5.1	0	0
Q8IY63	Q8IY63	3	1	1	Angiomotin-like protein 1	AMOTL1	sp|Q8IY63|AMOL1_HUMAN Angiomotin-like protein 1 OS=Homo sapiens OX=9606 GN=AMOTL1 PE=1 SV=1	1	3	1	1	0	1	1	0	1	2	0	1	1	0	1	1	0	1	1	0	1	1	4	1.6	1.6	106.57	956	956	0.0052462	1.1924		By matching	By MS/MS		By MS/MS	By MS/MS	0	1.6	1.6	0	1.6	2.5
E9PJF6;E9PIJ1;A0A7P0TB79;A0A590UJX5	E9PJF6;E9PIJ1;A0A7P0TB79;A0A590UJX5	2;1;1;1	2;1;1;1	1;0;0;0		AMPD2	tr|E9PJF6|E9PJF6_HUMAN AMP deaminase 2 (Fragment) OS=Homo sapiens OX=9606 GN=AMPD2 PE=1 SV=1;tr|E9PIJ1|E9PIJ1_HUMAN AMP deaminase 2 (Fragment) OS=Homo sapiens OX=9606 GN=AMPD2 PE=1 SV=1;tr|A0A7P0TB79|A0A7P0TB79_HUMAN AMP deaminase 2 OS=Homo sapiens OX=9606	4	2	2	1	1	1	1	2	2	0	1	1	1	2	2	0	1	1	0	1	1	0	31.1	31.1	16.5	11.601	103	103;87;237;469	0.0029762	1.4131	By matching	By MS/MS	By MS/MS	By MS/MS	By MS/MS		16.5	16.5	14.6	31.1	31.1	0
H0Y564;Q9H1A4	H0Y564;Q9H1A4	3;3	3;3	3;3	Anaphase-promoting complex subunit 1	ANAPC1	tr|H0Y564|H0Y564_HUMAN Anaphase-promoting complex subunit 1 (Fragment) OS=Homo sapiens OX=9606 GN=ANAPC1 PE=1 SV=1;sp|Q9H1A4|APC1_HUMAN Anaphase-promoting complex subunit 1 OS=Homo sapiens OX=9606 GN=ANAPC1 PE=1 SV=1	2	3	3	3	0	0	0	0	0	1	0	0	0	0	0	1	0	0	0	0	0	1	3.1	3.1	3.1	161.45	1452	1452;1944	0.0052846	1.2115						By MS/MS	0	0	0	0	0	1
F5GXB9;F5H2T3;F8WDQ6;F5H3R3;F5H6E4;G5EA39;P60006	F5GXB9;F5H2T3;F8WDQ6;F5H3R3;F5H6E4;G5EA39;P60006	1;1;1;1;1;1;1	1;1;1;1;1;1;1	1;1;1;1;1;1;1	Anaphase-promoting complex subunit 15	ANAPC15	tr|F5GXB9|F5GXB9_HUMAN Anaphase-promoting complex subunit 15 (Fragment) OS=Homo sapiens OX=9606 GN=ANAPC15 PE=1 SV=8;tr|F5H2T3|F5H2T3_HUMAN Anaphase-promoting complex subunit 15 (Fragment) OS=Homo sapiens OX=9606 GN=ANAPC15 PE=1 SV=1;tr|F8WDQ6|F8WDQ6_HUMAN	7	1	1	1	1	0	1	1	1	1	1	0	1	1	1	1	1	0	1	1	1	1	22.7	22.7	22.7	5.3059	44	44;65;92;110;123;190;121	0.0084713	1.0081	By MS/MS		By MS/MS	By MS/MS	By MS/MS	By matching	22.7	0	22.7	22.7	22.7	22.7
D6RFM7;D6RAP6;Q9UJX5	D6RFM7;D6RAP6;Q9UJX5	1;1;1	1;1;1	1;1;1	Anaphase-promoting complex subunit 4	ANAPC4	tr|D6RFM7|D6RFM7_HUMAN Anaphase-promoting complex subunit 4 OS=Homo sapiens OX=9606 GN=ANAPC4 PE=1 SV=1;tr|D6RAP6|D6RAP6_HUMAN Anaphase-promoting complex subunit 4 (Fragment) OS=Homo sapiens OX=9606 GN=ANAPC4 PE=1 SV=1;sp|Q9UJX5|APC4_HUMAN Anaphase-promoti	3	1	1	1	0	0	0	0	0	0	0	0	0	0	0	0	0	0	0	0	0	0	19.3	19.3	19.3	9.7085	83	83;162;808	0	2.6825							0	0	0	0	0	0
Q9Y264	Q9Y264	1	1	1	Angiopoietin-4	ANGPT4	sp|Q9Y264|ANGP4_HUMAN Angiopoietin-4 OS=Homo sapiens OX=9606 GN=ANGPT4 PE=1 SV=1	1	1	1	1	0	0	0	1	1	0	0	0	0	1	1	0	0	0	0	1	1	0	2.2	2.2	2.2	56.848	503	503	1	-2				By matching	By matching		0	0	0	2.2	2.2	0
E9PDP5;Q8IWZ3;D6RHC4;H7C2F5;H3BLS9;H0YLQ3	E9PDP5;Q8IWZ3	5;5;1;1;1;1	1;1;0;0;0;0	1;1;0;0;0;0	Ankyrin repeat and KH domain-containing protein 1	ANKHD1	tr|E9PDP5|E9PDP5_HUMAN Ankyrin repeat and KH domain-containing protein 1 (Fragment) OS=Homo sapiens OX=9606 GN=ANKHD1 PE=1 SV=1;sp|Q8IWZ3|ANKH1_HUMAN Ankyrin repeat and KH domain-containing protein 1 OS=Homo sapiens OX=9606 GN=ANKHD1 PE=1 SV=1	6	5	1	1	1	1	2	1	1	3	1	1	0	1	1	0	1	1	0	1	1	0	4.9	1	1	166.74	1565	1565;2542;368;608;687;862	1	-2	By MS/MS	By matching	By matching	By MS/MS	By MS/MS	By matching	1	1	2.5	1	1	3.8
Q8IZ07;S4R3D2;S4R3U2;H0YIN8	Q8IZ07;S4R3D2;S4R3U2;H0YIN8	2;1;1;1	2;1;1;1	2;1;1;1	Ankyrin repeat domain-containing protein 13A	ANKRD13A	sp|Q8IZ07|AN13A_HUMAN Ankyrin repeat domain-containing protein 13A OS=Homo sapiens OX=9606 GN=ANKRD13A PE=1 SV=3;tr|S4R3D2|S4R3D2_HUMAN Ankyrin repeat domain-containing protein 13A OS=Homo sapiens OX=9606 GN=ANKRD13A PE=1 SV=1;tr|S4R3U2|S4R3U2_HUMAN Ankyri	4	2	2	2	0	0	0	0	0	0	0	0	0	0	0	0	0	0	0	0	0	0	3.9	3.9	3.9	67.618	590	590;173;173;301	1	-2							0	0	0	0	0	0
O75179;H0YM23;A0A1W2PQ15	O75179;H0YM23;A0A1W2PQ15	6;6;5	6;6;5	2;2;2	Ankyrin repeat domain-containing protein 17	ANKRD17	sp|O75179|ANR17_HUMAN Ankyrin repeat domain-containing protein 17 OS=Homo sapiens OX=9606 GN=ANKRD17 PE=1 SV=3;tr|H0YM23|H0YM23_HUMAN Ankyrin repeat domain-containing protein 17 (Fragment) OS=Homo sapiens OX=9606 GN=ANKRD17 PE=1 SV=1;tr|A0A1W2PQ15|A0A1W2PQ	3	6	6	2	0	0	3	0	0	4	0	0	3	0	0	4	0	0	1	0	0	1	3.3	3.3	1	274.25	2603	2603;2487;1123	0	25.188			By MS/MS			By MS/MS	0	0	2	0	0	2.8
A0A1B0GTQ5;A0A1B0GW59;R4GN29;Q8IVF6	A0A1B0GTQ5;A0A1B0GW59;R4GN29;Q8IVF6	1;1;1;1	1;1;1;1	1;1;1;1	Ankyrin repeat domain-containing protein 18A	ANKRD18A	tr|A0A1B0GTQ5|A0A1B0GTQ5_HUMAN Family with sequence similarity 95 member C (Fragment) OS=Homo sapiens OX=9606 GN=FAM95C PE=4 SV=1;tr|A0A1B0GW59|A0A1B0GW59_HUMAN Family with sequence similarity 95 member C (Fragment) OS=Homo sapiens OX=9606 GN=FAM95C PE=4 S	4	1	1	1	0	0	0	0	0	0	0	0	0	0	0	0	0	0	0	0	0	0	4.1	4.1	4.1	25.02	221	221;222;401;992	1	-2							0	0	0	0	0	0
Q5T457;A0A0A0MRN9;Q9GZV1	Q5T457;A0A0A0MRN9;Q9GZV1	1;1;1	1;1;1	1;1;1	Ankyrin repeat domain-containing protein 2	ANKRD2	tr|Q5T457|Q5T457_HUMAN Ankyrin repeat domain-containing protein 2 OS=Homo sapiens OX=9606 GN=ANKRD2 PE=1 SV=1;tr|A0A0A0MRN9|A0A0A0MRN9_HUMAN Ankyrin repeat domain-containing protein 2 OS=Homo sapiens OX=9606 GN=ANKRD2 PE=1 SV=1;sp|Q9GZV1|ANKR2_HUMAN Ankyri	3	1	1	1	0	1	0	0	0	0	0	1	0	0	0	0	0	1	0	0	0	0	5.7	5.7	5.7	33.454	300	300;333;360	1	-2		By MS/MS					0	5.7	0	0	0	0
O15084;B4DIW9	O15084;B4DIW9	6;3	6;3	6;3	Serine/threonine-protein phosphatase 6 regulatory ankyrin repeat subunit A	ANKRD28	sp|O15084|ANR28_HUMAN Serine/threonine-protein phosphatase 6 regulatory ankyrin repeat subunit A OS=Homo sapiens OX=9606 GN=ANKRD28 PE=1 SV=5;tr|B4DIW9|B4DIW9_HUMAN Serine/threonine-protein phosphatase 6 regulatory ankyrin repeat subunit A OS=Homo sapiens	2	6	6	6	0	0	1	0	0	2	0	0	1	0	0	2	0	0	1	0	0	2	7.9	7.9	7.9	112.96	1053	1053;722	0	7.0637			By MS/MS			By MS/MS	0	0	1.8	0	0	4
F6XZD3	F6XZD3	1	1	1		ANKRD35	tr|F6XZD3|F6XZD3_HUMAN Ankyrin repeat domain-containing protein 35 OS=Homo sapiens OX=9606 GN=ANKRD35 PE=1 SV=1	1	1	1	1	0	0	1	0	1	1	0	0	1	0	1	1	0	0	1	0	1	1	1.8	1.8	1.8	100.33	911	911	1	-2			By matching		By MS/MS	By MS/MS	0	0	1.8	0	1.8	1.8
Q8NB46	Q8NB46	1	1	1	Serine/threonine-protein phosphatase 6 regulatory ankyrin repeat subunit C	ANKRD52	sp|Q8NB46|ANR52_HUMAN Serine/threonine-protein phosphatase 6 regulatory ankyrin repeat subunit C OS=Homo sapiens OX=9606 GN=ANKRD52 PE=1 SV=3	1	1	1	1	0	0	0	0	0	0	0	0	0	0	0	0	0	0	0	0	0	0	2.1	2.1	2.1	115.08	1076	1076	0.0052568	1.198							0	0	0	0	0	0
H7BZV9;C9JU48;Q6NXT1;H7C3L3;D3YTC9	H7BZV9;C9JU48;Q6NXT1;H7C3L3;D3YTC9	2;2;2;1;1	2;2;2;1;1	2;2;2;1;1	Ankyrin repeat domain-containing protein 54	ANKRD54	tr|H7BZV9|H7BZV9_HUMAN Ankyrin repeat domain-containing protein 54 (Fragment) OS=Homo sapiens OX=9606 GN=ANKRD54 PE=1 SV=1;tr|C9JU48|C9JU48_HUMAN Ankyrin repeat domain-containing protein 54 (Fragment) OS=Homo sapiens OX=9606 GN=ANKRD54 PE=1 SV=8;sp|Q6NXT1|	5	2	2	2	0	0	1	0	0	2	0	0	1	0	0	2	0	0	1	0	0	2	27	27	27	18.499	178	178;216;300;208;284	0	41.39			By MS/MS			By MS/MS	0	0	9.6	0	0	27
Q9BZ19	Q9BZ19	1	1	1	Ankyrin repeat domain-containing protein 60	ANKRD60	sp|Q9BZ19|ANR60_HUMAN Ankyrin repeat domain-containing protein 60 OS=Homo sapiens OX=9606 GN=ANKRD60 PE=4 SV=3	1	1	1	1	0	0	0	0	1	0	0	0	0	0	1	0	0	0	0	0	1	0	3.8	3.8	3.8	37.63	345	345	1	-2					By MS/MS		0	0	0	0	3.8	0
B8ZZS4;Q9H8Y5	B8ZZS4;Q9H8Y5	1;1	1;1	1;1	Ankyrin repeat and zinc finger domain-containing protein 1	ANKZF1	tr|B8ZZS4|B8ZZS4_HUMAN Ankyrin repeat and zinc finger domain-containing protein 1 OS=Homo sapiens OX=9606 GN=ANKZF1 PE=1 SV=1;sp|Q9H8Y5|ANKZ1_HUMAN Ankyrin repeat and zinc finger domain-containing protein 1 OS=Homo sapiens OX=9606 GN=ANKZF1 PE=1 SV=1	2	1	1	1	0	0	0	0	0	0	0	0	0	0	0	0	0	0	0	0	0	0	4.8	4.8	4.8	57.572	516	516;726	0.00046512	2.0327							0	0	0	0	0	0
Q92688	Q92688	2	1	1	Acidic leucine-rich nuclear phosphoprotein 32 family member B	ANP32B	sp|Q92688|AN32B_HUMAN Acidic leucine-rich nuclear phosphoprotein 32 family member B OS=Homo sapiens OX=9606 GN=ANP32B PE=1 SV=1	1	2	1	1	1	1	1	1	1	2	0	0	1	0	0	1	0	0	1	0	0	1	11.2	8.4	8.4	28.787	251	251	0	9.7678	By matching	By matching	By matching	By matching	By matching	By MS/MS	2.8	2.8	8.4	2.8	2.8	11.2
A0A2R8YGH5;H7C1E4;P61966	A0A2R8YGH5;H7C1E4;P61966	1;1;1	1;1;1	1;1;1	AP-1 complex subunit sigma-1A	AP1S1	tr|A0A2R8YGH5|A0A2R8YGH5_HUMAN AP complex subunit sigma OS=Homo sapiens OX=9606 GN=AP1S1 PE=1 SV=1;tr|H7C1E4|H7C1E4_HUMAN AP-1 complex subunit sigma-1A (Fragment) OS=Homo sapiens OX=9606 GN=AP1S1 PE=1 SV=1;sp|P61966|AP1S1_HUMAN AP-1 complex subunit sigma-1	3	1	1	1	0	0	0	0	0	0	0	0	0	0	0	0	0	0	0	0	0	0	10.2	10.2	10.2	18.602	157	157;191;158	0	13.649							0	0	0	0	0	0
P56377	P56377	1	1	1	AP-1 complex subunit sigma-2	AP1S2	sp|P56377|AP1S2_HUMAN AP-1 complex subunit sigma-2 OS=Homo sapiens OX=9606 GN=AP1S2 PE=1 SV=1	1	1	1	1	0	0	1	0	0	1	0	0	1	0	0	1	0	0	1	0	0	1	10.2	10.2	10.2	18.615	157	157	0	9.6397			By MS/MS			By MS/MS	0	0	10.2	0	0	10.2
Q9Y2T2;H0YBA0;E7ER80;E5RJ52;P53677	Q9Y2T2;H0YBA0;E7ER80;E5RJ52;P53677	2;1;1;1;1	2;1;1;1;1	2;1;1;1;1	AP-3 complex subunit mu-1;AP-3 complex subunit mu-2	AP3M1;AP3M2	sp|Q9Y2T2|AP3M1_HUMAN AP-3 complex subunit mu-1 OS=Homo sapiens OX=9606 GN=AP3M1 PE=1 SV=1;tr|H0YBA0|H0YBA0_HUMAN AP-3 complex subunit mu-2 (Fragment) OS=Homo sapiens OX=9606 GN=AP3M2 PE=1 SV=1;tr|E7ER80|E7ER80_HUMAN AP-3 complex subunit mu-2 OS=Homo sapie	5	2	2	2	0	0	2	0	0	0	0	0	2	0	0	0	0	0	2	0	0	0	9.1	9.1	9.1	46.939	418	418;131;268;287;418	0	3.776			By MS/MS				0	0	9.1	0	0	0
Q92572;F5H459	Q92572;F5H459	4;2	4;2	4;2	AP-3 complex subunit sigma-1	AP3S1	sp|Q92572|AP3S1_HUMAN AP-3 complex subunit sigma-1 OS=Homo sapiens OX=9606 GN=AP3S1 PE=1 SV=1;tr|F5H459|F5H459_HUMAN AP complex subunit sigma OS=Homo sapiens OX=9606 GN=AP3S1 PE=1 SV=1	2	4	4	4	1	1	0	2	1	3	1	1	0	2	1	3	1	1	0	2	1	3	29	29	29	21.732	193	193;162	0	6.9385	By MS/MS	By MS/MS		By MS/MS	By matching	By MS/MS	9.3	9.3	0	15	9.3	21.2
Q9Y587;G3V4P7;G3V5J6;A0A5F9ZHV3;G3V3X7;A0A5F9ZI62;A0A5F9ZH42	Q9Y587	3;1;1;1;1;1;1	3;1;1;1;1;1;1	3;1;1;1;1;1;1	AP-4 complex subunit sigma-1	AP4S1	sp|Q9Y587|AP4S1_HUMAN AP-4 complex subunit sigma-1 OS=Homo sapiens OX=9606 GN=AP4S1 PE=1 SV=1	7	3	3	3	0	0	1	0	0	2	0	0	1	0	0	2	0	0	1	0	0	2	16.7	16.7	16.7	17.005	144	144;98;102;117;133;135;141	0.00089127	1.7181			By MS/MS			By MS/MS	0	0	6.9	0	0	9.7
Q9BZZ5;G3V1C3;H0YER7	Q9BZZ5;G3V1C3;H0YER7	2;2;1	2;2;1	2;2;1	Apoptosis inhibitor 5	API5	sp|Q9BZZ5|API5_HUMAN Apoptosis inhibitor 5 OS=Homo sapiens OX=9606 GN=API5 PE=1 SV=3;tr|G3V1C3|G3V1C3_HUMAN Apoptosis inhibitor 5 OS=Homo sapiens OX=9606 GN=API5 PE=1 SV=1;tr|H0YER7|H0YER7_HUMAN Apoptosis inhibitor 5 (Fragment) OS=Homo sapiens OX=9606 GN=A	3	2	2	2	0	0	0	0	0	0	0	0	0	0	0	0	0	0	0	0	0	0	7.3	7.3	7.3	59.004	524	524;510;294	0	15.661							0	0	0	0	0	0
Q9NRW3	Q9NRW3	2	1	1	DNA dC->dU-editing enzyme APOBEC-3C	APOBEC3C	sp|Q9NRW3|ABC3C_HUMAN DNA dC->dU-editing enzyme APOBEC-3C OS=Homo sapiens OX=9606 GN=APOBEC3C PE=1 SV=2	1	2	1	1	0	0	2	0	0	2	0	0	1	0	0	1	0	0	1	0	0	1	13.7	7.4	7.4	22.826	190	190	0.00048473	2.3755			By matching			By MS/MS	0	0	13.7	0	0	13.7
Q96LR9	Q96LR9	1	1	1	Apolipoprotein L domain-containing protein 1	APOLD1	sp|Q96LR9|APLD1_HUMAN Apolipoprotein L domain-containing protein 1 OS=Homo sapiens OX=9606 GN=APOLD1 PE=2 SV=2	1	1	1	1	1	1	0	1	1	0	1	1	0	1	1	0	1	1	0	1	1	0	4.3	4.3	4.3	30.546	279	279	1	-2	By MS/MS	By MS/MS		By MS/MS	By MS/MS		4.3	4.3	0	4.3	4.3	0
Q9UKG1;C9K0C4	Q9UKG1	4;1	4;1	4;1	DCC-interacting protein 13-alpha	APPL1	sp|Q9UKG1|DP13A_HUMAN DCC-interacting protein 13-alpha OS=Homo sapiens OX=9606 GN=APPL1 PE=1 SV=1	2	4	4	4	0	1	2	0	1	2	0	1	2	0	1	2	0	1	2	0	1	2	9	9	9	79.663	709	709;114	0	17.762		By MS/MS	By MS/MS		By matching	By MS/MS	0	2.7	4.2	0	2.7	4.2
F5H423;P84077;P61204;F5H0C7;C9JPM4;C9J1Z8;P84085;P18085;C9JAK5	F5H423;P84077;P61204;F5H0C7;C9JPM4;C9J1Z8;P84085;P18085	4;4;4;3;2;2;2;2;1	4;4;4;3;2;2;2;2;1	4;4;4;3;2;2;2;2;1	ADP-ribosylation factor 1;ADP-ribosylation factor 3;ADP-ribosylation factor 5;ADP-ribosylation factor 4	ARF1;ARF3;ARF4;ARF5	tr|F5H423|F5H423_HUMAN Uncharacterized protein OS=Homo sapiens OX=9606 PE=3 SV=1;sp|P84077|ARF1_HUMAN ADP-ribosylation factor 1 OS=Homo sapiens OX=9606 GN=ARF1 PE=1 SV=2;sp|P61204|ARF3_HUMAN ADP-ribosylation factor 3 OS=Homo sapiens OX=9606 GN=ARF3 PE=1 SV	9	4	4	4	0	0	1	0	0	2	0	0	1	0	0	2	0	0	1	0	0	2	37.6	37.6	37.6	23.346	210	210;181;181;102;127;150;180;180;153	0	39.502			By MS/MS			By MS/MS	0	0	9.5	0	0	19
E9PQP3;A0A0D9SF70;G5E9L0;Q8N6H7;E9PMR9;E9PM63;E9PJT7;E9PK28;E9PN48;E9PIY6;E9PM18;E9PNY8;H0YF45;H0YDX1;E9PMU9;H0YDN9	E9PQP3;A0A0D9SF70;G5E9L0;Q8N6H7;E9PMR9;E9PM63;E9PJT7;E9PK28;E9PN48;E9PIY6	3;3;3;3;2;2;2;2;2;2;1;1;1;1;1;1	3;3;3;3;2;2;2;2;2;2;1;1;1;1;1;1	3;3;3;3;2;2;2;2;2;2;1;1;1;1;1;1	ADP-ribosylation factor GTPase-activating protein 2	ARFGAP2	tr|E9PQP3|E9PQP3_HUMAN ADP-ribosylation factor GTPase-activating protein 2 (Fragment) OS=Homo sapiens OX=9606 GN=ARFGAP2 PE=1 SV=1;tr|A0A0D9SF70|A0A0D9SF70_HUMAN ADP-ribosylation factor GTPase-activating protein 2 OS=Homo sapiens OX=9606 GN=ARFGAP2 PE=1 SV	16	3	3	3	0	0	3	0	0	0	0	0	3	0	0	0	0	0	3	0	0	0	17.2	17.2	17.2	30.597	274	274;385;493;521;89;94;173;238;252;327;70;110;119;133;156;237	0	14.494			By MS/MS				0	0	17.2	0	0	0
A0A5F9ZH78;P05089	A0A5F9ZH78;P05089	2;2	2;2	2;2	Arginase-1	ARG1	tr|A0A5F9ZH78|A0A5F9ZH78_HUMAN Arginase-1 OS=Homo sapiens OX=9606 GN=ARG1 PE=1 SV=1;sp|P05089|ARGI1_HUMAN Arginase-1 OS=Homo sapiens OX=9606 GN=ARG1 PE=1 SV=2	2	2	2	2	2	1	1	2	0	0	2	1	1	2	0	0	2	1	1	2	0	0	9.3	9.3	9.3	25.66	237	237;322	0.0029499	1.376	By MS/MS	By MS/MS	By MS/MS	By MS/MS			9.3	4.6	4.6	9.3	0	0
A0A0C4DGG5;Q9P2F6	A0A0C4DGG5;Q9P2F6	1;1	1;1	1;1	Rho GTPase-activating protein 20	ARHGAP20	tr|A0A0C4DGG5|A0A0C4DGG5_HUMAN Rho GTPase-activating protein 20 OS=Homo sapiens OX=9606 GN=ARHGAP20 PE=1 SV=1;sp|Q9P2F6|RHG20_HUMAN Rho GTPase-activating protein 20 OS=Homo sapiens OX=9606 GN=ARHGAP20 PE=1 SV=2	2	1	1	1	0	0	0	0	0	1	0	0	0	0	0	1	0	0	0	0	0	1	1.9	1.9	1.9	80.897	731	731;1191	1	-2						By MS/MS	0	0	0	0	0	1.9
E9PDQ5;B1ALK7;A0A2R8YG42;Q14155;E7EUY6;F6SJA5;Q15052	E9PDQ5;B1ALK7;A0A2R8YG42;Q14155;E7EUY6	6;6;6;6;4;2;2	6;6;6;6;4;2;2	6;6;6;6;4;2;2	Rho guanine nucleotide exchange factor 7	ARHGEF7	tr|E9PDQ5|E9PDQ5_HUMAN Rho guanine nucleotide exchange factor 7 OS=Homo sapiens OX=9606 GN=ARHGEF7 PE=1 SV=1;tr|B1ALK7|B1ALK7_HUMAN Rho guanine nucleotide exchange factor 7 OS=Homo sapiens OX=9606 GN=ARHGEF7 PE=1 SV=1;tr|A0A2R8YG42|A0A2R8YG42_HUMAN Rho gua	7	6	6	6	0	0	5	0	0	2	0	0	5	0	0	2	0	0	5	0	0	2	14.6	14.6	14.6	61.629	547	547;705;862;803;447;130;776	0	9.1867			By MS/MS			By MS/MS	0	0	12.2	0	0	6
H0Y488;A0A1B0GTU5;O14497;A0A087WUV6	H0Y488;A0A1B0GTU5;O14497;A0A087WUV6	4;4;4;2	4;4;4;2	4;4;4;2	AT-rich interactive domain-containing protein 1A	ARID1A	tr|H0Y488|H0Y488_HUMAN AT-rich interactive domain-containing protein 1A OS=Homo sapiens OX=9606 GN=ARID1A PE=1 SV=2;tr|A0A1B0GTU5|A0A1B0GTU5_HUMAN AT-rich interactive domain-containing protein 1A (Fragment) OS=Homo sapiens OX=9606 GN=ARID1A PE=1 SV=1;sp|O1	4	4	4	4	1	2	3	2	1	3	1	2	3	2	1	3	1	2	3	2	1	3	3.1	3.1	3.1	205.83	1901	1901;1903;2285;1141	0	5.7047	By MS/MS	By MS/MS	By MS/MS	By MS/MS	By matching	By MS/MS	1.1	1.7	2	1.7	1.1	2
H3BU49;Q9Y2Y0	H3BU49;Q9Y2Y0	2;2	2;2	2;2	ADP-ribosylation factor-like protein 2-binding protein	ARL2BP	tr|H3BU49|H3BU49_HUMAN ADP-ribosylation factor-like protein 2-binding protein OS=Homo sapiens OX=9606 GN=ARL2BP PE=1 SV=1;sp|Q9Y2Y0|AR2BP_HUMAN ADP-ribosylation factor-like protein 2-binding protein OS=Homo sapiens OX=9606 GN=ARL2BP PE=1 SV=1	2	2	2	2	0	0	0	0	1	1	0	0	0	0	1	1	0	0	0	0	1	1	22.8	22.8	22.8	13.812	123	123;163	0	2.8801					By MS/MS	By MS/MS	0	0	0	0	10.6	12.2
P36405	P36405	7	7	7	ADP-ribosylation factor-like protein 3	ARL3	sp|P36405|ARL3_HUMAN ADP-ribosylation factor-like protein 3 OS=Homo sapiens OX=9606 GN=ARL3 PE=1 SV=2	1	7	7	7	0	0	2	0	0	3	0	0	2	0	0	3	0	0	2	0	0	3	52.7	52.7	52.7	20.455	182	182	0	15.492			By MS/MS			By MS/MS	0	0	19.2	0	0	18.7
F5GYV5;H7BZV4;A0A0C4DG62;F8WCT1;Q66PJ3;F8WEP2;A0A0C4DH18;F5H7X4	F5GYV5;H7BZV4;A0A0C4DG62;F8WCT1;Q66PJ3;F8WEP2;A0A0C4DH18;F5H7X4	2;2;2;2;2;1;1;1	2;2;2;2;2;1;1;1	2;2;2;2;2;1;1;1	ADP-ribosylation factor-like protein 6-interacting protein 4	ARL6IP4	tr|F5GYV5|F5GYV5_HUMAN ADP-ribosylation factor-like protein 6-interacting protein 4 (Fragment) OS=Homo sapiens OX=9606 GN=ARL6IP4 PE=1 SV=1;tr|H7BZV4|H7BZV4_HUMAN ADP-ribosylation factor-like protein 6-interacting protein 4 (Fragment) OS=Homo sapiens OX=96	8	2	2	2	1	2	0	1	2	0	1	2	0	1	2	0	1	2	0	1	2	0	16.6	16.6	16.6	23.687	211	211;216;218;229;421;170;181;307	0	3.2492	By MS/MS	By MS/MS		By MS/MS	By MS/MS		8.1	16.6	0	8.1	16.6	0
Q9H6L4	Q9H6L4	1	1	1	Armadillo repeat-containing protein 7	ARMC7	sp|Q9H6L4|ARMC7_HUMAN Armadillo repeat-containing protein 7 OS=Homo sapiens OX=9606 GN=ARMC7 PE=1 SV=1	1	1	1	1	0	0	0	0	0	0	0	0	0	0	0	0	0	0	0	0	0	0	7.1	7.1	7.1	21.924	198	198	0.0078247	1.0694							0	0	0	0	0	0
C9J8P8;G5E9V7;B7Z637	C9J8P8;G5E9V7;B7Z637	1;1;1	1;1;1	1;1;1		ARMC8	tr|C9J8P8|C9J8P8_HUMAN Armadillo repeat-containing protein 8 (Fragment) OS=Homo sapiens OX=9606 GN=ARMC8 PE=1 SV=1;tr|G5E9V7|G5E9V7_HUMAN Armadillo repeat-containing protein 8 OS=Homo sapiens OX=9606 GN=ARMC8 PE=1 SV=1;tr|B7Z637|B7Z637_HUMAN Armadillo repe	3	1	1	1	1	1	0	1	0	0	1	1	0	1	0	0	1	1	0	1	0	0	9.2	9.2	9.2	14.394	130	130;357;600	1	-2	By matching	By MS/MS		By MS/MS			9.2	9.2	0	9.2	0	0
E9PF58;A0A1W2PNV4;Q92747	E9PF58;A0A1W2PNV4;Q92747	1;1;1	1;1;1	1;1;1	Actin-related protein 2/3 complex subunit 1A	ARPC1A	tr|E9PF58|E9PF58_HUMAN Actin-related protein 2/3 complex subunit 1A OS=Homo sapiens OX=9606 GN=ARPC1A PE=1 SV=1;tr|A0A1W2PNV4|A0A1W2PNV4_HUMAN Uncharacterized protein OS=Homo sapiens OX=9606 PE=3 SV=1;sp|Q92747|ARC1A_HUMAN Actin-related protein 2/3 complex	3	1	1	1	0	0	1	0	0	1	0	0	1	0	0	1	0	0	1	0	0	1	4.7	4.7	4.7	30.888	279	279;684;370	1	-2			By MS/MS			By MS/MS	0	0	4.7	0	0	4.7
O15145;F8VR50;C9JZD1	O15145;F8VR50;C9JZD1	3;2;2	3;2;2	3;2;2	Actin-related protein 2/3 complex subunit 3	ARPC3	sp|O15145|ARPC3_HUMAN Actin-related protein 2/3 complex subunit 3 OS=Homo sapiens OX=9606 GN=ARPC3 PE=1 SV=3;tr|F8VR50|F8VR50_HUMAN Actin-related protein 2/3 complex subunit 3 (Fragment) OS=Homo sapiens OX=9606 GN=ARPC3 PE=1 SV=1;tr|C9JZD1|C9JZD1_HUMAN Act	3	3	3	3	1	1	1	0	0	3	1	1	1	0	0	3	1	1	1	0	0	3	19.1	19.1	19.1	20.546	178	178;84;99	0.00089047	1.7124	By MS/MS	By matching	By MS/MS			By MS/MS	9	9	6.2	0	0	19.1
A0A0C4DFZ2;P15289	A0A0C4DFZ2;P15289	2;2	2;2	2;2	Arylsulfatase A;Arylsulfatase A component B;Arylsulfatase A component C	ARSA	tr|A0A0C4DFZ2|A0A0C4DFZ2_HUMAN Arylsulfatase A OS=Homo sapiens OX=9606 GN=ARSA PE=1 SV=1;sp|P15289|ARSA_HUMAN Arylsulfatase A OS=Homo sapiens OX=9606 GN=ARSA PE=1 SV=3	2	2	2	2	0	0	1	0	0	2	0	0	1	0	0	2	0	0	1	0	0	2	5.5	5.5	5.5	53.806	509	509;507	0.00048286	2.3119			By matching			By MS/MS	0	0	3.3	0	0	5.5
A0A087WVD4;Q9HBK9	A0A087WVD4;Q9HBK9	4;4	4;4	4;4	Arsenite methyltransferase	AS3MT	tr|A0A087WVD4|A0A087WVD4_HUMAN Arsenite methyltransferase OS=Homo sapiens OX=9606 GN=AS3MT PE=1 SV=1;sp|Q9HBK9|AS3MT_HUMAN Arsenite methyltransferase OS=Homo sapiens OX=9606 GN=AS3MT PE=1 SV=3	2	4	4	4	0	0	2	0	0	3	0	0	2	0	0	3	0	0	2	0	0	3	18.3	18.3	18.3	37.969	338	338;375	0	5.2766			By MS/MS			By MS/MS	0	0	9.2	0	0	14.5
Q9H672	Q9H672	1	1	1	Ankyrin repeat and SOCS box protein 7	ASB7	sp|Q9H672|ASB7_HUMAN Ankyrin repeat and SOCS box protein 7 OS=Homo sapiens OX=9606 GN=ASB7 PE=1 SV=2	1	1	1	1	0	0	0	0	0	0	0	0	0	0	0	0	0	0	0	0	0	0	3.1	3.1	3.1	36.011	318	318	1	-2							0	0	0	0	0	0
A0A5F9ZH79;A0A5F9ZHP1;E9PM82;E9PQZ6;A0A5K1VW55;A0A5F9ZI37;E9PKM6;A0A5F9ZI10;H0YCB3;Q8N9N2;A0A5F9ZGP6;E9PL92;E9PR40;H0YE76	A0A5F9ZH79;A0A5F9ZHP1;E9PM82;E9PQZ6;A0A5K1VW55;A0A5F9ZI37;E9PKM6;A0A5F9ZI10;H0YCB3;Q8N9N2	4;4;3;3;3;3;2;2;2;2;1;1;1;1	4;4;3;3;3;3;2;2;2;2;1;1;1;1	4;4;3;3;3;3;2;2;2;2;1;1;1;1	Activating signal cointegrator 1 complex subunit 1	ASCC1	tr|A0A5F9ZH79|A0A5F9ZH79_HUMAN Activating signal cointegrator 1 complex subunit 1 OS=Homo sapiens OX=9606 GN=ASCC1 PE=1 SV=1;tr|A0A5F9ZHP1|A0A5F9ZHP1_HUMAN Activating signal cointegrator 1 complex subunit 1 OS=Homo sapiens OX=9606 GN=ASCC1 PE=1 SV=1;tr|E9P	14	4	4	4	0	0	3	0	0	3	0	0	3	0	0	3	0	0	3	0	0	3	17.4	17.4	17.4	36.876	317	317;377;124;152;252;322;123;221;292;400;71;103;139;218	0	4.3406			By MS/MS			By MS/MS	0	0	13.6	0	0	10.7
Q9H1I8;B1AH59	Q9H1I8;B1AH59	2;1	2;1	2;1	Activating signal cointegrator 1 complex subunit 2	ASCC2	sp|Q9H1I8|ASCC2_HUMAN Activating signal cointegrator 1 complex subunit 2 OS=Homo sapiens OX=9606 GN=ASCC2 PE=1 SV=3;tr|B1AH59|B1AH59_HUMAN Activating signal cointegrator 1 complex subunit 2 (Fragment) OS=Homo sapiens OX=9606 GN=ASCC2 PE=1 SV=1	2	2	2	2	0	0	2	0	0	2	0	0	2	0	0	2	0	0	2	0	0	2	2.4	2.4	2.4	86.359	757	757;240	0.0052781	1.2062			By MS/MS			By MS/MS	0	0	2.4	0	0	2.4
K7ES22;Q9NVP2;K7EM93;K7EIL9;K7ELW9	K7ES22;Q9NVP2	3;3;1;1;1	1;1;1;1;1	1;1;1;1;1	Histone chaperone ASF1B	ASF1B	tr|K7ES22|K7ES22_HUMAN Histone chaperone ASF1B OS=Homo sapiens OX=9606 GN=ASF1B PE=1 SV=1;sp|Q9NVP2|ASF1B_HUMAN Histone chaperone ASF1B OS=Homo sapiens OX=9606 GN=ASF1B PE=1 SV=1	5	3	1	1	1	1	1	1	1	1	0	0	1	0	0	1	0	0	1	0	0	1	21.7	14	14	15.827	143	143;202;48;81;165	0	9.2668	By matching	By matching	By MS/MS	By matching	By matching	By MS/MS	7.7	7.7	14	7.7	7.7	14
P08243;F8WEJ5	P08243	3;1	3;1	3;1	Asparagine synthetase [glutamine-hydrolyzing]	ASNS	sp|P08243|ASNS_HUMAN Asparagine synthetase [glutamine-hydrolyzing] OS=Homo sapiens OX=9606 GN=ASNS PE=1 SV=4	2	3	3	3	0	0	1	0	0	2	0	0	1	0	0	2	0	0	1	0	0	2	5.7	5.7	5.7	64.369	561	561;401	0	4.8788			By MS/MS			By MS/MS	0	0	1.6	0	0	5.2
A0A7P0Z4R7;A0A7P0Z491;Q8IZT6;A0A7P0T8U9	A0A7P0Z4R7;A0A7P0Z491;Q8IZT6;A0A7P0T8U9	2;2;2;1	2;2;2;1	2;2;2;1	Abnormal spindle-like microcephaly-associated protein	ASPM	tr|A0A7P0Z4R7|A0A7P0Z4R7_HUMAN Abnormal spindle-like microcephaly-associated protein OS=Homo sapiens OX=9606 GN=ASPM PE=4 SV=1;tr|A0A7P0Z491|A0A7P0Z491_HUMAN Abnormal spindle-like microcephaly-associated protein OS=Homo sapiens OX=9606 GN=ASPM PE=4 SV=1;sp	4	2	2	2	1	1	0	1	2	1	1	1	0	1	2	1	1	1	0	1	2	1	0.8	0.8	0.8	408.94	3469	3469;3551;3477;1300	0.0091708	0.97408	By MS/MS	By MS/MS		By MS/MS	By MS/MS	By MS/MS	0.3	0.3	0	0.3	0.8	0.5
Q9NVI7;A0A5K1VW56;Q5T9A4	Q9NVI7;A0A5K1VW56;Q5T9A4	2;1;1	2;1;1	2;1;1	ATPase family AAA domain-containing protein 3A;ATPase family AAA domain-containing protein 3B	ATAD3A;ATAD3B	sp|Q9NVI7|ATD3A_HUMAN ATPase family AAA domain-containing protein 3A OS=Homo sapiens OX=9606 GN=ATAD3A PE=1 SV=2;tr|A0A5K1VW56|A0A5K1VW56_HUMAN ATPase family AAA domain-containing protein 3B OS=Homo sapiens OX=9606 GN=ATAD3B PE=1 SV=1;sp|Q5T9A4|ATD3B_HUMAN	3	2	2	2	0	0	1	0	0	1	0	0	1	0	0	1	0	0	1	0	0	1	4.1	4.1	4.1	71.368	634	634;298;648	0.00089969	1.791			By MS/MS			By MS/MS	0	0	1.7	0	0	2.4
Q9BSB4;F8VQD9;H3BMZ4;F8VVA0	Q9BSB4;F8VQD9	3;2;1;1	3;2;1;1	3;2;1;1	Autophagy-related protein 101	ATG101	sp|Q9BSB4|ATGA1_HUMAN Autophagy-related protein 101 OS=Homo sapiens OX=9606 GN=ATG101 PE=1 SV=1;tr|F8VQD9|F8VQD9_HUMAN Autophagy-related protein 101 (Fragment) OS=Homo sapiens OX=9606 GN=ATG101 PE=1 SV=1	4	3	3	3	0	0	1	0	0	2	0	0	1	0	0	2	0	0	1	0	0	2	26.1	26.1	26.1	25.002	218	218;190;84;141	0	8.1555			By MS/MS			By MS/MS	0	0	7.3	0	0	18.3
O75143;J9JIF6;H0YDR0;H0YCL5;H0YEM7	O75143;J9JIF6	4;2;1;1;1	4;2;1;1;1	4;2;1;1;1	Autophagy-related protein 13	ATG13	sp|O75143|ATG13_HUMAN Autophagy-related protein 13 OS=Homo sapiens OX=9606 GN=ATG13 PE=1 SV=1;tr|J9JIF6|J9JIF6_HUMAN Autophagy-related protein 13 (Fragment) OS=Homo sapiens OX=9606 GN=ATG13 PE=1 SV=1	5	4	4	4	0	0	3	0	0	3	0	0	3	0	0	3	0	0	3	0	0	3	10.8	10.8	10.8	56.571	517	517;198;47;78;193	0	10.253			By MS/MS			By MS/MS	0	0	8.7	0	0	7.2
F5H7B6;F5GWM4;F5GWZ9;Q8NAA4	F5H7B6;F5GWM4;F5GWZ9;Q8NAA4	1;1;1;1	1;1;1;1	1;1;1;1	Autophagy-related protein 16-2	ATG16L2	tr|F5H7B6|F5H7B6_HUMAN Protein Atg16l2 OS=Homo sapiens OX=9606 GN=ATG16L2 PE=1 SV=1;tr|F5GWM4|F5GWM4_HUMAN Protein Atg16l2 OS=Homo sapiens OX=9606 GN=ATG16L2 PE=1 SV=1;tr|F5GWZ9|F5GWZ9_HUMAN Protein Atg16l2 OS=Homo sapiens OX=9606 GN=ATG16L2 PE=1 SV=1;sp|Q	4	1	1	1	0	1	0	0	1	0	0	1	0	0	1	0	0	1	0	0	1	0	12.3	12.3	12.3	12.062	106	106;121;164;619	1	-2		By MS/MS			By MS/MS		0	12.3	0	0	12.3	0
C9JD65;Q7Z3C6	C9JD65;Q7Z3C6	1;1	1;1	1;1	Autophagy-related protein 9A	ATG9A	tr|C9JD65|C9JD65_HUMAN Autophagy-related protein 9 (Fragment) OS=Homo sapiens OX=9606 GN=ATG9A PE=1 SV=1;sp|Q7Z3C6|ATG9A_HUMAN Autophagy-related protein 9A OS=Homo sapiens OX=9606 GN=ATG9A PE=1 SV=3	2	1	1	1	1	1	0	0	0	0	1	1	0	0	0	0	1	1	0	0	0	0	10.5	10.5	10.5	15.639	133	133;839	1	-2	By MS/MS	By MS/MS					10.5	10.5	0	0	0	0
Q13315	Q13315	1	1	1	Serine-protein kinase ATM	ATM	sp|Q13315|ATM_HUMAN Serine-protein kinase ATM OS=Homo sapiens OX=9606 GN=ATM PE=1 SV=4	1	1	1	1	0	0	1	0	0	0	0	0	1	0	0	0	0	0	1	0	0	0	0.8	0.8	0.8	350.68	3056	3056	0.0056361	1.1849			By MS/MS				0	0	0.8	0	0	0
P06576;H0YH81;F8W079;F8W0P7;H0YI37	P06576;H0YH81	7;5;3;2;1	7;5;3;2;1	7;5;3;2;1	ATP synthase subunit beta, mitochondrial;ATP synthase subunit beta	ATP5B	sp|P06576|ATPB_HUMAN ATP synthase subunit beta, mitochondrial OS=Homo sapiens OX=9606 GN=ATP5F1B PE=1 SV=3;tr|H0YH81|H0YH81_HUMAN ATP synthase subunit beta (Fragment) OS=Homo sapiens OX=9606 GN=ATP5F1B PE=1 SV=1	5	7	7	7	3	1	6	2	3	5	3	1	6	2	3	5	3	1	6	2	3	5	20.6	20.6	20.6	56.559	529	529;362;284;270;133	0	26.974	By MS/MS	By MS/MS	By MS/MS	By MS/MS	By MS/MS	By MS/MS	10	3.6	17.8	7.2	9.8	14.4
P36542	P36542	3	3	3	ATP synthase subunit gamma, mitochondrial	ATP5C1	sp|P36542|ATPG_HUMAN ATP synthase subunit gamma, mitochondrial OS=Homo sapiens OX=9606 GN=ATP5F1C PE=1 SV=1	1	3	3	3	0	0	3	0	0	3	0	0	3	0	0	3	0	0	3	0	0	3	9.1	9.1	9.1	32.996	298	298	0	4.2098			By MS/MS			By MS/MS	0	0	9.1	0	0	9.1
F5H608;O75947	F5H608;O75947	2;2	2;2	2;2	ATP synthase subunit d, mitochondrial	ATP5H	tr|F5H608|F5H608_HUMAN ATP synthase subunit d, mitochondrial OS=Homo sapiens OX=9606 GN=ATP5PD PE=1 SV=2;sp|O75947|ATP5H_HUMAN ATP synthase subunit d, mitochondrial OS=Homo sapiens OX=9606 GN=ATP5PD PE=1 SV=3	2	2	2	2	0	0	2	0	0	2	0	0	2	0	0	2	0	0	2	0	0	2	40.7	40.7	40.7	8.9153	81	81;161	0	3.0383			By MS/MS			By MS/MS	0	0	40.7	0	0	40.7
P56385	P56385	1	1	1	ATP synthase subunit e, mitochondrial	ATP5I	sp|P56385|ATP5I_HUMAN ATP synthase subunit e, mitochondrial OS=Homo sapiens OX=9606 GN=ATP5ME PE=1 SV=2	1	1	1	1	1	1	1	1	1	0	1	1	1	1	1	0	1	1	1	1	1	0	18.8	18.8	18.8	7.9331	69	69	0.00088692	1.674	By MS/MS	By MS/MS	By MS/MS	By matching	By MS/MS		18.8	18.8	18.8	18.8	18.8	0
G3V325;O75127	G3V325;O75127	1;1	1;1	1;1	Pentatricopeptide repeat-containing protein 1, mitochondrial	ATP5J2-PTCD1;PTCD1	tr|G3V325|G3V325_HUMAN ATP5MF-PTCD1 readthrough OS=Homo sapiens OX=9606 GN=ATP5MF-PTCD1 PE=4 SV=1;sp|O75127|PTCD1_HUMAN Pentatricopeptide repeat-containing protein 1, mitochondrial OS=Homo sapiens OX=9606 GN=PTCD1 PE=1 SV=2	2	1	1	1	1	0	0	0	1	0	1	0	0	0	1	0	1	0	0	0	1	0	1.5	1.5	1.5	84.109	749	749;700	0.0078217	1.0682	By MS/MS				By MS/MS		1.5	0	0	0	1.5	0
P38606;C9JA17;C9JVW8	P38606	10;3;3	10;3;3	10;3;3	V-type proton ATPase catalytic subunit A	ATP6V1A	sp|P38606|VATA_HUMAN V-type proton ATPase catalytic subunit A OS=Homo sapiens OX=9606 GN=ATP6V1A PE=1 SV=2	3	10	10	10	0	0	7	0	1	6	0	0	7	0	1	6	0	0	7	0	1	6	24.1	24.1	24.1	68.303	617	617;184;221	0	87.815			By MS/MS		By MS/MS	By MS/MS	0	0	18.2	0	3.4	17.3
O14965;A3KFJ0;A3KFJ1;Q5QPD4;Q5QPD2;B4DXA6;A0A0A0MSY3;Q5Y191;Q9UQB9	O14965;A3KFJ0;A3KFJ1;Q5QPD4	5;4;3;3;2;1;1;1;1	5;4;3;3;2;1;1;1;1	4;3;2;2;2;0;0;0;0	Aurora kinase A	AURKA	sp|O14965|AURKA_HUMAN Aurora kinase A OS=Homo sapiens OX=9606 GN=AURKA PE=1 SV=2;tr|A3KFJ0|A3KFJ0_HUMAN Aurora kinase OS=Homo sapiens OX=9606 GN=AURKA PE=1 SV=1;tr|A3KFJ1|A3KFJ1_HUMAN Aurora kinase (Fragment) OS=Homo sapiens OX=9606 GN=AURKA PE=1 SV=8;tr|Q	9	5	5	4	0	0	3	0	0	3	0	0	3	0	0	3	0	0	2	0	0	2	17.6	17.6	15.6	45.809	403	403;347;188;271;146;113;274;306;309	0	9.7883			By MS/MS			By MS/MS	0	0	8.9	0	0	9.2
J3KT86;Q96GD4;J3KTD6;J3QLN8;J3KRJ2;J3QR41;J3KRF8	J3KT86;Q96GD4;J3KTD6;J3QLN8;J3KRJ2;J3QR41	4;4;3;3;2;2;1	3;3;2;2;1;1;1	3;3;2;2;1;1;1	Aurora kinase B	AURKB	tr|J3KT86|J3KT86_HUMAN Aurora kinase (Fragment) OS=Homo sapiens OX=9606 GN=AURKB PE=1 SV=1;sp|Q96GD4|AURKB_HUMAN Aurora kinase B OS=Homo sapiens OX=9606 GN=AURKB PE=1 SV=3;tr|J3KTD6|J3KTD6_HUMAN Aurora kinase (Fragment) OS=Homo sapiens OX=9606 GN=AURKB PE=	7	4	3	3	0	0	4	0	0	3	0	0	3	0	0	2	0	0	3	0	0	2	21.5	18.2	18.2	27.956	242	242;344;228;230;69;172;123	0	5.3804			By MS/MS			By MS/MS	0	0	21.5	0	0	14.9
Q9NQS1;H0YKR0	Q9NQS1	5;2	5;2	5;2	Cell death regulator Aven	AVEN	sp|Q9NQS1|AVEN_HUMAN Cell death regulator Aven OS=Homo sapiens OX=9606 GN=AVEN PE=1 SV=1	2	5	5	5	0	0	4	1	1	3	0	0	4	1	1	3	0	0	4	1	1	3	24	24	24	38.506	362	362;59	0	35.74			By MS/MS	By MS/MS	By MS/MS	By MS/MS	0	0	19.9	2.8	2.8	14.1
P25311;C9JEV0;H7BZJ8	P25311;C9JEV0;H7BZJ8	2;2;1	2;2;1	2;2;1	Zinc-alpha-2-glycoprotein	AZGP1	sp|P25311|ZA2G_HUMAN Zinc-alpha-2-glycoprotein OS=Homo sapiens OX=9606 GN=AZGP1 PE=1 SV=2;tr|C9JEV0|C9JEV0_HUMAN Zinc-alpha-2-glycoprotein OS=Homo sapiens OX=9606 GN=AZGP1 PE=1 SV=1;tr|H7BZJ8|H7BZJ8_HUMAN Zinc-alpha-2-glycoprotein (Fragment) OS=Homo sapien	3	2	2	2	0	0	0	0	0	1	0	0	0	0	0	1	0	0	0	0	0	1	11.1	11.1	11.1	34.258	298	298;227;85	0	13.932						By MS/MS	0	0	0	0	0	4
I3L0Y9;I3L2M4;B4DWA1;I3L4C2;Q9UQB8	I3L0Y9;I3L2M4;B4DWA1;I3L4C2;Q9UQB8	2;1;1;1;1	2;1;1;1;1	1;1;1;1;1	Brain-specific angiogenesis inhibitor 1-associated protein 2	BAIAP2	tr|I3L0Y9|I3L0Y9_HUMAN Brain-specific angiogenesis inhibitor 1-associated protein 2 (Fragment) OS=Homo sapiens OX=9606 GN=BAIAP2 PE=1 SV=1;tr|I3L2M4|I3L2M4_HUMAN Brain-specific angiogenesis inhibitor 1-associated protein 2 (Fragment) OS=Homo sapiens OX=960	5	2	2	1	0	0	0	0	0	1	0	0	0	0	0	1	0	0	0	0	0	1	35.4	35.4	20.8	13.623	130	130;234;375;553;552	0	3.0078						By MS/MS	0	0	0	0	0	20.8
Q9UIF8	Q9UIF8	1	1	1	Bromodomain adjacent to zinc finger domain protein 2B	BAZ2B	sp|Q9UIF8|BAZ2B_HUMAN Bromodomain adjacent to zinc finger domain protein 2B OS=Homo sapiens OX=9606 GN=BAZ2B PE=1 SV=3	1	1	1	1	1	1	0	1	1	0	1	1	0	1	1	0	1	1	0	1	1	0	0.5	0.5	0.5	240.46	2168	2168	1	-2	By MS/MS	By MS/MS		By MS/MS	By MS/MS		0.5	0.5	0	0.5	0.5	0
Q9P287	Q9P287	2	2	2	BRCA2 and CDKN1A-interacting protein	BCCIP	sp|Q9P287|BCCIP_HUMAN BRCA2 and CDKN1A-interacting protein OS=Homo sapiens OX=9606 GN=BCCIP PE=1 SV=1	1	2	2	2	0	0	2	0	0	2	0	0	2	0	0	2	0	0	2	0	0	2	9.9	9.9	9.9	35.979	314	314	0	66.023			By MS/MS			By MS/MS	0	0	9.9	0	0	9.9
H7C2V9;H7C231;Q6W2J9;H7BZ37	H7C2V9;H7C231;Q6W2J9;H7BZ37	2;2;2;1	2;2;2;1	2;2;2;1	BCL-6 corepressor	BCOR	tr|H7C2V9|H7C2V9_HUMAN BCL-6 corepressor OS=Homo sapiens OX=9606 GN=BCOR PE=1 SV=2;tr|H7C231|H7C231_HUMAN BCL-6 corepressor OS=Homo sapiens OX=9606 GN=BCOR PE=1 SV=3;sp|Q6W2J9|BCOR_HUMAN BCL-6 corepressor OS=Homo sapiens OX=9606 GN=BCOR PE=1 SV=1;tr|H7BZ37	4	2	2	2	0	0	1	0	0	1	0	0	1	0	0	1	0	0	1	0	0	1	1.6	1.6	1.6	184.65	1690	1690;1737;1755;1659	0	2.7276			By MS/MS			By matching	0	0	1	0	0	1
K7ELY9;E7EV84;Q14457	K7ELY9;E7EV84;Q14457	1;1;1	1;1;1	1;1;1	Beclin-1	BECN1	tr|K7ELY9|K7ELY9_HUMAN Beclin-1 (Fragment) OS=Homo sapiens OX=9606 GN=BECN1 PE=1 SV=1;tr|E7EV84|E7EV84_HUMAN Beclin-1 OS=Homo sapiens OX=9606 GN=BECN1 PE=1 SV=1;sp|Q14457|BECN1_HUMAN Beclin-1 OS=Homo sapiens OX=9606 GN=BECN1 PE=1 SV=2	3	1	1	1	0	0	0	0	0	0	0	0	0	0	0	0	0	0	0	0	0	0	7.4	7.4	7.4	26.784	229	229;279;450	0	8.5358							0	0	0	0	0	0
Q6PI77	Q6PI77	1	1	1	Protein BHLHb9	BHLHB9	sp|Q6PI77|BHLH9_HUMAN Protein BHLHb9 OS=Homo sapiens OX=9606 GN=BHLHB9 PE=1 SV=1	1	1	1	1	0	0	0	1	1	0	0	0	0	1	1	0	0	0	0	1	1	0	2.7	2.7	2.7	60.29	547	547	1	-2				By MS/MS	By MS/MS		0	0	0	2.7	2.7	0
C9JSJ3	C9JSJ3	1	1	1	Basic helix-loop-helix and HMG box domain-containing protein 1	BHMG1	sp|C9JSJ3|MEIOS_HUMAN Meiosis initiator protein OS=Homo sapiens OX=9606 GN=MEIOSIN PE=3 SV=2	1	1	1	1	1	1	0	0	1	0	1	1	0	0	1	0	1	1	0	0	1	0	4.1	4.1	4.1	70.197	638	638	0.00046773	2.0652	By MS/MS	By MS/MS			By MS/MS		4.1	4.1	0	0	4.1	0
U3KQF7	U3KQF7	1	1	1		BICD1	tr|U3KQF7|U3KQF7_HUMAN Protein bicaudal D homolog 1 (Fragment) OS=Homo sapiens OX=9606 GN=BICD1 PE=1 SV=1	1	1	1	1	0	0	0	0	0	0	0	0	0	0	0	0	0	0	0	0	0	0	21.7	21.7	21.7	7.626	69	69	0.0029486	1.3737							0	0	0	0	0	0
P55957	P55957	1	1	1	BH3-interacting domain death agonist;BH3-interacting domain death agonist p15;BH3-interacting domain death agonist p13;BH3-interacting domain death agonist p11	BID	sp|P55957|BID_HUMAN BH3-interacting domain death agonist OS=Homo sapiens OX=9606 GN=BID PE=1 SV=1	1	1	1	1	1	1	0	1	1	0	1	1	0	1	1	0	1	1	0	1	1	0	10.3	10.3	10.3	21.994	195	195	0	16.769	By MS/MS	By MS/MS		By MS/MS	By MS/MS		10.3	10.3	0	10.3	10.3	0
Q9NQY0;H7BYV6;E5RGB5;E5RJI6;E5RHU4	Q9NQY0;H7BYV6	3;2;1;1;1	3;2;1;1;1	3;2;1;1;1	Bridging integrator 3	BIN3	sp|Q9NQY0|BIN3_HUMAN Bridging integrator 3 OS=Homo sapiens OX=9606 GN=BIN3 PE=1 SV=1;tr|H7BYV6|H7BYV6_HUMAN Bridging integrator 3 OS=Homo sapiens OX=9606 GN=BIN3 PE=1 SV=1	5	3	3	3	0	0	1	0	0	1	0	0	1	0	0	1	0	0	1	0	0	1	14.6	14.6	14.6	29.665	253	253;205;27;63;149	0	3.1103			By MS/MS			By MS/MS	0	0	5.1	0	0	5.1
E9PMH5;Q13490;A0A087X2B2;H0YDY3;E9PI77;E9PNM6;E9PQZ9;E9PIW1	E9PMH5;Q13490;A0A087X2B2;H0YDY3	7;7;5;4;3;2;1;1	7;7;5;4;3;2;1;1	7;7;5;4;3;2;1;1	Baculoviral IAP repeat-containing protein 2	BIRC2	tr|E9PMH5|E9PMH5_HUMAN Baculoviral IAP repeat-containing protein 2 OS=Homo sapiens OX=9606 GN=BIRC2 PE=1 SV=1;sp|Q13490|BIRC2_HUMAN Baculoviral IAP repeat-containing protein 2 OS=Homo sapiens OX=9606 GN=BIRC2 PE=1 SV=2;tr|A0A087X2B2|A0A087X2B2_HUMAN Baculo	8	7	7	7	0	0	4	0	0	5	0	0	4	0	0	5	0	0	4	0	0	5	20.1	20.1	20.1	67.513	597	597;618;534;262;139;149;79;182	0	62.616			By MS/MS			By MS/MS	0	0	11.1	0	0	14.7
H3BLT4;A0A0B4J1S3;O15392	H3BLT4;A0A0B4J1S3;O15392	2;2;2	2;2;2	2;2;2	Baculoviral IAP repeat-containing protein 5	BIRC5	tr|H3BLT4|H3BLT4_HUMAN Baculoviral IAP repeat-containing protein 5 OS=Homo sapiens OX=9606 GN=BIRC5 PE=1 SV=1;tr|A0A0B4J1S3|A0A0B4J1S3_HUMAN Baculoviral IAP repeat-containing protein 5 OS=Homo sapiens OX=9606 GN=BIRC5 PE=1 SV=1;sp|O15392|BIRC5_HUMAN Baculo	3	2	2	2	0	0	2	0	0	1	0	0	2	0	0	1	0	0	2	0	0	1	10.3	10.3	10.3	18.637	165	165;142;142	0.0067327	1.1141			By MS/MS			By MS/MS	0	0	10.3	0	0	8.5
Q6ICH2;Q96AK3	Q6ICH2;Q96AK3	3;3	1;1	0;0	DNA dC->dU-editing enzyme APOBEC-3D	bK150C2.9;APOBEC3D	tr|Q6ICH2|Q6ICH2_HUMAN BK150C2.9 protein OS=Homo sapiens OX=9606 GN=APOBEC3D PE=1 SV=1;sp|Q96AK3|ABC3D_HUMAN DNA dC->dU-editing enzyme APOBEC-3D OS=Homo sapiens OX=9606 GN=APOBEC3D PE=1 SV=1	2	3	1	0	0	0	3	0	1	3	0	0	1	0	0	1	0	0	0	0	0	0	19.3	5.9	0	24.151	202	202;386	0.00089366	1.74			By MS/MS		By matching	By MS/MS	0	0	19.3	0	5.4	19.3
K7ES02;Q13867;J3KS79;K7ENH5;K7ESE8;J3KSD8	K7ES02;Q13867;J3KS79;K7ENH5	3;3;2;2;1;1	3;3;2;2;1;1	3;3;2;2;1;1	Bleomycin hydrolase	BLMH	tr|K7ES02|K7ES02_HUMAN Bleomycin hydrolase (Fragment) OS=Homo sapiens OX=9606 GN=BLMH PE=1 SV=1;sp|Q13867|BLMH_HUMAN Bleomycin hydrolase OS=Homo sapiens OX=9606 GN=BLMH PE=1 SV=1;tr|J3KS79|J3KS79_HUMAN Bleomycin hydrolase OS=Homo sapiens OX=9606 GN=BLMH PE	6	3	3	3	0	0	1	0	0	2	0	0	1	0	0	2	0	0	1	0	0	2	17.9	17.9	17.9	37.198	318	318;455;71;93;231;262	0	3.847			By MS/MS			By MS/MS	0	0	3.5	0	0	9.7
Q6QNY0;K7EN58	Q6QNY0;K7EN58	2;1	2;1	2;1	Biogenesis of lysosome-related organelles complex 1 subunit 3	BLOC1S3	sp|Q6QNY0|BL1S3_HUMAN Biogenesis of lysosome-related organelles complex 1 subunit 3 OS=Homo sapiens OX=9606 GN=BLOC1S3 PE=1 SV=1;tr|K7EN58|K7EN58_HUMAN Biogenesis of lysosome-related organelles complex 1 subunit 3 (Fragment) OS=Homo sapiens OX=9606 GN=BLOC	2	2	2	2	0	0	1	0	1	1	0	0	1	0	1	1	0	0	1	0	1	1	18.8	18.8	18.8	21.255	202	202;78	0	4.3571			By MS/MS		By matching	By MS/MS	0	0	7.9	0	10.9	7.9
Q9NUP1	Q9NUP1	2	2	2	Biogenesis of lysosome-related organelles complex 1 subunit 4	BLOC1S4	sp|Q9NUP1|BL1S4_HUMAN Biogenesis of lysosome-related organelles complex 1 subunit 4 OS=Homo sapiens OX=9606 GN=BLOC1S4 PE=1 SV=1	1	2	2	2	0	0	2	0	0	0	0	0	2	0	0	0	0	0	2	0	0	0	12.4	12.4	12.4	23.351	217	217	0.0025718	1.446			By MS/MS				0	0	12.4	0	0	0
A0A0D9SEU2;A0A0A0MTN6;G5E931;H3BN57;Q8TDH9	A0A0D9SEU2;A0A0A0MTN6;G5E931;H3BN57;Q8TDH9	1;1;1;1;1	1;1;1;1;1	1;1;1;1;1	Biogenesis of lysosome-related organelles complex 1 subunit 5	BLOC1S5;BLOC1S5-TXNDC5	tr|A0A0D9SEU2|A0A0D9SEU2_HUMAN Biogenesis of lysosome-related organelles complex 1 subunit 5 OS=Homo sapiens OX=9606 GN=BLOC1S5 PE=1 SV=1;tr|A0A0A0MTN6|A0A0A0MTN6_HUMAN Biogenesis of lysosome-related organelles complex 1 subunit 5 OS=Homo sapiens OX=9606 G	5	1	1	1	0	1	0	0	1	1	0	1	0	0	1	1	0	1	0	0	1	1	32.4	32.4	32.4	7.2239	68	68;90;114;136;187	0.0067273	1.1136		By matching			By MS/MS	By MS/MS	0	32.4	0	0	32.4	32.4
P53004;C9J1E1	P53004	5;2	5;2	5;2	Biliverdin reductase A	BLVRA	sp|P53004|BIEA_HUMAN Biliverdin reductase A OS=Homo sapiens OX=9606 GN=BLVRA PE=1 SV=2	2	5	5	5	0	0	1	0	0	1	0	0	1	0	0	1	0	0	1	0	0	1	26.7	26.7	26.7	33.428	296	296;102	0	6.3371			By MS/MS			By MS/MS	0	0	3.4	0	0	3.4
Q14137;A0A075B729	Q14137	6;1	6;1	6;1	Ribosome biogenesis protein BOP1	BOP1	sp|Q14137|BOP1_HUMAN Ribosome biogenesis protein BOP1 OS=Homo sapiens OX=9606 GN=BOP1 PE=1 SV=2	2	6	6	6	0	0	4	0	0	4	0	0	4	0	0	4	0	0	4	0	0	4	10.7	10.7	10.7	83.629	746	746;217	0	19.343			By MS/MS			By MS/MS	0	0	8.6	0	0	7.2
A0A087WZR3	A0A087WZR3	7	1	1		BRCC3	tr|A0A087WZR3|A0A087WZR3_HUMAN Lys-63-specific deubiquitinase OS=Homo sapiens OX=9606 GN=BRCC3 PE=1 SV=1	1	7	1	1	0	0	3	0	1	6	0	0	0	0	0	1	0	0	0	0	0	1	27	7.2	7.2	33.404	293	293	0.0033487	1.333			By matching		By matching	By MS/MS	0	0	13.3	0	4.1	23.5
H0Y6K2;A0A140T9E9;A0A0G2JK44;P25440;A0A0G2JHN8;A0A140T9I1;U3KQA6;A0A0G2JHL0;A0A140T9F7;A0A140T9V2;O60885	H0Y6K2;A0A140T9E9;A0A0G2JK44;P25440;A0A0G2JHN8;A0A140T9I1	5;5;5;5;4;4;1;1;1;1;1	5;5;5;5;4;4;1;1;1;1;1	5;5;5;5;4;4;1;1;1;1;1	Bromodomain-containing protein 2	BRD2	tr|H0Y6K2|H0Y6K2_HUMAN Bromodomain-containing protein 2 (Fragment) OS=Homo sapiens OX=9606 GN=BRD2 PE=1 SV=1;tr|A0A140T9E9|A0A140T9E9_HUMAN Bromodomain-containing protein 2 (Fragment) OS=Homo sapiens OX=9606 GN=BRD2 PE=1 SV=1;tr|A0A0G2JK44|A0A0G2JK44_HUMAN	11	5	5	5	3	1	0	1	5	2	3	1	0	1	5	2	3	1	0	1	5	2	6.2	6.2	6.2	88.288	807	807;807;836;801;328;363;552;613;619;648;1362	0	6.2238	By MS/MS	By matching		By matching	By MS/MS	By MS/MS	4.5	1	0	1	6.2	3
Q15059	Q15059	1	1	1	Bromodomain-containing protein 3	BRD3	sp|Q15059|BRD3_HUMAN Bromodomain-containing protein 3 OS=Homo sapiens OX=9606 GN=BRD3 PE=1 SV=1	1	1	1	1	1	0	0	0	1	0	1	0	0	0	1	0	1	0	0	0	1	0	2.2	2.2	2.2	79.541	726	726	0.0091848	0.97797	By matching				By MS/MS		2.2	0	0	0	2.2	0
A0A7P0T8B0;C9JJU3;A0A7P0TAQ7;Q58F21	A0A7P0T8B0;C9JJU3;A0A7P0TAQ7;Q58F21	1;1;1;1	1;1;1;1	1;1;1;1	Bromodomain testis-specific protein	BRDT	tr|A0A7P0T8B0|A0A7P0T8B0_HUMAN Bromodomain testis-specific protein (Fragment) OS=Homo sapiens OX=9606 GN=BRDT PE=4 SV=1;tr|C9JJU3|C9JJU3_HUMAN Bromodomain testis-specific protein (Fragment) OS=Homo sapiens OX=9606 GN=BRDT PE=1 SV=1;tr|A0A7P0TAQ7|A0A7P0TAQ7	4	1	1	1	0	0	1	0	1	1	0	0	1	0	1	1	0	0	1	0	1	1	6.7	6.7	6.7	39.059	345	345;462;475;947	1	-2			By matching		By MS/MS	By matching	0	0	6.7	0	6.7	6.7
F8W6C6;E9PNA9;Q9NW68	F8W6C6;E9PNA9;Q9NW68	1;1;1	1;1;1	1;1;1	BSD domain-containing protein 1	BSDC1	tr|F8W6C6|F8W6C6_HUMAN BSD domain-containing protein 1 OS=Homo sapiens OX=9606 GN=BSDC1 PE=1 SV=1;tr|E9PNA9|E9PNA9_HUMAN BSD domain-containing protein 1 OS=Homo sapiens OX=9606 GN=BSDC1 PE=1 SV=1;sp|Q9NW68|BSDC1_HUMAN BSD domain-containing protein 1 OS=Hom	3	1	1	1	0	0	0	0	0	1	0	0	0	0	0	1	0	0	0	0	0	1	42.2	42.2	42.2	7.221	64	64;89;430	0	2.5265						By MS/MS	0	0	0	0	0	42.2
I3L192;A0A7P0TB04;A0A7P0TA85;P35613;R4GN83;R4GMX5;A0A2R8YDZ0;A0A087WUV8;A0A7P0T8A7	I3L192;A0A7P0TB04;A0A7P0TA85;P35613;R4GN83;R4GMX5;A0A2R8YDZ0;A0A087WUV8;A0A7P0T8A7	2;2;2;2;1;1;1;1;1	2;2;2;2;1;1;1;1;1	2;2;2;2;1;1;1;1;1	Basigin	BSG	tr|I3L192|I3L192_HUMAN Basigin (Fragment) OS=Homo sapiens OX=9606 GN=BSG PE=1 SV=8;tr|A0A7P0TB04|A0A7P0TB04_HUMAN Basigin OS=Homo sapiens OX=9606 GN=BSG PE=4 SV=1;tr|A0A7P0TA85|A0A7P0TA85_HUMAN Basigin OS=Homo sapiens OX=9606 GN=BSG PE=4 SV=1;sp|P35613|BAS	9	2	2	2	1	2	1	1	1	1	1	2	1	1	1	1	1	2	1	1	1	1	16.2	16.2	16.2	17.247	160	160;266;266;385;52;84;103;189;206	0.0021815	1.5594	By MS/MS	By MS/MS	By MS/MS	By MS/MS	By MS/MS	By MS/MS	7.5	16.2	8.8	7.5	7.5	7.5
A0A0A0MTH9;O14981	A0A0A0MTH9;O14981	1;1	1;1	1;1	TATA-binding protein-associated factor 172	BTAF1	tr|A0A0A0MTH9|A0A0A0MTH9_HUMAN TATA-binding protein-associated factor 172 OS=Homo sapiens OX=9606 GN=BTAF1 PE=1 SV=1;sp|O14981|BTAF1_HUMAN TATA-binding protein-associated factor 172 OS=Homo sapiens OX=9606 GN=BTAF1 PE=1 SV=2	2	1	1	1	0	0	1	0	0	1	0	0	1	0	0	1	0	0	1	0	0	1	1.3	1.3	1.3	206.93	1849	1849;1849	0.007773	1.0462			By matching			By MS/MS	0	0	1.3	0	0	1.3
O43684;J3QT28;J3QSX4	O43684;J3QT28	3;3;1	3;3;1	3;3;1	Mitotic checkpoint protein BUB3	BUB3	sp|O43684|BUB3_HUMAN Mitotic checkpoint protein BUB3 OS=Homo sapiens OX=9606 GN=BUB3 PE=1 SV=1;tr|J3QT28|J3QT28_HUMAN Mitotic checkpoint protein BUB3 (Fragment) OS=Homo sapiens OX=9606 GN=BUB3 PE=1 SV=1	3	3	3	3	0	0	2	0	0	2	0	0	2	0	0	2	0	0	2	0	0	2	13.1	13.1	13.1	37.154	328	328;278;145	0	5.0724			By MS/MS			By MS/MS	0	0	9.1	0	0	8.2
C9IZ80;Q7L1Q6	C9IZ80;Q7L1Q6	1;1	1;1	1;1	Basic leucine zipper and W2 domain-containing protein 1	BZW1	tr|C9IZ80|C9IZ80_HUMAN Basic leucine zipper and W2 domain-containing protein 1 (Fragment) OS=Homo sapiens OX=9606 GN=BZW1 PE=1 SV=1;sp|Q7L1Q6|BZW1_HUMAN Basic leucine zipper and W2 domain-containing protein 1 OS=Homo sapiens OX=9606 GN=BZW1 PE=1 SV=1	2	1	1	1	0	0	0	0	0	0	0	0	0	0	0	0	0	0	0	0	0	0	5.1	5.1	5.1	33.454	294	294;419	0	2.9045							0	0	0	0	0	0
E9PFD4;B5MCE7;Q75MG1;B5MCH7;E7ETZ4;Q9Y6E2	E9PFD4;B5MCE7;Q75MG1;B5MCH7;E7ETZ4;Q9Y6E2	2;2;2;2;2;2	2;2;2;2;2;2	2;2;2;2;2;2	Basic leucine zipper and W2 domain-containing protein 2	BZW2	tr|E9PFD4|E9PFD4_HUMAN BZW2 protein OS=Homo sapiens OX=9606 GN=BZW2 PE=1 SV=2;tr|B5MCE7|B5MCE7_HUMAN Basic leucine zipper and W2 domain-containing protein 2 OS=Homo sapiens OX=9606 GN=BZW2 PE=1 SV=1;tr|Q75MG1|Q75MG1_HUMAN Basic leucine zipper and W2 domain	6	2	2	2	0	0	2	0	0	2	0	0	2	0	0	2	0	0	2	0	0	2	12.7	12.7	12.7	21.511	189	189;225;274;343;408;419	0	3.6638			By MS/MS			By MS/MS	0	0	12.7	0	0	12.7
D3DRR9;Q86WR7	D3DRR9;Q86WR7	1;1	1;1	1;1	Proline and serine-rich protein 2	C10orf47;PROSER2	tr|D3DRR9|D3DRR9_HUMAN Chromosome 10 open reading frame 47, isoform CRA_b OS=Homo sapiens OX=9606 GN=PROSER2 PE=1 SV=1;sp|Q86WR7|PRSR2_HUMAN Proline and serine-rich protein 2 OS=Homo sapiens OX=9606 GN=PROSER2 PE=1 SV=2	2	1	1	1	0	0	1	0	0	1	0	0	1	0	0	1	0	0	1	0	0	1	6.7	6.7	6.7	24.792	239	239;435	0.0081019	1.0209			By MS/MS			By MS/MS	0	0	6.7	0	0	6.7
E9PQS1;A0A087WT99;A0A1W2PRB8;Q9H0W9;E9PR95;E9PSC3;E9PLC5;E9PLB3;E9PIP1;E9PPB5;E9PJU8	E9PQS1;A0A087WT99;A0A1W2PRB8;Q9H0W9;E9PR95;E9PSC3;E9PLC5;E9PLB3;E9PIP1;E9PPB5;E9PJU8	2;2;2;2;1;1;1;1;1;1;1	2;2;2;2;1;1;1;1;1;1;1	2;2;2;2;1;1;1;1;1;1;1	Ester hydrolase C11orf54	C11orf54	tr|E9PQS1|E9PQS1_HUMAN Ester hydrolase C11orf54 (Fragment) OS=Homo sapiens OX=9606 GN=C11orf54 PE=1 SV=1;tr|A0A087WT99|A0A087WT99_HUMAN Ester hydrolase C11orf54 OS=Homo sapiens OX=9606 GN=C11orf54 PE=1 SV=1;tr|A0A1W2PRB8|A0A1W2PRB8_HUMAN Cofactor required	11	2	2	2	0	0	2	0	0	2	0	0	2	0	0	2	0	0	2	0	0	2	12.1	12.1	12.1	26.333	239	239;256;838;315;76;95;100;149;171;185;187	0	2.4751			By MS/MS			By MS/MS	0	0	12.1	0	0	12.1
E9PPH4;B4DYW4;A0A7I2V427;A0A7I2V5I0;Q86VG3	E9PPH4;B4DYW4;A0A7I2V427;A0A7I2V5I0;Q86VG3	1;1;1;1;1	1;1;1;1;1	1;1;1;1;1	Uncharacterized protein C11orf74	C11orf74	tr|E9PPH4|E9PPH4_HUMAN Intraflagellar transport-associated protein (Fragment) OS=Homo sapiens OX=9606 GN=IFTAP PE=1 SV=1;tr|B4DYW4|B4DYW4_HUMAN Intraflagellar transport-associated protein OS=Homo sapiens OX=9606 GN=IFTAP PE=1 SV=1;tr|A0A7I2V427|A0A7I2V427_	5	1	1	1	0	0	1	0	0	0	0	0	1	0	0	0	0	0	1	0	0	0	19.3	19.3	19.3	9.6335	83	83;109;123;196;221	0	7.5015			By MS/MS				0	0	19.3	0	0	0
A0A087WW59;Q7Z7L8	A0A087WW59;Q7Z7L8	1;1	1;1	1;1	Uncharacterized protein C11orf96	C11orf96	tr|A0A087WW59|A0A087WW59_HUMAN Uncharacterized protein C11orf96 OS=Homo sapiens OX=9606 GN=C11orf96 PE=1 SV=1;sp|Q7Z7L8|CK096_HUMAN Uncharacterized protein C11orf96 OS=Homo sapiens OX=9606 GN=C11orf96 PE=1 SV=3	2	1	1	1	0	0	0	0	0	0	0	0	0	0	0	0	0	0	0	0	0	0	9	9	9	13.773	122	122;435	0.0021626	1.5046							0	0	0	0	0	0
Q8N999	Q8N999	4	4	4	Uncharacterized protein C12orf29	C12orf29	sp|Q8N999|CL029_HUMAN Uncharacterized protein C12orf29 OS=Homo sapiens OX=9606 GN=C12orf29 PE=1 SV=2	1	4	4	4	0	0	0	0	0	1	0	0	0	0	0	1	0	0	0	0	0	1	9.8	9.8	9.8	37.49	325	325	0	4.3044						By matching	0	0	0	0	0	2.5
Q86WS4	Q86WS4	1	1	1	Uncharacterized protein C12orf40	C12orf40	sp|Q86WS4|CL040_HUMAN Uncharacterized protein C12orf40 OS=Homo sapiens OX=9606 GN=C12orf40 PE=1 SV=3	1	1	1	1	0	0	1	0	1	1	0	0	1	0	1	1	0	0	1	0	1	1	1.8	1.8	1.8	74.504	652	652	1	-2			By MS/MS		By matching	By MS/MS	0	0	1.8	0	1.8	1.8
A0A087WT30;Q8N5I9	A0A087WT30;Q8N5I9	2;2	2;2	2;2	Uncharacterized protein C12orf45	C12orf45	tr|A0A087WT30|A0A087WT30_HUMAN NOP protein chaperone 1 OS=Homo sapiens OX=9606 GN=NOPCHAP1 PE=1 SV=2;sp|Q8N5I9|NOPC1_HUMAN NOP protein chaperone 1 OS=Homo sapiens OX=9606 GN=NOPCHAP1 PE=1 SV=2	2	2	2	2	0	0	1	0	0	1	0	0	1	0	0	1	0	0	1	0	0	1	13.3	13.3	13.3	23.066	211	211;185	0.00088849	1.6975			By MS/MS			By MS/MS	0	0	7.6	0	0	5.7
F5GXW5;U3KQ07;Q99622	F5GXW5;U3KQ07;Q99622	1;1;1	1;1;1	1;1;1	Protein C10	C12orf57	tr|F5GXW5|F5GXW5_HUMAN Protein C10 OS=Homo sapiens OX=9606 GN=C12orf57 PE=1 SV=1;tr|U3KQ07|U3KQ07_HUMAN Protein C10 OS=Homo sapiens OX=9606 GN=C12orf57 PE=1 SV=1;sp|Q99622|C10_HUMAN Protein C10 OS=Homo sapiens OX=9606 GN=C12orf57 PE=1 SV=1	3	1	1	1	0	0	1	0	0	1	0	0	1	0	0	1	0	0	1	0	0	1	18.6	18.6	18.6	9.9953	97	97;103;126	0	4.8865			By MS/MS			By MS/MS	0	0	18.6	0	0	18.6
H3BS73;H3BRT2;H3BNB2;A0A087WYU2;Q96S19;H3BQ55;H3BNT3;H3BMF3	H3BS73;H3BRT2;H3BNB2;A0A087WYU2;Q96S19;H3BQ55;H3BNT3;H3BMF3	2;2;2;2;2;1;1;1	2;2;2;2;2;1;1;1	2;2;2;2;2;1;1;1	UPF0585 protein C16orf13	C16orf13	tr|H3BS73|H3BS73_HUMAN Methyltransferase-like 26 OS=Homo sapiens OX=9606 GN=METTL26 PE=1 SV=1;tr|H3BRT2|H3BRT2_HUMAN Methyltransferase-like 26 (Fragment) OS=Homo sapiens OX=9606 GN=METTL26 PE=1 SV=1;tr|H3BNB2|H3BNB2_HUMAN Methyltransferase-like 26 (Fragmen	8	2	2	2	0	0	0	0	0	0	0	0	0	0	0	0	0	0	0	0	0	0	24.3	24.3	24.3	11.138	103	103;133;174;184;204;161;162;176	0	2.5918							0	0	0	0	0	0
K7EQ65	K7EQ65	1	1	1		C18orf8	tr|K7EQ65|K7EQ65_HUMAN Regulator of MON1-CCZ1 complex OS=Homo sapiens OX=9606 GN=RMC1 PE=1 SV=1	1	1	1	1	0	0	1	0	0	1	0	0	1	0	0	1	0	0	1	0	0	1	5.8	5.8	5.8	17.415	154	154	1	-2			By MS/MS			By MS/MS	0	0	5.8	0	0	5.8
A0A087WUX7;V9GYT8;V9GYI2;V9GY35;V9GYN4;V9GYQ8;Q9NX04	A0A087WUX7;V9GYT8;V9GYI2;V9GY35;V9GYN4;V9GYQ8;Q9NX04	1;1;1;1;1;1;1	1;1;1;1;1;1;1	1;1;1;1;1;1;1	Uncharacterized protein C1orf109	C1orf109	tr|A0A087WUX7|A0A087WUX7_HUMAN Uncharacterized protein C1orf109 (Fragment) OS=Homo sapiens OX=9606 GN=C1orf109 PE=1 SV=6;tr|V9GYT8|V9GYT8_HUMAN Uncharacterized protein C1orf109 (Fragment) OS=Homo sapiens OX=9606 GN=C1orf109 PE=1 SV=7;tr|V9GYI2|V9GYI2_HUMAN	7	1	1	1	0	0	1	0	0	1	0	0	1	0	0	1	0	0	1	0	0	1	40.5	40.5	40.5	4.2569	37	37;91;113;142;151;191;203	0.0029573	1.3833			By MS/MS			By MS/MS	0	0	40.5	0	0	40.5
Q3ZCV2	Q3ZCV2	1	1	1	Uncharacterized protein C1orf177	C1orf177	sp|Q3ZCV2|LEXM_HUMAN Lymphocyte expansion molecule OS=Homo sapiens OX=9606 GN=LEXM PE=2 SV=4	1	1	1	1	1	1	0	1	0	0	1	1	0	1	0	0	1	1	0	1	0	0	4.5	4.5	4.5	47.583	418	418	1	-2	By MS/MS	By MS/MS		By MS/MS			4.5	4.5	0	4.5	0	0
Q9H425;E5RI90;E5RFY9	Q9H425;E5RI90	6;4;1	6;4;1	6;4;1	Uncharacterized protein C1orf198	C1orf198	sp|Q9H425|CA198_HUMAN Uncharacterized protein C1orf198 OS=Homo sapiens OX=9606 GN=C1orf198 PE=1 SV=1;tr|E5RI90|E5RI90_HUMAN Uncharacterized protein C1orf198 (Fragment) OS=Homo sapiens OX=9606 GN=C1orf198 PE=1 SV=1	3	6	6	6	0	0	4	0	1	5	0	0	4	0	1	5	0	0	4	0	1	5	30.3	30.3	30.3	36.346	327	327;160;110	0	11.342			By MS/MS		By MS/MS	By MS/MS	0	0	18	0	5.8	23.9
Q07021;I3L3Q7;I3L3B0	Q07021;I3L3Q7;I3L3B0	5;4;4	5;4;4	5;4;4	Complement component 1 Q subcomponent-binding protein, mitochondrial	C1QBP	sp|Q07021|C1QBP_HUMAN Complement component 1 Q subcomponent-binding protein, mitochondrial OS=Homo sapiens OX=9606 GN=C1QBP PE=1 SV=1;tr|I3L3Q7|I3L3Q7_HUMAN Complement component 1 Q subcomponent-binding protein, mitochondrial (Fragment) OS=Homo sapiens OX=	3	5	5	5	2	1	4	1	1	4	2	1	4	1	1	4	2	1	4	1	1	4	33.7	33.7	33.7	31.362	282	282;177;178	0	103.72	By MS/MS	By MS/MS	By MS/MS	By MS/MS	By MS/MS	By MS/MS	18.8	9.6	28.7	9.6	9.6	24.5
Q9GZN8;H7BYU9	Q9GZN8;H7BYU9	2;1	2;1	2;1	UPF0687 protein C20orf27	C20orf27	sp|Q9GZN8|CT027_HUMAN UPF0687 protein C20orf27 OS=Homo sapiens OX=9606 GN=C20orf27 PE=1 SV=3;tr|H7BYU9|H7BYU9_HUMAN UPF0687 protein C20orf27 (Fragment) OS=Homo sapiens OX=9606 GN=C20orf27 PE=1 SV=1	2	2	2	2	0	0	2	0	0	2	0	0	2	0	0	2	0	0	2	0	0	2	13.8	13.8	13.8	19.291	174	174;127	0.00045434	1.8614			By MS/MS			By MS/MS	0	0	13.8	0	0	13.8
P57076;H7C2R6;C9JX57;D3DSE6;C9J818;A0A669KBI0;A0A669KAZ0;H7BZW1;A0A669KAW7;A0A5F9ZHZ7;A0A669KAW9;A0A669KAY3;Q9NX33;A0A669KBG3;A0A669KAZ9;F8VZ95	P57076;H7C2R6;C9JX57;D3DSE6;C9J818;A0A669KBI0;A0A669KAZ0;H7BZW1;A0A669KAW7;A0A5F9ZHZ7;A0A669KAW9;A0A669KAY3	3;2;2;2;2;2;2;2;2;2;2;2;1;1;1;1	3;2;2;2;2;2;2;2;2;2;2;2;1;1;1;1	3;2;2;2;2;2;2;2;2;2;2;2;1;1;1;1	UPF0769 protein C21orf59	C21orf59	sp|P57076|CF298_HUMAN Cilia- and flagella-associated protein 298 OS=Homo sapiens OX=9606 GN=CFAP298 PE=1 SV=1;tr|H7C2R6|H7C2R6_HUMAN Cilia- and flagella-associated protein 298 (Fragment) OS=Homo sapiens OX=9606 GN=CFAP298 PE=3 SV=1;tr|C9JX57|C9JX57_HUMAN C	16	3	3	3	0	0	1	1	1	2	0	0	1	1	1	2	0	0	1	1	1	2	18.6	18.6	18.6	33.224	290	290;117;183;245;258;267;291;297;317;346;373;389;138;189;191;252	0	24.333			By MS/MS	By MS/MS	By MS/MS	By MS/MS	0	0	3.8	9	9	12.8
Q86YS7;H0YGU7	Q86YS7;H0YGU7	2;1	2;1	2;1	C2 domain-containing protein 5	C2CD5	sp|Q86YS7|C2CD5_HUMAN C2 domain-containing protein 5 OS=Homo sapiens OX=9606 GN=C2CD5 PE=1 SV=1;tr|H0YGU7|H0YGU7_HUMAN C2 domain-containing protein 5 (Fragment) OS=Homo sapiens OX=9606 GN=C2CD5 PE=1 SV=1	2	2	2	2	0	0	1	0	0	1	0	0	1	0	0	1	0	0	1	0	0	1	3.7	3.7	3.7	110.45	1000	1000;182	0	4.1816			By matching			By MS/MS	0	0	1.2	0	0	2.5
Q8N8J7	Q8N8J7	1	1	1	Uncharacterized protein C4orf32	C4orf32	sp|Q8N8J7|F241A_HUMAN Uncharacterized protein FAM241A OS=Homo sapiens OX=9606 GN=FAM241A PE=2 SV=2	1	1	1	1	0	0	0	0	0	0	0	0	0	0	0	0	0	0	0	0	0	0	8.3	8.3	8.3	14.652	132	132	1	-2							0	0	0	0	0	0
Q5TEZ5	Q5TEZ5	1	1	1	Uncharacterized protein C6orf163	C6orf163	sp|Q5TEZ5|CF163_HUMAN Uncharacterized protein C6orf163 OS=Homo sapiens OX=9606 GN=C6orf163 PE=4 SV=2	1	1	1	1	0	0	0	0	0	1	0	0	0	0	0	1	0	0	0	0	0	1	3.6	3.6	3.6	38.553	329	329	1	-2						By MS/MS	0	0	0	0	0	3.6
A0A3B3IRR6;A0A3B3IT54;A0A3B3ITA3;Q9H7E9	A0A3B3IRR6;A0A3B3IT54;A0A3B3ITA3;Q9H7E9	1;1;1;1	1;1;1;1	1;1;1;1	UPF0488 protein C8orf33	C8orf33	tr|A0A3B3IRR6|A0A3B3IRR6_HUMAN UPF0488 protein C8orf33 OS=Homo sapiens OX=9606 GN=C8orf33 PE=1 SV=1;tr|A0A3B3IT54|A0A3B3IT54_HUMAN UPF0488 protein C8orf33 OS=Homo sapiens OX=9606 GN=C8orf33 PE=1 SV=1;tr|A0A3B3ITA3|A0A3B3ITA3_HUMAN UPF0488 protein C8orf33 O	4	1	1	1	0	0	0	0	0	1	0	0	0	0	0	1	0	0	0	0	0	1	7.1	7.1	7.1	24.465	226	226;236;248;229	0	3.0293						By MS/MS	0	0	0	0	0	7.1
Q5T280;R4GNG4	Q5T280;R4GNG4	2;1	2;1	2;1	Putative methyltransferase C9orf114	C9orf114	sp|Q5T280|CI114_HUMAN Putative methyltransferase C9orf114 OS=Homo sapiens OX=9606 GN=SPOUT1 PE=1 SV=3;tr|R4GNG4|R4GNG4_HUMAN Putative methyltransferase C9orf114 (Fragment) OS=Homo sapiens OX=9606 GN=SPOUT1 PE=1 SV=1	2	2	2	2	0	0	1	0	0	1	0	0	1	0	0	1	0	0	1	0	0	1	6.6	6.6	6.6	42.008	376	376;87	0	2.8437			By MS/MS			By MS/MS	0	0	3.5	0	0	3.5
Q8IXQ3	Q8IXQ3	2	2	2	Uncharacterized protein C9orf40	C9orf40	sp|Q8IXQ3|CI040_HUMAN Uncharacterized protein C9orf40 OS=Homo sapiens OX=9606 GN=C9orf40 PE=1 SV=1	1	2	2	2	1	0	1	1	1	2	1	0	1	1	1	2	1	0	1	1	1	2	14.9	14.9	14.9	21.063	194	194	0	3.722	By matching		By MS/MS	By matching	By matching	By MS/MS	6.7	0	6.7	6.7	6.7	14.9
Q8N4J0;Q5T8U9;Q5T8V1	Q8N4J0;Q5T8U9;Q5T8V1	5;4;3	5;4;3	5;4;3	UPF0586 protein C9orf41	C9orf41	sp|Q8N4J0|CARME_HUMAN Carnosine N-methyltransferase OS=Homo sapiens OX=9606 GN=CARNMT1 PE=1 SV=1;tr|Q5T8U9|Q5T8U9_HUMAN Carnosine N-methyltransferase OS=Homo sapiens OX=9606 GN=CARNMT1 PE=1 SV=1;tr|Q5T8V1|Q5T8V1_HUMAN Carnosine N-methyltransferase (Fragmen	3	5	5	5	0	0	3	0	0	2	0	0	3	0	0	2	0	0	3	0	0	2	10.3	10.3	10.3	47.185	409	409;153;238	0	4.3716			By MS/MS			By MS/MS	0	0	9.8	0	0	7.1
P00918;E5RID5;E5RK37	P00918	3;1;1	3;1;1	3;1;1	Carbonic anhydrase 2	CA2	sp|P00918|CAH2_HUMAN Carbonic anhydrase 2 OS=Homo sapiens OX=9606 GN=CA2 PE=1 SV=2	3	3	3	3	0	0	3	0	0	3	0	0	3	0	0	3	0	0	3	0	0	3	17.7	17.7	17.7	29.246	260	260;97;101	0	2.8942			By MS/MS			By MS/MS	0	0	17.7	0	0	17.7
A0A1B0GVP7;A0A1B0GTN2;A0A1B0GTK1;A0A1B0GVF0;A0A1B0GTP6;A0A1B0GUK4;A0A1B0GVB2;A0A1B0GVU5;A0A1B0GTX8;A0A1B0GTS4;A0A1B0GU53;A0A1B0GTX2;E7EN11;A0A1B0GTF6;A0A1B0GTA9;A0A1B0GTN8;A0A1B0GXG0;H0Y476;A0A1C7CYX2;A0A1B0GWF9;A0A1B0GUM9;A0A1B0GU05;A0A1B0GWG5;A0A1B0GUU8;A0A1B0GW58;C9J224;A0A1B0GUJ7;A0A1B0GU32;A0A1B0GVG1;A0A1B0GTX6;A0A1B0GUK3;A0A1B0GV16;A0A1B0GUI5;E7DBM8;A0A1B0GUW8;A0A1B0GVT6;A0A1B0GTH0;A0A1B0GU…	A0A1B0GVP7;A0A1B0GTN2;A0A1B0GTK1;A0A1B0GVF0;A0A1B0GTP6;A0A1B0GUK4;A0A1B0GVB2;A0A1B0GVU5;A0A1B0GTX8;A0A1B0GTS4;A0A1B0GU53;A0A1B0GTX2;E7EN11;A0A1B0GTF6;A0A1B0GTA9;A0A1B0GTN8;A0A1B0GXG0;H0Y476;A0A1C7CYX2;A0A1B0GWF9;A0A1B0GUM9;A0A1B0GU05;A0A1B0GWG5;A0A1B0GUU8;A0A1B0GW58;C9J224;A0A1B0GUJ7;A0A1B0GU32;A0A1B0GVG1;A0A1B0GTX6;A0A1B0GUK3;A0A1B0GV16;A0A1B0GUI5;E7DBM8;A0A1B0GUW8;A0A1B0GVT6;A0A1B0GTH0;A0A1B0GU…	1;1;1;1;1;1;1;1;1;1;1;1;1;1;1;1;1;1;1;1;1;1;1;1;1;1;1;1;1;1;1;1;1;1;1;1;1;1;1;1	1;1;1;1;1;1;1;1;1;1;1;1;1;1;1;1;1;1;1;1;1;1;1;1;1;1;1;1;1;1;1;1;1;1;1;1;1;1;1;1	1;1;1;1;1;1;1;1;1;1;1;1;1;1;1;1;1;1;1;1;1;1;1;1;1;1;1;1;1;1;1;1;1;1;1;1;1;1;1;1	Voltage-dependent L-type calcium channel subunit beta-4	CACNB4	tr|A0A1B0GVP7|A0A1B0GVP7_HUMAN Voltage-dependent L-type calcium channel subunit beta-4 (Fragment) OS=Homo sapiens OX=9606 GN=CACNB4 PE=1 SV=1;tr|A0A1B0GTN2|A0A1B0GTN2_HUMAN Voltage-dependent L-type calcium channel subunit beta-4 (Fragment) OS=Homo sapiens	40	1	1	1	0	0	0	0	0	0	0	0	0	0	0	0	0	0	0	0	0	0	15.2	15.2	15.2	8.194	79	79;110;423;351;363;392;393;407;410;411;424;490;441;445;452;461;472;473;479;341;334;323;194;194;124;125;145;158;168;180;202;307;307;207;215;219;232;256;272;520	1	-2							0	0	0	0	0	0
Q9NZT1	Q9NZT1	1	1	1	Calmodulin-like protein 5	CALML5	sp|Q9NZT1|CALL5_HUMAN Calmodulin-like protein 5 OS=Homo sapiens OX=9606 GN=CALML5 PE=1 SV=2	1	1	1	1	1	1	0	0	0	0	1	1	0	0	0	0	1	1	0	0	0	0	9.6	9.6	9.6	15.892	146	146	0.0095202	0.96474	By MS/MS	By matching					9.6	9.6	0	0	0	0
K7EJB9;K7EL50;P27797	K7EJB9;K7EL50;P27797	2;2;2	2;2;2	2;2;2	Calreticulin	CALR	tr|K7EJB9|K7EJB9_HUMAN Calreticulin OS=Homo sapiens OX=9606 GN=CALR PE=1 SV=2;tr|K7EL50|K7EL50_HUMAN Calreticulin OS=Homo sapiens OX=9606 GN=CALR PE=1 SV=2;sp|P27797|CALR_HUMAN Calreticulin OS=Homo sapiens OX=9606 GN=CALR PE=1 SV=1	3	2	2	2	0	0	0	0	0	0	0	0	0	0	0	0	0	0	0	0	0	0	9.5	9.5	9.5	40.535	349	349;378;417	0	27.367							0	0	0	0	0	0
D6R938;E9PBG7;E9PF82;Q13557	D6R938;E9PBG7;E9PF82;Q13557	1;1;1;1	1;1;1;1	1;1;1;1	Calcium/calmodulin-dependent protein kinase type II subunit delta	CAMK2D	tr|D6R938|D6R938_HUMAN Calcium/calmodulin-dependent protein kinase OS=Homo sapiens OX=9606 GN=CAMK2D PE=1 SV=1;tr|E9PBG7|E9PBG7_HUMAN Calcium/calmodulin-dependent protein kinase OS=Homo sapiens OX=9606 GN=CAMK2D PE=1 SV=1;tr|E9PF82|E9PF82_HUMAN Calcium/cal	4	1	1	1	0	0	1	0	0	1	0	0	1	0	0	1	0	0	1	0	0	1	2.6	2.6	2.6	56.298	498	498;512;533;499	0	2.3946			By MS/MS			By MS/MS	0	0	2.6	0	0	2.6
J3KPJ3;Q8N5S9	J3KPJ3;Q8N5S9	3;3	3;3	3;3	Calcium/calmodulin-dependent protein kinase kinase 1	CAMKK1	tr|J3KPJ3|J3KPJ3_HUMAN Calcium/calmodulin-dependent protein kinase kinase 1 OS=Homo sapiens OX=9606 GN=CAMKK1 PE=1 SV=1;sp|Q8N5S9|KKCC1_HUMAN Calcium/calmodulin-dependent protein kinase kinase 1 OS=Homo sapiens OX=9606 GN=CAMKK1 PE=1 SV=2	2	3	3	3	0	0	1	0	1	2	0	0	1	0	1	2	0	0	1	0	1	2	6	6	6	58.858	532	532;505	0.00045517	1.8716			By MS/MS		By MS/MS	By MS/MS	0	0	2.3	0	2.1	3.9
Q86VP6;A0A0C4DGH5	Q86VP6;A0A0C4DGH5	3;2	3;2	3;2	Cullin-associated NEDD8-dissociated protein 1	CAND1	sp|Q86VP6|CAND1_HUMAN Cullin-associated NEDD8-dissociated protein 1 OS=Homo sapiens OX=9606 GN=CAND1 PE=1 SV=2;tr|A0A0C4DGH5|A0A0C4DGH5_HUMAN Cullin-associated NEDD8-dissociated protein 1 (Fragment) OS=Homo sapiens OX=9606 GN=CAND1 PE=1 SV=1	2	3	3	3	0	0	2	0	0	1	0	0	2	0	0	1	0	0	2	0	0	1	3.2	3.2	3.2	136.37	1230	1230;770	0	5.5446			By MS/MS			By MS/MS	0	0	2	0	0	1
A0A7P0Z4D6;D6RGY2;A0A7P0T9L0;A0A7P0T8G1;A0A7P0TB65;A0A7P0T937;A0A7P0T840;A0A7P0TAE9;P27824	A0A7P0Z4D6;D6RGY2;A0A7P0T9L0;A0A7P0T8G1;A0A7P0TB65;A0A7P0T937;A0A7P0T840;A0A7P0TAE9;P27824	1;1;1;1;1;1;1;1;1	1;1;1;1;1;1;1;1;1	1;1;1;1;1;1;1;1;1	Calnexin	CANX	tr|A0A7P0Z4D6|A0A7P0Z4D6_HUMAN Calnexin OS=Homo sapiens OX=9606 GN=CANX PE=4 SV=1;tr|D6RGY2|D6RGY2_HUMAN Calnexin OS=Homo sapiens OX=9606 GN=CANX PE=1 SV=2;tr|A0A7P0T9L0|A0A7P0T9L0_HUMAN Calnexin OS=Homo sapiens OX=9606 GN=CANX PE=4 SV=1;tr|A0A7P0T8G1|A0A7	9	1	1	1	0	0	1	0	1	0	0	0	1	0	1	0	0	0	1	0	1	0	3.2	3.2	3.2	53.631	471	471;528;550;550;590;591;600;626;592	0.00048263	2.3113			By matching		By MS/MS		0	0	3.2	0	3.2	0
Q01518;Q5T0R7;Q5T0R6;Q5T0R5;Q5T0R4;Q5T0R3;Q5T0R2;Q5T0R1;Q5T0R9	Q01518;Q5T0R7;Q5T0R6;Q5T0R5;Q5T0R4;Q5T0R3;Q5T0R2;Q5T0R1	3;2;2;2;2;2;2;2;1	3;2;2;2;2;2;2;2;1	3;2;2;2;2;2;2;2;1	Adenylyl cyclase-associated protein 1;Adenylyl cyclase-associated protein	CAP1	sp|Q01518|CAP1_HUMAN Adenylyl cyclase-associated protein 1 OS=Homo sapiens OX=9606 GN=CAP1 PE=1 SV=5;tr|Q5T0R7|Q5T0R7_HUMAN Adenylyl cyclase-associated protein 1 (Fragment) OS=Homo sapiens OX=9606 GN=CAP1 PE=1 SV=1;tr|Q5T0R6|Q5T0R6_HUMAN Adenylyl cyclase-a	9	3	3	3	0	0	0	0	0	1	0	0	0	0	0	1	0	0	0	0	0	1	11.2	11.2	11.2	51.901	475	475;174;176;179;201;203;208;215;262	0	17.981						By matching	0	0	0	0	0	2.3
P07384;E9PRM1;E9PLX0;E9PJJ3;E9PLC9;E9PMC6;E9PJA6;E9PSA6;E9PQB3;E9PIA9;E9PL37	P07384	13;5;4;4;4;4;4;4;4;3;3	13;5;4;4;4;4;4;4;4;3;3	13;5;4;4;4;4;4;4;4;3;3	Calpain-1 catalytic subunit	CAPN1	sp|P07384|CAN1_HUMAN Calpain-1 catalytic subunit OS=Homo sapiens OX=9606 GN=CAPN1 PE=1 SV=1	11	13	13	13	0	0	9	0	0	6	0	0	9	0	0	6	0	0	9	0	0	6	24.1	24.1	24.1	81.889	714	714;201;122;135;148;152;161;163;191;63;191	0	15.226			By MS/MS			By MS/MS	0	0	14.6	0	0	10.2
P17655	P17655	3	3	3	Calpain-2 catalytic subunit	CAPN2	sp|P17655|CAN2_HUMAN Calpain-2 catalytic subunit OS=Homo sapiens OX=9606 GN=CAPN2 PE=1 SV=6	1	3	3	3	0	0	2	0	0	1	0	0	2	0	0	1	0	0	2	0	0	1	7.3	7.3	7.3	79.994	700	700	0	7.9482			By MS/MS			By MS/MS	0	0	5.1	0	0	2.6
P47756;B1AK87;B1AK85;A0A6I8PIN8	P47756;B1AK87;B1AK85	12;11;7;2	12;11;7;2	2;1;1;1	F-actin-capping protein subunit beta	CAPZB	sp|P47756|CAPZB_HUMAN F-actin-capping protein subunit beta OS=Homo sapiens OX=9606 GN=CAPZB PE=1 SV=4;tr|B1AK87|B1AK87_HUMAN F-actin-capping protein subunit beta OS=Homo sapiens OX=9606 GN=CAPZB PE=1 SV=2;tr|B1AK85|B1AK85_HUMAN F-actin-capping protein subu	4	12	12	2	3	2	5	1	1	6	3	2	5	1	1	6	1	1	1	1	1	1	46.9	46.9	10.5	31.35	277	277;244;260;63	0	16.36	By MS/MS	By MS/MS	By MS/MS	By MS/MS	By MS/MS	By MS/MS	12.6	12.6	26	5.8	5.8	25.3
Q9Y2V2;H3BTK3;I3L3X8;H3BSW7;H3BUY4;H3BPY5;H3BNU9	Q9Y2V2;H3BTK3;I3L3X8;H3BSW7;H3BUY4;H3BPY5;H3BNU9	2;1;1;1;1;1;1	2;1;1;1;1;1;1	2;1;1;1;1;1;1	Calcium-regulated heat stable protein 1	CARHSP1	sp|Q9Y2V2|CHSP1_HUMAN Calcium-regulated heat-stable protein 1 OS=Homo sapiens OX=9606 GN=CARHSP1 PE=1 SV=2;tr|H3BTK3|H3BTK3_HUMAN Calcium-regulated heat-stable protein 1 (Fragment) OS=Homo sapiens OX=9606 GN=CARHSP1 PE=1 SV=1;tr|I3L3X8|I3L3X8_HUMAN Calcium	7	2	2	2	0	0	1	0	0	1	0	0	1	0	0	1	0	0	1	0	0	1	27.2	27.2	27.2	15.892	147	147;71;94;112;124;125;131	0	35.836			By MS/MS			By MS/MS	0	0	10.9	0	0	16.3
Q5T4H9	Q5T4H9	2	2	2	Protein CASC10	CASC10	sp|Q5T4H9|CSC10_HUMAN Putative uncharacterized protein encoded by MIR1915-HG OS=Homo sapiens OX=9606 GN=MIR1915HG PE=5 SV=1	1	2	2	2	1	1	0	0	1	1	1	1	0	0	1	1	1	1	0	0	1	1	13.2	13.2	13.2	14.85	136	136	0.005618	1.1717	By MS/MS	By MS/MS			By MS/MS	By MS/MS	6.6	6.6	0	0	6.6	6.6
P55212;D6RHU3	P55212;D6RHU3	2;1	2;1	2;1	Caspase-6;Caspase-6 subunit p18;Caspase-6 subunit p11	CASP6	sp|P55212|CASP6_HUMAN Caspase-6 OS=Homo sapiens OX=9606 GN=CASP6 PE=1 SV=2;tr|D6RHU3|D6RHU3_HUMAN Caspase-6 (Fragment) OS=Homo sapiens OX=9606 GN=CASP6 PE=1 SV=1	2	2	2	2	0	0	1	0	0	0	0	0	1	0	0	0	0	0	1	0	0	0	8.9	8.9	8.9	33.31	293	293;143	0	5.1826			By MS/MS				0	0	3.1	0	0	0
E7EQ01;E7EVN1;E7ETB7;E7EQ06;A0A0A0MS31;Q14790	E7EQ01;E7EVN1;E7ETB7;E7EQ06;A0A0A0MS31;Q14790	1;1;1;1;1;1	1;1;1;1;1;1	1;1;1;1;1;1	Caspase-8;Caspase-8 subunit p18;Caspase-8 subunit p10	CASP8	tr|E7EQ01|E7EQ01_HUMAN Caspase-8 (Fragment) OS=Homo sapiens OX=9606 GN=CASP8 PE=1 SV=1;tr|E7EVN1|E7EVN1_HUMAN Caspase-8 (Fragment) OS=Homo sapiens OX=9606 GN=CASP8 PE=1 SV=1;tr|E7ETB7|E7ETB7_HUMAN Caspase-8 (Fragment) OS=Homo sapiens OX=9606 GN=CASP8 PE=1	6	1	1	1	0	0	0	0	0	0	0	0	0	0	0	0	0	0	0	0	0	0	15.5	15.5	15.5	13.925	116	116;124;198;209;278;479	0	11.845							0	0	0	0	0	0
F8WEM5;C9K074;Q75N03	F8WEM5;C9K074;Q75N03	1;1;1	1;1;1	1;1;1	E3 ubiquitin-protein ligase Hakai	CBLL1	tr|F8WEM5|F8WEM5_HUMAN E3 ubiquitin-protein ligase Hakai OS=Homo sapiens OX=9606 GN=CBLL1 PE=1 SV=1;tr|C9K074|C9K074_HUMAN E3 ubiquitin-protein ligase Hakai OS=Homo sapiens OX=9606 GN=CBLL1 PE=1 SV=2;sp|Q75N03|HAKAI_HUMAN E3 ubiquitin-protein ligase Hakai	3	1	1	1	0	1	0	1	1	0	0	1	0	1	1	0	0	1	0	1	1	0	35.8	35.8	35.8	7.2462	67	67;123;491	0	4.2099		By MS/MS		By MS/MS	By matching		0	35.8	0	35.8	35.8	0
Q9BRT8;A0A087X140;Q8IUF1;Q4V339;Q5JTY5;Q5RIA9;A0A0A0MRU4;C9J3G2;H0Y5V3;Q5RIB0;A0A0A6YYH9;A0A087WWG3;A0A0B4J2F1;Q5JTY2;Q5RIB5;A0A087WYD2;F2Z2T4;F8WEU0;Q6NVZ8;A0A087WZQ3;A0A0B4J2E3;F8WEG4;A0A087WTC0;E7EUZ7	Q9BRT8;A0A087X140;Q8IUF1;Q4V339;Q5JTY5;Q5RIA9;A0A0A0MRU4;C9J3G2;H0Y5V3;Q5RIB0;A0A0A6YYH9;A0A087WWG3;A0A0B4J2F1;Q5JTY2;Q5RIB5;A0A087WYD2;F2Z2T4;F8WEU0;Q6NVZ8;A0A087WZQ3;A0A0B4J2E3;F8WEG4;A0A087WTC0;E7EUZ7	2;2;2;2;2;2;2;2;2;2;2;2;1;1;1;1;1;1;1;1;1;1;1;1	2;2;2;2;2;2;2;2;2;2;2;2;1;1;1;1;1;1;1;1;1;1;1;1	2;2;2;2;2;2;2;2;2;2;2;2;1;1;1;1;1;1;1;1;1;1;1;1	COBW domain-containing protein 1;COBW domain-containing protein 2;COBW domain-containing protein 6;COBW domain-containing protein 3;COBW domain-containing protein 5	CBWD1;CBWD2;CBWD6;CBWD3;CBWD5;CBWD7	sp|Q9BRT8|CBWD1_HUMAN COBW domain-containing protein 1 OS=Homo sapiens OX=9606 GN=CBWD1 PE=1 SV=1;tr|A0A087X140|A0A087X140_HUMAN COBW domain-containing protein 1 OS=Homo sapiens OX=9606 GN=CBWD1 PE=1 SV=1;sp|Q8IUF1|CBWD2_HUMAN COBW domain-containing protei	24	2	2	2	0	0	1	0	0	1	0	0	1	0	0	1	0	0	1	0	0	1	6.8	6.8	6.8	44.068	395	395;347;395;395;395;395;376;376;376;376;375;347;359;160;113;182;250;182;180;180;180;180;160;182	0.00089286	1.7261			By MS/MS			By MS/MS	0	0	3.5	0	0	3.5
J3KS05;P83916	J3KS05;P83916	2;2	1;1	1;1	Chromobox protein homolog 1	CBX1	tr|J3KS05|J3KS05_HUMAN Chromobox protein homolog 1 (Fragment) OS=Homo sapiens OX=9606 GN=CBX1 PE=1 SV=8;sp|P83916|CBX1_HUMAN Chromobox protein homolog 1 OS=Homo sapiens OX=9606 GN=CBX1 PE=1 SV=1	2	2	1	1	0	0	1	0	0	1	0	0	0	0	0	0	0	0	0	0	0	0	16.2	6.9	6.9	20.03	173	173;185	0.0055933	1.1468			By matching			By matching	0	0	9.2	0	0	9.2
Q9HC52;C9J6K3	Q9HC52;C9J6K3	2;1	2;1	2;1	Chromobox protein homolog 8	CBX8	sp|Q9HC52|CBX8_HUMAN Chromobox protein homolog 8 OS=Homo sapiens OX=9606 GN=CBX8 PE=1 SV=3;tr|C9J6K3|C9J6K3_HUMAN Chromobox protein homolog 8 (Fragment) OS=Homo sapiens OX=9606 GN=CBX8 PE=1 SV=1	2	2	2	2	0	1	1	0	0	1	0	1	1	0	0	1	0	1	1	0	0	1	10.8	10.8	10.8	43.395	389	389;242	0.0017552	1.5936		By matching	By MS/MS			By MS/MS	0	5.9	4.9	0	0	5.9
H0YFJ7;F5H1H2;F5H2E6;A0A0C4DGG8;Q8IX12	H0YFJ7;F5H1H2;F5H2E6;A0A0C4DGG8;Q8IX12	1;1;1;1;1	1;1;1;1;1	1;1;1;1;1	Cell division cycle and apoptosis regulator protein 1	CCAR1	tr|H0YFJ7|H0YFJ7_HUMAN Cell division cycle and apoptosis regulator protein 1 (Fragment) OS=Homo sapiens OX=9606 GN=CCAR1 PE=1 SV=1;tr|F5H1H2|F5H1H2_HUMAN Cell division cycle and apoptosis regulator protein 1 (Fragment) OS=Homo sapiens OX=9606 GN=CCAR1 PE=1	5	1	1	1	0	0	1	0	1	0	0	0	1	0	1	0	0	0	1	0	1	0	6.2	6.2	6.2	34.671	290	290;646;772;1043;1150	0.00046926	2.0859			By MS/MS		By matching		0	0	6.2	0	6.2	0
H3BPL5;Q96ES7	H3BPL5;Q96ES7	1;1	1;1	1;1	SAGA-associated factor 29 homolog	CCDC101	tr|H3BPL5|H3BPL5_HUMAN SAGA-associated factor 29 OS=Homo sapiens OX=9606 GN=SGF29 PE=1 SV=1;sp|Q96ES7|SGF29_HUMAN SAGA-associated factor 29 OS=Homo sapiens OX=9606 GN=SGF29 PE=1 SV=1	2	1	1	1	0	0	0	0	0	0	0	0	0	0	0	0	0	0	0	0	0	0	9.8	9.8	9.8	14.619	132	132;293	0	2.7681							0	0	0	0	0	0
Q96A19	Q96A19	1	1	1	Coiled-coil domain-containing protein 102A	CCDC102A	sp|Q96A19|C102A_HUMAN Coiled-coil domain-containing protein 102A OS=Homo sapiens OX=9606 GN=CCDC102A PE=1 SV=2	1	1	1	1	1	1	0	1	1	0	1	1	0	1	1	0	1	1	0	1	1	0	4	4	4	62.595	550	550	0	18.414	By MS/MS	By MS/MS		By matching	By MS/MS		4	4	0	4	4	0
Q96CT7;M0R2F5	Q96CT7	6;2	6;2	6;2	Coiled-coil domain-containing protein 124	CCDC124	sp|Q96CT7|CC124_HUMAN Coiled-coil domain-containing protein 124 OS=Homo sapiens OX=9606 GN=CCDC124 PE=1 SV=1	2	6	6	6	1	1	2	2	5	3	1	1	2	2	5	3	1	1	2	2	5	3	30.9	30.9	30.9	25.835	223	223;136	0	21.091	By matching	By MS/MS	By MS/MS	By MS/MS	By MS/MS	By MS/MS	6.3	6.3	16.1	12.1	26.5	22.4
B8ZZI4;Q8NCX0	B8ZZI4;Q8NCX0	1;1	1;1	1;1	Coiled-coil domain-containing protein 150	CCDC150	tr|B8ZZI4|B8ZZI4_HUMAN Coiled-coil domain-containing protein 150 OS=Homo sapiens OX=9606 GN=CCDC150 PE=1 SV=1;sp|Q8NCX0|CC150_HUMAN Coiled-coil domain-containing protein 150 OS=Homo sapiens OX=9606 GN=CCDC150 PE=1 SV=2	2	1	1	1	0	0	0	0	0	1	0	0	0	0	0	1	0	0	0	0	0	1	2.9	2.9	2.9	68.837	588	588;1101	1	-2						By matching	0	0	0	0	0	2.9
Q5M9N0	Q5M9N0	1	1	1	Coiled-coil domain-containing protein 158	CCDC158	sp|Q5M9N0|CD158_HUMAN Coiled-coil domain-containing protein 158 OS=Homo sapiens OX=9606 GN=CCDC158 PE=1 SV=2	1	1	1	1	0	0	1	0	0	1	0	0	1	0	0	1	0	0	1	0	0	1	1.3	1.3	1.3	127.14	1113	1113	1	-2			By MS/MS			By MS/MS	0	0	1.3	0	0	1.3
E9PBZ7;A6NNP5	E9PBZ7;A6NNP5	1;1	1;1	1;1	Coiled-coil domain-containing protein 169	CCDC169	tr|E9PBZ7|E9PBZ7_HUMAN Coiled-coil domain-containing protein 169 OS=Homo sapiens OX=9606 GN=CCDC169 PE=4 SV=1;sp|A6NNP5|CC169_HUMAN Coiled-coil domain-containing protein 169 OS=Homo sapiens OX=9606 GN=CCDC169 PE=2 SV=4	2	1	1	1	0	0	1	0	0	0	0	0	1	0	0	0	0	0	1	0	0	0	8.8	8.8	8.8	10.683	91	91;214	0.0095093	0.96174			By MS/MS				0	0	8.8	0	0	0
A0A0A0MTQ8;P0C221	A0A0A0MTQ8;P0C221	1;1	1;1	1;1	Coiled-coil domain-containing protein 175	CCDC175	tr|A0A0A0MTQ8|A0A0A0MTQ8_HUMAN Coiled-coil domain-containing protein 175 OS=Homo sapiens OX=9606 GN=CCDC175 PE=1 SV=1;sp|P0C221|CC175_HUMAN Coiled-coil domain-containing protein 175 OS=Homo sapiens OX=9606 GN=CCDC175 PE=4 SV=2	2	1	1	1	0	0	1	0	0	1	0	0	1	0	0	1	0	0	1	0	0	1	0.8	0.8	0.8	97.413	828	828;793	0	27.61			By MS/MS			By MS/MS	0	0	0.8	0	0	0.8
Q8ND07	Q8ND07	1	1	1	Basal body-orientation factor 1	CCDC176	sp|Q8ND07|BBOF1_HUMAN Basal body-orientation factor 1 OS=Homo sapiens OX=9606 GN=BBOF1 PE=2 SV=3	1	1	1	1	0	0	0	0	0	1	0	0	0	0	0	1	0	0	0	0	0	1	1.9	1.9	1.9	61.986	529	529	1	-2						By MS/MS	0	0	0	0	0	1.9
O60826	O60826	4	4	4	Coiled-coil domain-containing protein 22	CCDC22	sp|O60826|CCD22_HUMAN Coiled-coil domain-containing protein 22 OS=Homo sapiens OX=9606 GN=CCDC22 PE=1 SV=1	1	4	4	4	0	0	2	0	0	3	0	0	2	0	0	3	0	0	2	0	0	3	9.1	9.1	9.1	70.755	627	627	0	10.147			By MS/MS			By MS/MS	0	0	5.6	0	0	6.9
Q86WR0	Q86WR0	1	1	1	Coiled-coil domain-containing protein 25	CCDC25	sp|Q86WR0|CCD25_HUMAN Coiled-coil domain-containing protein 25 OS=Homo sapiens OX=9606 GN=CCDC25 PE=1 SV=2	1	1	1	1	0	0	0	0	1	0	0	0	0	0	1	0	0	0	0	0	1	0	3.8	3.8	3.8	24.479	208	208	1	-2					By MS/MS		0	0	0	0	3.8	0
B4DUJ5;Q8IWP9	B4DUJ5;Q8IWP9	1;1	1;1	1;1	Coiled-coil domain-containing protein 28A	CCDC28A	tr|B4DUJ5|B4DUJ5_HUMAN Coiled-coil domain-containing protein 28A OS=Homo sapiens OX=9606 GN=CCDC28A PE=1 SV=1;sp|Q8IWP9|CC28A_HUMAN Coiled-coil domain-containing protein 28A OS=Homo sapiens OX=9606 GN=CCDC28A PE=1 SV=1	2	1	1	1	0	0	0	0	0	0	0	0	0	0	0	0	0	0	0	0	0	0	12.5	12.5	12.5	20.463	184	184;274	0	3.6342							0	0	0	0	0	0
A0A590UJC1;A0A590UJA8;A0A590UJ92;A0A2U3TZI4;A0A590UK19;Q5VVM6	A0A590UJC1;A0A590UJA8;A0A590UJ92;A0A2U3TZI4;A0A590UK19;Q5VVM6	1;1;1;1;1;1	1;1;1;1;1;1	1;1;1;1;1;1	Coiled-coil domain-containing protein 30	CCDC30	tr|A0A590UJC1|A0A590UJC1_HUMAN Coiled-coil domain-containing protein 30 OS=Homo sapiens OX=9606 GN=CCDC30 PE=4 SV=1;tr|A0A590UJA8|A0A590UJA8_HUMAN Coiled-coil domain-containing protein 30 OS=Homo sapiens OX=9606 GN=CCDC30 PE=4 SV=1;tr|A0A590UJ92|A0A590UJ92	6	1	1	1	0	0	1	0	0	0	0	0	1	0	0	0	0	0	1	0	0	0	2.4	2.4	2.4	78.41	666	666;710;797;826;939;783	0.00045767	1.8993			By MS/MS				0	0	2.4	0	0	0
Q86WV7;Q96MW1	Q86WV7;Q96MW1	1;1	1;1	1;1	Coiled-coil domain-containing protein 43	CCDC43	tr|Q86WV7|Q86WV7_HUMAN Coiled-coil domain-containing protein 43 OS=Homo sapiens OX=9606 GN=CCDC43 PE=1 SV=1;sp|Q96MW1|CCD43_HUMAN Coiled-coil domain-containing protein 43 OS=Homo sapiens OX=9606 GN=CCDC43 PE=1 SV=2	2	1	1	1	1	0	0	1	1	0	1	0	0	1	1	0	1	0	0	1	1	0	4.8	4.8	4.8	25.563	227	227;224	0.0059785	1.1388	By MS/MS			By MS/MS	By MS/MS		4.8	0	0	4.8	4.8	0
E9PMP4	E9PMP4	1	1	1		CCDC67	tr|E9PMP4|E9PMP4_HUMAN Coiled-coil domain-containing protein 67 OS=Homo sapiens OX=9606 GN=DEUP1 PE=1 SV=1	1	1	1	1	1	1	0	0	1	0	1	1	0	0	1	0	1	1	0	0	1	0	19.8	19.8	19.8	12.265	106	106	1	-2	By MS/MS	By MS/MS			By MS/MS		19.8	19.8	0	0	19.8	0
H7BY33;A6NC98	H7BY33;A6NC98	1;1	1;1	1;1	Coiled-coil domain-containing protein 88B	CCDC88B	tr|H7BY33|H7BY33_HUMAN Coiled-coil domain-containing protein 88B OS=Homo sapiens OX=9606 GN=CCDC88B PE=1 SV=1;sp|A6NC98|CC88B_HUMAN Coiled-coil domain-containing protein 88B OS=Homo sapiens OX=9606 GN=CCDC88B PE=1 SV=1	2	1	1	1	0	0	0	1	0	0	0	0	0	1	0	0	0	0	0	1	0	0	2.2	2.2	2.2	80.654	712	712;1476	1	-2				By MS/MS			0	0	0	2.2	0	0
Q9Y3X0;M0QYB4;A0A2R8Y4Z8	Q9Y3X0;M0QYB4;A0A2R8Y4Z8	2;1;1	2;1;1	2;1;1	Coiled-coil domain-containing protein 9	CCDC9	sp|Q9Y3X0|CCDC9_HUMAN Coiled-coil domain-containing protein 9 OS=Homo sapiens OX=9606 GN=CCDC9 PE=1 SV=1;tr|M0QYB4|M0QYB4_HUMAN Coiled-coil domain-containing protein 9 (Fragment) OS=Homo sapiens OX=9606 GN=CCDC9 PE=1 SV=1;tr|A0A2R8Y4Z8|A0A2R8Y4Z8_HUMAN Coi	3	2	2	2	1	2	1	0	2	1	1	2	1	0	2	1	1	2	1	0	2	1	7.2	7.2	7.2	59.702	531	531;128;587	0	5.1732	By MS/MS	By MS/MS	By MS/MS		By MS/MS	By MS/MS	3.6	7.2	3.6	0	7.2	3.6
M0R2S3;Q9BW85	M0R2S3;Q9BW85	1;1	1;1	1;1	Coiled-coil domain-containing protein 94	CCDC94	tr|M0R2S3|M0R2S3_HUMAN Splicing factor YJU2 (Fragment) OS=Homo sapiens OX=9606 GN=YJU2 PE=1 SV=8;sp|Q9BW85|YJU2_HUMAN Splicing factor YJU2 OS=Homo sapiens OX=9606 GN=YJU2 PE=1 SV=1	2	1	1	1	0	0	0	0	0	1	0	0	0	0	0	1	0	0	0	0	0	1	9.4	9.4	9.4	19.359	160	160;323	0.00089087	1.7153						By MS/MS	0	0	0	0	0	9.4
Q96F63;M0QXS4	Q96F63	3;1	3;1	3;1	Coiled-coil domain-containing protein 97	CCDC97	sp|Q96F63|CCD97_HUMAN Coiled-coil domain-containing protein 97 OS=Homo sapiens OX=9606 GN=CCDC97 PE=1 SV=1	2	3	3	3	0	0	0	0	1	1	0	0	0	0	1	1	0	0	0	0	1	1	9.6	9.6	9.6	38.946	343	343;154	0	51.828					By matching	By MS/MS	0	0	0	0	6.7	2.9
Q8TD31;A0A0G2JP87;B0S7V6;A0A0G2JJ47;A2ABH1;E7EQE8;A0A0G2JII5;A0A494C023;A0A494C0D7;A0A140T9J5;A0A0G2JHN4;D6RAE7;A0A0G2JHL3;E7EPK4;A2ABH3;A0A0G2JJZ1;A0A0G2JIL2;E9PHV1;E9PGB6;A2ABH4;E7EQC5;A0A0G2JPU2;A0A0G2JHL6	Q8TD31;A0A0G2JP87;B0S7V6;A0A0G2JJ47;A2ABH1;E7EQE8;A0A0G2JII5;A0A494C023;A0A494C0D7;A0A140T9J5;A0A0G2JHN4;D6RAE7;A0A0G2JHL3;E7EPK4;A2ABH3;A0A0G2JJZ1;A0A0G2JIL2;E9PHV1;E9PGB6;A2ABH4;E7EQC5;A0A0G2JPU2;A0A0G2JHL6	2;2;2;2;2;1;1;1;1;1;1;1;1;1;1;1;1;1;1;1;1;1;1	2;2;2;2;2;1;1;1;1;1;1;1;1;1;1;1;1;1;1;1;1;1;1	2;2;2;2;2;1;1;1;1;1;1;1;1;1;1;1;1;1;1;1;1;1;1	Coiled-coil alpha-helical rod protein 1	CCHCR1	sp|Q8TD31|CCHCR_HUMAN Coiled-coil alpha-helical rod protein 1 OS=Homo sapiens OX=9606 GN=CCHCR1 PE=1 SV=2;tr|A0A0G2JP87|A0A0G2JP87_HUMAN Alpha-helical coiled-coil rod protein OS=Homo sapiens OX=9606 GN=CCHCR1 PE=1 SV=1;tr|B0S7V6|B0S7V6_HUMAN Alpha-helical	23	2	2	2	0	0	1	0	0	1	0	0	1	0	0	1	0	0	1	0	0	1	2.9	2.9	2.9	88.67	782	782;870;782;729;729;139;729;379;365;316;316;126;256;191;188;188;171;159;158;152;140;870;256	0.0059666	1.1326			By MS/MS			By matching	0	0	1.5	0	0	1.5
Q92526	Q92526	7	1	1	T-complex protein 1 subunit zeta-2	CCT6B	sp|Q92526|TCPW_HUMAN T-complex protein 1 subunit zeta-2 OS=Homo sapiens OX=9606 GN=CCT6B PE=1 SV=5	1	7	1	1	3	4	6	5	3	5	0	0	1	1	0	0	0	0	1	1	0	0	11.5	2.3	2.3	57.821	530	530	0.0025608	1.4243	By matching	By matching	By MS/MS	By MS/MS	By matching	By matching	4.9	7.4	11.5	9.6	4.9	8.1
F8WD66;P86791;P86790	F8WD66;P86791;P86790	1;1;1	1;1;1	1;1;1	Vacuolar fusion protein CCZ1 homolog;Vacuolar fusion protein CCZ1 homolog B	CCZ1B;CCZ1	tr|F8WD66|F8WD66_HUMAN Vacuolar fusion protein CCZ1 homolog OS=Homo sapiens OX=9606 GN=CCZ1B PE=1 SV=1;sp|P86791|CCZ1_HUMAN Vacuolar fusion protein CCZ1 homolog OS=Homo sapiens OX=9606 GN=CCZ1 PE=1 SV=1;sp|P86790|CCZ1B_HUMAN Vacuolar fusion protein CCZ1 ho	3	1	1	1	0	0	1	0	0	0	0	0	1	0	0	0	0	0	1	0	0	0	16.7	16.7	16.7	8.6959	78	78;482;482	0.00089566	1.7627			By MS/MS				0	0	16.7	0	0	0
X6RA30;O75794;X6RKY7;X6RF82	X6RA30;O75794;X6RKY7;X6RF82	3;3;2;2	3;3;2;2	3;3;2;2	Cell division cycle protein 123 homolog	CDC123	tr|X6RA30|X6RA30_HUMAN Cell division cycle protein 123 homolog OS=Homo sapiens OX=9606 GN=CDC123 PE=1 SV=1;sp|O75794|CD123_HUMAN Cell division cycle protein 123 homolog OS=Homo sapiens OX=9606 GN=CDC123 PE=1 SV=1;tr|X6RKY7|X6RKY7_HUMAN Cell division cycle	4	3	3	3	0	0	0	0	0	1	0	0	0	0	0	1	0	0	0	0	0	1	16.3	16.3	16.3	33.891	295	295;336;157;183	0	3.3449						By MS/MS	0	0	0	0	0	3.4
A0A2R8YEK7;A0A2R8Y5L8;A0A2R8Y6L0;A0A0U1RQX7;A0A2R8YDJ8;Q9UNH5	A0A2R8YEK7;A0A2R8Y5L8;A0A2R8Y6L0;A0A0U1RQX7;A0A2R8YDJ8;Q9UNH5	1;1;1;1;1;1	1;1;1;1;1;1	1;1;1;1;1;1	Dual specificity protein phosphatase CDC14A	CDC14A	tr|A0A2R8YEK7|A0A2R8YEK7_HUMAN Dual-specificity protein phosphatase CDC14A OS=Homo sapiens OX=9606 GN=CDC14A PE=1 SV=1;tr|A0A2R8Y5L8|A0A2R8Y5L8_HUMAN Dual-specificity protein phosphatase CDC14A OS=Homo sapiens OX=9606 GN=CDC14A PE=1 SV=1;tr|A0A2R8Y6L0|A0A2	6	1	1	1	1	0	0	0	1	0	1	0	0	0	1	0	1	0	0	0	1	0	5.7	5.7	5.7	38.216	333	333;334;552;565;624;594	1	-2	By MS/MS				By matching		5.7	0	0	0	5.7	0
G5EA36;P30260;I3L328;I3L394	G5EA36;P30260;I3L328;I3L394	2;2;1;1	2;2;1;1	2;2;1;1	Cell division cycle protein 27 homolog	CDC27	tr|G5EA36|G5EA36_HUMAN Cell division cycle 27, isoform CRA_c OS=Homo sapiens OX=9606 GN=CDC27 PE=1 SV=1;sp|P30260|CDC27_HUMAN Cell division cycle protein 27 homolog OS=Homo sapiens OX=9606 GN=CDC27 PE=1 SV=2;tr|I3L328|I3L328_HUMAN Cell division cycle prote	4	2	2	2	0	0	1	0	0	1	0	0	1	0	0	1	0	0	1	0	0	1	3.6	3.6	3.6	91.737	823	823;824;113;163	0.00046598	2.0379			By MS/MS			By MS/MS	0	0	1.8	0	0	1.8
U3KQP9;U3KQ77;U3KPV8;P49427	U3KQP9;U3KQ77;U3KPV8;P49427	1;1;1;1	1;1;1;1	1;1;1;1	Ubiquitin-conjugating enzyme E2 R1	CDC34	tr|U3KQP9|U3KQP9_HUMAN Ubiquitin-conjugating enzyme E2 R1 (Fragment) OS=Homo sapiens OX=9606 GN=CDC34 PE=1 SV=2;tr|U3KQ77|U3KQ77_HUMAN Ubiquitin-conjugating enzyme E2 R1 (Fragment) OS=Homo sapiens OX=9606 GN=CDC34 PE=1 SV=1;tr|U3KPV8|U3KPV8_HUMAN Ubiquitin	4	1	1	1	0	0	1	0	0	1	0	0	1	0	0	1	0	0	1	0	0	1	14	14	14	12.173	107	107;119;146;236	0.00090416	1.8193			By MS/MS			By MS/MS	0	0	14	0	0	14
P60953	P60953	1	1	1	Cell division control protein 42 homolog	CDC42	sp|P60953|CDC42_HUMAN Cell division control protein 42 homolog OS=Homo sapiens OX=9606 GN=CDC42 PE=1 SV=2	1	1	1	1	0	0	1	0	0	1	0	0	1	0	0	1	0	0	1	0	0	1	8.9	8.9	8.9	21.258	191	191	0	7.7074			By MS/MS			By MS/MS	0	0	8.9	0	0	8.9
Q00587	Q00587	1	1	1	Cdc42 effector protein 1	CDC42EP1	sp|Q00587|BORG5_HUMAN Cdc42 effector protein 1 OS=Homo sapiens OX=9606 GN=CDC42EP1 PE=1 SV=1	1	1	1	1	1	1	0	1	1	0	1	1	0	1	1	0	1	1	0	1	1	0	4.6	4.6	4.6	40.294	391	391	0.0029536	1.3797	By MS/MS	By MS/MS		By matching	By MS/MS		4.6	4.6	0	4.6	4.6	0
Q96FF9;B5MBX0;H0YCL8	Q96FF9;B5MBX0	3;3;1	3;3;1	3;3;1	Sororin	CDCA5	sp|Q96FF9|CDCA5_HUMAN Sororin OS=Homo sapiens OX=9606 GN=CDCA5 PE=1 SV=1;tr|B5MBX0|B5MBX0_HUMAN Sororin OS=Homo sapiens OX=9606 GN=CDCA5 PE=1 SV=1	3	3	3	3	0	0	1	0	0	2	0	0	1	0	0	2	0	0	1	0	0	2	21.4	21.4	21.4	27.6	252	252;307;70	0	24.073			By MS/MS			By MS/MS	0	0	6	0	0	15.5
A0A087WZZ9;A0A024QZP7;P06493;E5RIU6	A0A087WZZ9;A0A024QZP7;P06493;E5RIU6	3;3;3;2	2;2;2;1	2;2;2;1	Cyclin-dependent kinase 1	CDK1;CDC2	tr|A0A087WZZ9|A0A087WZZ9_HUMAN Cyclin-dependent kinase 1 OS=Homo sapiens OX=9606 GN=CDK1 PE=1 SV=1;tr|A0A024QZP7|A0A024QZP7_HUMAN Cell division cycle 2, G1 to S and G2 to M, isoform CRA_a OS=Homo sapiens OX=9606 GN=CDK1 PE=1 SV=1;sp|P06493|CDK1_HUMAN Cycli	4	3	2	2	0	0	2	1	1	1	0	0	1	0	0	0	0	0	1	0	0	0	17.4	13.8	13.8	25.836	224	224;297;297;189	0	5.1354			By MS/MS	By matching	By matching	By matching	0	0	10.7	3.6	3.6	3.6
O94921	O94921	2	1	1	Cyclin-dependent kinase 14	CDK14	sp|O94921|CDK14_HUMAN Cyclin-dependent kinase 14 OS=Homo sapiens OX=9606 GN=CDK14 PE=1 SV=3	1	2	1	1	1	0	2	1	1	2	1	0	1	0	0	1	1	0	1	0	0	1	4.7	3	3	53.056	469	469	1	-2	By matching		By MS/MS	By matching	By matching	By MS/MS	3	0	4.7	1.7	1.7	4.7
E5RGV7	E5RGV7	1	1	1		CDK16	tr|E5RGV7|E5RGV7_HUMAN Cyclin-dependent kinase 16 OS=Homo sapiens OX=9606 GN=CDK16 PE=1 SV=1	1	1	1	1	1	0	0	0	1	0	1	0	0	0	1	0	1	0	0	0	1	0	12	12	12	8.5225	83	83	1	-2	By MS/MS				By MS/MS		12	0	0	0	12	0
E7ESI2;G3V5T9;P24941;K7EJ83;Q00526	E7ESI2;G3V5T9;P24941;K7EJ83;Q00526	3;3;3;2;2	2;2;2;1;1	2;2;2;1;1	Cyclin-dependent kinase 2;Cyclin-dependent kinase 3	CDK2;CDK3	tr|E7ESI2|E7ESI2_HUMAN Cyclin-dependent kinase 2 OS=Homo sapiens OX=9606 GN=CDK2 PE=1 SV=1;tr|G3V5T9|G3V5T9_HUMAN Cyclin-dependent kinase 2 OS=Homo sapiens OX=9606 GN=CDK2 PE=1 SV=1;sp|P24941|CDK2_HUMAN Cyclin-dependent kinase 2 OS=Homo sapiens OX=9606 GN=	5	3	2	2	0	0	2	1	1	3	0	0	1	0	0	2	0	0	1	0	0	2	17.6	14.3	14.3	27.164	238	238;346;298;213;305	0	4.1784			By matching	By matching	By matching	By MS/MS	0	0	9.2	3.4	3.4	17.6
F5GZF0;O14519	F5GZF0;O14519	2;2	2;2	2;2	Cyclin-dependent kinase 2-associated protein 1	CDK2AP1	tr|F5GZF0|F5GZF0_HUMAN Cyclin-dependent kinase 2-associated protein 1 (Fragment) OS=Homo sapiens OX=9606 GN=CDK2AP1 PE=1 SV=1;sp|O14519|CDKA1_HUMAN Cyclin-dependent kinase 2-associated protein 1 OS=Homo sapiens OX=9606 GN=CDK2AP1 PE=1 SV=1	2	2	2	2	0	0	1	0	0	1	0	0	1	0	0	1	0	0	1	0	0	1	59.1	59.1	59.1	7.2241	66	66;115	0	18.877			By MS/MS			By MS/MS	0	0	39.4	0	0	19.7
O75956	O75956	1	1	1	Cyclin-dependent kinase 2-associated protein 2	CDK2AP2	sp|O75956|CDKA2_HUMAN Cyclin-dependent kinase 2-associated protein 2 OS=Homo sapiens OX=9606 GN=CDK2AP2 PE=1 SV=1	1	1	1	1	1	0	0	0	0	1	1	0	0	0	0	1	1	0	0	0	0	1	9.5	9.5	9.5	13.101	126	126	0.0045119	1.2412	By MS/MS					By MS/MS	9.5	0	0	0	0	9.5
Q00535	Q00535	4	3	3	Cyclin-dependent-like kinase 5	CDK5	sp|Q00535|CDK5_HUMAN Cyclin-dependent-like kinase 5 OS=Homo sapiens OX=9606 GN=CDK5 PE=1 SV=3	1	4	3	3	0	0	3	1	1	2	0	0	2	0	0	1	0	0	2	0	0	1	15.8	13	13	33.304	292	292	0	3.4435			By MS/MS	By matching	By matching	By MS/MS	0	0	11.6	2.7	2.7	5.5
Q15078	Q15078	1	1	1	Cyclin-dependent kinase 5 activator 1;Cyclin-dependent kinase 5 activator 1, p35;Cyclin-dependent kinase 5 activator 1, p25	CDK5R1	sp|Q15078|CD5R1_HUMAN Cyclin-dependent kinase 5 activator 1 OS=Homo sapiens OX=9606 GN=CDK5R1 PE=1 SV=1	1	1	1	1	1	1	0	1	1	0	1	1	0	1	1	0	1	1	0	1	1	0	9.1	9.1	9.1	34.06	307	307	1	-2	By MS/MS	By MS/MS		By MS/MS	By MS/MS		9.1	9.1	0	9.1	9.1	0
C9K0C9;F8WF55;F8WCI3;A0A0A0MRG9;Q96SN8	C9K0C9;F8WF55;F8WCI3;A0A0A0MRG9;Q96SN8	1;1;1;1;1	1;1;1;1;1	1;1;1;1;1	CDK5 regulatory subunit-associated protein 2	CDK5RAP2	tr|C9K0C9|C9K0C9_HUMAN CDK5 regulatory subunit-associated protein 2 (Fragment) OS=Homo sapiens OX=9606 GN=CDK5RAP2 PE=1 SV=1;tr|F8WF55|F8WF55_HUMAN CDK5 regulatory subunit-associated protein 2 OS=Homo sapiens OX=9606 GN=CDK5RAP2 PE=1 SV=1;tr|F8WCI3|F8WCI3_	5	1	1	1	0	0	0	0	1	0	0	0	0	0	1	0	0	0	0	0	1	0	10.5	10.5	10.5	15.102	133	133;460;749;1663;1893	1	-2					By MS/MS		0	0	0	0	10.5	0
Q96HQ2	Q96HQ2	3	3	3	CDKN2AIP N-terminal-like protein	CDKN2AIPNL	sp|Q96HQ2|C2AIL_HUMAN CDKN2AIP N-terminal-like protein OS=Homo sapiens OX=9606 GN=CDKN2AIPNL PE=1 SV=1	1	3	3	3	0	1	1	1	0	2	0	1	1	1	0	2	0	1	1	1	0	2	40.5	40.5	40.5	13.196	116	116	0	14.231		By MS/MS	By MS/MS	By MS/MS		By MS/MS	0	15.5	15.5	15.5	0	24.1
P42773	P42773	3	3	3	Cyclin-dependent kinase 4 inhibitor C	CDKN2C	sp|P42773|CDN2C_HUMAN Cyclin-dependent kinase 4 inhibitor C OS=Homo sapiens OX=9606 GN=CDKN2C PE=1 SV=1	1	3	3	3	0	0	1	0	0	1	0	0	1	0	0	1	0	0	1	0	0	1	27.4	27.4	27.4	18.127	168	168	0	46.766			By MS/MS			By MS/MS	0	0	8.3	0	0	4.8
A0A087WTJ6;P47902;Q99626	A0A087WTJ6;P47902;Q99626	3;3;3	2;2;2	2;2;2	Homeobox protein CDX-1;Homeobox protein CDX-2	CDX1;CDX2	tr|A0A087WTJ6|A0A087WTJ6_HUMAN Homeobox protein CDX-1 OS=Homo sapiens OX=9606 GN=CDX1 PE=1 SV=1;sp|P47902|CDX1_HUMAN Homeobox protein CDX-1 OS=Homo sapiens OX=9606 GN=CDX1 PE=1 SV=2;sp|Q99626|CDX2_HUMAN Homeobox protein CDX-2 OS=Homo sapiens OX=9606 GN=CDX	3	3	2	2	1	0	2	1	0	2	0	0	2	0	0	1	0	0	2	0	0	1	16.9	12.3	12.3	17.418	154	154;265;313	0	2.8805	By matching		By MS/MS	By matching		By matching	4.5	0	12.3	4.5	0	16.9
P49454	P49454	1	1	1	Centromere protein F	CENPF	sp|P49454|CENPF_HUMAN Centromere protein F OS=Homo sapiens OX=9606 GN=CENPF PE=1 SV=3	1	1	1	1	0	0	1	0	0	0	0	0	1	0	0	0	0	0	1	0	0	0	0.4	0.4	0.4	357.52	3114	3114	0.0091954	0.98152			By MS/MS				0	0	0.4	0	0	0
Q5TB80	Q5TB80	1	1	1	Centrosomal protein of 162 kDa	CEP162	sp|Q5TB80|CE162_HUMAN Centrosomal protein of 162 kDa OS=Homo sapiens OX=9606 GN=CEP162 PE=1 SV=2	1	1	1	1	0	0	1	0	0	1	0	0	1	0	0	1	0	0	1	0	0	1	1.7	1.7	1.7	161.94	1403	1403	0.0025784	1.4606			By MS/MS			By MS/MS	0	0	1.7	0	0	1.7
A0A0A0MS84;A0A338VFC5;Q9Y592;F8VYN8	A0A0A0MS84;A0A338VFC5;Q9Y592	4;4;4;1	4;4;4;1	4;4;4;1	Centrosomal protein of 83 kDa	CEP83	tr|A0A0A0MS84|A0A0A0MS84_HUMAN Centrosomal protein of 83 kDa OS=Homo sapiens OX=9606 GN=CEP83 PE=1 SV=1;tr|A0A338VFC5|A0A338VFC5_HUMAN Centrosomal protein of 83 kDa OS=Homo sapiens OX=9606 GN=CEP83 PE=1 SV=1;sp|Q9Y592|CEP83_HUMAN Centrosomal protein of 83	4	4	4	4	0	0	1	1	1	1	0	0	1	1	1	1	0	0	1	1	1	1	12.7	12.7	12.7	56.055	472	472;568;701;352	0.00046232	1.9713			By MS/MS	By matching	By matching	By MS/MS	0	0	3	3	3	3
A0A0C4DGH1;Q5XG92	A0A0C4DGH1;Q5XG92	1;1	1;1	1;1	Carboxylic ester hydrolase;Carboxylesterase 4A	CES4A	tr|A0A0C4DGH1|A0A0C4DGH1_HUMAN Carboxylic ester hydrolase (Fragment) OS=Homo sapiens OX=9606 GN=CES4A PE=1 SV=1;sp|Q5XG92|EST4A_HUMAN Carboxylesterase 4A OS=Homo sapiens OX=9606 GN=CES4A PE=2 SV=2	2	1	1	1	0	0	1	0	0	0	0	0	1	0	0	0	0	0	1	0	0	0	5.3	5.3	5.3	51.23	454	454;561	0.0078309	1.0729			By MS/MS				0	0	5.3	0	0	0
P41208;Q12798	P41208	4;1	4;1	4;1	Centrin-2	CETN2	sp|P41208|CETN2_HUMAN Centrin-2 OS=Homo sapiens OX=9606 GN=CETN2 PE=1 SV=1	2	4	4	4	0	0	3	0	0	3	0	0	3	0	0	3	0	0	3	0	0	3	26.7	26.7	26.7	19.738	172	172;172	0	12.608			By MS/MS			By MS/MS	0	0	16.9	0	0	19.2
B5MCA1;Q96G28;B5MC35;B5MD16	B5MCA1;Q96G28;B5MC35;B5MD16	2;2;1;1	2;2;1;1	2;2;1;1	Cilia- and flagella-associated protein 36	CFAP36	tr|B5MCA1|B5MCA1_HUMAN Cilia- and flagella-associated protein 36 OS=Homo sapiens OX=9606 GN=CFAP36 PE=1 SV=1;sp|Q96G28|CFA36_HUMAN Cilia- and flagella-associated protein 36 OS=Homo sapiens OX=9606 GN=CFAP36 PE=1 SV=2;tr|B5MC35|B5MC35_HUMAN Cilia- and flage	4	2	2	2	1	0	1	0	1	1	1	0	1	0	1	1	1	0	1	0	1	1	10.9	10.9	10.9	36.138	313	313;342;218;223	0	5.8288	By MS/MS		By matching		By MS/MS	By MS/MS	4.2	0	6.7	0	4.2	6.7
Q9UEE9	Q9UEE9	1	1	1	Craniofacial development protein 1	CFDP1	sp|Q9UEE9|CFDP1_HUMAN Craniofacial development protein 1 OS=Homo sapiens OX=9606 GN=CFDP1 PE=1 SV=1	1	1	1	1	1	0	0	1	1	0	1	0	0	1	1	0	1	0	0	1	1	0	7.7	7.7	7.7	33.592	299	299	0	4.1743	By MS/MS			By matching	By MS/MS		7.7	0	0	7.7	7.7	0
Q9BUX1	Q9BUX1	2	2	2	Glutathione-specific gamma-glutamylcyclotransferase 1	CHAC1	sp|Q9BUX1|CHAC1_HUMAN Glutathione-specific gamma-glutamylcyclotransferase 1 OS=Homo sapiens OX=9606 GN=CHAC1 PE=1 SV=3	1	2	2	2	0	0	2	0	0	1	0	0	2	0	0	1	0	0	2	0	0	1	12.2	12.2	12.2	24.417	222	222	0	2.6048			By MS/MS			By MS/MS	0	0	12.2	0	0	5.4
Q8N4Q1	Q8N4Q1	1	1	1	Mitochondrial intermembrane space import and assembly protein 40	CHCHD4	sp|Q8N4Q1|MIA40_HUMAN Mitochondrial intermembrane space import and assembly protein 40 OS=Homo sapiens OX=9606 GN=CHCHD4 PE=1 SV=1	1	1	1	1	0	0	1	0	0	1	0	0	1	0	0	1	0	0	1	0	0	1	16.2	16.2	16.2	15.996	142	142	0	11.192			By MS/MS			By MS/MS	0	0	16.2	0	0	16.2
H7C294;Q8TD26	H7C294;Q8TD26	1;1	1;1	1;1	Chromodomain-helicase-DNA-binding protein 6	CHD6	tr|H7C294|H7C294_HUMAN DNA helicase (Fragment) OS=Homo sapiens OX=9606 GN=CHD6 PE=1 SV=1;sp|Q8TD26|CHD6_HUMAN Chromodomain-helicase-DNA-binding protein 6 OS=Homo sapiens OX=9606 GN=CHD6 PE=1 SV=4	2	1	1	1	0	0	0	0	0	0	0	0	0	0	0	0	0	0	0	0	0	0	3.2	3.2	3.2	61.384	525	525;2715	1	-2							0	0	0	0	0	0
C9J0A7;Q9UQN3;A0A087WW88	C9J0A7;Q9UQN3;A0A087WW88	2;2;1	2;2;1	2;2;1	Charged multivesicular body protein 2b	CHMP2B	tr|C9J0A7|C9J0A7_HUMAN Charged multivesicular body protein 2b OS=Homo sapiens OX=9606 GN=CHMP2B PE=1 SV=1;sp|Q9UQN3|CHM2B_HUMAN Charged multivesicular body protein 2b OS=Homo sapiens OX=9606 GN=CHMP2B PE=1 SV=1;tr|A0A087WW88|A0A087WW88_HUMAN Charged multiv	3	2	2	2	0	0	0	0	0	2	0	0	0	0	0	2	0	0	0	0	0	2	13.1	13.1	13.1	20.772	183	183;213;229	0.00090009	1.7951						By MS/MS	0	0	0	0	0	13.1
A0A0C4DGJ7;Q8WUH1;H0YIM9;H0YID9;H0YHA3	A0A0C4DGJ7;Q8WUH1;H0YIM9	3;3;2;1;1	2;2;2;0;0	2;2;2;0;0	Protein Churchill	CHURC1;CHURC1-FNTB	tr|A0A0C4DGJ7|A0A0C4DGJ7_HUMAN Protein Churchill OS=Homo sapiens OX=9606 GN=CHURC1 PE=3 SV=1;sp|Q8WUH1|CHUR_HUMAN Protein Churchill OS=Homo sapiens OX=9606 GN=CHURC1 PE=1 SV=2;tr|H0YIM9|H0YIM9_HUMAN Protein Churchill (Fragment) OS=Homo sapiens OX=9606 GN=C	5	3	2	2	0	0	2	0	0	3	0	0	1	0	0	2	0	0	1	0	0	2	33	17	17	12.887	112	112;139;85;95;126	0	3.0188			By MS/MS			By MS/MS	0	0	27.7	0	0	33
B4DL54	B4DL54	3	1	0		CHURC1-FNTB	tr|B4DL54|B4DL54_HUMAN Protein farnesyltransferase subunit beta OS=Homo sapiens OX=9606 GN=CHURC1-FNTB PE=2 SV=1	1	3	1	0	0	0	1	0	0	1	0	0	1	0	0	1	0	0	0	0	0	0	9.8	3.8	0	52.785	471	471	0	3.8369			By MS/MS			By MS/MS	0	0	3.8	0	0	3.8
O76071	O76071	7	7	7	Probable cytosolic iron-sulfur protein assembly protein CIAO1	CIAO1	sp|O76071|CIAO1_HUMAN Probable cytosolic iron-sulfur protein assembly protein CIAO1 OS=Homo sapiens OX=9606 GN=CIAO1 PE=1 SV=1	1	7	7	7	1	0	4	1	1	5	1	0	4	1	1	5	1	0	4	1	1	5	33.9	33.9	33.9	37.84	339	339	0	25.347	By matching		By MS/MS	By matching	By MS/MS	By MS/MS	4.7	0	17.4	4.7	4.7	22.1
O14578;A0A7I2V365;A0A7I2V4A6;A0A7I2V4I0;A0A7I2V692;A0A7I2V4H7;H7BYJ3;A0A7I2V2G7;A0A7I2YQJ8	O14578;A0A7I2V365;A0A7I2V4A6;A0A7I2V4I0;A0A7I2V692;A0A7I2V4H7;H7BYJ3	4;3;3;3;3;3;3;1;1	4;3;3;3;3;3;3;1;1	4;3;3;3;3;3;3;1;1	Citron Rho-interacting kinase	CIT	sp|O14578|CTRO_HUMAN Citron Rho-interacting kinase OS=Homo sapiens OX=9606 GN=CIT PE=1 SV=2;tr|A0A7I2V365|A0A7I2V365_HUMAN Citron Rho-interacting kinase OS=Homo sapiens OX=9606 GN=CIT PE=1 SV=1;tr|A0A7I2V4A6|A0A7I2V4A6_HUMAN Citron Rho-interacting kinase O	9	4	4	4	0	0	3	0	0	1	0	0	3	0	0	1	0	0	3	0	0	1	3	3	3	231.43	2027	2027;1537;1566;1603;1608;1617;1640;206;507	0	4.8948			By MS/MS			By MS/MS	0	0	2.1	0	0	0.9
H7C2S6;C9J7P8;C9J300;C9JRD8;A0A3B3IRV1;Q99966	H7C2S6;C9J7P8;C9J300;C9JRD8;A0A3B3IRV1;Q99966	1;1;1;1;1;1	1;1;1;1;1;1	1;1;1;1;1;1	Cbp/p300-interacting transactivator 1	CITED1	tr|H7C2S6|H7C2S6_HUMAN Cbp/p300-interacting transactivator 1 (Fragment) OS=Homo sapiens OX=9606 GN=CITED1 PE=1 SV=1;tr|C9J7P8|C9J7P8_HUMAN Cbp/p300-interacting transactivator 1 (Fragment) OS=Homo sapiens OX=9606 GN=CITED1 PE=1 SV=2;tr|C9J300|C9J300_HUMAN C	6	1	1	1	0	0	1	0	0	0	0	0	1	0	0	0	0	0	1	0	0	0	15.1	15.1	15.1	11.207	106	106;109;138;140;556;193	1	-2			By matching				0	0	15.1	0	0	0
Q07065	Q07065	2	2	2	Cytoskeleton-associated protein 4	CKAP4	sp|Q07065|CKAP4_HUMAN Cytoskeleton-associated protein 4 OS=Homo sapiens OX=9606 GN=CKAP4 PE=1 SV=2	1	2	2	2	0	0	0	1	1	0	0	0	0	1	1	0	0	0	0	1	1	0	5.6	5.6	5.6	66.022	602	602	0	4.6002				By MS/MS	By MS/MS		0	0	0	3	3	0
C9JSQ1;F8WCN3;P12532;C9J6W7;C9JT96	C9JSQ1;F8WCN3;P12532;C9J6W7;C9JT96	3;3;3;2;2	3;3;3;2;2	3;3;3;2;2	Creatine kinase U-type, mitochondrial	CKMT1B;CKMT1A	tr|C9JSQ1|C9JSQ1_HUMAN Creatine kinase (Fragment) OS=Homo sapiens OX=9606 GN=CKMT1B PE=1 SV=1;tr|F8WCN3|F8WCN3_HUMAN Creatine kinase OS=Homo sapiens OX=9606 GN=CKMT1A PE=1 SV=1;sp|P12532|KCRU_HUMAN Creatine kinase U-type, mitochondrial OS=Homo sapiens OX=9	5	3	3	3	1	1	1	1	1	2	1	1	1	1	1	2	1	1	1	1	1	2	16.6	16.6	16.6	26.721	241	241;298;417;203;221	0	4.0702	By MS/MS	By matching	By MS/MS	By MS/MS	By matching	By matching	5.4	5.4	6.6	5.4	5.4	12
A0A2R8Y4M1;A0A5F9ZHK1;A0A2R8YGW2;A0A2R8Y615;Q9NZA1	A0A2R8Y4M1;A0A5F9ZHK1;A0A2R8YGW2;A0A2R8Y615;Q9NZA1	2;2;2;2;2	2;2;2;2;2	2;2;2;2;2	Chloride intracellular channel protein 5	CLIC5	tr|A0A2R8Y4M1|A0A2R8Y4M1_HUMAN Chloride intracellular channel protein 5 OS=Homo sapiens OX=9606 GN=CLIC5 PE=1 SV=1;tr|A0A5F9ZHK1|A0A5F9ZHK1_HUMAN Chloride intracellular channel protein 5 OS=Homo sapiens OX=9606 GN=CLIC5 PE=1 SV=1;tr|A0A2R8YGW2|A0A2R8YGW2_H	5	2	2	2	0	1	0	1	0	0	0	1	0	1	0	0	0	1	0	1	0	0	15.5	15.5	15.5	22.284	200	200;219;222;242;410	0.0077882	1.0532		By MS/MS		By MS/MS			0	9	0	9	0	0
G3XAK3;B5MCH3;Q8N3C7	G3XAK3;B5MCH3;Q8N3C7	1;1;1	1;1;1	1;1;1	CAP-Gly domain-containing linker protein 4	CLIP4	tr|G3XAK3|G3XAK3_HUMAN CAP-Gly domain-containing linker protein 4 OS=Homo sapiens OX=9606 GN=CLIP4 PE=1 SV=1;tr|B5MCH3|B5MCH3_HUMAN CAP-Gly domain-containing linker protein 4 OS=Homo sapiens OX=9606 GN=CLIP4 PE=1 SV=1;sp|Q8N3C7|CLIP4_HUMAN CAP-Gly domain-c	3	1	1	1	0	0	1	0	0	1	0	0	1	0	0	1	0	0	1	0	0	1	1.8	1.8	1.8	53.758	495	495;571;705	0.0033417	1.326			By MS/MS			By MS/MS	0	0	1.8	0	0	1.8
A0A2R8Y602;A0A2U3TZY2;H0YGM0;Q9H078;A0A2R8YDH5;F5H392;F5H7A5;A0A2R8Y6R5	A0A2R8Y602;A0A2U3TZY2;H0YGM0;Q9H078;A0A2R8YDH5;F5H392;F5H7A5;A0A2R8Y6R5	2;2;2;2;1;1;1;1	2;2;2;2;1;1;1;1	2;2;2;2;1;1;1;1	Caseinolytic peptidase B protein homolog	CLPB	tr|A0A2R8Y602|A0A2R8Y602_HUMAN Caseinolytic peptidase B protein homolog (Fragment) OS=Homo sapiens OX=9606 GN=CLPB PE=1 SV=1;tr|A0A2U3TZY2|A0A2U3TZY2_HUMAN Caseinolytic peptidase B protein homolog OS=Homo sapiens OX=9606 GN=CLPB PE=1 SV=1;tr|H0YGM0|H0YGM0_	8	2	2	2	0	0	1	0	0	1	0	0	1	0	0	1	0	0	1	0	0	1	7.1	7.1	7.1	43.351	382	382;692;712;707;141;149;152;327	0.00088613	1.6557			By MS/MS			By matching	0	0	3.9	0	0	3.9
K7EIG1;I3L2B0;A0A494C0R8;O75153	K7EIG1;I3L2B0;A0A494C0R8;O75153	3;3;3;3	3;3;3;3	3;3;3;3	Clustered mitochondria protein homolog	CLUH	tr|K7EIG1|K7EIG1_HUMAN Clustered mitochondria protein homolog (Fragment) OS=Homo sapiens OX=9606 GN=CLUH PE=1 SV=2;tr|I3L2B0|I3L2B0_HUMAN Clustered mitochondria protein homolog OS=Homo sapiens OX=9606 GN=CLUH PE=1 SV=3;tr|A0A494C0R8|A0A494C0R8_HUMAN Cluste	4	3	3	3	0	0	2	1	1	2	0	0	2	1	1	2	0	0	2	1	1	2	2.3	2.3	2.3	140.49	1251	1251;1297;1348;1309	0	2.5431			By MS/MS	By MS/MS	By matching	By MS/MS	0	0	1.4	1.8	1.8	1.4
J3KSV5;A0A087WYZ1;J3QKT2;Q96KP4;J3QQN6;J3QR27;J3QLU1;A0A087WVS2;J3QKQ0;J3QRD0;J3QL02;J3KSS4;J3KRD5;J3QRP4;J3QRA8;J3QRH4	J3KSV5;A0A087WYZ1;J3QKT2;Q96KP4;J3QQN6;J3QR27;J3QLU1;A0A087WVS2;J3QKQ0;J3QRD0;J3QL02	3;3;3;3;2;2;2;2;2;2;2;1;1;1;1;1	3;3;3;3;2;2;2;2;2;2;2;1;1;1;1;1	3;3;3;3;2;2;2;2;2;2;2;1;1;1;1;1	Cytosolic non-specific dipeptidase	CNDP2	tr|J3KSV5|J3KSV5_HUMAN Cytosolic non-specific dipeptidase (Fragment) OS=Homo sapiens OX=9606 GN=CNDP2 PE=1 SV=1;tr|A0A087WYZ1|A0A087WYZ1_HUMAN Cytosolic non-specific dipeptidase OS=Homo sapiens OX=9606 GN=CNDP2 PE=1 SV=1;tr|J3QKT2|J3QKT2_HUMAN Cytosolic no	16	3	3	3	0	0	3	0	0	2	0	0	3	0	0	2	0	0	3	0	0	2	31.5	31.5	31.5	16.483	149	149;157;249;475;89;122;123;124;128;134;138;55;88;89;138;204	0	3.3249			By MS/MS			By MS/MS	0	0	31.5	0	0	26.2
K7ENC5;B7Z7E1	K7ENC5;B7Z7E1	1;1	1;1	1;1	Calponin	CNN1	tr|K7ENC5|K7ENC5_HUMAN Calponin-1 (Fragment) OS=Homo sapiens OX=9606 GN=CNN1 PE=1 SV=1;tr|B7Z7E1|B7Z7E1_HUMAN Calponin OS=Homo sapiens OX=9606 GN=CNN1 PE=1 SV=1	2	1	1	1	0	0	1	0	0	0	0	0	1	0	0	0	0	0	1	0	0	0	12.9	12.9	12.9	13.054	116	116;247	1	-2			By MS/MS				0	0	12.9	0	0	0
A5YKK6;H3BMZ2	A5YKK6	5;1	5;1	5;1	CCR4-NOT transcription complex subunit 1	CNOT1	sp|A5YKK6|CNOT1_HUMAN CCR4-NOT transcription complex subunit 1 OS=Homo sapiens OX=9606 GN=CNOT1 PE=1 SV=2	2	5	5	5	0	0	1	0	0	3	0	0	1	0	0	3	0	0	1	0	0	3	2.3	2.3	2.3	266.94	2376	2376;439	0	2.4382			By MS/MS			By MS/MS	0	0	0.6	0	0	1.4
Q9H9A5;H7C1X9;H7C0K1;E9PCN5	Q9H9A5;H7C1X9;H7C0K1;E9PCN5	2;1;1;1	2;1;1;1	2;1;1;1	CCR4-NOT transcription complex subunit 10	CNOT10	sp|Q9H9A5|CNO10_HUMAN CCR4-NOT transcription complex subunit 10 OS=Homo sapiens OX=9606 GN=CNOT10 PE=1 SV=1;tr|H7C1X9|H7C1X9_HUMAN CCR4-NOT transcription complex subunit 10 (Fragment) OS=Homo sapiens OX=9606 GN=CNOT10 PE=1 SV=1;tr|H7C0K1|H7C0K1_HUMAN CCR4-	4	2	2	2	0	0	1	0	0	1	0	0	1	0	0	1	0	0	1	0	0	1	3.8	3.8	3.8	82.309	744	744;210;229;609	0	3.2903			By MS/MS			By MS/MS	0	0	1.6	0	0	1.6
H7C0C7;Q9UKZ1	H7C0C7;Q9UKZ1	1;1	1;1	1;1	CCR4-NOT transcription complex subunit 11	CNOT11	tr|H7C0C7|H7C0C7_HUMAN CCR4-NOT transcription complex subunit 11 (Fragment) OS=Homo sapiens OX=9606 GN=CNOT11 PE=1 SV=1;sp|Q9UKZ1|CNO11_HUMAN CCR4-NOT transcription complex subunit 11 OS=Homo sapiens OX=9606 GN=CNOT11 PE=1 SV=1	2	1	1	1	0	1	1	1	1	1	0	1	1	1	1	1	0	1	1	1	1	1	15.7	15.7	15.7	14.248	127	127;510	0.0029648	1.3917		By MS/MS	By MS/MS	By MS/MS	By MS/MS	By MS/MS	0	15.7	15.7	15.7	15.7	15.7
O95628	O95628	4	4	4	CCR4-NOT transcription complex subunit 4	CNOT4	sp|O95628|CNOT4_HUMAN CCR4-NOT transcription complex subunit 4 OS=Homo sapiens OX=9606 GN=CNOT4 PE=1 SV=3	1	4	4	4	0	0	4	0	0	4	0	0	4	0	0	4	0	0	4	0	0	4	11.1	11.1	11.1	63.509	575	575	0	140.58			By MS/MS			By MS/MS	0	0	11.1	0	0	11.1
B7Z9U0;Q9UFF9;E5RIL2	B7Z9U0;Q9UFF9;E5RIL2	3;3;2	3;3;2	3;3;2	CCR4-NOT transcription complex subunit 8	CNOT8	tr|B7Z9U0|B7Z9U0_HUMAN Poly(A)-specific ribonuclease OS=Homo sapiens OX=9606 GN=CNOT8 PE=1 SV=1;sp|Q9UFF9|CNOT8_HUMAN CCR4-NOT transcription complex subunit 8 OS=Homo sapiens OX=9606 GN=CNOT8 PE=1 SV=1;tr|E5RIL2|E5RIL2_HUMAN Poly(A)-specific ribonuclease (	3	3	3	3	0	0	3	0	0	1	0	0	3	0	0	1	0	0	3	0	0	1	30.5	30.5	30.5	14.656	128	128;292;225	0	36.409			By MS/MS			By MS/MS	0	0	30.5	0	0	17.2
P09543;K7EN66;C9K0L8;K7ERZ0;K7ERC4	P09543	3;1;1;1;1	3;1;1;1;1	3;1;1;1;1	2,3-cyclic-nucleotide 3-phosphodiesterase	CNP	sp|P09543|CN37_HUMAN 2,3-cyclic-nucleotide 3-phosphodiesterase OS=Homo sapiens OX=9606 GN=CNP PE=1 SV=2	5	3	3	3	0	0	1	0	0	2	0	0	1	0	0	2	0	0	1	0	0	2	14.5	14.5	14.5	47.578	421	421;120;144;153;164	0	25.102			By MS/MS			By MS/MS	0	0	2.9	0	0	9
Q9Y2B0;H0YI18;F8W1K5;F8VXJ7;F8W031	Q9Y2B0;H0YI18;F8W1K5;F8VXJ7;F8W031	2;1;1;1;1	2;1;1;1;1	2;1;1;1;1	Protein canopy homolog 2	CNPY2	sp|Q9Y2B0|CNPY2_HUMAN Protein canopy homolog 2 OS=Homo sapiens OX=9606 GN=CNPY2 PE=1 SV=1;tr|H0YI18|H0YI18_HUMAN Protein canopy homolog 2 (Fragment) OS=Homo sapiens OX=9606 GN=CNPY2 PE=1 SV=1;tr|F8W1K5|F8W1K5_HUMAN Protein canopy homolog 2 (Fragment) OS=Ho	5	2	2	2	0	0	1	0	2	0	0	0	1	0	2	0	0	0	1	0	2	0	17.6	17.6	17.6	20.652	182	182;80;102;168;263	0.00046751	2.0629			By matching		By MS/MS		0	0	8.8	0	17.6	0
Q9NXG0	Q9NXG0	1	1	1	Centlein	CNTLN	sp|Q9NXG0|CNTLN_HUMAN Centlein OS=Homo sapiens OX=9606 GN=CNTLN PE=1 SV=6	1	1	1	1	0	0	0	0	0	0	0	0	0	0	0	0	0	0	0	0	0	0	1.4	1.4	1.4	161.57	1405	1405	0	16.966							0	0	0	0	0	0
Q9NYJ1	Q9NYJ1	1	1	1	Cytochrome c oxidase assembly factor 4 homolog, mitochondrial	COA4	sp|Q9NYJ1|COA4_HUMAN Cytochrome c oxidase assembly factor 4 homolog, mitochondrial OS=Homo sapiens OX=9606 GN=COA4 PE=1 SV=2	1	1	1	1	1	1	0	0	1	0	1	1	0	0	1	0	1	1	0	0	1	0	14.9	14.9	14.9	10.134	87	87	0	3.1122	By MS/MS	By matching			By MS/MS		14.9	14.9	0	0	14.9	0
P39060;H7BXV5;H7C457	P39060;H7BXV5;H7C457	10;7;5	10;7;5	10;7;5	Collagen alpha-1(XVIII) chain;Endostatin	COL18A1	sp|P39060|COIA1_HUMAN Collagen alpha-1(XVIII) chain OS=Homo sapiens OX=9606 GN=COL18A1 PE=1 SV=5;tr|H7BXV5|H7BXV5_HUMAN Collagen alpha-1(XVIII) chain (Fragment) OS=Homo sapiens OX=9606 GN=COL18A1 PE=1 SV=1;tr|H7C457|H7C457_HUMAN Collagen alpha-1(XVIII) cha	3	10	10	10	6	0	0	0	9	1	6	0	0	0	9	1	6	0	0	0	9	1	7.5	7.5	7.5	178.19	1754	1754;687;280	0	23.79	By MS/MS				By MS/MS	By MS/MS	6.1	0	0	0	6.5	0.6
Q5KU26	Q5KU26	1	1	1	Collectin-12	COLEC12	sp|Q5KU26|COL12_HUMAN Collectin-12 OS=Homo sapiens OX=9606 GN=COLEC12 PE=1 SV=3	1	1	1	1	0	0	0	1	1	1	0	0	0	1	1	1	0	0	0	1	1	1	2.6	2.6	2.6	81.514	742	742	0	2.8034				By MS/MS	By MS/MS	By MS/MS	0	0	0	2.6	2.6	2.6
Q8N668;H7C377;H0Y7J4;H7C169;E9PE85	Q8N668	4;1;1;1;1	4;1;1;1;1	4;1;1;1;1	COMM domain-containing protein 1	COMMD1	sp|Q8N668|COMD1_HUMAN COMM domain-containing protein 1 OS=Homo sapiens OX=9606 GN=COMMD1 PE=1 SV=1	5	4	4	4	0	0	1	0	0	3	0	0	1	0	0	3	0	0	1	0	0	3	36.8	36.8	36.8	21.178	190	190;32;38;50;98	0	63.21			By MS/MS			By MS/MS	0	0	9.5	0	0	29.5
D6RC04;Q9Y6G5	D6RC04;Q9Y6G5	1;1	1;1	1;1	COMM domain-containing protein 10	COMMD10	tr|D6RC04|D6RC04_HUMAN COMM domain-containing protein 10 OS=Homo sapiens OX=9606 GN=COMMD10 PE=1 SV=1;sp|Q9Y6G5|COMDA_HUMAN COMM domain-containing protein 10 OS=Homo sapiens OX=9606 GN=COMMD10 PE=1 SV=1	2	1	1	1	0	0	1	0	0	1	0	0	1	0	0	1	0	0	1	0	0	1	6.5	6.5	6.5	15.911	139	139;202	0.00045372	1.85			By matching			By matching	0	0	6.5	0	0	6.5
H0Y4W0;Q9UBI1;R4GNF2;H0Y4E5	H0Y4W0;Q9UBI1	3;3;1;1	1;1;1;1	1;1;1;1	COMM domain-containing protein 3	COMMD3	tr|H0Y4W0|H0Y4W0_HUMAN COMM domain-containing protein 3 (Fragment) OS=Homo sapiens OX=9606 GN=COMMD3 PE=1 SV=1;sp|Q9UBI1|COMD3_HUMAN COMM domain-containing protein 3 OS=Homo sapiens OX=9606 GN=COMMD3 PE=1 SV=1	4	3	1	1	0	0	2	0	1	3	0	0	1	0	0	1	0	0	1	0	0	1	27.6	6.7	6.7	18.183	163	163;195;74;149	0.0052889	1.2141			By MS/MS		By matching	By MS/MS	0	0	14.1	0	7.4	27.6
Q7Z4G1	Q7Z4G1	1	1	1	COMM domain-containing protein 6	COMMD6	sp|Q7Z4G1|COMD6_HUMAN COMM domain-containing protein 6 OS=Homo sapiens OX=9606 GN=COMMD6 PE=1 SV=1	1	1	1	1	0	0	1	0	0	0	0	0	1	0	0	0	0	0	1	0	0	0	15.3	15.3	15.3	9.638	85	85	0	8.7827			By MS/MS				0	0	15.3	0	0	0
Q9NX08	Q9NX08	4	4	4	COMM domain-containing protein 8	COMMD8	sp|Q9NX08|COMD8_HUMAN COMM domain-containing protein 8 OS=Homo sapiens OX=9606 GN=COMMD8 PE=1 SV=1	1	4	4	4	0	0	4	0	0	4	0	0	4	0	0	4	0	0	4	0	0	4	19.1	19.1	19.1	21.09	183	183	0	3.6016			By MS/MS			By MS/MS	0	0	19.1	0	0	19.1
E9PJ95;Q9P000	E9PJ95;Q9P000	1;1	1;1	1;1	COMM domain-containing protein 9	COMMD9	tr|E9PJ95|E9PJ95_HUMAN COMM domain-containing protein 9 OS=Homo sapiens OX=9606 GN=COMMD9 PE=1 SV=1;sp|Q9P000|COMD9_HUMAN COMM domain-containing protein 9 OS=Homo sapiens OX=9606 GN=COMMD9 PE=1 SV=2	2	1	1	1	0	0	1	0	0	0	0	0	1	0	0	0	0	0	1	0	0	0	8.6	8.6	8.6	20.687	185	185;198	0	10.513			By MS/MS				0	0	8.6	0	0	0
A0A7I2V370;P21964	A0A7I2V370;P21964	2;2	2;2	2;2	Catechol O-methyltransferase	COMT	tr|A0A7I2V370|A0A7I2V370_HUMAN Catechol O-methyltransferase OS=Homo sapiens OX=9606 GN=COMT PE=1 SV=1;sp|P21964|COMT_HUMAN Catechol O-methyltransferase OS=Homo sapiens OX=9606 GN=COMT PE=1 SV=2	2	2	2	2	0	0	2	0	0	1	0	0	2	0	0	1	0	0	2	0	0	1	7.6	7.6	7.6	33.483	302	302;271	0	4.4553			By MS/MS			By MS/MS	0	0	7.6	0	0	7.6
P53621;A0A3B3IS84;A0A3B3ISC6;A0A3B3IT15;A0A3B3IU89;A0A3B3ITV3;A0A3B3ITI7;A0A3B3ISK1;A0A3B3IU78	P53621;A0A3B3IS84;A0A3B3ISC6;A0A3B3IT15;A0A3B3IU89	23;22;21;21;13;11;7;7;3	23;22;21;21;13;11;7;7;3	23;22;21;21;13;11;7;7;3	Coatomer subunit alpha;Xenin;Proxenin	COPA	sp|P53621|COPA_HUMAN Coatomer subunit alpha OS=Homo sapiens OX=9606 GN=COPA PE=1 SV=2;tr|A0A3B3IS84|A0A3B3IS84_HUMAN Coatomer subunit alpha OS=Homo sapiens OX=9606 GN=COPA PE=1 SV=1;tr|A0A3B3ISC6|A0A3B3ISC6_HUMAN Coatomer subunit alpha (Fragment) OS=Homo s	9	23	23	23	0	1	18	1	2	16	0	1	18	1	2	16	0	1	18	1	2	16	24.1	24.1	24.1	138.34	1224	1224;1204;1024;1204;682;609;452;455;121	0	42.476		By MS/MS	By MS/MS	By MS/MS	By matching	By MS/MS	0	1.2	21.1	1.2	2.5	18.1
P53618;E9PP73;E9PP63;E9PKQ1	P53618;E9PP73	9;5;1;1	9;5;1;1	9;5;1;1	Coatomer subunit beta	COPB1	sp|P53618|COPB_HUMAN Coatomer subunit beta OS=Homo sapiens OX=9606 GN=COPB1 PE=1 SV=3;tr|E9PP73|E9PP73_HUMAN Coatomer subunit beta (Fragment) OS=Homo sapiens OX=9606 GN=COPB1 PE=1 SV=8	4	9	9	9	0	0	4	0	1	4	0	0	4	0	1	4	0	0	4	0	1	4	15.3	15.3	15.3	107.14	953	953;485;132;137	0	23.725			By MS/MS		By matching	By MS/MS	0	0	6.3	0	1.3	6
Q9Y678	Q9Y678	8	8	6	Coatomer subunit gamma-1	COPG1	sp|Q9Y678|COPG1_HUMAN Coatomer subunit gamma-1 OS=Homo sapiens OX=9606 GN=COPG1 PE=1 SV=1	1	8	8	6	2	1	7	1	1	5	2	1	7	1	1	5	2	1	5	1	1	3	14.3	14.3	11	97.717	874	874	0	41.179	By matching	By MS/MS	By MS/MS	By MS/MS	By MS/MS	By MS/MS	4.2	1.9	12	1.9	1.9	8.8
Q9UBF2	Q9UBF2	3	1	1	Coatomer subunit gamma-2	COPG2	sp|Q9UBF2|COPG2_HUMAN Coatomer subunit gamma-2 OS=Homo sapiens OX=9606 GN=COPG2 PE=1 SV=1	1	3	1	1	0	0	3	0	0	3	0	0	1	0	0	1	0	0	1	0	0	1	5.3	2	2	97.621	871	871	0	8.7409			By MS/MS			By MS/MS	0	0	5.3	0	0	5.3
P61201;H0YKU5;B4DIH5;H0YM03	P61201;H0YKU5;B4DIH5	3;2;2;1	3;2;2;1	3;2;2;1	COP9 signalosome complex subunit 2	COPS2	sp|P61201|CSN2_HUMAN COP9 signalosome complex subunit 2 OS=Homo sapiens OX=9606 GN=COPS2 PE=1 SV=1;tr|H0YKU5|H0YKU5_HUMAN COP9 signalosome complex subunit 2 (Fragment) OS=Homo sapiens OX=9606 GN=COPS2 PE=1 SV=1;tr|B4DIH5|B4DIH5_HUMAN COP9 signalosome compl	4	3	3	3	1	1	2	1	1	1	1	1	2	1	1	1	1	1	2	1	1	1	10.8	10.8	10.8	51.596	443	443;263;379;183	0	6.6823	By MS/MS	By MS/MS	By MS/MS	By MS/MS	By MS/MS	By matching	2.9	2.9	7.7	2.9	2.9	2.9
Q92905;E5RHH5;E5RHF2	Q92905;E5RHH5	6;5;2	6;5;2	6;5;2	COP9 signalosome complex subunit 5	COPS5	sp|Q92905|CSN5_HUMAN COP9 signalosome complex subunit 5 OS=Homo sapiens OX=9606 GN=COPS5 PE=1 SV=4;tr|E5RHH5|E5RHH5_HUMAN COP9 signalosome complex subunit 5 OS=Homo sapiens OX=9606 GN=COPS5 PE=1 SV=1	3	6	6	6	1	0	3	0	0	3	1	0	3	0	0	3	1	0	3	0	0	3	24.3	24.3	24.3	37.578	334	334;197;151	0	6.3263	By matching		By MS/MS			By MS/MS	3.3	0	11.4	0	0	14.1
Q7L5N1;E7EM64;H7C3T0	Q7L5N1;E7EM64	3;3;1	3;3;1	3;3;1	COP9 signalosome complex subunit 6	COPS6	sp|Q7L5N1|CSN6_HUMAN COP9 signalosome complex subunit 6 OS=Homo sapiens OX=9606 GN=COPS6 PE=1 SV=1;tr|E7EM64|E7EM64_HUMAN COP9 signalosome complex subunit 6 OS=Homo sapiens OX=9606 GN=COPS6 PE=1 SV=1	3	3	3	3	0	0	2	0	0	2	0	0	2	0	0	2	0	0	2	0	0	2	10.1	10.1	10.1	36.163	327	327;326;123	0	3.674			By MS/MS			By MS/MS	0	0	10.1	0	0	10.1
F5H4U8;F5H7C6;F5GYF7;F5H248;Q9UBW8;F5H4Z0;F5H3M6;G3XAP1;F5GXT7	F5H4U8;F5H7C6;F5GYF7;F5H248;Q9UBW8	3;3;3;3;3;1;1;1;1	3;3;3;3;3;1;1;1;1	3;3;3;3;3;1;1;1;1	COP9 signalosome complex subunit 7a	COPS7A	tr|F5H4U8|F5H4U8_HUMAN COP9 signalosome complex subunit 7a (Fragment) OS=Homo sapiens OX=9606 GN=COPS7A PE=1 SV=1;tr|F5H7C6|F5H7C6_HUMAN COP9 signalosome complex subunit 7a (Fragment) OS=Homo sapiens OX=9606 GN=COPS7A PE=1 SV=1;tr|F5GYF7|F5GYF7_HUMAN COP9	9	3	3	3	0	0	2	0	0	1	0	0	2	0	0	1	0	0	2	0	0	1	35.2	35.2	35.2	13.663	125	125;192;212;262;275;56;60;62;71	0	6.4372			By MS/MS			By MS/MS	0	0	20.8	0	0	14.4
A0A087X1P5;Q9H9Q2;J3QT95;J3QT73;J3KQ34;J3KQ41;J3KQV6;J3QT67;J3QT66;J3QT69;J3QT50;J3QT43	A0A087X1P5;Q9H9Q2;J3QT95;J3QT73;J3KQ34;J3KQ41	3;3;2;2;2;2;1;1;1;1;1;1	3;3;2;2;2;2;1;1;1;1;1;1	3;3;2;2;2;2;1;1;1;1;1;1	COP9 signalosome complex subunit 7b	COPS7B	tr|A0A087X1P5|A0A087X1P5_HUMAN COP9 signalosome complex subunit 7b OS=Homo sapiens OX=9606 GN=COPS7B PE=1 SV=1;sp|Q9H9Q2|CSN7B_HUMAN COP9 signalosome complex subunit 7b OS=Homo sapiens OX=9606 GN=COPS7B PE=1 SV=1;tr|J3QT95|J3QT95_HUMAN COP9 signalosome com	12	3	3	3	0	0	1	0	0	1	0	0	1	0	0	1	0	0	1	0	0	1	26.3	26.3	26.3	23.556	209	209;264;150;172;230;278;54;62;62;68;78;103	0	29.563			By MS/MS			By MS/MS	0	0	9.1	0	0	9.1
F8VVA7;P61923;F8W651;F8VXB1;F8W156;F8VYZ4;F8VYK5;F8VUC5;F8VXR1;F8VYE0	F8VVA7;P61923;F8W651;F8VXB1;F8W156;F8VYZ4	5;5;4;3;3;3;2;2;2;1	5;5;4;3;3;3;2;2;2;1	5;5;4;3;3;3;2;2;2;1	Coatomer subunit zeta-1	COPZ1	tr|F8VVA7|F8VVA7_HUMAN Coatomer subunit zeta OS=Homo sapiens OX=9606 GN=COPZ1 PE=1 SV=1;sp|P61923|COPZ1_HUMAN Coatomer subunit zeta-1 OS=Homo sapiens OX=9606 GN=COPZ1 PE=1 SV=1;tr|F8W651|F8W651_HUMAN Coatomer subunit zeta OS=Homo sapiens OX=9606 GN=COPZ1 P	10	5	5	5	0	1	3	0	0	3	0	1	3	0	0	3	0	1	3	0	0	3	36.4	36.4	36.4	22.34	198	198;177;119;92;107;163;89;95;138;164	0	25.103		By MS/MS	By MS/MS			By MS/MS	0	7.1	26.3	0	0	28.3
Q9BR76;A0A087WW53;F5H390;F5H0D2	Q9BR76;A0A087WW53;F5H390	3;2;2;1	3;2;2;1	3;2;2;1	Coronin-1B;Coronin	CORO1B	sp|Q9BR76|COR1B_HUMAN Coronin-1B OS=Homo sapiens OX=9606 GN=CORO1B PE=1 SV=1;tr|A0A087WW53|A0A087WW53_HUMAN Coronin OS=Homo sapiens OX=9606 GN=CORO1B PE=1 SV=1;tr|F5H390|F5H390_HUMAN Coronin OS=Homo sapiens OX=9606 GN=CORO1B PE=1 SV=1	4	3	3	3	0	0	1	0	0	1	0	0	1	0	0	1	0	0	1	0	0	1	11.9	11.9	11.9	54.234	489	489;260;282;139	0	5.0332			By MS/MS			By matching	0	0	3.3	0	0	3.3
P14854;A0A494C160;K7EQD3	P14854;A0A494C160;K7EQD3	2;2;1	2;2;1	2;2;1	Cytochrome c oxidase subunit 6B1	COX6B1	sp|P14854|CX6B1_HUMAN Cytochrome c oxidase subunit 6B1 OS=Homo sapiens OX=9606 GN=COX6B1 PE=1 SV=2;tr|A0A494C160|A0A494C160_HUMAN Cytochrome c oxidase subunit 6B1 (Fragment) OS=Homo sapiens OX=9606 GN=COX6B1 PE=1 SV=1;tr|K7EQD3|K7EQD3_HUMAN Cytochrome c ox	3	2	2	2	0	0	1	0	1	0	0	0	1	0	1	0	0	0	1	0	1	0	30.2	30.2	30.2	10.192	86	86;54;40	0.00047778	2.2143			By MS/MS		By matching		0	0	12.8	0	17.4	0
H0Y9D9;A0A590UJI5;E5RFP2;E5RJM0;B7ZLQ8;A0A5K1VW61;A0A5K1VW79;A0A5K1VW71;A0A5K1VW93;Q7Z5Q1;Q8NE35;Q17RY0	H0Y9D9;A0A590UJI5;E5RFP2;E5RJM0;B7ZLQ8;A0A5K1VW61;A0A5K1VW79;A0A5K1VW71;A0A5K1VW93;Q7Z5Q1;Q8NE35;Q17RY0	2;2;2;2;2;2;2;2;2;2;2;2	2;2;2;2;2;2;2;2;2;2;2;2	2;2;2;2;2;2;2;2;2;2;2;2	Cytoplasmic polyadenylation element-binding protein 2;Cytoplasmic polyadenylation element-binding protein 3;Cytoplasmic polyadenylation element-binding protein 4	CPEB2;CPEB4;CPEB3	tr|H0Y9D9|H0Y9D9_HUMAN Cytoplasmic polyadenylation element-binding protein 2 (Fragment) OS=Homo sapiens OX=9606 GN=CPEB2 PE=1 SV=1;tr|A0A590UJI5|A0A590UJI5_HUMAN Cytoplasmic polyadenylation element-binding protein 4 OS=Homo sapiens OX=9606 GN=CPEB4 PE=1 SV	12	2	2	2	0	0	2	0	0	1	0	0	2	0	0	1	0	0	2	0	0	1	16.8	16.8	16.8	18.644	167	167;295;339;639;704;996;999;1004;1026;589;698;729	0	3.6225			By MS/MS			By MS/MS	0	0	16.8	0	0	7.2
Q96FN4;H3BUC8	Q96FN4	3;1	2;1	2;1	Copine-2	CPNE2	sp|Q96FN4|CPNE2_HUMAN Copine-2 OS=Homo sapiens OX=9606 GN=CPNE2 PE=1 SV=3	2	3	2	2	0	0	2	0	0	1	0	0	1	0	0	0	0	0	1	0	0	0	7.3	5.7	5.7	61.189	548	548;281	0	4.541			By matching			By matching	0	0	4.6	0	0	1.6
O75131;A0A087WYQ3;A0A087WXR6;E5RHZ0;H0YB26;E5RFT7;A0A087WUS8;E7ENV7;Q8IYJ1;Q96A23;O95741;Q86YQ8;Q9HCH3;Q9UBL6	O75131;A0A087WYQ3	10;6;3;3;3;2;2;1;1;1;1;1;1;1	10;6;3;3;3;2;2;1;1;1;1;1;1;1	9;6;3;3;3;2;2;0;0;0;0;0;0;0	Copine-3	CPNE3	sp|O75131|CPNE3_HUMAN Copine-3 OS=Homo sapiens OX=9606 GN=CPNE3 PE=1 SV=1;tr|A0A087WYQ3|A0A087WYQ3_HUMAN Copine-3 (Fragment) OS=Homo sapiens OX=9606 GN=CPNE3 PE=1 SV=1	14	10	10	9	1	0	4	0	0	5	1	0	4	0	0	5	1	0	3	0	0	4	21.2	21.2	21.2	60.13	537	537;234;139;153;262;79;135;552;553;557;557;564;593;633	0	114.54	By matching		By MS/MS			By MS/MS	2	0	9.5	0	0	11.4
P36551	P36551	2	2	2	Oxygen-dependent coproporphyrinogen-III oxidase, mitochondrial	CPOX	sp|P36551|HEM6_HUMAN Oxygen-dependent coproporphyrinogen-III oxidase, mitochondrial OS=Homo sapiens OX=9606 GN=CPOX PE=1 SV=3	1	2	2	2	0	1	0	2	1	0	0	1	0	2	1	0	0	1	0	2	1	0	7	7	7	50.151	454	454	0.00046275	1.9909		By MS/MS		By matching	By matching		0	4.4	0	7	4.4	0
Q9BRF8	Q9BRF8	1	1	1	Serine/threonine-protein phosphatase CPPED1	CPPED1	sp|Q9BRF8|CPPED_HUMAN Serine/threonine-protein phosphatase CPPED1 OS=Homo sapiens OX=9606 GN=CPPED1 PE=1 SV=3	1	1	1	1	1	1	0	1	1	1	1	1	0	1	1	1	1	1	0	1	1	1	3.5	3.5	3.5	35.548	314	314	0.00046019	1.9312	By MS/MS	By MS/MS		By MS/MS	By MS/MS	By MS/MS	3.5	3.5	0	3.5	3.5	3.5
H7C0S8;O75575	H7C0S8;O75575	1;1	1;1	1;1	DNA-directed RNA polymerase III subunit RPC9	CRCP	tr|H7C0S8|H7C0S8_HUMAN RPOL4c domain-containing protein (Fragment) OS=Homo sapiens OX=9606 PE=3 SV=2;sp|O75575|RPC9_HUMAN DNA-directed RNA polymerase III subunit RPC9 OS=Homo sapiens OX=9606 GN=CRCP PE=1 SV=1	2	1	1	1	0	0	0	0	0	0	0	0	0	0	0	0	0	0	0	0	0	0	7.5	7.5	7.5	34.546	307	307;148	0	28.06							0	0	0	0	0	0
Q02930	Q02930	1	1	1	Cyclic AMP-responsive element-binding protein 5	CREB5	sp|Q02930|CREB5_HUMAN Cyclic AMP-responsive element-binding protein 5 OS=Homo sapiens OX=9606 GN=CREB5 PE=1 SV=3	1	1	1	1	0	0	1	0	0	1	0	0	1	0	0	1	0	0	1	0	0	1	3.5	3.5	3.5	56.918	508	508	0.00090375	1.819			By MS/MS			By matching	0	0	3.5	0	0	3.5
Q92793	Q92793	1	1	1	CREB-binding protein	CREBBP	sp|Q92793|CBP_HUMAN CREB-binding protein OS=Homo sapiens OX=9606 GN=CREBBP PE=1 SV=3	1	1	1	1	1	0	0	0	0	0	1	0	0	0	0	0	1	0	0	0	0	0	1	1	1	265.35	2442	2442	1	-2	By MS/MS						1	0	0	0	0	0
I3L297;P46108	I3L297;P46108	3;3	3;3	3;3	Adapter molecule crk	CRK	tr|I3L297|I3L297_HUMAN Adapter molecule crk OS=Homo sapiens OX=9606 GN=CRK PE=1 SV=1;sp|P46108|CRK_HUMAN Adapter molecule crk OS=Homo sapiens OX=9606 GN=CRK PE=1 SV=2	2	3	3	3	0	0	1	0	1	2	0	0	1	0	1	2	0	0	1	0	1	2	20.6	20.6	20.6	25.503	223	223;304	0	3.5689			By MS/MS		By MS/MS	By MS/MS	0	0	6.7	0	6.3	14.3
Q8IUI8	Q8IUI8	3	3	3	Cytokine receptor-like factor 3	CRLF3	sp|Q8IUI8|CRLF3_HUMAN Cytokine receptor-like factor 3 OS=Homo sapiens OX=9606 GN=CRLF3 PE=1 SV=2	1	3	3	3	0	0	0	0	0	0	0	0	0	0	0	0	0	0	0	0	0	0	13.8	13.8	13.8	49.765	442	442	0	15.635							0	0	0	0	0	0
C9JP16;O75718	C9JP16;O75718	2;2	2;2	2;2	Cartilage-associated protein	CRTAP	tr|C9JP16|C9JP16_HUMAN Cartilage-associated protein OS=Homo sapiens OX=9606 GN=CRTAP PE=1 SV=1;sp|O75718|CRTAP_HUMAN Cartilage-associated protein OS=Homo sapiens OX=9606 GN=CRTAP PE=1 SV=1	2	2	2	2	1	0	1	1	1	1	1	0	1	1	1	1	1	0	1	1	1	1	7.8	7.8	7.8	41.432	358	358;401	0.0029611	1.3893	By MS/MS		By MS/MS	By MS/MS	By MS/MS	By MS/MS	5.9	0	5.9	5.9	5.9	5.9
Q6UUV9;M0QXN6;M0QX46	Q6UUV9;M0QXN6;M0QX46	2;1;1	2;1;1	2;1;1	CREB-regulated transcription coactivator 1	CRTC1	sp|Q6UUV9|CRTC1_HUMAN CREB-regulated transcription coactivator 1 OS=Homo sapiens OX=9606 GN=CRTC1 PE=1 SV=2;tr|M0QXN6|M0QXN6_HUMAN CREB-regulated transcription coactivator 1 OS=Homo sapiens OX=9606 GN=CRTC1 PE=1 SV=1;tr|M0QX46|M0QX46_HUMAN CREB-regulated t	3	2	2	2	0	0	2	0	0	2	0	0	2	0	0	2	0	0	2	0	0	2	6.5	6.5	6.5	67.299	634	634;392;593	0	7.8554			By MS/MS			By MS/MS	0	0	6.5	0	0	6.5
A6NMA8;O95825	A6NMA8;O95825	1;1	1;1	1;1	Quinone oxidoreductase-like protein 1	CRYZL1	tr|A6NMA8|A6NMA8_HUMAN Quinone oxidoreductase-like protein 1 OS=Homo sapiens OX=9606 GN=CRYZL1 PE=1 SV=1;sp|O95825|QORL1_HUMAN Quinone oxidoreductase-like protein 1 OS=Homo sapiens OX=9606 GN=CRYZL1 PE=1 SV=2	2	1	1	1	0	0	1	0	0	1	0	0	1	0	0	1	0	0	1	0	0	1	6	6	6	37.061	334	334;349	0	5.1937			By MS/MS			By MS/MS	0	0	6	0	0	6
P55060	P55060	2	2	2	Exportin-2	CSE1L	sp|P55060|XPO2_HUMAN Exportin-2 OS=Homo sapiens OX=9606 GN=CSE1L PE=1 SV=3	1	2	2	2	0	0	0	1	2	1	0	0	0	1	2	1	0	0	0	1	2	1	3.5	3.5	3.5	110.42	971	971	0	4.8589				By matching	By MS/MS	By matching	0	0	0	1.8	3.5	1.8
P41240;H3BUM9;H3BN15;H3BU69;K7ENL8;K7ES68;K7EQY5;P42679	P41240	58;18;5;5;1;1;1;1	58;18;5;5;1;1;1;1	58;18;5;5;1;1;1;1	Tyrosine-protein kinase CSK	CSK	sp|P41240|CSK_HUMAN Tyrosine-protein kinase CSK OS=Homo sapiens OX=9606 GN=CSK PE=1 SV=1	8	58	58	58	18	25	35	33	39	49	18	25	35	33	39	49	18	25	35	33	39	49	83.3	83.3	83.3	50.704	450	450;110;64;68;174;267;506;507	0	323.31	By MS/MS	By MS/MS	By MS/MS	By MS/MS	By MS/MS	By MS/MS	36.7	48.2	74.7	54.2	60	81.1
P48730;H7BYT1;J3KRM8	P48730;H7BYT1	4;4;1	2;2;1	2;2;1	Casein kinase I isoform delta	CSNK1D	sp|P48730|KC1D_HUMAN Casein kinase I isoform delta OS=Homo sapiens OX=9606 GN=CSNK1D PE=1 SV=2;tr|H7BYT1|H7BYT1_HUMAN Casein kinase I isoform delta OS=Homo sapiens OX=9606 GN=CSNK1D PE=1 SV=2	3	4	2	2	0	0	2	0	0	3	0	0	2	0	0	2	0	0	2	0	0	2	10.1	6.7	6.7	47.33	415	415;427;64	0	2.8375			By MS/MS			By MS/MS	0	0	6.7	0	0	10.1
P19784;H3BNI9;H3BSA1	P19784;H3BNI9;H3BSA1	9;9;6	9;9;6	9;9;6	Casein kinase II subunit alpha	CSNK2A2	sp|P19784|CSK22_HUMAN Casein kinase II subunit alpha OS=Homo sapiens OX=9606 GN=CSNK2A2 PE=1 SV=1;tr|H3BNI9|H3BNI9_HUMAN Casein kinase II subunit alpha OS=Homo sapiens OX=9606 GN=CSNK2A2 PE=1 SV=2;tr|H3BSA1|H3BSA1_HUMAN Casein kinase II subunit alpha (F	3	9	9	9	1	1	3	0	1	5	1	1	3	0	1	5	1	1	3	0	1	5	29.1	29.1	29.1	41.213	350	350;299;230	0	39.121	By matching	By MS/MS	By MS/MS		By MS/MS	By MS/MS	5.4	5.4	14.3	0	5.4	16
A0A7I2YQ78;Q5SRQ6;P67870;Q5SRQ3;N0E472;A0A0G2JM12;A0A7I2V500;N0E644;A0A0G2JM58;A0A7I2YQQ2	A0A7I2YQ78;Q5SRQ6;P67870;Q5SRQ3;N0E472;A0A0G2JM12	4;4;4;3;3;3;1;1;1;1	4;4;4;3;3;3;1;1;1;1	4;4;4;3;3;3;1;1;1;1	Casein kinase II subunit beta	CSNK2B;CSNK2B-LY6G5B-1181;CSNK2B-LY6G5B--991	tr|A0A7I2YQ78|A0A7I2YQ78_HUMAN Casein kinase II subunit beta OS=Homo sapiens OX=9606 GN=CSNK2B PE=1 SV=1;tr|Q5SRQ6|Q5SRQ6_HUMAN Casein kinase II subunit beta OS=Homo sapiens OX=9606 GN=CSNK2B PE=1 SV=2;sp|P67870|CSK2B_HUMAN Casein kinase II subunit beta OS	10	4	4	4	0	0	0	2	0	2	0	0	0	2	0	2	0	0	0	2	0	2	25.1	25.1	25.1	26.668	231	231;234;215;228;304;304;98;161;161;164	0	36.554				By MS/MS		By MS/MS	0	0	0	17.7	0	8.2
A0A7I2V5G7;A0A7I2V3F0;A0A7I2V5W3;A0A7I2V3M9;A0A6Q8PF61;A0A6Q8PF96;A0A6Q8PGS3;A0A7I2V4L2;A0A6Q8PHN8;A0A7I2V3Z9;A0A7I2V398;A0A7I2YQH9;E5RGA5;A0A7I2V4M7;A0A7I2V5N5;A0A7I2V372;A0A7I2PHE7;A0A7I2V3V5;A0A7I2V5L8;A0A7I2V5J9;A0A7I2V5P5;A0A7I2V4R5;A0A7I2V4U4;A0A7I2YQE8;A0A7I2V519;A0A6Q8PGI0;A0A7I2V425;A0A7I2V3F6;A0A7I2V5J7;F2Z2M5;E5RI67;A0A7I2V4I1;A0A7I2V5F2;A0A7I2V2X5;A0A7I2V5U6;A0A7I2V2I3;A0A7I2V5A7;Q1MS…	A0A7I2V5G7;A0A7I2V3F0;A0A7I2V5W3;A0A7I2V3M9;A0A6Q8PF61;A0A6Q8PF96;A0A6Q8PGS3;A0A7I2V4L2;A0A6Q8PHN8;A0A7I2V3Z9;A0A7I2V398;A0A7I2YQH9;E5RGA5;A0A7I2V4M7;A0A7I2V5N5;A0A7I2V372;A0A7I2PHE7;A0A7I2V3V5;A0A7I2V5L8;A0A7I2V5J9;A0A7I2V5P5;A0A7I2V4R5;A0A7I2V4U4;A0A7I2YQE8;A0A7I2V519;A0A6Q8PGI0;A0A7I2V425;A0A7I2V3F6;A0A7I2V5J7;F2Z2M5;E5RI67;A0A7I2V4I1;A0A7I2V5F2;A0A7I2V2X5;A0A7I2V5U6;A0A7I2V2I3;A0A7I2V5A7;Q1MS…	2;2;2;2;2;2;2;2;2;1;1;1;1;1;1;1;1;1;1;1;1;1;1;1;1;1;1;1;1;1;1;1;1;1;1;1;1;1	2;2;2;2;2;2;2;2;2;1;1;1;1;1;1;1;1;1;1;1;1;1;1;1;1;1;1;1;1;1;1;1;1;1;1;1;1;1	2;2;2;2;2;2;2;2;2;1;1;1;1;1;1;1;1;1;1;1;1;1;1;1;1;1;1;1;1;1;1;1;1;1;1;1;1;1	Centrosome and spindle pole-associated protein 1	CSPP1	tr|A0A7I2V5G7|A0A7I2V5G7_HUMAN Centrosome and spindle pole-associated protein 1 OS=Homo sapiens OX=9606 GN=CSPP1 PE=1 SV=1;tr|A0A7I2V3F0|A0A7I2V3F0_HUMAN Centrosome and spindle pole-associated protein 1 OS=Homo sapiens OX=9606 GN=CSPP1 PE=1 SV=1;tr|A0A7I2V	38	2	2	2	1	0	1	1	0	1	1	0	1	1	0	1	1	0	1	1	0	1	2.6	2.6	2.6	117.92	1008	1008;1035;1226;1097;1212;1199;1134;1185;1161;1137;1059;1071;66;387;1215;1219;1248;1262;1188;993;843;1262;92;104;177;290;321;336;369;404;79;436;437;440;455;669;773;1256	0.00046361	2.0067	By MS/MS		By MS/MS	By MS/MS		By MS/MS	1.4	0	1.4	1.4	0	1.4
P01040;C9J0E4	P01040;C9J0E4	2;1	2;1	2;1	Cystatin-A;Cystatin-A, N-terminally processed	CSTA	sp|P01040|CYTA_HUMAN Cystatin-A OS=Homo sapiens OX=9606 GN=CSTA PE=1 SV=1;tr|C9J0E4|C9J0E4_HUMAN Cystatin-A OS=Homo sapiens OX=9606 GN=CSTA PE=1 SV=1	2	2	2	2	1	0	1	0	1	1	1	0	1	0	1	1	1	0	1	0	1	1	39.8	39.8	39.8	11.006	98	98;63	0	2.6372	By MS/MS		By MS/MS		By MS/MS	By MS/MS	27.6	0	12.2	0	27.6	12.2
E9PLP8;Q12996	E9PLP8;Q12996	1;1	1;1	1;1	Cleavage stimulation factor subunit 3	CSTF3	tr|E9PLP8|E9PLP8_HUMAN Cleavage stimulation factor subunit 3 OS=Homo sapiens OX=9606 GN=CSTF3 PE=1 SV=2;sp|Q12996|CSTF3_HUMAN Cleavage stimulation factor subunit 3 OS=Homo sapiens OX=9606 GN=CSTF3 PE=1 SV=1	2	1	1	1	0	0	0	0	0	0	0	0	0	0	0	0	0	0	0	0	0	0	1.6	1.6	1.6	86.272	749	749;717	0.0067114	1.0953							0	0	0	0	0	0
Q13363;H0Y8W7;H0Y9M9;H0Y8U5;D6RAX2;E9PGB1;E7ESU7;E7EPF8	Q13363;H0Y8W7;H0Y9M9	5;4;3;2;2;1;1;1	5;4;3;2;2;1;1;1	3;2;1;0;2;1;1;1	C-terminal-binding protein 1	CTBP1	sp|Q13363|CTBP1_HUMAN C-terminal-binding protein 1 OS=Homo sapiens OX=9606 GN=CTBP1 PE=1 SV=2;tr|H0Y8W7|H0Y8W7_HUMAN C-terminal-binding protein 1 (Fragment) OS=Homo sapiens OX=9606 GN=CTBP1 PE=1 SV=1;tr|H0Y9M9|H0Y9M9_HUMAN C-terminal-binding protein 1 (Fra	8	5	5	3	0	1	3	1	1	3	0	1	3	1	1	3	0	0	2	0	0	2	11.6	11.6	7.7	47.535	440	440;287;145;184;186;145;171;202	0	8.9358		By MS/MS	By MS/MS	By MS/MS	By MS/MS	By MS/MS	0	3.9	9.3	3.9	3.9	9.3
P56545	P56545	3	1	1	C-terminal-binding protein 2	CTBP2	sp|P56545|CTBP2_HUMAN C-terminal-binding protein 2 OS=Homo sapiens OX=9606 GN=CTBP2 PE=1 SV=1	1	3	1	1	0	1	2	1	1	2	0	0	1	0	0	1	0	0	1	0	0	1	6.7	2.9	2.9	48.944	445	445	0.0084681	1.0075		By matching	By MS/MS	By matching	By matching	By MS/MS	0	3.8	6.7	3.8	3.8	6.7
A0A2R8Y6Z6;A0A2R8Y6C1;A0A2R8Y595;A0A2R8YFL0;P49711	A0A2R8Y6Z6;A0A2R8Y6C1;A0A2R8Y595;A0A2R8YFL0;P49711	1;1;1;1;1	1;1;1;1;1	1;1;1;1;1	Transcriptional repressor CTCF	CTCF	tr|A0A2R8Y6Z6|A0A2R8Y6Z6_HUMAN Transcriptional repressor CTCF (Fragment) OS=Homo sapiens OX=9606 GN=CTCF PE=1 SV=1;tr|A0A2R8Y6C1|A0A2R8Y6C1_HUMAN Transcriptional repressor CTCF (Fragment) OS=Homo sapiens OX=9606 GN=CTCF PE=1 SV=1;tr|A0A2R8Y595|A0A2R8Y595_H	5	1	1	1	0	1	0	1	0	0	0	1	0	1	0	0	0	1	0	1	0	0	16.3	16.3	16.3	14.896	135	135;163;638;725;727	0	8.096		By matching		By MS/MS			0	16.3	0	16.3	0	0
P26232;C9J144;C9IZ88	P26232	3;1;1	1;1;1	1;1;1	Catenin alpha-2	CTNNA2	sp|P26232|CTNA2_HUMAN Catenin alpha-2 OS=Homo sapiens OX=9606 GN=CTNNA2 PE=1 SV=5	3	3	1	1	1	1	1	1	1	1	0	0	0	0	0	0	0	0	0	0	0	0	5	1.9	1.9	105.31	953	953;66;117	0	6.2783	By matching	By matching	By matching	By matching	By matching	By matching	1.8	1.8	1.8	1.8	1.8	1.8
Q9UBT7	Q9UBT7	1	1	1	Alpha-catulin	CTNNAL1	sp|Q9UBT7|CTNL1_HUMAN Alpha-catulin OS=Homo sapiens OX=9606 GN=CTNNAL1 PE=1 SV=2	1	1	1	1	1	1	0	1	1	0	1	1	0	1	1	0	1	1	0	1	1	0	2	2	2	81.895	734	734	1	-2	By MS/MS	By MS/MS		By MS/MS	By matching		2	2	0	2	2	0
Q9NRF8	Q9NRF8	2	1	1	CTP synthase 2	CTPS2	sp|Q9NRF8|PYRG2_HUMAN CTP synthase 2 OS=Homo sapiens OX=9606 GN=CTPS2 PE=1 SV=1	1	2	1	1	0	0	1	0	0	1	0	0	1	0	0	1	0	0	1	0	0	1	4.9	2.6	2.6	65.677	586	586	0.00046816	2.072			By MS/MS			By matching	0	0	2.6	0	0	2.6
Q9H467	Q9H467	2	2	2	CUE domain-containing protein 2	CUEDC2	sp|Q9H467|CUED2_HUMAN CUE domain-containing protein 2 OS=Homo sapiens OX=9606 GN=CUEDC2 PE=1 SV=1	1	2	2	2	1	0	0	0	1	1	1	0	0	0	1	1	1	0	0	0	1	1	7.7	7.7	7.7	32.009	287	287	0.0084746	1.0092	By MS/MS				By MS/MS	By matching	4.5	0	0	0	4.5	4.5
A0A0A0MTN0;Q13617;Q5T2B5;Q5T2B7	A0A0A0MTN0;Q13617;Q5T2B5	7;7;6;3	7;7;6;3	7;7;6;3	Cullin-2	CUL2	tr|A0A0A0MTN0|A0A0A0MTN0_HUMAN Cullin-2 OS=Homo sapiens OX=9606 GN=CUL2 PE=1 SV=1;sp|Q13617|CUL2_HUMAN Cullin-2 OS=Homo sapiens OX=9606 GN=CUL2 PE=1 SV=2;tr|Q5T2B5|Q5T2B5_HUMAN Cullin-2 OS=Homo sapiens OX=9606 GN=CUL2 PE=1 SV=1	4	7	7	7	0	0	4	0	0	4	0	0	4	0	0	4	0	0	4	0	0	4	10.6	10.6	10.6	88.505	758	758;745;706;90	0	11.455			By MS/MS			By MS/MS	0	0	6.7	0	0	7
A0A7P0T9R8;A0A7P0TAF9;A0A7P0T9P5;A0A669KBG9;A0A7P0T9D0;A0A0A0MR50;A0A7P0T8P8;A0A7P0T9C8;A0A7P0T9L3;A0A669KAX4;K4DI93;A0A7P0T954;Q13619;Q13620	A0A7P0T9R8;A0A7P0TAF9;A0A7P0T9P5;A0A669KBG9;A0A7P0T9D0;A0A0A0MR50;A0A7P0T8P8;A0A7P0T9C8;A0A7P0T9L3;A0A669KAX4;K4DI93;A0A7P0T954;Q13619;Q13620	1;1;1;1;1;1;1;1;1;1;1;1;1;1	1;1;1;1;1;1;1;1;1;1;1;1;1;1	1;1;1;1;1;1;1;1;1;1;1;1;1;1	Cullin-4A;Cullin-4B	CUL4A;CUL4B	tr|A0A7P0T9R8|A0A7P0T9R8_HUMAN Cullin-4B OS=Homo sapiens OX=9606 GN=CUL4B PE=4 SV=1;tr|A0A7P0TAF9|A0A7P0TAF9_HUMAN Cullin-4B (Fragment) OS=Homo sapiens OX=9606 GN=CUL4B PE=4 SV=1;tr|A0A7P0T9P5|A0A7P0T9P5_HUMAN Cullin-4B (Fragment) OS=Homo sapiens OX=9606 G	14	1	1	1	0	0	0	0	0	1	0	0	0	0	0	1	0	0	0	0	0	1	2.7	2.7	2.7	44.85	401	401;446;482;571;656;667;675;686;780;897;900;933;759;913	0.0029523	1.3789						By matching	0	0	0	0	0	2.7
A0A2R8Y852;P39880;A0A2R8YDI1;Q13948	A0A2R8Y852;P39880;A0A2R8YDI1;Q13948	4;4;3;2	4;4;3;2	4;4;3;2	Homeobox protein cut-like 1;Protein CASP	CUX1	tr|A0A2R8Y852|A0A2R8Y852_HUMAN Homeobox protein cut-like OS=Homo sapiens OX=9606 GN=CUX1 PE=1 SV=1;sp|P39880|CUX1_HUMAN Homeobox protein cut-like 1 OS=Homo sapiens OX=9606 GN=CUX1 PE=1 SV=3;tr|A0A2R8YDI1|A0A2R8YDI1_HUMAN Homeobox protein cut-like OS=Homo s	4	4	4	4	0	0	4	0	0	4	0	0	4	0	0	4	0	0	4	0	0	4	4.5	4.5	4.5	159.39	1460	1460;1505;1358;678	0	13.814			By MS/MS			By MS/MS	0	0	4.5	0	0	4.5
Q9H5V9	Q9H5V9	5	5	5	UPF0428 protein CXorf56	CXorf56	sp|Q9H5V9|STEEP_HUMAN STING ER exit protein OS=Homo sapiens OX=9606 GN=STEEP1 PE=1 SV=1	1	5	5	5	1	0	1	0	2	3	1	0	1	0	2	3	1	0	1	0	2	3	23.9	23.9	23.9	25.624	222	222	0	3.6071	By MS/MS		By MS/MS		By MS/MS	By MS/MS	3.6	0	5.4	0	8.6	15.3
D6RFH4;H3BUX2;O43169	D6RFH4;H3BUX2;O43169	1;1;1	1;1;1	1;1;1	Cytochrome b5 type B	CYB5B	tr|D6RFH4|D6RFH4_HUMAN Cytochrome b5 type B OS=Homo sapiens OX=9606 GN=CYB5B PE=1 SV=2;tr|H3BUX2|H3BUX2_HUMAN Cytochrome b5 type B OS=Homo sapiens OX=9606 GN=CYB5B PE=1 SV=2;sp|O43169|CYB5B_HUMAN Cytochrome b5 type B OS=Homo sapiens OX=9606 GN=CYB5B PE=1 S	3	1	1	1	0	0	0	0	0	0	0	0	0	0	0	0	0	0	0	0	0	0	25.2	25.2	25.2	15.208	135	135;144;150	0.0013233	1.6353							0	0	0	0	0	0
P08574	P08574	3	3	3	Cytochrome c1, heme protein, mitochondrial	CYC1	sp|P08574|CY1_HUMAN Cytochrome c1, heme protein, mitochondrial OS=Homo sapiens OX=9606 GN=CYC1 PE=1 SV=3	1	3	3	3	0	0	2	0	1	2	0	0	2	0	1	2	0	0	2	0	1	2	16.3	16.3	16.3	35.422	325	325	0	15.655			By MS/MS		By matching	By MS/MS	0	0	8.9	0	4	8.9
C9JFR7;P62894;CON__P62894;P99999	C9JFR7;P62894;CON__P62894;P99999	2;2;2;2	2;2;2;2	2;2;2;2	Cytochrome c	CYCS	tr|C9JFR7|C9JFR7_HUMAN Cytochrome c (Fragment) OS=Homo sapiens OX=9606 GN=CYCS PE=1 SV=1;P62894 SWISS-PROT:P62894 Cytochrome c - Bos taurus (Bovine).;;sp|P99999|CYC_HUMAN Cytochrome c OS=Homo sapiens OX=9606 GN=CYCS PE=1 SV=2	4	2	2	2	1	0	1	0	2	1	1	0	1	0	2	1	1	0	1	0	2	1	11.9	11.9	11.9	11.333	101	101;105;105;105	0	2.771	By MS/MS		By MS/MS		By MS/MS	By MS/MS	10.9	0	10.9	0	11.9	10.9
Q7L576;A0A0G2JQH3;A0A087WVZ5;A0A0G2JR96;A0A0G2JQT1	Q7L576	3;1;1;1;1	3;1;1;1;1	1;1;1;1;1	Cytoplasmic FMR1-interacting protein 1	CYFIP1	sp|Q7L576|CYFP1_HUMAN Cytoplasmic FMR1-interacting protein 1 OS=Homo sapiens OX=9606 GN=CYFIP1 PE=1 SV=1	5	3	3	1	0	0	3	0	0	3	0	0	3	0	0	3	0	0	1	0	0	1	2.7	2.7	0.9	145.18	1253	1253;185;185;862;862	0	4.028			By MS/MS			By MS/MS	0	0	2.7	0	0	2.7
A0A0G2JJF2;P08686	A0A0G2JJF2;P08686	1;1	1;1	1;1	Steroid 21-hydroxylase	CYP21A2	tr|A0A0G2JJF2|A0A0G2JJF2_HUMAN Steroid 21-hydroxylase OS=Homo sapiens OX=9606 GN=CYP21A2 PE=1 SV=1;sp|P08686|CP21A_HUMAN Steroid 21-hydroxylase OS=Homo sapiens OX=9606 GN=CYP21A2 PE=1 SV=1	2	1	1	1	1	1	0	1	1	0	1	1	0	1	1	0	1	1	0	1	1	0	3.2	3.2	3.2	52.456	464	464;494	1	-2	By MS/MS	By MS/MS		By MS/MS	By MS/MS		3.2	3.2	0	3.2	3.2	0
P53355	P53355	1	1	1	Death-associated protein kinase 1	DAPK1	sp|P53355|DAPK1_HUMAN Death-associated protein kinase 1 OS=Homo sapiens OX=9606 GN=DAPK1 PE=1 SV=6	1	1	1	1	0	0	0	0	1	0	0	0	0	0	1	0	0	0	0	0	1	0	1	1	1	160.04	1430	1430	1	-2					By MS/MS		0	0	0	0	1	0
F8VUW5;Q15038	F8VUW5;Q15038	1;1	1;1	1;1	DAZ-associated protein 2	DAZAP2	tr|F8VUW5|F8VUW5_HUMAN DAZ-associated protein 2 OS=Homo sapiens OX=9606 GN=DAZAP2 PE=1 SV=1;sp|Q15038|DAZP2_HUMAN DAZ-associated protein 2 OS=Homo sapiens OX=9606 GN=DAZAP2 PE=1 SV=1	2	1	1	1	1	0	0	0	1	0	1	0	0	0	1	0	1	0	0	0	1	0	14.8	14.8	14.8	10.802	108	108;168	0.005988	1.1445	By MS/MS				By MS/MS		14.8	0	0	0	14.8	0
D6R9Q9	D6R9Q9	2	1	1		DBN1	tr|D6R9Q9|D6R9Q9_HUMAN Drebrin OS=Homo sapiens OX=9606 GN=DBN1 PE=1 SV=1	1	2	1	1	0	0	2	0	0	2	0	0	1	0	0	1	0	0	1	0	0	1	9	4.3	4.3	41.447	391	391	0.0098859	0.96103			By MS/MS			By MS/MS	0	0	9	0	0	9
H0Y7N7;Q9BQY9	H0Y7N7;Q9BQY9	1;1	1;1	1;1	Dysbindin domain-containing protein 2	DBNDD2	tr|H0Y7N7|H0Y7N7_HUMAN Dysbindin domain-containing protein 2 (Fragment) OS=Homo sapiens OX=9606 GN=DBNDD2 PE=1 SV=1;sp|Q9BQY9|DBND2_HUMAN Dysbindin domain-containing protein 2 OS=Homo sapiens OX=9606 GN=DBNDD2 PE=1 SV=3	2	1	1	1	1	1	0	0	1	0	1	1	0	0	1	0	1	1	0	0	1	0	5.2	5.2	5.2	18.923	172	172;259	0.00088731	1.6747	By MS/MS	By MS/MS			By MS/MS		5.2	5.2	0	0	5.2	0
A0A7P0T9W1;A0A7P0Z494;P11182;Q5VVL7	A0A7P0T9W1;A0A7P0Z494;P11182;Q5VVL7	3;3;3;2	3;3;3;2	3;3;3;2	Lipoamide acyltransferase component of branched-chain alpha-keto acid dehydrogenase complex, mitochondrial	DBT	tr|A0A7P0T9W1|A0A7P0T9W1_HUMAN Lipoamide acyltransferase component of branched-chain alpha-keto acid dehydrogenase complex, mitochondrial OS=Homo sapiens OX=9606 GN=DBT PE=4 SV=1;tr|A0A7P0Z494|A0A7P0Z494_HUMAN Lipoamide acyltransferase component of branche	4	3	3	3	0	0	1	0	0	2	0	0	1	0	0	2	0	0	1	0	0	2	11.6	11.6	11.6	32.976	301	301;524;482;320	0	3.5518			By MS/MS			By MS/MS	0	0	4	0	0	8.6
Q5QP82;A0A0A0MQT4	Q5QP82;A0A0A0MQT4	4;2	4;2	4;2	DDB1- and CUL4-associated factor 10	DCAF10	sp|Q5QP82|DCA10_HUMAN DDB1- and CUL4-associated factor 10 OS=Homo sapiens OX=9606 GN=DCAF10 PE=1 SV=1;tr|A0A0A0MQT4|A0A0A0MQT4_HUMAN DDB1- and CUL4-associated factor 10 OS=Homo sapiens OX=9606 GN=DCAF10 PE=1 SV=1	2	4	4	4	0	0	2	0	0	2	0	0	2	0	0	2	0	0	2	0	0	2	7.9	7.9	7.9	60.581	559	559;386	0	3.6432			By MS/MS			By MS/MS	0	0	3.4	0	0	3.4
Q5TAQ9;V9GY54	Q5TAQ9;V9GY54	2;1	2;1	2;1	DDB1- and CUL4-associated factor 8	DCAF8	sp|Q5TAQ9|DCAF8_HUMAN DDB1- and CUL4-associated factor 8 OS=Homo sapiens OX=9606 GN=DCAF8 PE=1 SV=1;tr|V9GY54|V9GY54_HUMAN DDB1- and CUL4-associated factor 8 OS=Homo sapiens OX=9606 GN=DCAF8 PE=1 SV=1	2	2	2	2	0	0	1	0	0	1	0	0	1	0	0	1	0	0	1	0	0	1	5.5	5.5	5.5	66.851	597	597;417	0.00045641	1.8829			By matching			By MS/MS	0	0	3.5	0	0	3.5
H0Y2Q8;H7C298;B6ZDN3;M0R2J8	H0Y2Q8;H7C298;B6ZDN3;M0R2J8	1;1;1;1	1;1;1;1	1;1;1;1		DCDC1	tr|H0Y2Q8|H0Y2Q8_HUMAN Doublecortin domain-containing protein 1 (Fragment) OS=Homo sapiens OX=9606 GN=DCDC1 PE=1 SV=1;tr|H7C298|H7C298_HUMAN Doublecortin domain-containing protein 1 (Fragment) OS=Homo sapiens OX=9606 GN=DCDC1 PE=1 SV=1;tr|B6ZDN3|B6ZDN3_HUM	4	1	1	1	0	0	1	0	0	1	0	0	1	0	0	1	0	0	1	0	0	1	2.9	2.9	2.9	45.841	407	407;818;890;1783	0.0045398	1.2749			By MS/MS			By MS/MS	0	0	2.9	0	0	2.9
Q96JQ0	Q96JQ0	1	1	1	Protocadherin-16	DCHS1	sp|Q96JQ0|PCD16_HUMAN Protocadherin-16 OS=Homo sapiens OX=9606 GN=DCHS1 PE=1 SV=1	1	1	1	1	1	1	0	1	1	0	1	1	0	1	1	0	1	1	0	1	1	0	0.7	0.7	0.7	346.18	3298	3298	0.00047985	2.2545	By MS/MS	By MS/MS		By MS/MS	By MS/MS		0.7	0.7	0	0.7	0.7	0
Q8IZD4;F5H4R4;B4DVJ6;F5GZK9	Q8IZD4;F5H4R4;B4DVJ6	3;2;2;1	3;2;2;1	3;2;2;1	mRNA-decapping enzyme 1B	DCP1B	sp|Q8IZD4|DCP1B_HUMAN mRNA-decapping enzyme 1B OS=Homo sapiens OX=9606 GN=DCP1B PE=1 SV=2;tr|F5H4R4|F5H4R4_HUMAN mRNA-decapping enzyme 1B OS=Homo sapiens OX=9606 GN=DCP1B PE=1 SV=1;tr|B4DVJ6|B4DVJ6_HUMAN cDNA FLJ57612, highly similar to mRNA decapping enzy	4	3	3	3	0	0	2	0	0	2	0	0	2	0	0	2	0	0	2	0	0	2	7.9	7.9	7.9	67.722	617	617;119;153;390	0	3.9833			By MS/MS			By MS/MS	0	0	5.7	0	0	5.7
X6RA56;X6RCK5;A0A0A0MRV8;X6RLR1;O75935	X6RA56;X6RCK5;A0A0A0MRV8;X6RLR1;O75935	1;1;1;1;1	1;1;1;1;1	1;1;1;1;1	Dynactin subunit 3	DCTN3	tr|X6RA56|X6RA56_HUMAN Dynactin subunit 3 OS=Homo sapiens OX=9606 GN=DCTN3 PE=1 SV=1;tr|X6RCK5|X6RCK5_HUMAN Dynactin subunit 3 (Fragment) OS=Homo sapiens OX=9606 GN=DCTN3 PE=1 SV=1;tr|A0A0A0MRV8|A0A0A0MRV8_HUMAN Dynactin subunit 3 (Fragment) OS=Homo sapien	5	1	1	1	0	0	0	0	0	0	0	0	0	0	0	0	0	0	0	0	0	0	13.4	13.4	13.4	16.091	142	142;151;160;176;186	0.00089526	1.7599							0	0	0	0	0	0
Q9UJW0;E5RGG1;H9KVE0	Q9UJW0	3;1;1	3;1;1	3;1;1	Dynactin subunit 4	DCTN4	sp|Q9UJW0|DCTN4_HUMAN Dynactin subunit 4 OS=Homo sapiens OX=9606 GN=DCTN4 PE=1 SV=1	3	3	3	3	0	0	1	0	0	1	0	0	1	0	0	1	0	0	1	0	0	1	8.7	8.7	8.7	52.337	460	460;114;134	0	2.8504			By matching			By MS/MS	0	0	3.7	0	0	3.7
J3KRZ4;J3KS22;Q7Z4W1	J3KRZ4;J3KS22;Q7Z4W1	1;1;1	1;1;1	1;1;1	L-xylulose reductase	DCXR	tr|J3KRZ4|J3KRZ4_HUMAN L-xylulose reductase (Fragment) OS=Homo sapiens OX=9606 GN=DCXR PE=1 SV=1;tr|J3KS22|J3KS22_HUMAN L-xylulose reductase (Fragment) OS=Homo sapiens OX=9606 GN=DCXR PE=1 SV=8;sp|Q7Z4W1|DCXR_HUMAN L-xylulose reductase OS=Homo sapiens OX=9	3	1	1	1	0	0	1	0	0	1	0	0	1	0	0	1	0	0	1	0	0	1	6.4	6.4	6.4	14.892	141	141;223;244	0.0077549	1.0405			By MS/MS			By MS/MS	0	0	6.4	0	0	6.4
Q9BW61	Q9BW61	2	2	2	DET1- and DDB1-associated protein 1	DDA1	sp|Q9BW61|DDA1_HUMAN DET1- and DDB1-associated protein 1 OS=Homo sapiens OX=9606 GN=DDA1 PE=1 SV=1	1	2	2	2	2	2	0	2	2	0	2	2	0	2	2	0	2	2	0	2	2	0	16.7	16.7	16.7	11.835	102	102	0	7.2461	By MS/MS	By MS/MS		By MS/MS	By MS/MS		16.7	16.7	0	16.7	16.7	0
O94830;E9PP45;E9PPH8;E9PIF5;E9PQY9;E9PM60;H0YF30;E9PKE6	O94830;E9PP45;E9PPH8;E9PIF5;E9PQY9;E9PM60;H0YF30;E9PKE6	2;1;1;1;1;1;1;1	2;1;1;1;1;1;1;1	2;1;1;1;1;1;1;1	Phospholipase DDHD2	DDHD2	sp|O94830|DDHD2_HUMAN Phospholipase DDHD2 OS=Homo sapiens OX=9606 GN=DDHD2 PE=1 SV=2;tr|E9PP45|E9PP45_HUMAN Phospholipase DDHD2 (Fragment) OS=Homo sapiens OX=9606 GN=DDHD2 PE=1 SV=1;tr|E9PPH8|E9PPH8_HUMAN Phospholipase DDHD2 (Fragment) OS=Homo sapiens OX=9	8	2	2	2	0	0	2	0	0	2	0	0	2	0	0	2	0	0	2	0	0	2	3.4	3.4	3.4	81.031	711	711;57;137;142;156;161;183;222	0	3.7103			By MS/MS			By MS/MS	0	0	3.4	0	0	3.4
Q5TDH0;H0YII4;H0YI90	Q5TDH0	3;1;1	3;1;1	3;1;1	Protein DDI1 homolog 2	DDI2	sp|Q5TDH0|DDI2_HUMAN Protein DDI1 homolog 2 OS=Homo sapiens OX=9606 GN=DDI2 PE=1 SV=1	3	3	3	3	0	1	3	2	2	1	0	1	3	2	2	1	0	1	3	2	2	1	11.3	11.3	11.3	44.522	399	399;99;103	0	7.8945		By matching	By MS/MS	By MS/MS	By MS/MS	By MS/MS	0	3.8	11.3	7.8	7.8	4
A0A0A0MRX2;Q96HY6	A0A0A0MRX2;Q96HY6	1;1	1;1	1;1	DDRGK domain-containing protein 1	DDRGK1	tr|A0A0A0MRX2|A0A0A0MRX2_HUMAN DDRGK domain-containing protein 1 OS=Homo sapiens OX=9606 GN=DDRGK1 PE=1 SV=1;sp|Q96HY6|DDRGK_HUMAN DDRGK domain-containing protein 1 OS=Homo sapiens OX=9606 GN=DDRGK1 PE=1 SV=2	2	1	1	1	0	0	0	0	0	1	0	0	0	0	0	1	0	0	0	0	0	1	4.7	4.7	4.7	33.939	298	298;314	0.00047125	2.1257						By MS/MS	0	0	0	0	0	4.7
J3KQ18;P30046;H7C342;B5MC82;A6NHG4	J3KQ18;P30046;H7C342;B5MC82;A6NHG4	2;2;1;1;1	2;2;1;1;1	2;2;1;1;1	D-dopachrome decarboxylase;D-dopachrome decarboxylase-like protein	DDT;DDTL	tr|J3KQ18|J3KQ18_HUMAN D-dopachrome decarboxylase OS=Homo sapiens OX=9606 GN=DDT PE=1 SV=1;sp|P30046|DOPD_HUMAN D-dopachrome decarboxylase OS=Homo sapiens OX=9606 GN=DDT PE=1 SV=3;tr|H7C342|H7C342_HUMAN D-dopachrome decarboxylase (Fragment) OS=Homo sapiens	5	2	2	2	0	0	1	0	0	0	0	0	1	0	0	0	0	0	1	0	0	0	19.7	19.7	19.7	14.192	132	132;118;50;166;134	0.0037406	1.3058			By MS/MS				0	0	8.3	0	0	0
Q9NR30	Q9NR30	3	2	2	Nucleolar RNA helicase 2	DDX21	sp|Q9NR30|DDX21_HUMAN Nucleolar RNA helicase 2 OS=Homo sapiens OX=9606 GN=DDX21 PE=1 SV=5	1	3	2	2	0	1	2	1	1	1	0	1	1	1	1	1	0	1	1	1	1	1	4.7	2.8	2.8	87.343	783	783	0.0037531	1.3129		By MS/MS	By MS/MS	By MS/MS	By MS/MS	By MS/MS	0	1.4	3.3	1.4	1.4	1.4
A0A1W2PRR2;F5GYL3;G3V529;Q9GZR7;A0A087WXU8	A0A1W2PRR2;F5GYL3;G3V529;Q9GZR7;A0A087WXU8	3;3;3;3;2	3;3;3;3;2	3;3;3;3;2	ATP-dependent RNA helicase DDX24	DDX24	tr|A0A1W2PRR2|A0A1W2PRR2_HUMAN ATP-dependent RNA helicase DDX24 OS=Homo sapiens OX=9606 GN=DDX24 PE=1 SV=1;tr|F5GYL3|F5GYL3_HUMAN ATP-dependent RNA helicase DDX24 OS=Homo sapiens OX=9606 GN=DDX24 PE=1 SV=1;tr|G3V529|G3V529_HUMAN RNA helicase OS=Homo sapien	5	3	3	3	0	1	0	2	0	0	0	1	0	2	0	0	0	1	0	2	0	0	9.9	9.9	9.9	65.695	577	577;609;816;859;485	0	3.214		By MS/MS		By matching			0	4.9	0	7.8	0	0
Q9NUL7	Q9NUL7	5	5	5	Probable ATP-dependent RNA helicase DDX28	DDX28	sp|Q9NUL7|DDX28_HUMAN Probable ATP-dependent RNA helicase DDX28 OS=Homo sapiens OX=9606 GN=DDX28 PE=1 SV=2	1	5	5	5	0	1	1	1	0	0	0	1	1	1	0	0	0	1	1	1	0	0	15	15	15	59.58	540	540	0	4.8367		By matching	By MS/MS	By matching			0	2.8	1.3	2.8	0	0
A0A0D9SEM9	A0A0D9SEM9	2	1	1		DDX39A	tr|A0A0D9SEM9|A0A0D9SEM9_HUMAN ATP-dependent RNA helicase DDX39A (Fragment) OS=Homo sapiens OX=9606 GN=DDX39A PE=1 SV=1	1	2	1	1	0	0	1	0	0	2	0	0	0	0	0	1	0	0	0	0	0	1	22.9	10.4	10.4	10.925	96	96	1	-2			By matching			By MS/MS	0	0	12.5	0	0	22.9
O15523	O15523	49	1	1	ATP-dependent RNA helicase DDX3Y	DDX3Y	sp|O15523|DDX3Y_HUMAN ATP-dependent RNA helicase DDX3Y OS=Homo sapiens OX=9606 GN=DDX3Y PE=1 SV=2	1	49	1	1	21	25	21	25	26	36	0	0	0	0	0	0	0	0	0	0	0	0	54.8	3.8	3.8	73.153	660	660	0	7.6707	By matching	By matching	By matching	By matching	By matching	By matching	33.6	32.1	29.7	32.1	35.6	47.7
Q9BQ39	Q9BQ39	3	3	2	ATP-dependent RNA helicase DDX50	DDX50	sp|Q9BQ39|DDX50_HUMAN ATP-dependent RNA helicase DDX50 OS=Homo sapiens OX=9606 GN=DDX50 PE=1 SV=1	1	3	3	2	0	0	2	0	0	0	0	0	2	0	0	0	0	0	1	0	0	0	6.5	6.5	4.5	82.564	737	737	0	4.6423			By MS/MS				0	0	3.5	0	0	0
G3V158;E9PPM8;Q9Y315	G3V158;E9PPM8;Q9Y315	1;1;1	1;1;1	1;1;1	Deoxyribose-phosphate aldolase	DERA	tr|G3V158|G3V158_HUMAN 2-deoxy-D-ribose 5-phosphate aldolase OS=Homo sapiens OX=9606 GN=DERA PE=1 SV=1;tr|E9PPM8|E9PPM8_HUMAN 2-deoxy-D-ribose 5-phosphate aldolase OS=Homo sapiens OX=9606 GN=DERA PE=1 SV=1;sp|Q9Y315|DEOC_HUMAN Deoxyribose-phosphate aldolas	3	1	1	1	0	0	1	0	0	0	0	0	1	0	0	0	0	0	1	0	0	0	5.2	5.2	5.2	25.113	230	230;275;318	0.0059737	1.136			By MS/MS				0	0	5.2	0	0	0
Q96DF8;F8WEF8	Q96DF8;F8WEF8	4;2	4;2	4;2	Protein DGCR14	DGCR14	sp|Q96DF8|ESS2_HUMAN Splicing factor ESS-2 homolog OS=Homo sapiens OX=9606 GN=ESS2 PE=1 SV=1;tr|F8WEF8|F8WEF8_HUMAN Splicing factor ESS-2 homolog OS=Homo sapiens OX=9606 GN=ESS2 PE=1 SV=1	2	4	4	4	0	0	3	0	0	4	0	0	3	0	0	4	0	0	3	0	0	4	10.5	10.5	10.5	52.567	476	476;293	0	29.874			By MS/MS			By MS/MS	0	0	10.5	0	0	10.5
Q8WYQ5	Q8WYQ5	4	4	4	Microprocessor complex subunit DGCR8	DGCR8	sp|Q8WYQ5|DGCR8_HUMAN Microprocessor complex subunit DGCR8 OS=Homo sapiens OX=9606 GN=DGCR8 PE=1 SV=1	1	4	4	4	0	0	3	0	1	2	0	0	3	0	1	2	0	0	3	0	1	2	7.4	7.4	7.4	86.044	773	773	0	3.8134			By MS/MS		By matching	By MS/MS	0	0	5.8	0	2.1	3.6
Q5SQH5;O60231;A0A140T9T4;A0A140T8Y5;A0A140T947	Q5SQH5;O60231;A0A140T9T4;A0A140T8Y5;A0A140T947	2;2;1;1;1	2;2;1;1;1	2;2;1;1;1	Putative pre-mRNA-splicing factor ATP-dependent RNA helicase DHX16	DHX16	tr|Q5SQH5|Q5SQH5_HUMAN RNA helicase OS=Homo sapiens OX=9606 GN=DHX16 PE=1 SV=1;sp|O60231|DHX16_HUMAN Pre-mRNA-splicing factor ATP-dependent RNA helicase DHX16 OS=Homo sapiens OX=9606 GN=DHX16 PE=1 SV=2;tr|A0A140T9T4|A0A140T9T4_HUMAN Pre-mRNA-splicing facto	5	2	2	2	0	0	1	0	0	0	0	0	1	0	0	0	0	0	1	0	0	0	4.1	4.1	4.1	63.513	560	560;1041;188;560;669	0	2.6195			By MS/MS				0	0	2.1	0	0	0
Q92620	Q92620	1	1	1	Pre-mRNA-splicing factor ATP-dependent RNA helicase PRP16	DHX38	sp|Q92620|PRP16_HUMAN Pre-mRNA-splicing factor ATP-dependent RNA helicase PRP16 OS=Homo sapiens OX=9606 GN=DHX38 PE=1 SV=2	1	1	1	1	0	0	0	0	0	1	0	0	0	0	0	1	0	0	0	0	0	1	1	1	1	140.5	1227	1227	0.0025597	1.4243						By matching	0	0	0	0	0	1
A6NML8;K4DI95;C9J6U3;O60879	A6NML8;K4DI95;C9J6U3;O60879	1;1;1;1	1;1;1;1	1;1;1;1	Protein diaphanous homolog 2	DIAPH2	tr|A6NML8|A6NML8_HUMAN Diaphanous homolog 2 (Drosophila), isoform CRA_c OS=Homo sapiens OX=9606 GN=DIAPH2 PE=1 SV=3;tr|K4DI95|K4DI95_HUMAN Diaphanous homolog 2 (Drosophila), isoform CRA_a OS=Homo sapiens OX=9606 GN=DIAPH2 PE=1 SV=1;tr|C9J6U3|C9J6U3_HUMAN P	4	1	1	1	0	0	0	1	1	0	0	0	0	1	1	0	0	0	0	1	1	0	1.4	1.4	1.4	124.85	1096	1096;1101;1103;1101	1	-2				By MS/MS	By MS/MS		0	0	0	1.4	1.4	0
Q9NSV4	Q9NSV4	1	1	1	Protein diaphanous homolog 3	DIAPH3	sp|Q9NSV4|DIAP3_HUMAN Protein diaphanous homolog 3 OS=Homo sapiens OX=9606 GN=DIAPH3 PE=1 SV=4	1	1	1	1	0	0	1	0	0	1	0	0	1	0	0	1	0	0	1	0	0	1	1.1	1.1	1.1	136.92	1193	1193	1	-2			By MS/MS			By matching	0	0	1.1	0	0	1.1
F2Z2C0;Q9Y2L1	F2Z2C0;Q9Y2L1	1;1	1;1	1;1	Exosome complex exonuclease RRP44	DIS3	tr|F2Z2C0|F2Z2C0_HUMAN Exosome complex exonuclease RRP44 OS=Homo sapiens OX=9606 GN=DIS3 PE=1 SV=1;sp|Q9Y2L1|RRP44_HUMAN Exosome complex exonuclease RRP44 OS=Homo sapiens OX=9606 GN=DIS3 PE=1 SV=2	2	1	1	1	0	0	1	0	0	1	0	0	1	0	0	1	0	0	1	0	0	1	2.3	2.3	2.3	63.616	559	559;958	0.0029511	1.3771			By MS/MS			By MS/MS	0	0	2.3	0	0	2.3
Q6AWB1;E7EX90;A0A7P0Z4C3;Q14203	Q6AWB1;E7EX90;A0A7P0Z4C3;Q14203	1;1;1;1	1;1;1;1	1;1;1;1	Dynactin subunit 1	DKFZp686E0752;DCTN1	tr|Q6AWB1|Q6AWB1_HUMAN Dynactin subunit 1 OS=Homo sapiens OX=9606 GN=DCTN1 PE=1 SV=1;tr|E7EX90|E7EX90_HUMAN Dynactin subunit 1 OS=Homo sapiens OX=9606 GN=DCTN1 PE=1 SV=1;tr|A0A7P0Z4C3|A0A7P0Z4C3_HUMAN Dynactin subunit 1 OS=Homo sapiens OX=9606 GN=DCTN1 PE=	4	1	1	1	0	0	0	0	0	0	0	0	0	0	0	0	0	0	0	0	0	0	1.9	1.9	1.9	98.517	890	890;1256;1261;1278	0	6.4378							0	0	0	0	0	0
C9JUA9;A0A590UJ29;A0A0C4DFT3;A0A590UKA8;A0A590UJC5;A0A590UJR5;A0A590UJ08;A0A590UJ81;A0A590UJ18;A0A590UJ68;A0A590UJS9;A0A590UJX2;A0A590UK48;A0A590UJR4;A0A590UK81;A0A590UJD9;Q12959	C9JUA9;A0A590UJ29;A0A0C4DFT3;A0A590UKA8;A0A590UJC5;A0A590UJR5;A0A590UJ08;A0A590UJ81;A0A590UJ18;A0A590UJ68;A0A590UJS9;A0A590UJX2;A0A590UK48;A0A590UJR4;A0A590UK81;A0A590UJD9;Q12959	1;1;1;1;1;1;1;1;1;1;1;1;1;1;1;1;1	1;1;1;1;1;1;1;1;1;1;1;1;1;1;1;1;1	1;1;1;1;1;1;1;1;1;1;1;1;1;1;1;1;1	Disks large homolog 1	DLG1	tr|C9JUA9|C9JUA9_HUMAN Disks large homolog 1 OS=Homo sapiens OX=9606 GN=DLG1 PE=1 SV=2;tr|A0A590UJ29|A0A590UJ29_HUMAN Disks large homolog 1 OS=Homo sapiens OX=9606 GN=DLG1 PE=1 SV=1;tr|A0A0C4DFT3|A0A0C4DFT3_HUMAN Disks large homolog 1 OS=Homo sapiens OX=96	17	1	1	1	0	0	0	0	0	1	0	0	0	0	0	1	0	0	0	0	0	1	2.9	2.9	2.9	63.083	551	551;744;892;883;879;878;875;874;868;865;839;833;821;819;772;925;904	0.00046318	2.0056						By matching	0	0	0	0	0	2.9
Q5JUW8;Q92796	Q5JUW8;Q92796	1;1	1;1	1;1	Disks large homolog 3	DLG3	tr|Q5JUW8|Q5JUW8_HUMAN Discs, large homolog 3 (Neuroendocrine-dlg, Drosophila), isoform CRA_b OS=Homo sapiens OX=9606 GN=DLG3 PE=1 SV=1;sp|Q92796|DLG3_HUMAN Disks large homolog 3 OS=Homo sapiens OX=9606 GN=DLG3 PE=1 SV=2	2	1	1	1	0	0	1	0	0	0	0	0	1	0	0	0	0	0	1	0	0	0	1.9	1.9	1.9	93.605	849	849;817	0.00046125	1.9491			By MS/MS				0	0	1.9	0	0	0
Q07687	Q07687	2	1	0	Homeobox protein DLX-2	DLX2	sp|Q07687|DLX2_HUMAN Homeobox protein DLX-2 OS=Homo sapiens OX=9606 GN=DLX2 PE=1 SV=2	1	2	1	0	1	0	1	1	0	1	0	0	1	0	0	0	0	0	0	0	0	0	6.1	4	0	34.242	328	328	0.0021805	1.5582	By matching		By MS/MS	By matching		By matching	2.1	0	4	2.1	0	2.1
P56178	P56178	2	1	0	Homeobox protein DLX-5	DLX5	sp|P56178|DLX5_HUMAN Homeobox protein DLX-5 OS=Homo sapiens OX=9606 GN=DLX5 PE=1 SV=2	1	2	1	0	1	1	1	1	1	0	1	1	0	1	1	0	0	0	0	0	0	0	7.3	2.8	0	31.54	289	289	1	-2	By MS/MS	By MS/MS	By matching	By MS/MS	By MS/MS		2.8	2.8	4.5	2.8	2.8	0
Q9NPF5;Q5TG40;Q5TG39;Q5TG36;Q5TG38	Q9NPF5;Q5TG40;Q5TG39	4;3;2;1;1	4;3;2;1;1	4;3;2;1;1	DNA methyltransferase 1-associated protein 1	DMAP1	sp|Q9NPF5|DMAP1_HUMAN DNA methyltransferase 1-associated protein 1 OS=Homo sapiens OX=9606 GN=DMAP1 PE=1 SV=1;tr|Q5TG40|Q5TG40_HUMAN DNA methyltransferase 1-associated protein 1 (Fragment) OS=Homo sapiens OX=9606 GN=DMAP1 PE=1 SV=1;tr|Q5TG39|Q5TG39_HUMAN D	5	4	4	4	0	0	3	0	0	2	0	0	3	0	0	2	0	0	3	0	0	2	16.7	16.7	16.7	52.992	467	467;302;285;151;237	0	7.3104			By MS/MS			By MS/MS	0	0	14.1	0	0	6.6
F5H269;Q9Y485	F5H269;Q9Y485	2;2	2;2	2;2	DmX-like protein 1	DMXL1	tr|F5H269|F5H269_HUMAN DmX-like protein 1 OS=Homo sapiens OX=9606 GN=DMXL1 PE=1 SV=1;sp|Q9Y485|DMXL1_HUMAN DmX-like protein 1 OS=Homo sapiens OX=9606 GN=DMXL1 PE=1 SV=3	2	2	2	2	0	0	1	0	0	2	0	0	1	0	0	2	0	0	1	0	0	2	1	1	1	340.24	3048	3048;3027	0.00047824	2.2229			By MS/MS			By MS/MS	0	0	0.6	0	0	1
A0A087WYC6;A0A0C4DFR0;Q96DT5	A0A087WYC6;A0A0C4DFR0;Q96DT5	1;1;1	1;1;1	1;1;1	Dynein heavy chain 11, axonemal	DNAH11	tr|A0A087WYC6|A0A087WYC6_HUMAN Dynein heavy chain 11, axonemal OS=Homo sapiens OX=9606 GN=DNAH11 PE=1 SV=1;tr|A0A0C4DFR0|A0A0C4DFR0_HUMAN Dynein heavy chain 11, axonemal OS=Homo sapiens OX=9606 GN=DNAH11 PE=1 SV=1;sp|Q96DT5|DYH11_HUMAN Dynein axonemal heav	3	1	1	1	1	1	0	1	1	0	1	1	0	1	1	0	1	1	0	1	1	0	0.3	0.3	0.3	521.05	4523	4523;4523;4516	1	-2	By MS/MS	By MS/MS		By MS/MS	By matching		0.3	0.3	0	0.3	0.3	0
Q8TD57;Q8WXX0	Q8TD57;Q8WXX0	2;1	2;1	2;1	Dynein heavy chain 3, axonemal;Dynein heavy chain 7, axonemal	DNAH3;DNAH7	sp|Q8TD57|DYH3_HUMAN Dynein axonemal heavy chain 3 OS=Homo sapiens OX=9606 GN=DNAH3 PE=2 SV=1;sp|Q8WXX0|DYH7_HUMAN Dynein axonemal heavy chain 7 OS=Homo sapiens OX=9606 GN=DNAH7 PE=1 SV=2	2	2	2	2	1	1	1	1	1	1	1	1	1	1	1	1	1	1	1	1	1	1	0.7	0.7	0.7	470.77	4116	4116;4024	0	2.6958	By MS/MS	By matching	By MS/MS	By MS/MS	By MS/MS	By MS/MS	0.3	0.3	0.4	0.3	0.3	0.4
H0Y7V4;A0A075B6F3;Q96JB1	H0Y7V4;A0A075B6F3;Q96JB1	1;1;1	1;1;1	1;1;1	Dynein heavy chain 8, axonemal	DNAH8	tr|H0Y7V4|H0Y7V4_HUMAN Dynein heavy chain 8, axonemal OS=Homo sapiens OX=9606 GN=DNAH8 PE=1 SV=1;tr|A0A075B6F3|A0A075B6F3_HUMAN Dynein heavy chain 8, axonemal OS=Homo sapiens OX=9606 GN=DNAH8 PE=1 SV=2;sp|Q96JB1|DYH8_HUMAN Dynein axonemal heavy chain 8 OS=	3	1	1	1	0	0	0	0	0	0	0	0	0	0	0	0	0	0	0	0	0	0	0.3	0.3	0.3	478.87	4188	4188;4707;4490	1	-2							0	0	0	0	0	0
C9JDE6;F5H170;Q8WW22	C9JDE6;F5H170;Q8WW22	2;2;2	2;2;2	2;2;2	DnaJ homolog subfamily A member 4	DNAJA4	tr|C9JDE6|C9JDE6_HUMAN DnaJ homolog subfamily A member 4 OS=Homo sapiens OX=9606 GN=DNAJA4 PE=1 SV=2;tr|F5H170|F5H170_HUMAN DnaJ homolog subfamily A member 4 OS=Homo sapiens OX=9606 GN=DNAJA4 PE=1 SV=1;sp|Q8WW22|DNJA4_HUMAN DnaJ homolog subfamily A member	3	2	2	2	1	1	1	1	2	0	1	1	1	1	2	0	1	1	1	1	2	0	10.4	10.4	10.4	23.4	211	211;219;397	0	3.7687	By matching	By MS/MS	By MS/MS	By MS/MS	By MS/MS		10	10	10	10	10.4	0
C9J1G2;E7ETU0;C9JX00;C9JRD2;C9JXB9;P25686	C9J1G2;E7ETU0;C9JX00;C9JRD2;C9JXB9;P25686	1;1;1;1;1;1	1;1;1;1;1;1	1;1;1;1;1;1	DnaJ homolog subfamily B member 2	DNAJB2	tr|C9J1G2|C9J1G2_HUMAN DnaJ homolog subfamily B member 2 (Fragment) OS=Homo sapiens OX=9606 GN=DNAJB2 PE=1 SV=1;tr|E7ETU0|E7ETU0_HUMAN DnaJ homolog subfamily B member 2 (Fragment) OS=Homo sapiens OX=9606 GN=DNAJB2 PE=1 SV=1;tr|C9JX00|C9JX00_HUMAN DnaJ homo	6	1	1	1	0	0	1	0	0	1	0	0	1	0	0	1	0	0	1	0	0	1	9	9	9	13.794	122	122;132;148;228;244;324	0.00673	1.1137			By MS/MS			By MS/MS	0	0	9	0	0	9
Q9UDY4	Q9UDY4	2	2	2	DnaJ homolog subfamily B member 4	DNAJB4	sp|Q9UDY4|DNJB4_HUMAN DnaJ homolog subfamily B member 4 OS=Homo sapiens OX=9606 GN=DNAJB4 PE=1 SV=1	1	2	2	2	0	0	1	0	0	0	0	0	1	0	0	0	0	0	1	0	0	0	7.7	7.7	7.7	37.806	337	337	0	3.3472			By MS/MS				0	0	3	0	0	0
C9JDR7;C9JDX6;F8WCZ4;C9J2P2;E9PH18;C9J2C4;A0A0J9YX62;O75190;C9JN01;C9JB42;Q8WWF6	C9JDR7;C9JDX6;F8WCZ4;C9J2P2;E9PH18;C9J2C4;A0A0J9YX62;O75190;C9JN01;C9JB42	3;3;3;3;3;3;3;3;2;2;1	2;2;2;2;2;2;2;2;1;1;0	2;2;2;2;2;2;2;2;1;1;0	DnaJ homolog subfamily B member 6	DNAJB6	tr|C9JDR7|C9JDR7_HUMAN DnaJ homolog subfamily B member 6 (Fragment) OS=Homo sapiens OX=9606 GN=DNAJB6 PE=1 SV=1;tr|C9JDX6|C9JDX6_HUMAN DnaJ homolog subfamily B member 6 (Fragment) OS=Homo sapiens OX=9606 GN=DNAJB6 PE=1 SV=1;tr|F8WCZ4|F8WCZ4_HUMAN DnaJ homo	11	3	2	2	1	0	2	0	2	2	1	0	1	0	1	1	1	0	1	0	1	1	44.9	35.7	35.7	11.258	98	98;125;129;145;211;228;334;326;45;66;145	0	7.2949	By MS/MS		By MS/MS		By MS/MS	By MS/MS	11.2	0	20.4	0	20.4	20.4
A0A7P0TB97;A0A7P0TAQ9;A0A7P0Z431;Q8IXB1;A0A7P0TB83;A0A7P0T9B7;A0A7P0TB22;E7EP04;A0A7P0Z4F2;A0A494C1G5	A0A7P0TB97;A0A7P0TAQ9;A0A7P0Z431;Q8IXB1	4;4;4;4;1;1;1;1;1;1	4;4;4;4;1;1;1;1;1;1	4;4;4;4;1;1;1;1;1;1	DnaJ homolog subfamily C member 10	DNAJC10	tr|A0A7P0TB97|A0A7P0TB97_HUMAN DnaJ homolog subfamily C member 10 OS=Homo sapiens OX=9606 GN=DNAJC10 PE=4 SV=1;tr|A0A7P0TAQ9|A0A7P0TAQ9_HUMAN DnaJ homolog subfamily C member 10 OS=Homo sapiens OX=9606 GN=DNAJC10 PE=4 SV=1;tr|A0A7P0Z431|A0A7P0Z431_HUMAN Dna	10	4	4	4	0	0	3	0	0	4	0	0	3	0	0	4	0	0	3	0	0	4	6.9	6.9	6.9	72.152	626	626;768;773;793;247;259;272;275;286;301	0	4.0277			By MS/MS			By MS/MS	0	0	5.6	0	0	6.9
S4R3W0;S4R368;S4R3E2;Q9UKB3	S4R3W0;S4R368;S4R3E2;Q9UKB3	1;1;1;1	1;1;1;1	1;1;1;1	DnaJ homolog subfamily C member 12	DNAJC12	tr|S4R3W0|S4R3W0_HUMAN DnaJ homolog subfamily C member 12 OS=Homo sapiens OX=9606 GN=DNAJC12 PE=1 SV=1;tr|S4R368|S4R368_HUMAN DnaJ homolog subfamily C member 12 OS=Homo sapiens OX=9606 GN=DNAJC12 PE=1 SV=1;tr|S4R3E2|S4R3E2_HUMAN DnaJ homolog subfamily C me	4	1	1	1	1	1	0	1	1	0	1	1	0	1	1	0	1	1	0	1	1	0	20	20	20	4.572	40	40;57;228;198	1	-2	By matching	By MS/MS		By MS/MS	By MS/MS		20	20	0	20	20	0
Q5F1R6	Q5F1R6	4	4	3	DnaJ homolog subfamily C member 21	DNAJC21	sp|Q5F1R6|DJC21_HUMAN DnaJ homolog subfamily C member 21 OS=Homo sapiens OX=9606 GN=DNAJC21 PE=1 SV=2	1	4	4	3	0	0	4	0	1	4	0	0	4	0	1	4	0	0	3	0	0	3	11.7	11.7	10	62.027	531	531	0	19.809			By MS/MS		By MS/MS	By MS/MS	0	0	11.7	0	1.7	11.7
Q9NX36	Q9NX36	1	1	1	DnaJ homolog subfamily C member 28	DNAJC28	sp|Q9NX36|DJC28_HUMAN DnaJ homolog subfamily C member 28 OS=Homo sapiens OX=9606 GN=DNAJC28 PE=1 SV=2	1	1	1	1	1	1	0	1	1	0	1	1	0	1	1	0	1	1	0	1	1	0	3.1	3.1	3.1	45.805	388	388	1	-2	By MS/MS	By MS/MS		By MS/MS	By MS/MS		3.1	3.1	0	3.1	3.1	0
Q8WXX5	Q8WXX5	4	4	4	DnaJ homolog subfamily C member 9	DNAJC9	sp|Q8WXX5|DNJC9_HUMAN DnaJ homolog subfamily C member 9 OS=Homo sapiens OX=9606 GN=DNAJC9 PE=1 SV=1	1	4	4	4	0	0	3	0	0	1	0	0	3	0	0	1	0	0	3	0	0	1	23.1	23.1	23.1	29.909	260	260	0	31.382			By MS/MS			By MS/MS	0	0	16.5	0	0	7.7
Q96M86;E9PM64	Q96M86;E9PM64	2;1	2;1	2;1	Dynein heavy chain domain-containing protein 1	DNHD1	sp|Q96M86|DNHD1_HUMAN Dynein heavy chain domain-containing protein 1 OS=Homo sapiens OX=9606 GN=DNHD1 PE=2 SV=2;tr|E9PM64|E9PM64_HUMAN Dynein heavy chain domain-containing protein 1 (Fragment) OS=Homo sapiens OX=9606 GN=DNHD1 PE=1 SV=2	2	2	2	2	0	0	0	0	0	2	0	0	0	0	0	2	0	0	0	0	0	2	0.7	0.7	0.7	533.64	4753	4753;360	0.0067353	1.1144						By MS/MS	0	0	0	0	0	0.7
O00429	O00429	1	1	1	Dynamin-1-like protein	DNM1L	sp|O00429|DNM1L_HUMAN Dynamin-1-like protein OS=Homo sapiens OX=9606 GN=DNM1L PE=1 SV=2	1	1	1	1	0	0	0	0	0	1	0	0	0	0	0	1	0	0	0	0	0	1	2.9	2.9	2.9	81.876	736	736	0	37.62						By MS/MS	0	0	0	0	0	2.9
A0A1B0GUX5;E5RHK8;A0A0D9SFB1;A0A0U1RQP1;A0A0D9SFE4;Q05193;Q9UQ16;P50570	A0A1B0GUX5;E5RHK8;A0A0D9SFB1;A0A0U1RQP1;A0A0D9SFE4;Q05193;Q9UQ16;P50570	1;1;1;1;1;1;1;1	1;1;1;1;1;1;1;1	1;1;1;1;1;1;1;1	Dynamin-1;Dynamin-3;Dynamin-2	DNM3;DNM1;DNM2	tr|A0A1B0GUX5|A0A1B0GUX5_HUMAN Dynamin-1 OS=Homo sapiens OX=9606 GN=DNM1 PE=1 SV=1;tr|E5RHK8|E5RHK8_HUMAN Dynamin GTPase OS=Homo sapiens OX=9606 GN=DNM3 PE=1 SV=1;tr|A0A0D9SFB1|A0A0D9SFB1_HUMAN Dynamin GTPase OS=Homo sapiens OX=9606 GN=DNM1 PE=1 SV=1;tr|A0	8	1	1	1	0	0	1	0	0	1	0	0	1	0	0	1	0	0	1	0	0	1	4.7	4.7	4.7	35.248	320	320;639;835;856;864;864;869;870	0.0025696	1.4455			By matching			By MS/MS	0	0	4.7	0	0	4.7
K7EKC3;K7ERQ1;K7ELB1;K7ENQ6;A0A7I2V311	K7EKC3;K7ERQ1;K7ELB1;K7ENQ6;A0A7I2V311	1;1;1;1;1	1;1;1;1;1	1;1;1;1;1		DNMT1	tr|K7EKC3|K7EKC3_HUMAN DNA (cytosine-5)-methyltransferase 1 (Fragment) OS=Homo sapiens OX=9606 GN=DNMT1 PE=1 SV=8;tr|K7ERQ1|K7ERQ1_HUMAN DNA (cytosine-5)-methyltransferase 1 (Fragment) OS=Homo sapiens OX=9606 GN=DNMT1 PE=1 SV=1;tr|K7ELB1|K7ELB1_HUMAN DNA (	5	1	1	1	0	0	0	0	0	0	0	0	0	0	0	0	0	0	0	0	0	0	56	56	56	2.723	25	25;71;94;119;1150	1	-2							0	0	0	0	0	0
J3KP30;Q5QJE6	J3KP30;Q5QJE6	1;1	1;1	1;1	Deoxynucleotidyltransferase terminal-interacting protein 2	DNTTIP2	tr|J3KP30|J3KP30_HUMAN Deoxynucleotidyltransferase terminal-interacting protein 2 OS=Homo sapiens OX=9606 GN=DNTTIP2 PE=1 SV=1;sp|Q5QJE6|TDIF2_HUMAN Deoxynucleotidyltransferase terminal-interacting protein 2 OS=Homo sapiens OX=9606 GN=DNTTIP2 PE=1 SV=2	2	1	1	1	0	0	1	0	0	0	0	0	1	0	0	0	0	0	1	0	0	0	2.8	2.8	2.8	66.174	601	601;756	0	50.183			By matching				0	0	2.8	0	0	0
Q96N67;A0A1B0GWE0;A0A1B0GUE9;A0A0U1RQG7;A0A0C4DGY6;A0A0U1RRC1;A0A0U1RQJ5;A0A1B0GVW2	Q96N67;A0A1B0GWE0	9;6;2;1;1;1;1;1	9;6;2;1;1;1;1;1	8;5;2;1;1;1;1;1	Dedicator of cytokinesis protein 7	DOCK7	sp|Q96N67|DOCK7_HUMAN Dedicator of cytokinesis protein 7 OS=Homo sapiens OX=9606 GN=DOCK7 PE=1 SV=4;tr|A0A1B0GWE0|A0A1B0GWE0_HUMAN Dedicator of cytokinesis protein 7 (Fragment) OS=Homo sapiens OX=9606 GN=DOCK7 PE=1 SV=1	8	9	9	8	1	1	2	1	1	4	1	1	2	1	1	4	1	1	2	1	1	4	5.7	5.7	4.8	242.56	2140	2140;1229;602;46;245;248;255;443	0	46.04	By matching	By matching	By MS/MS	By MS/MS	By matching	By MS/MS	0.6	0.6	1.4	0.6	0.6	2.5
Q9BVM2;Q5JQQ4;Q5JQQ2	Q9BVM2;Q5JQQ4	4;3;1	4;3;1	4;3;1	Protein DPCD	DPCD	sp|Q9BVM2|DPCD_HUMAN Protein DPCD OS=Homo sapiens OX=9606 GN=DPCD PE=1 SV=2;tr|Q5JQQ4|Q5JQQ4_HUMAN Protein DPCD OS=Homo sapiens OX=9606 GN=DPCD PE=1 SV=1	3	4	4	4	0	0	1	0	1	2	0	0	1	0	1	2	0	0	1	0	1	2	18.2	18.2	18.2	23.239	203	203;170;116	0	5.107			By MS/MS		By MS/MS	By MS/MS	0	0	4.9	0	6.9	10.8
Q9BQC3;H0YCR5;E9PLL2;E9PMH7;E9PJH6	Q9BQC3;H0YCR5	8;4;2;2;1	8;4;2;2;1	8;4;2;2;1	Diphthamide biosynthesis protein 2	DPH2	sp|Q9BQC3|DPH2_HUMAN 2-(3-amino-3-carboxypropyl)histidine synthase subunit 2 OS=Homo sapiens OX=9606 GN=DPH2 PE=1 SV=1;tr|H0YCR5|H0YCR5_HUMAN 2-(3-amino-3-carboxypropyl)histidine synthase subunit 2 (Fragment) OS=Homo sapiens OX=9606 GN=DPH2 PE=1 SV=1	5	8	8	8	1	1	1	1	2	2	1	1	1	1	2	2	1	1	1	1	2	2	30.1	30.1	30.1	52.082	489	489;262;100;147;52	0	27.732	By matching	By MS/MS	By MS/MS	By MS/MS	By MS/MS	By MS/MS	2.9	2.9	6.3	2.9	4.5	8.4
Q86TI2;M0R2A8;M0R2G6	Q86TI2;M0R2A8;M0R2G6	2;2;1	2;2;1	2;2;1	Dipeptidyl peptidase 9	DPP9	sp|Q86TI2|DPP9_HUMAN Dipeptidyl peptidase 9 OS=Homo sapiens OX=9606 GN=DPP9 PE=1 SV=3;tr|M0R2A8|M0R2A8_HUMAN Dipeptidyl peptidase 9 OS=Homo sapiens OX=9606 GN=DPP9 PE=1 SV=1;tr|M0R2G6|M0R2G6_HUMAN Dipeptidyl peptidase 9 (Fragment) OS=Homo sapiens OX=9606 G	3	2	2	2	0	0	1	0	0	0	0	0	1	0	0	0	0	0	1	0	0	0	2.4	2.4	2.4	98.262	863	863;518;140	0.0098822	0.95999			By MS/MS				0	0	1.4	0	0	0
Q8N6Q4;K7ELG1;K7ELH8;Q6ZPD9	Q8N6Q4;K7ELG1;K7ELH8;Q6ZPD9	1;1;1;1	1;1;1;1	1;1;1;1	Probable C-mannosyltransferase DPY19L3	DPY19L3	tr|Q8N6Q4|Q8N6Q4_HUMAN Dpy-19-like 3 (C. elegans) OS=Homo sapiens OX=9606 GN=DPY19L3 PE=1 SV=1;tr|K7ELG1|K7ELG1_HUMAN Probable C-mannosyltransferase DPY19L3 (Fragment) OS=Homo sapiens OX=9606 GN=DPY19L3 PE=1 SV=1;tr|K7ELH8|K7ELH8_HUMAN Probable C-mannosylt	4	1	1	1	0	0	1	0	0	1	0	0	1	0	0	1	0	0	1	0	0	1	15.7	15.7	15.7	11.586	102	102;126;688;716	1	-2			By matching			By MS/MS	0	0	15.7	0	0	15.7
A0A1C7CYX9;Q16555;E5RFU4;E9PD68;Q14194	A0A1C7CYX9;Q16555	13;13;2;1;1	13;13;2;1;1	13;13;2;1;1	Dihydropyrimidinase-related protein 2	DPYSL2	tr|A0A1C7CYX9|A0A1C7CYX9_HUMAN Dihydropyrimidinase-related protein 2 OS=Homo sapiens OX=9606 GN=DPYSL2 PE=1 SV=1;sp|Q16555|DPYL2_HUMAN Dihydropyrimidinase-related protein 2 OS=Homo sapiens OX=9606 GN=DPYSL2 PE=1 SV=1	5	13	13	13	0	0	10	0	1	8	0	0	10	0	1	8	0	0	10	0	1	8	28.4	28.4	28.4	73.502	677	677;572;170;570;572	0	88.552			By MS/MS		By matching	By MS/MS	0	0	20.7	0	1.3	16.8
Q9BPU6;E7EWB4	Q9BPU6	3;1	3;1	3;1	Dihydropyrimidinase-related protein 5	DPYSL5	sp|Q9BPU6|DPYL5_HUMAN Dihydropyrimidinase-related protein 5 OS=Homo sapiens OX=9606 GN=DPYSL5 PE=1 SV=1	2	3	3	3	0	0	1	0	0	0	0	0	1	0	0	0	0	0	1	0	0	0	10.8	10.8	10.8	61.421	564	564;189	0	46.763			By MS/MS				0	0	3.7	0	0	0
Q9Y295;H0YI06	Q9Y295	5;1	5;1	5;1	Developmentally-regulated GTP-binding protein 1	DRG1	sp|Q9Y295|DRG1_HUMAN Developmentally-regulated GTP-binding protein 1 OS=Homo sapiens OX=9606 GN=DRG1 PE=1 SV=1	2	5	5	5	0	0	1	1	0	4	0	0	1	1	0	4	0	0	1	1	0	4	17.4	17.4	17.4	40.542	367	367;56	0	5.375			By MS/MS	By MS/MS		By MS/MS	0	0	3.8	4.1	0	13.1
A8MZF9;P55039;J3QKW7;J3QR71;J3QRI9;J3QL90;J3KRL5;J3QKV7;J3QQI1;J3QLF3	A8MZF9;P55039;J3QKW7;J3QR71;J3QRI9	5;5;4;3;3;2;2;2;1;1	5;5;4;3;3;2;2;2;1;1	5;5;4;3;3;2;2;2;1;1	Developmentally-regulated GTP-binding protein 2	DRG2	tr|A8MZF9|A8MZF9_HUMAN Developmentally-regulated GTP-binding protein 2 OS=Homo sapiens OX=9606 GN=DRG2 PE=1 SV=1;sp|P55039|DRG2_HUMAN Developmentally-regulated GTP-binding protein 2 OS=Homo sapiens OX=9606 GN=DRG2 PE=1 SV=1;tr|J3QKW7|J3QKW7_HUMAN Developme	10	5	5	5	0	0	3	0	0	3	0	0	3	0	0	3	0	0	3	0	0	3	19.5	19.5	19.5	38.129	343	343;364;244;158;172;112;113;161;22;90	0	84.323			By MS/MS			By MS/MS	0	0	10.8	0	0	12.8
Q8TD84	Q8TD84	1	1	1	Down syndrome cell adhesion molecule-like protein 1	DSCAML1	sp|Q8TD84|DSCL1_HUMAN Down syndrome cell adhesion molecule-like protein 1 OS=Homo sapiens OX=9606 GN=DSCAML1 PE=1 SV=2	1	1	1	1	0	1	0	1	1	0	0	1	0	1	1	0	0	1	0	1	1	0	0.7	0.7	0.7	224.46	2053	2053	1	-2		By MS/MS		By MS/MS	By MS/MS		0	0.7	0	0.7	0.7	0
Q14126	Q14126	1	1	1	Desmoglein-2	DSG2	sp|Q14126|DSG2_HUMAN Desmoglein-2 OS=Homo sapiens OX=9606 GN=DSG2 PE=1 SV=2	1	1	1	1	0	1	0	1	1	0	0	1	0	1	1	0	0	1	0	1	1	0	1.6	1.6	1.6	122.29	1118	1118	0.0029737	1.409		By matching		By matching	By MS/MS		0	1.6	0	1.6	1.6	0
E9PHM6;F6QMI7;F8W9J4;A0A7P0T890;Q03001;A0A494C1D7;E7ETB9;Q6P0N6;A0A0U1RQJ2;H0YAT7;H0YC82;Q5T0V7	E9PHM6;F6QMI7;F8W9J4;A0A7P0T890;Q03001;A0A494C1D7	12;12;12;12;12;8;5;4;2;1;1;1	11;11;11;11;11;8;5;4;1;1;1;1	11;11;11;11;11;8;5;4;1;1;1;1	Dystonin	DST	tr|E9PHM6|E9PHM6_HUMAN Dystonin OS=Homo sapiens OX=9606 GN=DST PE=1 SV=3;tr|F6QMI7|F6QMI7_HUMAN Dystonin OS=Homo sapiens OX=9606 GN=DST PE=1 SV=2;tr|F8W9J4|F8W9J4_HUMAN Dystonin OS=Homo sapiens OX=9606 GN=DST PE=1 SV=1;tr|A0A7P0T890|A0A7P0T890_HUMAN Dyston	12	12	11	11	0	0	5	0	0	8	0	0	4	0	0	7	0	0	4	0	0	7	3.6	3.4	3.4	629.78	5497	5497;5537;7461;7818;7570;2383;1479;1143;2676;177;448;689	0	18.899			By MS/MS			By MS/MS	0	0	1.7	0	0	2.6
A0A1B0GW55;Q6RFH8;P0CJ87;Q9UBX2;P0CJ90;P0CJ89;P0CJ88;P0CJ86;P0CJ85	A0A1B0GW55;Q6RFH8;P0CJ87;Q9UBX2;P0CJ90;P0CJ89;P0CJ88;P0CJ86;P0CJ85	1;1;1;1;1;1;1;1;1	1;1;1;1;1;1;1;1;1	1;1;1;1;1;1;1;1;1	Double homeobox protein 4C;Double homeobox protein 4-like protein 4;Double homeobox protein 4;Double homeobox protein 4-like protein 7;Double homeobox protein 4-like protein 6;Double homeobox protein 4-like protein 5;Double homeobox protein 4-like protein 3;Double homeobox protein 4-like protein 2	DUX4L9;DUX4L4;DUX4;DUX4L7;DUX4L6;DUX4L5;DUX4L3;DUX4L2	tr|A0A1B0GW55|A0A1B0GW55_HUMAN Uncharacterized protein OS=Homo sapiens OX=9606 PE=4 SV=1;sp|Q6RFH8|DUX4C_HUMAN Double homeobox protein 4C OS=Homo sapiens OX=9606 GN=DUX4L9 PE=1 SV=1;sp|P0CJ87|DU4L4_HUMAN Double homeobox protein 4-like protein 4 OS=Homo sap	9	1	1	1	1	1	0	1	1	0	1	1	0	1	1	0	1	1	0	1	1	0	5.2	5.2	5.2	44.698	424	424;374;422;424;424;424;424;424;424	0.00046685	2.0524	By MS/MS	By MS/MS		By MS/MS	By MS/MS		5.2	5.2	0	5.2	5.2	0
Q13409;E9PGG1;E7EU01;E7EUM4;E7ERR6;E7ERH4;E7ET01;E7ETL8;E7EQU2;E7ESD3;E7EMU4;E7EV09;E7EQL5	Q13409;E9PGG1;E7EU01;E7EUM4;E7ERR6;E7ERH4;E7ET01;E7ETL8;E7EQU2;E7ESD3;E7EMU4;E7EV09;E7EQL5	2;1;1;1;1;1;1;1;1;1;1;1;1	2;1;1;1;1;1;1;1;1;1;1;1;1	2;1;1;1;1;1;1;1;1;1;1;1;1	Cytoplasmic dynein 1 intermediate chain 2	DYNC1I2	sp|Q13409|DC1I2_HUMAN Cytoplasmic dynein 1 intermediate chain 2 OS=Homo sapiens OX=9606 GN=DYNC1I2 PE=1 SV=3;tr|E9PGG1|E9PGG1_HUMAN Cytoplasmic dynein 1 intermediate chain 2 (Fragment) OS=Homo sapiens OX=9606 GN=DYNC1I2 PE=1 SV=1;tr|E7EU01|E7EU01_HUMAN Cyt	13	2	2	2	0	0	1	0	0	1	0	0	1	0	0	1	0	0	1	0	0	1	5.3	5.3	5.3	71.456	638	638;110;121;137;139;151;173;184;185;187;214;250;305	0	7.862			By MS/MS			By matching	0	0	3.4	0	0	3.4
O43237;J3KRI4	O43237;J3KRI4	3;2	2;2	2;2	Cytoplasmic dynein 1 light intermediate chain 2	DYNC1LI2	sp|O43237|DC1L2_HUMAN Cytoplasmic dynein 1 light intermediate chain 2 OS=Homo sapiens OX=9606 GN=DYNC1LI2 PE=1 SV=1;tr|J3KRI4|J3KRI4_HUMAN Dynein light intermediate chain (Fragment) OS=Homo sapiens OX=9606 GN=DYNC1LI2 PE=1 SV=1	2	3	2	2	0	0	1	0	0	3	0	0	0	0	0	2	0	0	0	0	0	2	10.6	7.9	7.9	54.099	492	492;167	0	4.0445			By matching			By MS/MS	0	0	2.6	0	0	10.6
E5RJK4;E5RFM8;Q8TCX1	E5RJK4;E5RFM8;Q8TCX1	1;1;1	1;1;1	1;1;1	Cytoplasmic dynein 2 light intermediate chain 1	DYNC2LI1	tr|E5RJK4|E5RJK4_HUMAN Cytoplasmic dynein 2 light intermediate chain 1 OS=Homo sapiens OX=9606 GN=DYNC2LI1 PE=1 SV=1;tr|E5RFM8|E5RFM8_HUMAN Cytoplasmic dynein 2 light intermediate chain 1 OS=Homo sapiens OX=9606 GN=DYNC2LI1 PE=1 SV=1;sp|Q8TCX1|DC2L1_HUMAN	3	1	1	1	0	0	0	0	0	0	0	0	0	0	0	0	0	0	0	0	0	0	22.2	22.2	22.2	7.9389	72	72;94;351	0.00088928	1.7009							0	0	0	0	0	0
P63167;F8VXL2;F8VRV5	P63167;F8VXL2;F8VRV5	6;3;3	6;3;3	3;3;3	Dynein light chain 1, cytoplasmic	DYNLL1	sp|P63167|DYL1_HUMAN Dynein light chain 1, cytoplasmic OS=Homo sapiens OX=9606 GN=DYNLL1 PE=1 SV=1;tr|F8VXL2|F8VXL2_HUMAN Dynein light chain OS=Homo sapiens OX=9606 GN=DYNLL1 PE=1 SV=1;tr|F8VRV5|F8VRV5_HUMAN Dynein light chain OS=Homo sapiens OX=9606 GN=DY	3	6	6	3	1	0	4	0	1	5	1	0	4	0	1	5	0	0	2	0	0	3	44.9	44.9	14.6	10.366	89	89;47;67	0	8.4796	By MS/MS		By MS/MS		By matching	By MS/MS	12.4	0	32.6	0	12.4	32.6
Q96FJ2	Q96FJ2	5	2	2	Dynein light chain 2, cytoplasmic	DYNLL2	sp|Q96FJ2|DYL2_HUMAN Dynein light chain 2, cytoplasmic OS=Homo sapiens OX=9606 GN=DYNLL2 PE=1 SV=1	1	5	2	2	1	0	4	0	1	3	0	0	2	0	0	1	0	0	2	0	0	1	44.9	14.6	14.6	10.35	89	89	0	4.0515	By matching		By MS/MS		By matching	By MS/MS	12.4	0	32.6	0	12.4	32.6
Q9NP97;Q8TF09;H3BNG9;H3BPA0;Q7Z4M1;H3BQI1;B1AKR6	Q9NP97;Q8TF09;H3BNG9;H3BPA0;Q7Z4M1;H3BQI1;B1AKR6	2;2;1;1;1;1;1	2;2;1;1;1;1;1	2;2;1;1;1;1;1	Dynein light chain roadblock-type 1;Dynein light chain roadblock-type 2	DYNLRB1;DYNLRB2	sp|Q9NP97|DLRB1_HUMAN Dynein light chain roadblock-type 1 OS=Homo sapiens OX=9606 GN=DYNLRB1 PE=1 SV=3;sp|Q8TF09|DLRB2_HUMAN Dynein light chain roadblock-type 2 OS=Homo sapiens OX=9606 GN=DYNLRB2 PE=1 SV=1;tr|H3BNG9|H3BNG9_HUMAN Dynein light chain roadbloc	7	2	2	2	1	0	2	1	1	1	1	0	2	1	1	1	1	0	2	1	1	1	21.9	21.9	21.9	10.921	96	96;96;40;44;54;125;148	0	2.6712	By MS/MS		By MS/MS	By MS/MS	By MS/MS	By MS/MS	9.4	0	21.9	9.4	9.4	9.4
A6NGJ0;P51808	A6NGJ0;P51808	1;1	1;1	1;1	Dynein light chain Tctex-type 3	DYNLT3	tr|A6NGJ0|A6NGJ0_HUMAN Dynein light chain Tctex-type 3 OS=Homo sapiens OX=9606 GN=DYNLT3 PE=1 SV=1;sp|P51808|DYLT3_HUMAN Dynein light chain Tctex-type 3 OS=Homo sapiens OX=9606 GN=DYNLT3 PE=1 SV=1	2	1	1	1	0	0	0	0	0	0	0	0	0	0	0	0	0	0	0	0	0	0	11.2	11.2	11.2	16.979	152	152;116	0.00451	1.2369							0	0	0	0	0	0
A0A2R8YDF3;A0A2R8Y6L5;A0A2R8Y6I6;Q13627;A0A2R8Y443;A0A2R8YEY4;M0R2X3;M0R131;E7EMI5;Q9Y463	A0A2R8YDF3;A0A2R8Y6L5;A0A2R8Y6I6;Q13627;A0A2R8Y443	4;4;4;4;3;1;1;1;1;1	4;4;4;4;3;1;1;1;1;1	4;4;4;4;3;1;1;1;1;1	Dual specificity tyrosine-phosphorylation-regulated kinase 1A	DYRK1A	tr|A0A2R8YDF3|A0A2R8YDF3_HUMAN Dual-specificity kinase (Fragment) OS=Homo sapiens OX=9606 GN=DYRK1A PE=1 SV=1;tr|A0A2R8Y6L5|A0A2R8Y6L5_HUMAN Dual-specificity kinase (Fragment) OS=Homo sapiens OX=9606 GN=DYRK1A PE=1 SV=1;tr|A0A2R8Y6I6|A0A2R8Y6I6_HUMAN Dual-	10	4	4	4	0	0	2	0	0	0	0	0	2	0	0	0	0	0	2	0	0	0	11.2	11.2	11.2	59.538	519	519;605;725;763;400;110;137;172;181;629	0	4.5971			By MS/MS				0	0	4.8	0	0	0
Q92630	Q92630	1	1	1	Dual specificity tyrosine-phosphorylation-regulated kinase 2	DYRK2	sp|Q92630|DYRK2_HUMAN Dual specificity tyrosine-phosphorylation-regulated kinase 2 OS=Homo sapiens OX=9606 GN=DYRK2 PE=1 SV=3	1	1	1	1	0	0	0	0	0	0	0	0	0	0	0	0	0	0	0	0	0	0	3	3	3	66.651	601	601	1	-2							0	0	0	0	0	0
Q8WXU2	Q8WXU2	1	1	1	Dyslexia susceptibility 1 candidate gene 1 protein	DYX1C1	sp|Q8WXU2|DAAF4_HUMAN Dynein axonemal assembly factor 4 OS=Homo sapiens OX=9606 GN=DNAAF4 PE=1 SV=2	1	1	1	1	0	0	1	0	0	1	0	0	1	0	0	1	0	0	1	0	0	1	3.8	3.8	3.8	48.526	420	420	1	-2			By MS/MS			By MS/MS	0	0	3.8	0	0	3.8
O00716	O00716	1	1	1	Transcription factor E2F3	E2F3	sp|O00716|E2F3_HUMAN Transcription factor E2F3 OS=Homo sapiens OX=9606 GN=E2F3 PE=1 SV=1	1	1	1	1	0	0	0	0	0	1	0	0	0	0	0	1	0	0	0	0	0	1	3.2	3.2	3.2	49.161	465	465	0.0095383	0.96938						By matching	0	0	0	0	0	3.2
C9JYE9;Q15329	C9JYE9;Q15329	1;1	1;1	1;1	Transcription factor E2F5	E2F5	tr|C9JYE9|C9JYE9_HUMAN Transcription factor E2F5 (Fragment) OS=Homo sapiens OX=9606 GN=E2F5 PE=1 SV=2;sp|Q15329|E2F5_HUMAN Transcription factor E2F5 OS=Homo sapiens OX=9606 GN=E2F5 PE=1 SV=1	2	1	1	1	0	0	0	0	0	0	0	0	0	0	0	0	0	0	0	0	0	0	6.8	6.8	6.8	27.394	249	249;346	0.0059642	1.1309							0	0	0	0	0	0
Q13011	Q13011	1	1	1	Delta(3,5)-Delta(2,4)-dienoyl-CoA isomerase, mitochondrial	ECH1	sp|Q13011|ECH1_HUMAN Delta(3,5)-Delta(2,4)-dienoyl-CoA isomerase, mitochondrial OS=Homo sapiens OX=9606 GN=ECH1 PE=1 SV=2	1	1	1	1	0	0	1	0	0	1	0	0	1	0	0	1	0	0	1	0	0	1	4.9	4.9	4.9	35.816	328	328	0	34.731			By MS/MS			By MS/MS	0	0	4.9	0	0	4.9
P30084	P30084	2	2	2	Enoyl-CoA hydratase, mitochondrial	ECHS1	sp|P30084|ECHM_HUMAN Enoyl-CoA hydratase, mitochondrial OS=Homo sapiens OX=9606 GN=ECHS1 PE=1 SV=4	1	2	2	2	0	0	1	0	0	0	0	0	1	0	0	0	0	0	1	0	0	0	13.1	13.1	13.1	31.387	290	290	0	6.9297			By MS/MS				0	0	7.2	0	0	0
A0A1B0GV26;Q8WWZ3	A0A1B0GV26;Q8WWZ3	1;1	1;1	1;1	Ectodysplasin-A receptor-associated adapter protein	EDARADD	tr|A0A1B0GV26|A0A1B0GV26_HUMAN Ectodysplasin-A receptor-associated adapter protein OS=Homo sapiens OX=9606 GN=EDARADD PE=1 SV=1;sp|Q8WWZ3|EDAD_HUMAN Ectodysplasin-A receptor-associated adapter protein OS=Homo sapiens OX=9606 GN=EDARADD PE=1 SV=3	2	1	1	1	0	0	0	0	0	0	0	0	0	0	0	0	0	0	0	0	0	0	9.3	9.3	9.3	22.383	193	193;215	0	50.668							0	0	0	0	0	0
Q6P2E9	Q6P2E9	1	1	1	Enhancer of mRNA-decapping protein 4	EDC4	sp|Q6P2E9|EDC4_HUMAN Enhancer of mRNA-decapping protein 4 OS=Homo sapiens OX=9606 GN=EDC4 PE=1 SV=1	1	1	1	1	0	1	1	0	0	1	0	1	1	0	0	1	0	1	1	0	0	1	1.4	1.4	1.4	151.66	1401	1401	0	3.7103		By matching	By MS/MS			By MS/MS	0	1.4	1.4	0	0	1.4
E9PJK2;A0A5F9ZI63;O75530	E9PJK2;A0A5F9ZI63;O75530	1;1;1	1;1;1	1;1;1	Polycomb protein EED	EED	tr|E9PJK2|E9PJK2_HUMAN Polycomb protein EED OS=Homo sapiens OX=9606 GN=EED PE=1 SV=1;tr|A0A5F9ZI63|A0A5F9ZI63_HUMAN Polycomb protein EED OS=Homo sapiens OX=9606 GN=EED PE=1 SV=2;sp|O75530|EED_HUMAN Polycomb protein EED OS=Homo sapiens OX=9606 GN=EED PE=1 S	3	1	1	1	0	0	0	0	0	0	0	0	0	0	0	0	0	0	0	0	0	0	3.6	3.6	3.6	40.634	361	361;501;441	0.0052546	1.1953							0	0	0	0	0	0
A0A2U3TZH3;Q05639;A0A2R8Y488;A0A2R8Y660;A0A2R8YDN5;A0A6Q8PFK6	A0A2U3TZH3;Q05639;A0A2R8Y488;A0A2R8Y660	14;14;8;7;5;3	2;2;1;1;1;0	2;2;1;1;1;0	Elongation factor 1-alpha 2	EEF1A2	tr|A0A2U3TZH3|A0A2U3TZH3_HUMAN Elongation factor 1-alpha OS=Homo sapiens OX=9606 GN=EEF1A2 PE=1 SV=1;sp|Q05639|EF1A2_HUMAN Elongation factor 1-alpha 2 OS=Homo sapiens OX=9606 GN=EEF1A2 PE=1 SV=1;tr|A0A2R8Y488|A0A2R8Y488_HUMAN Elongation factor 1-alpha 2 (F	6	14	2	2	4	4	8	4	2	11	0	0	0	0	0	0	0	0	0	0	0	0	28	8.1	8.1	54.34	496	496;463;173;152;106;59	0	2.4696	By matching	By matching	By matching	By matching	By matching	By matching	9.1	9.1	17.5	9.1	3.8	19.2
Q5THR3	Q5THR3	1	1	1	EF-hand calcium-binding domain-containing protein 6	EFCAB6	sp|Q5THR3|EFCB6_HUMAN EF-hand calcium-binding domain-containing protein 6 OS=Homo sapiens OX=9606 GN=EFCAB6 PE=1 SV=1	1	1	1	1	1	1	0	0	1	0	1	1	0	0	1	0	1	1	0	0	1	0	1.7	1.7	1.7	172.93	1501	1501	0.0055955	1.1485	By MS/MS	By MS/MS			By MS/MS		1.7	1.7	0	0	1.7	0
Q9BUP0;C9JTV4;Q8WYH2;A0A087X1Z2;H7C0I0	Q9BUP0;C9JTV4;Q8WYH2;A0A087X1Z2	5;3;3;3;1	4;2;2;2;1	4;2;2;2;1	EF-hand domain-containing protein D1	EFHD1;PP1187	sp|Q9BUP0|EFHD1_HUMAN EF-hand domain-containing protein D1 OS=Homo sapiens OX=9606 GN=EFHD1 PE=1 SV=1;tr|C9JTV4|C9JTV4_HUMAN EF-hand domain-containing protein D1 (Fragment) OS=Homo sapiens OX=9606 GN=EFHD1 PE=1 SV=1;tr|Q8WYH2|Q8WYH2_HUMAN EF-hand domain-co	5	5	4	4	1	0	3	0	1	2	1	0	3	0	1	1	1	0	3	0	1	1	20.9	16.3	16.3	26.927	239	239;81;127;142;99	0	5.8689	By matching		By MS/MS		By MS/MS	By MS/MS	4.6	0	16.3	0	4.6	10.9
Q504U8;E9PFD7;P00533	Q504U8;E9PFD7;P00533	1;1;1	1;1;1	1;1;1	Receptor protein-tyrosine kinase;Epidermal growth factor receptor	EGFR	tr|Q504U8|Q504U8_HUMAN Receptor protein-tyrosine kinase OS=Homo sapiens OX=9606 GN=EGFR PE=1 SV=1;tr|E9PFD7|E9PFD7_HUMAN Receptor protein-tyrosine kinase OS=Homo sapiens OX=9606 GN=EGFR PE=1 SV=3;sp|P00533|EGFR_HUMAN Epidermal growth factor receptor OS=Hom	3	1	1	1	0	0	1	0	0	1	0	0	1	0	0	1	0	0	1	0	0	1	1.4	1.4	1.4	120.69	1091	1091;1165;1210	1	-2			By MS/MS			By MS/MS	0	0	1.4	0	0	1.4
Q9GZT9;A0A590UJ78;G3V3M1;A0A590UJD6;A0A590UJK7;F8W1G2;A0A590UJT7;Q9H6Z9	Q9GZT9;A0A590UJ78	3;2;1;1;1;1;1;1	3;2;1;1;1;1;1;1	3;2;1;1;1;1;1;1	Egl nine homolog 1	EGLN1	sp|Q9GZT9|EGLN1_HUMAN Egl nine homolog 1 OS=Homo sapiens OX=9606 GN=EGLN1 PE=1 SV=1;tr|A0A590UJ78|A0A590UJ78_HUMAN Egl nine homolog 1 (Fragment) OS=Homo sapiens OX=9606 GN=EGLN1 PE=1 SV=1	8	3	3	3	0	0	0	0	1	0	0	0	0	0	1	0	0	0	0	0	1	0	9.9	9.9	9.9	46.02	426	426;175;79;81;139;145;159;239	0	2.7987					By MS/MS		0	0	0	0	4	0
O60739	O60739	4	4	1	Eukaryotic translation initiation factor 1b	EIF1B	sp|O60739|EIF1B_HUMAN Eukaryotic translation initiation factor 1b OS=Homo sapiens OX=9606 GN=EIF1B PE=1 SV=2	1	4	4	1	0	0	2	0	0	2	0	0	2	0	0	2	0	0	0	0	0	0	65.5	65.5	29.2	12.823	113	113	0	64.183			By MS/MS			By MS/MS	0	0	36.3	0	0	36.3
Q9BQI3	Q9BQI3	2	2	2	Eukaryotic translation initiation factor 2-alpha kinase 1	EIF2AK1	sp|Q9BQI3|E2AK1_HUMAN Eukaryotic translation initiation factor 2-alpha kinase 1 OS=Homo sapiens OX=9606 GN=EIF2AK1 PE=1 SV=2	1	2	2	2	0	0	1	0	0	1	0	0	1	0	0	1	0	0	1	0	0	1	4	4	4	71.106	630	630	0.00048309	2.3368			By MS/MS			By MS/MS	0	0	2.1	0	0	2.1
Q14232;H0YGG4;F5H0D0	Q14232;H0YGG4;F5H0D0	4;2;2	4;2;2	4;2;2	Translation initiation factor eIF-2B subunit alpha	EIF2B1	sp|Q14232|EI2BA_HUMAN Translation initiation factor eIF-2B subunit alpha OS=Homo sapiens OX=9606 GN=EIF2B1 PE=1 SV=1;tr|H0YGG4|H0YGG4_HUMAN Translation initiation factor eIF-2B subunit alpha (Fragment) OS=Homo sapiens OX=9606 GN=EIF2B1 PE=1 SV=1;tr|F5H0D0|	3	4	4	4	0	0	2	0	0	3	0	0	2	0	0	3	0	0	2	0	0	3	16.4	16.4	16.4	33.712	305	305;152;202	0	4.7664			By MS/MS			By MS/MS	0	0	7.2	0	0	11.8
P05198;H0YJS4;G3V4T5	P05198;H0YJS4;G3V4T5	2;1;1	2;1;1	2;1;1	Eukaryotic translation initiation factor 2 subunit 1	EIF2S1	sp|P05198|IF2A_HUMAN Eukaryotic translation initiation factor 2 subunit 1 OS=Homo sapiens OX=9606 GN=EIF2S1 PE=1 SV=3;tr|H0YJS4|H0YJS4_HUMAN Eukaryotic translation initiation factor 2 subunit 1 (Fragment) OS=Homo sapiens OX=9606 GN=EIF2S1 PE=1 SV=1;tr|G3V4	3	2	2	2	1	0	0	1	1	1	1	0	0	1	1	1	1	0	0	1	1	1	13	13	13	36.112	315	315;252;273	0	25.163	By MS/MS			By MS/MS	By MS/MS	By MS/MS	3.8	0	0	3.8	3.8	3.8
P20042	P20042	3	3	3	Eukaryotic translation initiation factor 2 subunit 2	EIF2S2	sp|P20042|IF2B_HUMAN Eukaryotic translation initiation factor 2 subunit 2 OS=Homo sapiens OX=9606 GN=EIF2S2 PE=1 SV=2	1	3	3	3	0	0	2	0	0	1	0	0	2	0	0	1	0	0	2	0	0	1	6.9	6.9	6.9	38.388	333	333	0.006722	1.1016			By MS/MS			By MS/MS	0	0	6.6	0	0	3.3
B3KS98;O15372;A0A087WZK9;E5RJT0;E5RFH0;E5RFW7;E5RGU4	B3KS98;O15372;A0A087WZK9;E5RJT0	12;12;10;6;3;2;2	12;12;10;6;3;2;2	12;12;10;6;3;2;2	Eukaryotic translation initiation factor 3 subunit H	EIF3H	tr|B3KS98|B3KS98_HUMAN Eukaryotic translation initiation factor 3 subunit H OS=Homo sapiens OX=9606 GN=EIF3H PE=1 SV=1;sp|O15372|EIF3H_HUMAN Eukaryotic translation initiation factor 3 subunit H OS=Homo sapiens OX=9606 GN=EIF3H PE=1 SV=1;tr|A0A087WZK9|A0A08	7	12	12	12	0	0	5	0	0	8	0	0	5	0	0	8	0	0	5	0	0	8	34.4	34.4	34.4	41.581	366	366;352;349;244;170;97;235	0	56.025			By MS/MS			By MS/MS	0	0	18	0	0	27
Q14240;E7EQG2;E7EMV8	Q14240;E7EQG2	17;15;2	4;2;0	4;2;0	Eukaryotic initiation factor 4A-II;Eukaryotic initiation factor 4A-II, N-terminally processed	EIF4A2	sp|Q14240|IF4A2_HUMAN Eukaryotic initiation factor 4A-II OS=Homo sapiens OX=9606 GN=EIF4A2 PE=1 SV=2;tr|E7EQG2|E7EQG2_HUMAN RNA helicase OS=Homo sapiens OX=9606 GN=EIF4A2 PE=1 SV=1	3	17	4	4	3	4	7	4	4	12	0	0	2	0	0	1	0	0	2	0	0	1	41	10.1	10.1	46.402	407	407;362;98	0	5.6084	By matching	By matching	By MS/MS	By matching	By matching	By MS/MS	8.4	9.6	23.8	13.8	9.6	30
P06730;D6RBW1;H0Y8J7	P06730;D6RBW1;H0Y8J7	3;3;2	3;3;2	3;3;2	Eukaryotic translation initiation factor 4E	EIF4E	sp|P06730|IF4E_HUMAN Eukaryotic translation initiation factor 4E OS=Homo sapiens OX=9606 GN=EIF4E PE=1 SV=2;tr|D6RBW1|D6RBW1_HUMAN Eukaryotic translation initiation factor 4E OS=Homo sapiens OX=9606 GN=EIF4E PE=1 SV=1;tr|H0Y8J7|H0Y8J7_HUMAN Eukaryotic tran	3	3	3	3	0	0	2	0	0	2	0	0	2	0	0	2	0	0	2	0	0	2	12.9	12.9	12.9	25.097	217	217;245;155	0.00048216	2.3002			By MS/MS			By MS/MS	0	0	7.8	0	0	7.8
Q13541	Q13541	3	3	3	Eukaryotic translation initiation factor 4E-binding protein 1	EIF4EBP1	sp|Q13541|4EBP1_HUMAN Eukaryotic translation initiation factor 4E-binding protein 1 OS=Homo sapiens OX=9606 GN=EIF4EBP1 PE=1 SV=3	1	3	3	3	2	1	0	1	2	0	2	1	0	1	2	0	2	1	0	1	2	0	32.2	32.2	32.2	12.58	118	118	0	4.2536	By MS/MS	By MS/MS		By MS/MS	By MS/MS		32.2	16.1	0	16.1	32.2	0
A0A0U1RQK7;A0A0A0MSA7;O43432	A0A0U1RQK7;A0A0A0MSA7;O43432	4;3;3	3;2;2	3;2;2	Eukaryotic translation initiation factor 4 gamma 3	EIF4G3	tr|A0A0U1RQK7|A0A0U1RQK7_HUMAN Eukaryotic translation initiation factor 4 gamma 3 OS=Homo sapiens OX=9606 GN=EIF4G3 PE=1 SV=2;tr|A0A0A0MSA7|A0A0A0MSA7_HUMAN Eukaryotic translation initiation factor 4 gamma 3 OS=Homo sapiens OX=9606 GN=EIF4G3 PE=1 SV=1;sp|O	3	4	3	3	1	1	2	1	1	2	1	1	1	1	1	1	1	1	1	1	1	1	2.7	2	2	195.3	1774	1774;1621;1585	0	3.7226	By MS/MS	By MS/MS	By MS/MS	By MS/MS	By MS/MS	By MS/MS	0.7	0.7	1.5	0.7	0.7	1.5
P55010;H0YLZ1;H0YN40	P55010	3;1;1	3;1;1	3;1;1	Eukaryotic translation initiation factor 5	EIF5	sp|P55010|IF5_HUMAN Eukaryotic translation initiation factor 5 OS=Homo sapiens OX=9606 GN=EIF5 PE=1 SV=2	3	3	3	3	0	0	1	0	0	2	0	0	1	0	0	2	0	0	1	0	0	2	10	10	10	49.222	431	431;146;200	0	4.2832			By MS/MS			By MS/MS	0	0	2.1	0	0	5.6
A0A087WUT6;O60841	A0A087WUT6;O60841	4;4	4;4	4;4	Eukaryotic translation initiation factor 5B	EIF5B	tr|A0A087WUT6|A0A087WUT6_HUMAN Eukaryotic translation initiation factor 5B OS=Homo sapiens OX=9606 GN=EIF5B PE=1 SV=1;sp|O60841|IF2P_HUMAN Eukaryotic translation initiation factor 5B OS=Homo sapiens OX=9606 GN=EIF5B PE=1 SV=4	2	4	4	4	0	0	3	0	0	1	0	0	3	0	0	1	0	0	3	0	0	1	6.6	6.6	6.6	138.68	1220	1220;1220	0	9.8014			By MS/MS			By MS/MS	0	0	4	0	0	1.4
A0A0A0MRX1;Q12926;B1AM48;C9JB16	A0A0A0MRX1;Q12926;B1AM48	3;3;2;1	1;1;1;1	1;1;1;1	ELAV-like protein;ELAV-like protein 2	ELAVL2	tr|A0A0A0MRX1|A0A0A0MRX1_HUMAN ELAV-like protein OS=Homo sapiens OX=9606 GN=ELAVL2 PE=1 SV=1;sp|Q12926|ELAV2_HUMAN ELAV-like protein 2 OS=Homo sapiens OX=9606 GN=ELAVL2 PE=1 SV=2;tr|B1AM48|B1AM48_HUMAN ELAV-like protein (Fragment) OS=Homo sapiens OX=9606 G	4	3	1	1	1	0	1	1	1	2	0	0	1	0	0	0	0	0	1	0	0	0	7.5	2.8	2.8	42.632	389	389;359;189;90	1	-2	By matching		By MS/MS	By matching	By matching	By matching	2.3	0	2.8	2.3	2.3	4.6
Q6IA86;K7ER35;F5GYE9;F5GWY6	Q6IA86	10;4;4;3	10;4;4;3	10;4;4;3	Elongator complex protein 2	ELP2	sp|Q6IA86|ELP2_HUMAN Elongator complex protein 2 OS=Homo sapiens OX=9606 GN=ELP2 PE=1 SV=2	4	10	10	10	0	2	3	0	1	4	0	2	3	0	1	4	0	2	3	0	1	4	16.7	16.7	16.7	92.499	826	826;101;120;51	0	28.135		By MS/MS	By MS/MS		By matching	By MS/MS	0	4.5	5.4	0	2.2	7.6
Q9H9T3;B4DKA4;E5RHY2;E5RIC0;E5RIZ7;E5RHR2	Q9H9T3;B4DKA4	6;4;2;2;2;2	6;4;2;2;2;2	6;4;2;2;2;2	Elongator complex protein 3	ELP3	sp|Q9H9T3|ELP3_HUMAN Elongator complex protein 3 OS=Homo sapiens OX=9606 GN=ELP3 PE=1 SV=2;tr|B4DKA4|B4DKA4_HUMAN Elongator complex protein 3 OS=Homo sapiens OX=9606 GN=ELP3 PE=1 SV=1	6	6	6	6	1	1	4	0	1	6	1	1	4	0	1	6	1	1	4	0	1	6	13.3	13.3	13.3	62.258	547	547;475;106;113;134;191	0	35.758	By MS/MS	By matching	By MS/MS		By matching	By MS/MS	3.7	2.6	6.9	0	3.7	13.3
Q96EB1;A0A1W2PQZ6;A0A1W2PRF5;A0A1W2PR08;A0A1X7SBS0;A0A1W2PS93;A0A1W2PPP6;A0A1W2PRJ0;A0A1W2PRF0;A0A1W2PNY5;A0A1W2PP47;G5E9D4;A0A1W2PNW2;A0A1W2PQA7;A0A1W2PPR3;E9PPJ9;A0A1W2PP49;A0A1W2PQ05;A0A1W2PS44;A0A1W2PNY4	Q96EB1;A0A1W2PQZ6;A0A1W2PRF5;A0A1W2PR08;A0A1X7SBS0;A0A1W2PS93;A0A1W2PPP6;A0A1W2PRJ0;A0A1W2PRF0;A0A1W2PNY5;A0A1W2PP47;G5E9D4;A0A1W2PNW2	5;5;5;5;5;5;5;5;5;5;5;5;3;2;1;1;1;1;1;1	5;5;5;5;5;5;5;5;5;5;5;5;3;2;1;1;1;1;1;1	5;5;5;5;5;5;5;5;5;5;5;5;3;2;1;1;1;1;1;1	Elongator complex protein 4	ELP4	sp|Q96EB1|ELP4_HUMAN Elongator complex protein 4 OS=Homo sapiens OX=9606 GN=ELP4 PE=1 SV=2;tr|A0A1W2PQZ6|A0A1W2PQZ6_HUMAN Elongator complex protein 4 OS=Homo sapiens OX=9606 GN=ELP4 PE=1 SV=1;tr|A0A1W2PRF5|A0A1W2PRF5_HUMAN Elongator complex protein 4 OS=Ho	20	5	5	5	1	1	0	1	2	3	1	1	0	1	2	3	1	1	0	1	2	3	15.8	15.8	15.8	46.587	424	424;392;475;450;425;425;424;396;395;386;359;535;234;265;101;185;138;131;131;58	0	4.543	By matching	By matching		By MS/MS	By MS/MS	By MS/MS	2.8	2.8	0	2.8	5.2	7.3
I3L1Q3;Q8TE02;I3L2A9;I3L2T0;I3L3N8;I3L437;I3L1A8;I3L200	I3L1Q3;Q8TE02;I3L2A9;I3L2T0;I3L3N8;I3L437	3;3;2;2;2;2;1;1	3;3;2;2;2;2;1;1	3;3;2;2;2;2;1;1	Elongator complex protein 5	ELP5	tr|I3L1Q3|I3L1Q3_HUMAN Elongator complex protein 5 (Fragment) OS=Homo sapiens OX=9606 GN=ELP5 PE=1 SV=1;sp|Q8TE02|ELP5_HUMAN Elongator complex protein 5 OS=Homo sapiens OX=9606 GN=ELP5 PE=1 SV=2;tr|I3L2A9|I3L2A9_HUMAN Elongator complex protein 5 (Fragment)	8	3	3	3	0	0	2	0	0	3	0	0	2	0	0	3	0	0	2	0	0	3	16	16	16	28.697	262	262;316;117;209;230;245;95;108	0	3.9257			By MS/MS			By MS/MS	0	0	10.7	0	0	16
C9JLH5;C9JA82;C9J2D6;C9J9N8;C9JEX8;C9IYN7;Q0PNE2;F8WE64	C9JLH5;C9JA82;C9J2D6;C9J9N8;C9JEX8;C9IYN7;Q0PNE2;F8WE64	4;4;4;4;4;4;4;2	4;4;4;4;4;4;4;2	4;4;4;4;4;4;4;2	Elongator complex protein 6	ELP6	tr|C9JLH5|C9JLH5_HUMAN Elongator complex protein 6 (Fragment) OS=Homo sapiens OX=9606 GN=ELP6 PE=1 SV=1;tr|C9JA82|C9JA82_HUMAN Elongator complex protein 6 (Fragment) OS=Homo sapiens OX=9606 GN=ELP6 PE=1 SV=1;tr|C9J2D6|C9J2D6_HUMAN Elongator complex protein	8	4	4	4	1	1	1	1	1	2	1	1	1	1	1	2	1	1	1	1	1	2	71.2	71.2	71.2	8.9643	80	80;99;113;151;157;193;266;68	0	10.775	By MS/MS	By MS/MS	By MS/MS	By MS/MS	By MS/MS	By MS/MS	18.8	18.8	18.8	18.8	18.8	31.2
E5RGJ2;Q15006	E5RGJ2;Q15006	1;1	1;1	1;1	ER membrane protein complex subunit 2	EMC2	tr|E5RGJ2|E5RGJ2_HUMAN ER membrane protein complex subunit 2 (Fragment) OS=Homo sapiens OX=9606 GN=EMC2 PE=1 SV=1;sp|Q15006|EMC2_HUMAN ER membrane protein complex subunit 2 OS=Homo sapiens OX=9606 GN=EMC2 PE=1 SV=1	2	1	1	1	0	0	0	0	0	1	0	0	0	0	0	1	0	0	0	0	0	1	17	17	17	13.48	112	112;297	0	3.642						By MS/MS	0	0	0	0	0	17
G3V195;G3V1D0;B7WPE2;H0Y3M3;Q32P44	G3V195;G3V1D0;B7WPE2;H0Y3M3;Q32P44	2;2;2;2;2	2;2;2;2;2	2;2;2;2;2	Echinoderm microtubule-associated protein-like 3	EML3	tr|G3V195|G3V195_HUMAN Echinoderm microtubule associated protein like 3, isoform CRA_c OS=Homo sapiens OX=9606 GN=EML3 PE=1 SV=1;tr|G3V1D0|G3V1D0_HUMAN Echinoderm microtubule associated protein like 3, isoform CRA_f OS=Homo sapiens OX=9606 GN=EML3 PE=1 SV=	5	2	2	2	0	0	0	0	0	0	0	0	0	0	0	0	0	0	0	0	0	0	5.2	5.2	5.2	73.281	679	679;889;897;911;896	0	10.138							0	0	0	0	0	0
B5MBZ0;Q9HC35	B5MBZ0;Q9HC35	2;2	2;2	2;2	Echinoderm microtubule-associated protein-like 4	EML4	tr|B5MBZ0|B5MBZ0_HUMAN Echinoderm microtubule-associated protein-like 4 OS=Homo sapiens OX=9606 GN=EML4 PE=1 SV=3;sp|Q9HC35|EMAL4_HUMAN Echinoderm microtubule-associated protein-like 4 OS=Homo sapiens OX=9606 GN=EML4 PE=1 SV=3	2	2	2	2	0	0	0	0	0	0	0	0	0	0	0	0	0	0	0	0	0	0	2.1	2.1	2.1	110.18	992	992;981	0	7.6508							0	0	0	0	0	0
A0A0U1RRM6;Q8N8S7	A0A0U1RRM6;Q8N8S7	1;1	1;1	1;1	Protein enabled homolog	ENAH	tr|A0A0U1RRM6|A0A0U1RRM6_HUMAN Protein enabled homolog OS=Homo sapiens OX=9606 GN=ENAH PE=1 SV=1;sp|Q8N8S7|ENAH_HUMAN Protein enabled homolog OS=Homo sapiens OX=9606 GN=ENAH PE=1 SV=2	2	1	1	1	0	0	0	0	0	0	0	0	0	0	0	0	0	0	0	0	0	0	1.9	1.9	1.9	87.399	802	802;591	0.0021758	1.5433							0	0	0	0	0	0
A0A669KB12;Q09472	A0A669KB12;Q09472	1;1	1;1	1;1	Histone acetyltransferase p300	EP300	tr|A0A669KB12|A0A669KB12_HUMAN Histone acetyltransferase OS=Homo sapiens OX=9606 GN=EP300 PE=1 SV=1;sp|Q09472|EP300_HUMAN Histone acetyltransferase p300 OS=Homo sapiens OX=9606 GN=EP300 PE=1 SV=2	2	1	1	1	0	0	1	0	0	1	0	0	1	0	0	1	0	0	1	0	0	1	0.9	0.9	0.9	261.38	2388	2388;2414	0.0017544	1.5933			By MS/MS			By MS/MS	0	0	0.9	0	0	0.9
P11171;A0A2R8Y7Y3;A0A2U3TZH6;A0A2R8YD30;A0A3B3ITP0;A0A2R8Y6D0;A0A2R8Y420;A0A2R8Y7N0;A0A1B0GWG0;A0A3B3IUD6;A0A2R8Y783;A0A2R8YFR9;A0A2R8Y6G5;A0A2R8YCW8;A0A2R8Y570;A0A2R8Y5G2;A0A2R8Y5Z6;A0A3B3IU06;A0A2R8Y4N6;A0A2R8Y5C8	P11171;A0A2R8Y7Y3;A0A2U3TZH6;A0A2R8YD30;A0A3B3ITP0;A0A2R8Y6D0;A0A2R8Y420;A0A2R8Y7N0;A0A1B0GWG0;A0A3B3IUD6;A0A2R8Y783;A0A2R8YFR9;A0A2R8Y6G5;A0A2R8YCW8;A0A2R8Y570;A0A2R8Y5G2;A0A2R8Y5Z6;A0A3B3IU06;A0A2R8Y4N6;A0A2R8Y5C8	2;2;2;2;1;1;1;1;1;1;1;1;1;1;1;1;1;1;1;1	2;2;2;2;1;1;1;1;1;1;1;1;1;1;1;1;1;1;1;1	2;2;2;2;1;1;1;1;1;1;1;1;1;1;1;1;1;1;1;1	Protein 4.1	EPB41	sp|P11171|EPB41_HUMAN Protein 4.1 OS=Homo sapiens OX=9606 GN=EPB41 PE=1 SV=4;tr|A0A2R8Y7Y3|A0A2R8Y7Y3_HUMAN Band 4.1 OS=Homo sapiens OX=9606 GN=EPB41 PE=1 SV=1;tr|A0A2U3TZH6|A0A2U3TZH6_HUMAN Band 4.1 OS=Homo sapiens OX=9606 GN=EPB41 PE=1 SV=1;tr|A0A2R8YD30	20	2	2	2	0	1	0	1	0	2	0	1	0	1	0	2	0	1	0	1	0	2	2.3	2.3	2.3	97.016	864	864;601;841;655;542;542;544;565;483;607;310;675;680;748;766;782;787;807;387;227	0.0021891	1.5743		By matching		By MS/MS		By MS/MS	0	0.9	0	0.9	0	2.3
H0Y482;A0A0C4DH22;A0A1B0GTW6;Q9H4G0	H0Y482;A0A0C4DH22;A0A1B0GTW6;Q9H4G0	1;1;1;1	1;1;1;1	1;1;1;1	Band 4.1-like protein 1	EPB41L1	tr|H0Y482|H0Y482_HUMAN Band 4.1-like protein 1 (Fragment) OS=Homo sapiens OX=9606 GN=EPB41L1 PE=1 SV=1;tr|A0A0C4DH22|A0A0C4DH22_HUMAN Band 4.1-like protein 1 OS=Homo sapiens OX=9606 GN=EPB41L1 PE=1 SV=1;tr|A0A1B0GTW6|A0A1B0GTW6_HUMAN Band 4.1-like protein	4	1	1	1	1	1	0	1	1	1	1	1	0	1	1	1	1	1	0	1	1	1	8.4	8.4	8.4	12.87	119	119;880;1595;881	1	-2	By MS/MS	By MS/MS		By MS/MS	By MS/MS	By MS/MS	8.4	8.4	0	8.4	8.4	8.4
P16452	P16452	1	1	1	Erythrocyte membrane protein band 4.2	EPB42	sp|P16452|EPB42_HUMAN Protein 4.2 OS=Homo sapiens OX=9606 GN=EPB42 PE=1 SV=3	1	1	1	1	0	0	0	0	0	1	0	0	0	0	0	1	0	0	0	0	0	1	2.3	2.3	2.3	77.008	691	691	1	-2						By MS/MS	0	0	0	0	0	2.3
E9PBA8;H7C0K5;E7ETK1;Q52LR7	E9PBA8;H7C0K5;E7ETK1;Q52LR7	1;1;1;1	1;1;1;1	1;1;1;1	Enhancer of polycomb homolog;Enhancer of polycomb homolog 2	EPC2	tr|E9PBA8|E9PBA8_HUMAN Enhancer of polycomb homolog 2 OS=Homo sapiens OX=9606 GN=EPC2 PE=1 SV=1;tr|H7C0K5|H7C0K5_HUMAN Enhancer of polycomb homolog 2 (Fragment) OS=Homo sapiens OX=9606 GN=EPC2 PE=1 SV=1;tr|E7ETK1|E7ETK1_HUMAN Enhancer of polycomb homolog (	4	1	1	1	1	1	0	1	1	0	1	1	0	1	1	0	1	1	0	1	1	0	9.1	9.1	9.1	14.2	121	121;126;160;807	1	-2	By MS/MS	By MS/MS		By MS/MS	By MS/MS		9.1	9.1	0	9.1	9.1	0
Q9UM22	Q9UM22	2	2	2	Mammalian ependymin-related protein 1	EPDR1	sp|Q9UM22|EPDR1_HUMAN Mammalian ependymin-related protein 1 OS=Homo sapiens OX=9606 GN=EPDR1 PE=1 SV=2	1	2	2	2	2	2	0	1	2	0	2	2	0	1	2	0	2	2	0	1	2	0	5.8	5.8	5.8	25.437	224	224	0	2.5778	By MS/MS	By MS/MS		By MS/MS	By MS/MS		5.8	5.8	0	4.9	5.8	0
P29317	P29317	1	1	1	Ephrin type-A receptor 2	EPHA2	sp|P29317|EPHA2_HUMAN Ephrin type-A receptor 2 OS=Homo sapiens OX=9606 GN=EPHA2 PE=1 SV=2	1	1	1	1	0	0	0	0	0	1	0	0	0	0	0	1	0	0	0	0	0	1	1.9	1.9	1.9	108.27	976	976	0.0056406	1.1861						By MS/MS	0	0	0	0	0	1.9
P42566;B1AUU8;S4R3U1	P42566;B1AUU8;S4R3U1	2;2;1	2;2;1	2;2;1	Epidermal growth factor receptor substrate 15	EPS15	sp|P42566|EPS15_HUMAN Epidermal growth factor receptor substrate 15 OS=Homo sapiens OX=9606 GN=EPS15 PE=1 SV=2;tr|B1AUU8|B1AUU8_HUMAN Epidermal growth factor receptor substrate 15 OS=Homo sapiens OX=9606 GN=EPS15 PE=1 SV=1;tr|S4R3U1|S4R3U1_HUMAN Epidermal	3	2	2	2	0	1	1	0	1	1	0	1	1	0	1	1	0	1	1	0	1	1	3.9	3.9	3.9	98.655	896	896;762;90	0	11.674		By MS/MS	By MS/MS		By matching	By MS/MS	0	2.6	1.3	0	2.6	1.3
P07992	P07992	1	1	1	DNA excision repair protein ERCC-1	ERCC1	sp|P07992|ERCC1_HUMAN DNA excision repair protein ERCC-1 OS=Homo sapiens OX=9606 GN=ERCC1 PE=1 SV=1	1	1	1	1	0	0	0	0	0	0	0	0	0	0	0	0	0	0	0	0	0	0	4.7	4.7	4.7	32.562	297	297	0.0052738	1.2054							0	0	0	0	0	0
K7EKI0;Q92817	K7EKI0;Q92817	2;2	2;2	2;2	Envoplakin	EVPL	tr|K7EKI0|K7EKI0_HUMAN Envoplakin OS=Homo sapiens OX=9606 GN=EVPL PE=1 SV=1;sp|Q92817|EVPL_HUMAN Envoplakin OS=Homo sapiens OX=9606 GN=EVPL PE=1 SV=3	2	2	2	2	1	0	1	1	1	0	1	0	1	1	1	0	1	0	1	1	1	0	1.1	1.1	1.1	233.83	2055	2055;2033	0.0067434	1.1177	By MS/MS		By MS/MS	By MS/MS	By MS/MS		0.5	0	0.6	0.5	0.5	0
A0A0A0MRE1;B4DJ07;A0A0A0MSB8;Q9UPT5	A0A0A0MRE1;B4DJ07;A0A0A0MSB8;Q9UPT5	2;2;2;2	2;2;2;2	2;2;2;2	Exocyst complex component 7	EXOC7	tr|A0A0A0MRE1|A0A0A0MRE1_HUMAN Exocyst complex component 7 (Fragment) OS=Homo sapiens OX=9606 GN=EXOC7 PE=1 SV=1;tr|B4DJ07|B4DJ07_HUMAN Exocyst complex component 7 OS=Homo sapiens OX=9606 GN=EXOC7 PE=1 SV=1;tr|A0A0A0MSB8|A0A0A0MSB8_HUMAN Exocyst complex co	4	2	2	2	0	0	1	0	0	1	0	0	1	0	0	1	0	0	1	0	0	1	4.9	4.9	4.9	70.2	617	617;656;693;735	0	3.9009			By MS/MS			By matching	0	0	2.6	0	0	2.3
M0R050;Q9NQT4	M0R050;Q9NQT4	4;4	4;4	4;4	Exosome complex component RRP46	EXOSC5	tr|M0R050|M0R050_HUMAN Exosome complex component RRP46 OS=Homo sapiens OX=9606 GN=EXOSC5 PE=1 SV=1;sp|Q9NQT4|EXOS5_HUMAN Exosome complex component RRP46 OS=Homo sapiens OX=9606 GN=EXOSC5 PE=1 SV=1	2	4	4	4	0	0	3	0	0	3	0	0	3	0	0	3	0	0	3	0	0	3	25.9	25.9	25.9	21.256	197	197;235	0	5.2791			By MS/MS			By MS/MS	0	0	13.7	0	0	13.7
P00451	P00451	1	1	1	Coagulation factor VIII;Factor VIIIa heavy chain, 200 kDa isoform;Factor VIIIa heavy chain, 92 kDa isoform;Factor VIII B chain;Factor VIIIa light chain	F8	sp|P00451|FA8_HUMAN Coagulation factor VIII OS=Homo sapiens OX=9606 GN=F8 PE=1 SV=1	1	1	1	1	1	0	1	1	1	1	1	0	1	1	1	1	1	0	1	1	1	1	0.3	0.3	0.3	267.01	2351	2351	1	-2	By MS/MS		By MS/MS	By matching	By matching	By MS/MS	0.3	0	0.3	0.3	0.3	0.3
Q9UNN5;B1ANM7;B3KT28	Q9UNN5;B1ANM7;B3KT28	7;7;5	7;7;5	7;7;5	FAS-associated factor 1	FAF1	sp|Q9UNN5|FAF1_HUMAN FAS-associated factor 1 OS=Homo sapiens OX=9606 GN=FAF1 PE=1 SV=2;tr|B1ANM7|B1ANM7_HUMAN FAS-associated factor 1 OS=Homo sapiens OX=9606 GN=FAF1 PE=1 SV=1;tr|B3KT28|B3KT28_HUMAN FAS-associated factor 1 OS=Homo sapiens OX=9606 GN=FAF1 P	3	7	7	7	1	0	2	0	0	4	1	0	2	0	0	4	1	0	2	0	0	4	15.4	15.4	15.4	73.953	650	650;490;464	0	6.6363	By MS/MS		By MS/MS			By MS/MS	2	0	4.5	0	0	8.3
P16930;H0YLC7	P16930;H0YLC7	2;1	2;1	2;1	Fumarylacetoacetase	FAH	sp|P16930|FAAA_HUMAN Fumarylacetoacetase OS=Homo sapiens OX=9606 GN=FAH PE=1 SV=2;tr|H0YLC7|H0YLC7_HUMAN Fumarylacetoacetase (Fragment) OS=Homo sapiens OX=9606 GN=FAH PE=1 SV=1	2	2	2	2	0	0	1	0	0	1	0	0	1	0	0	1	0	0	1	0	0	1	9.5	9.5	9.5	46.374	419	419;161	0	31.867			By MS/MS			By MS/MS	0	0	3.8	0	0	3.8
Q9NVQ4	Q9NVQ4	1	1	1	Fas apoptotic inhibitory molecule 1	FAIM	sp|Q9NVQ4|FAIM1_HUMAN Fas apoptotic inhibitory molecule 1 OS=Homo sapiens OX=9606 GN=FAIM PE=1 SV=1	1	1	1	1	0	0	1	0	0	1	0	0	1	0	0	1	0	0	1	0	0	1	15.1	15.1	15.1	20.215	179	179	0	7.3786			By MS/MS			By MS/MS	0	0	15.1	0	0	15.1
Q8N5W9	Q8N5W9	1	1	1	Filamin-interacting protein FAM101B	FAM101B	sp|Q8N5W9|RFLB_HUMAN Refilin-B OS=Homo sapiens OX=9606 GN=RFLNB PE=1 SV=1	1	1	1	1	0	0	1	0	0	1	0	0	1	0	0	1	0	0	1	0	0	1	6.1	6.1	6.1	22.882	214	214	0.00090212	1.8129			By MS/MS			By MS/MS	0	0	6.1	0	0	6.1
E9PIM5;G3V179;E9PMJ2;J3KP39;Q9BPY3;E9PMW3	E9PIM5;G3V179;E9PMJ2;J3KP39;Q9BPY3;E9PMW3	2;2;2;2;2;1	2;2;2;2;2;1	2;2;2;2;2;1	Protein FAM118B	FAM118B	tr|E9PIM5|E9PIM5_HUMAN Protein FAM118B (Fragment) OS=Homo sapiens OX=9606 GN=FAM118B PE=1 SV=1;tr|G3V179|G3V179_HUMAN Protein FAM118B OS=Homo sapiens OX=9606 GN=FAM118B PE=1 SV=1;tr|E9PMJ2|E9PMJ2_HUMAN Protein FAM118B (Fragment) OS=Homo sapiens OX=9606 GN=	6	2	2	2	0	0	0	0	1	0	0	0	0	0	1	0	0	0	0	0	1	0	18.3	18.3	18.3	26.539	235	235;275;346;350;351;153	0	3.0073					By MS/MS		0	0	0	0	11.9	0
A0A0C4DG79;Q9NZB2	A0A0C4DG79;Q9NZB2	1;1	1;1	1;1	Constitutive coactivator of PPAR-gamma-like protein 1	FAM120A	tr|A0A0C4DG79|A0A0C4DG79_HUMAN Constitutive coactivator of PPAR-gamma-like protein 1 (Fragment) OS=Homo sapiens OX=9606 GN=FAM120A PE=1 SV=1;sp|Q9NZB2|F120A_HUMAN Constitutive coactivator of PPAR-gamma-like protein 1 OS=Homo sapiens OX=9606 GN=FAM120A PE=1	2	1	1	1	0	1	1	0	0	0	0	1	1	0	0	0	0	1	1	0	0	0	2.6	2.6	2.6	54.193	494	494;1118	0.0066798	1.0833		By MS/MS	By MS/MS				0	2.6	2.6	0	0	0
F5GY05;A0A0D9SEJ5;Q96EK7	F5GY05;A0A0D9SEJ5;Q96EK7	6;6;6	6;6;6	6;6;6	Constitutive coactivator of peroxisome proliferator-activated receptor gamma	FAM120B	tr|F5GY05|F5GY05_HUMAN Constitutive coactivator of peroxisome proliferator-activated receptor gamma OS=Homo sapiens OX=9606 GN=FAM120B PE=1 SV=1;tr|A0A0D9SEJ5|A0A0D9SEJ5_HUMAN Constitutive coactivator of peroxisome proliferator-activated receptor gamma OS=	3	6	6	6	0	0	4	0	0	5	0	0	4	0	0	5	0	0	4	0	0	5	8.5	8.5	8.5	106.12	933	933;922;910	0	12.559			By MS/MS			By MS/MS	0	0	5.1	0	0	6.6
F8W881;Q9NX05	F8W881;Q9NX05	1;1	1;1	1;1	Constitutive coactivator of PPAR-gamma-like protein 2	FAM120C	tr|F8W881|F8W881_HUMAN Constitutive coactivator of PPAR-gamma-like protein 2 OS=Homo sapiens OX=9606 GN=FAM120C PE=1 SV=2;sp|Q9NX05|F120C_HUMAN Constitutive coactivator of PPAR-gamma-like protein 2 OS=Homo sapiens OX=9606 GN=FAM120C PE=1 SV=3	2	1	1	1	0	1	0	1	1	0	0	1	0	1	1	0	0	1	0	1	1	0	1.5	1.5	1.5	99.351	895	895;1096	1	-2		By MS/MS		By MS/MS	By matching		0	1.5	0	1.5	1.5	0
Q96E09	Q96E09	1	1	1	Protein FAM122A	FAM122A	sp|Q96E09|PBIR1_HUMAN PPP2R1A-PPP2R2A-interacting phosphatase regulator 1 OS=Homo sapiens OX=9606 GN=PABIR1 PE=1 SV=1	1	1	1	1	1	1	1	0	1	0	1	1	1	0	1	0	1	1	1	0	1	0	5.2	5.2	5.2	30.529	287	287	0.0013216	1.6221	By MS/MS	By matching	By MS/MS		By MS/MS		5.2	5.2	5.2	0	5.2	0
H7C0W7;A0A7P0T943;Q9BYI3	H7C0W7;A0A7P0T943;Q9BYI3	1;1;1	1;1;1	1;1;1	Hyccin	FAM126A	tr|H7C0W7|H7C0W7_HUMAN Hyccin OS=Homo sapiens OX=9606 GN=FAM126A PE=1 SV=2;tr|A0A7P0T943|A0A7P0T943_HUMAN Hyccin OS=Homo sapiens OX=9606 GN=FAM126A PE=4 SV=1;sp|Q9BYI3|HYCCI_HUMAN Hyccin OS=Homo sapiens OX=9606 GN=FAM126A PE=1 SV=2	3	1	1	1	0	0	0	0	0	1	0	0	0	0	0	1	0	0	0	0	0	1	6.2	6.2	6.2	30.692	275	275;377;521	0.0041511	1.3003						By MS/MS	0	0	0	0	0	6.2
Q96TA1	Q96TA1	1	1	1	Niban-like protein 1	FAM129B	sp|Q96TA1|NIBA2_HUMAN Protein Niban 2 OS=Homo sapiens OX=9606 GN=NIBAN2 PE=1 SV=3	1	1	1	1	0	0	1	0	0	0	0	0	1	0	0	0	0	0	1	0	0	0	1.7	1.7	1.7	84.137	746	746	0.009542	0.97147			By MS/MS				0	0	1.7	0	0	0
B5MCN5;Q6ZUX3	B5MCN5;Q6ZUX3	2;2	2;2	2;2	Protein FAM179A	FAM179A	tr|B5MCN5|B5MCN5_HUMAN TOG array regulator of axonemal microtubules protein 2 (Fragment) OS=Homo sapiens OX=9606 GN=TOGARAM2 PE=1 SV=1;sp|Q6ZUX3|TGRM2_HUMAN TOG array regulator of axonemal microtubules protein 2 OS=Homo sapiens OX=9606 GN=TOGARAM2 PE=2 SV=	2	2	2	2	0	0	1	1	1	0	0	0	1	1	1	0	0	0	1	1	1	0	10.5	10.5	10.5	18.151	162	162;1019	0.0021844	1.5685			By MS/MS	By matching	By MS/MS		0	0	6.8	6.8	9.9	0
E7EQ67;H7BY63;H0YBA5;A0A087X2A7;Q8NB25	E7EQ67;H7BY63;H0YBA5;A0A087X2A7;Q8NB25	2;2;2;2;2	2;2;2;2;2	2;2;2;2;2	Protein FAM184A	FAM184A	tr|E7EQ67|E7EQ67_HUMAN Protein FAM184A OS=Homo sapiens OX=9606 GN=FAM184A PE=1 SV=1;tr|H7BY63|H7BY63_HUMAN Protein FAM184A OS=Homo sapiens OX=9606 GN=FAM184A PE=1 SV=1;tr|H0YBA5|H0YBA5_HUMAN Protein FAM184A OS=Homo sapiens OX=9606 GN=FAM184A PE=1 SV=2;tr|A	5	2	2	2	1	1	0	1	1	0	1	1	0	1	1	0	1	1	0	1	1	0	4.3	4.3	4.3	61.449	529	529;936;996;1098;1140	0.0025641	1.4299	By MS/MS	By matching		By MS/MS	By MS/MS		2.3	2.3	0	2.3	2.3	0
A0A0C4DGG0;Q8IYM0	A0A0C4DGG0;Q8IYM0	1;1	1;1	1;1	Protein FAM186B	FAM186B	tr|A0A0C4DGG0|A0A0C4DGG0_HUMAN Protein FAM186B (Fragment) OS=Homo sapiens OX=9606 GN=FAM186B PE=1 SV=1;sp|Q8IYM0|F186B_HUMAN Protein FAM186B OS=Homo sapiens OX=9606 GN=FAM186B PE=2 SV=2	2	1	1	1	0	0	1	0	0	0	0	0	1	0	0	0	0	0	1	0	0	0	3	3	3	59.606	506	506;893	1	-2			By MS/MS				0	0	3	0	0	0
Q9H8M7;X6R9S5	Q9H8M7	4;1	4;1	4;1	Protein FAM188A	FAM188A	sp|Q9H8M7|MINY3_HUMAN Ubiquitin carboxyl-terminal hydrolase MINDY-3 OS=Homo sapiens OX=9606 GN=MINDY3 PE=1 SV=1	2	4	4	4	0	0	1	0	1	2	0	0	1	0	1	2	0	0	1	0	1	2	16	16	16	49.724	445	445;150	0	57.383			By MS/MS		By MS/MS	By MS/MS	0	0	3.4	0	1.8	11.5
Q9BUT9;I3L172	Q9BUT9	5;1	5;1	5;1	Protein FAM195A	FAM195A	sp|Q9BUT9|MCRI2_HUMAN MAPK regulated corepressor interacting protein 2 OS=Homo sapiens OX=9606 GN=MCRIP2 PE=1 SV=2	2	5	5	5	0	1	2	0	0	3	0	1	2	0	0	3	0	1	2	0	0	3	54.4	54.4	54.4	17.828	160	160;65	0	323.31		By MS/MS	By MS/MS			By MS/MS	0	6.9	15.6	0	0	35
C9JLW8;I3L2L5;I3L4Q0;I3L317;I3L3A7	C9JLW8;I3L2L5;I3L4Q0;I3L317	6;5;5;4;2	6;5;5;4;2	6;5;5;4;2	Protein FAM195B	FAM195B	sp|C9JLW8|MCRI1_HUMAN Mapk-regulated corepressor-interacting protein 1 OS=Homo sapiens OX=9606 GN=MCRIP1 PE=1 SV=1;tr|I3L2L5|I3L2L5_HUMAN Mapk-regulated corepressor-interacting protein 1 OS=Homo sapiens OX=9606 GN=MCRIP1 PE=1 SV=1;tr|I3L4Q0|I3L4Q0_HUMAN HC	5	6	6	6	0	0	5	0	1	5	0	0	5	0	1	5	0	0	5	0	1	5	73.2	73.2	73.2	10.92	97	97;92;118;117;63	0	19.822			By MS/MS		By MS/MS	By MS/MS	0	0	58.8	0	14.4	58.8
A6NMK8	A6NMK8	1	1	1	Protein FAM196B	FAM196B	sp|A6NMK8|INY2B_HUMAN Protein INSYN2B OS=Homo sapiens OX=9606 GN=INSYN2B PE=2 SV=1	1	1	1	1	0	0	1	0	0	1	0	0	1	0	0	1	0	0	1	0	0	1	2.1	2.1	2.1	59.203	535	535	1	-2			By MS/MS			By MS/MS	0	0	2.1	0	0	2.1
Q6PEV8	Q6PEV8	1	1	1	Protein FAM199X	FAM199X	sp|Q6PEV8|F199X_HUMAN Protein FAM199X OS=Homo sapiens OX=9606 GN=FAM199X PE=1 SV=1	1	1	1	1	0	0	1	0	0	1	0	0	1	0	0	1	0	0	1	0	0	1	3.9	3.9	3.9	42.801	388	388	0.00089646	1.7667			By MS/MS			By MS/MS	0	0	3.9	0	0	3.9
A0A2R8YH03;Q5VWN6	A0A2R8YH03;Q5VWN6	2;2	2;2	2;2	Protein FAM208B	FAM208B	tr|A0A2R8YH03|A0A2R8YH03_HUMAN Protein TASOR 2 OS=Homo sapiens OX=9606 GN=TASOR2 PE=1 SV=1;sp|Q5VWN6|TASO2_HUMAN Protein TASOR 2 OS=Homo sapiens OX=9606 GN=TASOR2 PE=1 SV=1	2	2	2	2	0	2	1	2	0	1	0	2	1	2	0	1	0	2	1	2	0	1	0.9	0.9	0.9	293.55	2645	2645;2430	0	3.1832		By MS/MS	By matching	By MS/MS		By MS/MS	0	0.9	0.5	0.9	0	0.5
Q9BRX8	Q9BRX8	1	1	1	Redox-regulatory protein FAM213A	FAM213A	sp|Q9BRX8|PXL2A_HUMAN Peroxiredoxin-like 2A OS=Homo sapiens OX=9606 GN=PRXL2A PE=1 SV=3	1	1	1	1	1	0	0	0	0	0	1	0	0	0	0	0	1	0	0	0	0	0	7	7	7	25.764	229	229	1	-2	By MS/MS						7	0	0	0	0	0
Q14320	Q14320	1	1	1	Protein FAM50A	FAM50A	sp|Q14320|FA50A_HUMAN Protein FAM50A OS=Homo sapiens OX=9606 GN=FAM50A PE=1 SV=2	1	1	1	1	1	0	0	0	1	0	1	0	0	0	1	0	1	0	0	0	1	0	3.5	3.5	3.5	40.241	339	339	0.0067167	1.0958	By MS/MS				By MS/MS		3.5	0	0	0	3.5	0
H0YN94;H0YN47;H0YLQ5;H0YKW2;H0YKL6;Q8TBF8	H0YN94;H0YN47;H0YLQ5;H0YKW2;H0YKL6;Q8TBF8	1;1;1;1;1;1	1;1;1;1;1;1	1;1;1;1;1;1	Protein FAM81A	FAM81A	tr|H0YN94|H0YN94_HUMAN Protein FAM81A (Fragment) OS=Homo sapiens OX=9606 GN=FAM81A PE=1 SV=1;tr|H0YN47|H0YN47_HUMAN Protein FAM81A (Fragment) OS=Homo sapiens OX=9606 GN=FAM81A PE=1 SV=1;tr|H0YLQ5|H0YLQ5_HUMAN Protein FAM81A (Fragment) OS=Homo sapiens OX=96	6	1	1	1	1	1	0	1	1	0	1	1	0	1	1	0	1	1	0	1	1	0	13	13	13	12.603	108	108;115;126;133;146;368	0.0074481	1.0761	By MS/MS	By MS/MS		By MS/MS	By MS/MS		13	13	0	13	13	0
Q658Y4;E7ER68;H0YBR6;G3V120;P0C866	Q658Y4;E7ER68	7;5;1;1;1	7;5;1;1;1	7;5;1;1;1	Protein FAM91A1	FAM91A1	sp|Q658Y4|F91A1_HUMAN Protein FAM91A1 OS=Homo sapiens OX=9606 GN=FAM91A1 PE=1 SV=3;tr|E7ER68|E7ER68_HUMAN Protein FAM91A1 OS=Homo sapiens OX=9606 GN=FAM91A1 PE=1 SV=1	5	7	7	7	0	0	3	0	0	4	0	0	3	0	0	4	0	0	3	0	0	4	9.8	9.8	9.8	93.908	838	838;789;114;218;280	0	9.4874			By MS/MS			By MS/MS	0	0	5	0	0	6.6
Q52LJ0;H0YNA1	Q52LJ0	11;1	6;1	6;1	Protein FAM98B	FAM98B	sp|Q52LJ0|FA98B_HUMAN Protein FAM98B OS=Homo sapiens OX=9606 GN=FAM98B PE=1 SV=2	2	11	6	6	0	2	7	4	1	10	0	0	4	1	0	6	0	0	4	1	0	6	29.8	20.8	20.8	45.547	433	433;101	0	26.026		By matching	By MS/MS	By matching	By matching	By MS/MS	0	3.7	17.3	6.5	3.2	29.3
A0A2R8YDV8;C9J5X9;Q8NB91	A0A2R8YDV8;C9J5X9;Q8NB91	1;1;1	1;1;1	1;1;1	Fanconi anemia group B protein	FANCB	tr|A0A2R8YDV8|A0A2R8YDV8_HUMAN Fanconi anemia group B protein OS=Homo sapiens OX=9606 GN=FANCB PE=1 SV=1;tr|C9J5X9|C9J5X9_HUMAN Fanconi anemia group B protein (Fragment) OS=Homo sapiens OX=9606 GN=FANCB PE=1 SV=1;sp|Q8NB91|FANCB_HUMAN Fanconi anemia group	3	1	1	1	0	1	0	0	0	0	0	1	0	0	0	0	0	1	0	0	0	0	4.2	4.2	4.2	37.739	333	333;818;859	0.0052824	1.2107		By matching					0	4.2	0	0	0	0
O94887	O94887	1	1	1	FERM, RhoGEF and pleckstrin domain-containing protein 2	FARP2	sp|O94887|FARP2_HUMAN FERM, ARHGEF and pleckstrin domain-containing protein 2 OS=Homo sapiens OX=9606 GN=FARP2 PE=1 SV=3	1	1	1	1	1	0	0	0	0	0	1	0	0	0	0	0	1	0	0	0	0	0	0.9	0.9	0.9	119.89	1054	1054	1	-2	By MS/MS						0.9	0	0	0	0	0
P49327;A0A0U1RQF0;J3KTF0;A0A0U1RRG3	P49327;A0A0U1RQF0	32;31;1;1	32;31;1;1	32;31;1;1	Fatty acid synthase;[Acyl-carrier-protein] S-acetyltransferase;[Acyl-carrier-protein] S-malonyltransferase;3-oxoacyl-[acyl-carrier-protein] synthase;3-oxoacyl-[acyl-carrier-protein] reductase;3-hydroxyacyl-[acyl-carrier-protein] dehydratase;Enoyl-[acyl-carrier-protein] reductase;Oleoyl-[acyl-carrier-protein] hydrolase	FASN	sp|P49327|FAS_HUMAN Fatty acid synthase OS=Homo sapiens OX=9606 GN=FASN PE=1 SV=3;tr|A0A0U1RQF0|A0A0U1RQF0_HUMAN 3-hydroxyacyl-[acyl-carrier-protein] dehydratase OS=Homo sapiens OX=9606 GN=FASN PE=1 SV=1	4	32	32	32	3	2	13	3	0	17	3	2	13	3	0	17	3	2	13	3	0	17	18.1	18.1	18.1	273.42	2511	2511;2509;78;150	0	111.33	By MS/MS	By MS/MS	By MS/MS	By MS/MS		By MS/MS	1.6	1	7.5	1.3	0	8.9
Q8WUP2;D6R9V9;D6R9I4;D6RA19;D6RAI6;E7EPI5;E7EWE8;E7EN81	Q8WUP2;D6R9V9;D6R9I4;D6RA19;D6RAI6;E7EPI5;E7EWE8;E7EN81	2;1;1;1;1;1;1;1	2;1;1;1;1;1;1;1	2;1;1;1;1;1;1;1	Filamin-binding LIM protein 1	FBLIM1	sp|Q8WUP2|FBLI1_HUMAN Filamin-binding LIM protein 1 OS=Homo sapiens OX=9606 GN=FBLIM1 PE=1 SV=2;tr|D6R9V9|D6R9V9_HUMAN Filamin-binding LIM protein 1 (Fragment) OS=Homo sapiens OX=9606 GN=FBLIM1 PE=1 SV=1;tr|D6R9I4|D6R9I4_HUMAN Filamin-binding LIM protein 1	8	2	2	2	0	0	1	0	0	0	0	0	1	0	0	0	0	0	1	0	0	0	8.6	8.6	8.6	40.669	373	373;30;31;34;78;104;144;144	0	3.6673			By MS/MS				0	0	3.8	0	0	0
E9PHW4;D6RJI3;P35556	E9PHW4;D6RJI3;P35556	1;1;1	1;1;1	1;1;1	Fibrillin-2	FBN2	tr|E9PHW4|E9PHW4_HUMAN Fibrillin-2 OS=Homo sapiens OX=9606 GN=FBN2 PE=1 SV=1;tr|D6RJI3|D6RJI3_HUMAN Fibrillin-2 OS=Homo sapiens OX=9606 GN=FBN2 PE=1 SV=1;sp|P35556|FBN2_HUMAN Fibrillin-2 OS=Homo sapiens OX=9606 GN=FBN2 PE=1 SV=3	3	1	1	1	1	1	0	1	1	0	1	1	0	1	1	0	1	1	0	1	1	0	7.3	7.3	7.3	36.796	341	341;1473;2912	0.00047962	2.2522	By matching	By MS/MS		By MS/MS	By matching		7.3	7.3	0	7.3	7.3	0
A0A3B3IUC7;P09467	A0A3B3IUC7;P09467	1;1	1;1	1;1	Fructose-1,6-bisphosphatase 1	FBP1	tr|A0A3B3IUC7|A0A3B3IUC7_HUMAN Fructose-bisphosphatase OS=Homo sapiens OX=9606 GN=FBP1 PE=1 SV=1;sp|P09467|F16P1_HUMAN Fructose-1,6-bisphosphatase 1 OS=Homo sapiens OX=9606 GN=FBP1 PE=1 SV=5	2	1	1	1	0	1	0	0	0	0	0	1	0	0	0	0	0	1	0	0	0	0	10.3	10.3	10.3	29.812	273	273;338	0.0044916	1.2247		By MS/MS					0	10.3	0	0	0	0
H0YIE9;Q4G104;O94952	H0YIE9;Q4G104;O94952	2;2;2	2;2;2	2;2;2	F-box only protein 21	FBXO21	tr|H0YIE9|H0YIE9_HUMAN F-box only protein 21 (Fragment) OS=Homo sapiens OX=9606 GN=FBXO21 PE=1 SV=1;tr|Q4G104|Q4G104_HUMAN F-box only protein 21 OS=Homo sapiens OX=9606 GN=FBXO21 PE=1 SV=1;sp|O94952|FBX21_HUMAN F-box only protein 21 OS=Homo sapiens OX=9606	3	2	2	2	0	0	2	0	0	1	0	0	2	0	0	1	0	0	2	0	0	1	8.1	8.1	8.1	59.162	505	505;537;628	0	21.495			By MS/MS			By MS/MS	0	0	8.1	0	0	3.6
H3BRE0;H3BTH6;Q8NEZ5	H3BRE0;H3BTH6;Q8NEZ5	2;2;2	2;2;2	2;2;2	F-box only protein 22	FBXO22	tr|H3BRE0|H3BRE0_HUMAN F-box only protein 22 OS=Homo sapiens OX=9606 GN=FBXO22 PE=1 SV=1;tr|H3BTH6|H3BTH6_HUMAN F-box only protein 22 (Fragment) OS=Homo sapiens OX=9606 GN=FBXO22 PE=1 SV=1;sp|Q8NEZ5|FBX22_HUMAN F-box only protein 22 OS=Homo sapiens OX=9606	3	2	2	2	0	0	1	0	0	1	0	0	1	0	0	1	0	0	1	0	0	1	38.7	38.7	38.7	10.304	93	93;241;403	0	7.9902			By matching			By MS/MS	0	0	15.1	0	0	23.7
G3V1E0;E9PJM3;Q9UK99	G3V1E0;E9PJM3;Q9UK99	1;1;1	1;1;1	1;1;1	F-box only protein 3	FBXO3	tr|G3V1E0|G3V1E0_HUMAN F-box only protein 3 OS=Homo sapiens OX=9606 GN=FBXO3 PE=1 SV=1;tr|E9PJM3|E9PJM3_HUMAN F-box only protein 3 OS=Homo sapiens OX=9606 GN=FBXO3 PE=1 SV=1;sp|Q9UK99|FBX3_HUMAN F-box only protein 3 OS=Homo sapiens OX=9606 GN=FBXO3 PE=1 SV	3	1	1	1	0	0	0	0	0	1	0	0	0	0	0	1	0	0	0	0	0	1	4.7	4.7	4.7	41.09	358	358;430;471	0	4.8222						By MS/MS	0	0	0	0	0	4.7
E5RGC1;Q9UKB1;B7Z3H4;Q9Y297	E5RGC1;Q9UKB1	8;8;3;3	8;8;3;3	8;8;3;3	F-box/WD repeat-containing protein 11	FBXW11	tr|E5RGC1|E5RGC1_HUMAN F-box/WD repeat-containing protein 11 OS=Homo sapiens OX=9606 GN=FBXW11 PE=1 SV=9;sp|Q9UKB1|FBW1B_HUMAN F-box/WD repeat-containing protein 11 OS=Homo sapiens OX=9606 GN=FBXW11 PE=1 SV=1	4	8	8	8	0	0	4	0	0	4	0	0	4	0	0	4	0	0	4	0	0	4	20.8	20.8	20.8	64.566	563	563;542;579;605	0	20.209			By MS/MS			By MS/MS	0	0	9.1	0	0	9.1
A0A0U1RRM8;H0YJ34;Q96AC1;H0YJB6	A0A0U1RRM8;H0YJ34;Q96AC1	3;3;3;1	3;3;3;1	3;3;3;1	Fermitin family homolog 2	FERMT2	tr|A0A0U1RRM8|A0A0U1RRM8_HUMAN Fermitin family homolog 2 (Fragment) OS=Homo sapiens OX=9606 GN=FERMT2 PE=1 SV=1;tr|H0YJ34|H0YJ34_HUMAN Fermitin family homolog 2 (Fragment) OS=Homo sapiens OX=9606 GN=FERMT2 PE=1 SV=1;sp|Q96AC1|FERM2_HUMAN Fermitin family ho	4	3	3	3	0	0	0	0	0	2	0	0	0	0	0	2	0	0	0	0	0	2	9.7	9.7	9.7	61.796	545	545;640;680;133	0	10.005						By matching	0	0	0	0	0	7
P07954	P07954	4	4	4	Fumarate hydratase, mitochondrial	FH	sp|P07954|FUMH_HUMAN Fumarate hydratase, mitochondrial OS=Homo sapiens OX=9606 GN=FH PE=1 SV=3	1	4	4	4	0	0	3	0	0	3	0	0	3	0	0	3	0	0	3	0	0	3	12.5	12.5	12.5	54.636	510	510	0	5.8062			By MS/MS			By MS/MS	0	0	10.8	0	0	10.8
Q1JUQ3;Q5W0X3;A0A087WZM5;A0A087WTS4;A0A087WV48;A0A7I2V3S6;P62942	Q1JUQ3;Q5W0X3;A0A087WZM5;A0A087WTS4;A0A087WV48;A0A7I2V3S6;P62942	2;2;2;2;2;2;2	2;2;2;2;2;2;2	2;2;2;2;2;2;2	Peptidyl-prolyl cis-trans isomerase;Peptidyl-prolyl cis-trans isomerase FKBP1A	FKBP12-Exin;FKBP1A	tr|Q1JUQ3|Q1JUQ3_HUMAN FK506 binding protein12 OS=Homo sapiens OX=9606 GN=FKBP1A PE=2 SV=1;tr|Q5W0X3|Q5W0X3_HUMAN FK506 binding protein12 OS=Homo sapiens OX=9606 GN=FKBP1A PE=1 SV=2;tr|A0A087WZM5|A0A087WZM5_HUMAN Peptidylprolyl isomerase OS=Homo sapiens OX	7	2	2	2	2	1	0	1	2	1	2	1	0	1	2	1	2	1	0	1	2	1	45.9	45.9	45.9	3.9655	37	37;89;94;97;116;129;108	0	3.4817	By MS/MS	By MS/MS		By MS/MS	By MS/MS	By MS/MS	45.9	45.9	0	45.9	45.9	35.1
Q00688	Q00688	1	1	1	Peptidyl-prolyl cis-trans isomerase FKBP3	FKBP3	sp|Q00688|FKBP3_HUMAN Peptidyl-prolyl cis-trans isomerase FKBP3 OS=Homo sapiens OX=9606 GN=FKBP3 PE=1 SV=1	1	1	1	1	0	0	1	0	0	1	0	0	1	0	0	1	0	0	1	0	0	1	8.5	8.5	8.5	25.177	224	224	0.0025685	1.4428			By MS/MS			By MS/MS	0	0	8.5	0	0	8.5
CON__Q5D862;Q5D862	CON__Q5D862;Q5D862	2;2	2;2	2;2	Filaggrin-2	FLG2	;sp|Q5D862|FILA2_HUMAN Filaggrin-2 OS=Homo sapiens OX=9606 GN=FLG2 PE=1 SV=1	2	2	2	2	0	0	1	0	0	1	0	0	1	0	0	1	0	0	1	0	0	1	1	1	1	248.07	2391	2391;2391	0	3.3673			By MS/MS			By MS/MS	0	0	0.5	0	0	0.5
Q14315	Q14315	7	4	4	Filamin-C	FLNC	sp|Q14315|FLNC_HUMAN Filamin-C OS=Homo sapiens OX=9606 GN=FLNC PE=1 SV=3	1	7	4	4	1	1	2	1	1	3	1	1	2	1	1	2	1	1	2	1	1	2	2.9	1.8	1.8	291.02	2725	2725	0	6.1338	By MS/MS	By matching	By MS/MS	By MS/MS	By MS/MS	By MS/MS	0.4	0.3	1.1	0.3	0.4	1.5
A0A5F9ZHS8;H0YM30;Q68DA7;H0YLM7	A0A5F9ZHS8;H0YM30;Q68DA7;H0YLM7	2;2;2;1	2;2;2;1	2;2;2;1	Formin-1	FMN1	tr|A0A5F9ZHS8|A0A5F9ZHS8_HUMAN Formin-1 OS=Homo sapiens OX=9606 GN=FMN1 PE=1 SV=1;tr|H0YM30|H0YM30_HUMAN Formin-1 OS=Homo sapiens OX=9606 GN=FMN1 PE=1 SV=1;sp|Q68DA7|FMN1_HUMAN Formin-1 OS=Homo sapiens OX=9606 GN=FMN1 PE=1 SV=3;tr|H0YLM7|H0YLM7_HUMAN Formi	4	2	2	2	1	1	0	1	0	0	1	1	0	1	0	0	1	1	0	1	0	0	4	4	4	95.167	841	841;1321;1419;181	1	-2	By matching	By matching		By MS/MS			3.1	3.1	0	3.1	0	0
Q96PY5	Q96PY5	1	1	1	Formin-like protein 2	FMNL2	sp|Q96PY5|FMNL2_HUMAN Formin-like protein 2 OS=Homo sapiens OX=9606 GN=FMNL2 PE=1 SV=3	1	1	1	1	0	0	1	0	0	0	0	0	1	0	0	0	0	0	1	0	0	0	1.2	1.2	1.2	123.32	1086	1086	1	-2			By MS/MS				0	0	1.2	0	0	0
A0A075B6Q2;Q5T0N5	A0A075B6Q2;Q5T0N5	1;1	1;1	1;1	Formin-binding protein 1-like	FNBP1L	tr|A0A075B6Q2|A0A075B6Q2_HUMAN Formin-binding protein 1-like (Fragment) OS=Homo sapiens OX=9606 GN=FNBP1L PE=1 SV=1;sp|Q5T0N5|FBP1L_HUMAN Formin-binding protein 1-like OS=Homo sapiens OX=9606 GN=FNBP1L PE=1 SV=3	2	1	1	1	0	0	1	0	0	1	0	0	1	0	0	1	0	0	1	0	0	1	4.4	4.4	4.4	51.232	451	451;605	0.0004649	2.0253			By MS/MS			By MS/MS	0	0	4.4	0	0	4.4
P49354;B3KVN2;E9PQP6;H0YCW1	P49354;B3KVN2;E9PQP6	5;3;3;2	5;3;3;2	5;3;3;2	Protein farnesyltransferase/geranylgeranyltransferase type-1 subunit alpha	FNTA	sp|P49354|FNTA_HUMAN Protein farnesyltransferase/geranylgeranyltransferase type-1 subunit alpha OS=Homo sapiens OX=9606 GN=FNTA PE=1 SV=1;tr|B3KVN2|B3KVN2_HUMAN Farnesyltransferase, CAAX box, alpha, isoform CRA_c OS=Homo sapiens OX=9606 GN=FNTA PE=1 SV=1;t	4	5	5	5	0	1	3	0	0	3	0	1	3	0	0	3	0	1	3	0	0	3	15.3	15.3	15.3	44.408	379	379;228;249;196	0	6.1838		By MS/MS	By MS/MS			By MS/MS	0	4.2	10.3	0	0	10.3
P49356	P49356	3	3	1	Protein farnesyltransferase subunit beta	FNTB	sp|P49356|FNTB_HUMAN Protein farnesyltransferase subunit beta OS=Homo sapiens OX=9606 GN=FNTB PE=1 SV=1	1	3	3	1	0	0	1	0	0	1	0	0	1	0	0	1	0	0	1	0	0	1	13.5	13.5	7.1	48.773	437	437	0	32.998			By MS/MS			By MS/MS	0	0	7.1	0	0	7.1
Q12948	Q12948	3	3	3	Forkhead box protein C1	FOXC1	sp|Q12948|FOXC1_HUMAN Forkhead box protein C1 OS=Homo sapiens OX=9606 GN=FOXC1 PE=1 SV=3	1	3	3	3	2	2	1	2	3	1	2	2	1	2	3	1	2	2	1	2	3	1	8.5	8.5	8.5	56.788	553	553	0	7.4275	By MS/MS	By MS/MS	By MS/MS	By MS/MS	By MS/MS	By MS/MS	4.3	4.3	2.2	6.3	8.5	2.2
P58012	P58012	1	1	1	Forkhead box protein L2	FOXL2	sp|P58012|FOXL2_HUMAN Forkhead box protein L2 OS=Homo sapiens OX=9606 GN=FOXL2 PE=1 SV=1	1	1	1	1	0	0	0	0	0	0	0	0	0	0	0	0	0	0	0	0	0	0	2.7	2.7	2.7	38.772	376	376	1	-2							0	0	0	0	0	0
H0YJG3;H0YJ94;H0YJ22;H0YJY0;H0YJ54;G3V3A7;O00409	H0YJG3;H0YJ94;H0YJ22;H0YJY0;H0YJ54;G3V3A7;O00409	1;1;1;1;1;1;1	1;1;1;1;1;1;1	1;1;1;1;1;1;1	Forkhead box protein N3	FOXN3	tr|H0YJG3|H0YJG3_HUMAN Forkhead box protein N3 (Fragment) OS=Homo sapiens OX=9606 GN=FOXN3 PE=1 SV=1;tr|H0YJ94|H0YJ94_HUMAN Forkhead box protein N3 (Fragment) OS=Homo sapiens OX=9606 GN=FOXN3 PE=1 SV=1;tr|H0YJ22|H0YJ22_HUMAN Forkhead box protein N3 (Fragme	7	1	1	1	1	1	1	1	1	1	1	1	1	1	1	1	1	1	1	1	1	1	11.8	11.8	11.8	8.7719	76	76;91;111;122;185;208;490	0.0056315	1.1795	By MS/MS	By MS/MS	By MS/MS	By MS/MS	By MS/MS	By MS/MS	11.8	11.8	11.8	11.8	11.8	11.8
O43524;A0A2Z4LIS9	O43524	3;1	3;1	3;1	Forkhead box protein O3	FOXO3	sp|O43524|FOXO3_HUMAN Forkhead box protein O3 OS=Homo sapiens OX=9606 GN=FOXO3 PE=1 SV=1	2	3	3	3	0	0	2	0	0	1	0	0	2	0	0	1	0	0	2	0	0	1	8.6	8.6	8.6	71.276	673	673;290	0	26.004			By MS/MS			By matching	0	0	6.5	0	0	2.8
A8MYZ6;Q12778	A8MYZ6;Q12778	1;1	1;1	1;1	Forkhead box protein O6;Forkhead box protein O1	FOXO6;FOXO1	sp|A8MYZ6|FOXO6_HUMAN Forkhead box protein O6 OS=Homo sapiens OX=9606 GN=FOXO6 PE=1 SV=1;sp|Q12778|FOXO1_HUMAN Forkhead box protein O1 OS=Homo sapiens OX=9606 GN=FOXO1 PE=1 SV=2	2	1	1	1	1	1	1	0	1	1	1	1	1	0	1	1	1	1	1	0	1	1	2.8	2.8	2.8	50.594	492	492;655	0.0008881	1.6928	By matching	By matching	By matching		By matching	By matching	2.8	2.8	2.8	0	2.8	2.8
G3V1D1;G3V192;P02794	G3V1D1;G3V192;P02794	1;1;1	1;1;1	1;1;1	Ferritin;Ferritin heavy chain;Ferritin heavy chain, N-terminally processed	FTH1	tr|G3V1D1|G3V1D1_HUMAN Ferritin OS=Homo sapiens OX=9606 GN=FTH1 PE=1 SV=1;tr|G3V192|G3V192_HUMAN Ferritin OS=Homo sapiens OX=9606 GN=FTH1 PE=1 SV=1;sp|P02794|FRIH_HUMAN Ferritin heavy chain OS=Homo sapiens OX=9606 GN=FTH1 PE=1 SV=2	3	1	1	1	1	0	0	0	1	0	1	0	0	0	1	0	1	0	0	0	1	0	11.5	11.5	11.5	12.876	113	113;153;183	0.0091884	0.97958	By MS/MS				By MS/MS		11.5	0	0	0	11.5	0
Q9UET6	Q9UET6	2	2	2	Putative tRNA (cytidine(32)/guanosine(34)-2-O)-methyltransferase	FTSJ1	sp|Q9UET6|TRM7_HUMAN Putative tRNA (cytidine(32)/guanosine(34)-2-O)-methyltransferase OS=Homo sapiens OX=9606 GN=FTSJ1 PE=1 SV=2	1	2	2	2	0	0	2	0	0	2	0	0	2	0	0	2	0	0	2	0	0	2	10.3	10.3	10.3	36.079	329	329	0	5.5921			By MS/MS			By MS/MS	0	0	10.3	0	0	10.3
P06241;E5RFS5;E5RH71;E5RIX5	P06241	8;2;1;1	8;2;1;1	4;1;1;1	Tyrosine-protein kinase Fyn	FYN	sp|P06241|FYN_HUMAN Tyrosine-protein kinase Fyn OS=Homo sapiens OX=9606 GN=FYN PE=1 SV=3	4	8	8	4	0	0	0	1	1	8	0	0	0	1	1	8	0	0	0	0	0	4	17.9	17.9	9.5	60.761	537	537;232;175;186	0	9.0975				By MS/MS	By MS/MS	By MS/MS	0	0	0	1.9	1.9	17.9
H0YNZ0;H9ZYI9;Q06547	H0YNZ0;H9ZYI9;Q06547	1;1;1	1;1;1	1;1;1	GA-binding protein subunit beta-1	GABPB1	tr|H0YNZ0|H0YNZ0_HUMAN GA-binding protein subunit beta-1 (Fragment) OS=Homo sapiens OX=9606 GN=GABPB1 PE=1 SV=1;tr|H9ZYI9|H9ZYI9_HUMAN GA binding protein transcription factor beta subunit 1 transcript variant gamma-2 OS=Homo sapiens OX=9606 GN=GABPB1 PE=1	3	1	1	1	0	1	0	1	1	0	0	1	0	1	1	0	0	1	0	1	1	0	15.7	15.7	15.7	9.5868	89	89;347;395	0.00090457	1.8243		By MS/MS		By MS/MS	By MS/MS		0	15.7	0	15.7	15.7	0
P28476	P28476	1	1	1	Gamma-aminobutyric acid receptor subunit rho-2	GABRR2	sp|P28476|GBRR2_HUMAN Gamma-aminobutyric acid receptor subunit rho-2 OS=Homo sapiens OX=9606 GN=GABRR2 PE=2 SV=5	1	1	1	1	1	1	0	1	1	0	1	1	0	1	1	0	1	1	0	1	1	0	3.4	3.4	3.4	54.15	465	465	1	-2	By MS/MS	By MS/MS		By MS/MS	By MS/MS		3.4	3.4	0	3.4	3.4	0
O14976;A0A087X1U9;D6RF16;D6RAQ7;D6RE78;D6RAW3;H0Y8H5	O14976;A0A087X1U9	4;2;1;1;1;1;1	4;2;1;1;1;1;1	4;2;1;1;1;1;1	Cyclin-G-associated kinase	GAK	sp|O14976|GAK_HUMAN Cyclin-G-associated kinase OS=Homo sapiens OX=9606 GN=GAK PE=1 SV=2;tr|A0A087X1U9|A0A087X1U9_HUMAN Cyclin-G-associated kinase OS=Homo sapiens OX=9606 GN=GAK PE=1 SV=1	7	4	4	4	1	1	1	1	1	4	1	1	1	1	1	4	1	1	1	1	1	4	4.7	4.7	4.7	143.19	1311	1311;416;49;75;118;138;467	0	76.779	By matching	By MS/MS	By matching	By MS/MS	By MS/MS	By MS/MS	1.4	1.4	1.4	1.4	1.4	4.7
P47211	P47211	1	1	1	Galanin receptor type 1	GALR1	sp|P47211|GALR1_HUMAN Galanin receptor type 1 OS=Homo sapiens OX=9606 GN=GALR1 PE=1 SV=3	1	1	1	1	0	0	1	0	0	1	0	0	1	0	0	1	0	0	1	0	0	1	2.3	2.3	2.3	38.952	349	349	1	-2			By MS/MS			By MS/MS	0	0	2.3	0	0	2.3
Q9NY12	Q9NY12	1	1	1	H/ACA ribonucleoprotein complex subunit 1	GAR1	sp|Q9NY12|GAR1_HUMAN H/ACA ribonucleoprotein complex subunit 1 OS=Homo sapiens OX=9606 GN=GAR1 PE=1 SV=1	1	1	1	1	0	0	1	0	0	1	0	0	1	0	0	1	0	0	1	0	0	1	6	6	6	22.348	217	217	0	3.16			By MS/MS			By MS/MS	0	0	6	0	0	6
Q92908	Q92908	2	2	2	Transcription factor GATA-6	GATA6	sp|Q92908|GATA6_HUMAN Transcription factor GATA-6 OS=Homo sapiens OX=9606 GN=GATA6 PE=1 SV=2	1	2	2	2	0	0	2	0	0	2	0	0	2	0	0	2	0	0	2	0	0	2	5	5	5	60.032	595	595	0	4.0128			By MS/MS			By MS/MS	0	0	5	0	0	5
Q8WUU5	Q8WUU5	1	1	1	GATA zinc finger domain-containing protein 1	GATAD1	sp|Q8WUU5|GATD1_HUMAN GATA zinc finger domain-containing protein 1 OS=Homo sapiens OX=9606 GN=GATAD1 PE=1 SV=1	1	1	1	1	0	0	1	0	0	0	0	0	1	0	0	0	0	0	1	0	0	0	6.7	6.7	6.7	28.69	269	269	0.0088258	0.98812			By MS/MS				0	0	6.7	0	0	0
Q04446	Q04446	1	1	1	1,4-alpha-glucan-branching enzyme	GBE1	sp|Q04446|GLGB_HUMAN 1,4-alpha-glucan-branching enzyme OS=Homo sapiens OX=9606 GN=GBE1 PE=1 SV=3	1	1	1	1	0	0	1	0	0	0	0	0	1	0	0	0	0	0	1	0	0	0	2.4	2.4	2.4	80.473	702	702	0	3.3215			By matching				0	0	2.4	0	0	0
H7C2Z6;H7BXD5;P28676	H7C2Z6;H7BXD5;P28676	1;1;1	1;1;1	1;1;1	Grancalcin	GCA	tr|H7C2Z6|H7C2Z6_HUMAN Grancalcin (Fragment) OS=Homo sapiens OX=9606 GN=GCA PE=1 SV=1;tr|H7BXD5|H7BXD5_HUMAN Grancalcin OS=Homo sapiens OX=9606 GN=GCA PE=1 SV=1;sp|P28676|GRAN_HUMAN Grancalcin OS=Homo sapiens OX=9606 GN=GCA PE=1 SV=2	3	1	1	1	0	0	1	0	0	1	0	0	1	0	0	1	0	0	1	0	0	1	8.2	8.2	8.2	16.712	146	146;198;217	0.00089485	1.7598			By MS/MS			By MS/MS	0	0	8.2	0	0	8.2
P48507	P48507	2	2	2	Glutamate--cysteine ligase regulatory subunit	GCLM	sp|P48507|GSH0_HUMAN Glutamate--cysteine ligase regulatory subunit OS=Homo sapiens OX=9606 GN=GCLM PE=1 SV=1	1	2	2	2	0	0	1	0	0	1	0	0	1	0	0	1	0	0	1	0	0	1	9.9	9.9	9.9	30.727	274	274	0.00047438	2.1495			By matching			By MS/MS	0	0	5.1	0	0	5.1
Q92616	Q92616	1	1	1	Translational activator GCN1	GCN1L1	sp|Q92616|GCN1_HUMAN eIF-2-alpha kinase activator GCN1 OS=Homo sapiens OX=9606 GN=GCN1 PE=1 SV=6	1	1	1	1	0	0	1	0	0	1	0	0	1	0	0	1	0	0	1	0	0	1	0.7	0.7	0.7	292.75	2671	2671	1	-2			By matching			By matching	0	0	0.7	0	0	0.7
P31150;V9GYJ7;V9GYF8;G5E9U5;Q5SX90;Q5SX86	P31150	6;1;1;1;1;1	1;0;0;0;0;0	1;0;0;0;0;0	Rab GDP dissociation inhibitor alpha	GDI1	sp|P31150|GDIA_HUMAN Rab GDP dissociation inhibitor alpha OS=Homo sapiens OX=9606 GN=GDI1 PE=1 SV=2	6	6	1	1	2	1	2	2	1	3	1	1	0	1	1	0	1	1	0	1	1	0	16.6	2.5	2.5	50.582	447	447;125;130;147;148;155	0.0029724	1.4077	By MS/MS	By MS/MS	By matching	By MS/MS	By MS/MS	By matching	4.7	2.5	6.7	4.7	2.5	7.2
H0YEF5;Q8WTR4	H0YEF5;Q8WTR4	1;1	1;1	1;1	Glycerophosphodiester phosphodiesterase domain-containing protein 5	GDPD5	tr|H0YEF5|H0YEF5_HUMAN Glycerophosphodiester phosphodiesterase domain-containing protein 5 (Fragment) OS=Homo sapiens OX=9606 GN=GDPD5 PE=1 SV=8;sp|Q8WTR4|GDPD5_HUMAN Glycerophosphodiester phosphodiesterase domain-containing protein 5 OS=Homo sapiens OX=96	2	1	1	1	0	0	0	0	0	1	0	0	0	0	0	1	0	0	0	0	0	1	8.6	8.6	8.6	19.818	175	175;605	1	-2						By MS/MS	0	0	0	0	0	8.6
G5EA29;H0YEL0;A0A3B3IU42;H0YCF4;H0YDP6;O14893	G5EA29;H0YEL0;A0A3B3IU42;H0YCF4;H0YDP6;O14893	2;2;2;1;1;1	2;2;2;1;1;1	2;2;2;1;1;1	Gem-associated protein 2	GEMIN2	tr|G5EA29|G5EA29_HUMAN Gem-associated protein 2 OS=Homo sapiens OX=9606 GN=GEMIN2 PE=1 SV=2;tr|H0YEL0|H0YEL0_HUMAN Gem-associated protein 2 (Fragment) OS=Homo sapiens OX=9606 GN=GEMIN2 PE=1 SV=2;tr|A0A3B3IU42|A0A3B3IU42_HUMAN Gem-associated protein 2 OS=Ho	6	2	2	2	2	2	1	2	2	0	2	2	1	2	2	0	2	2	1	2	2	0	25.4	25.4	25.4	15.665	138	138;214;275;38;194;280	0	3.1359	By MS/MS	By MS/MS	By MS/MS	By MS/MS	By MS/MS		25.4	25.4	10.9	25.4	25.4	0
Q8WXD5;B9A037;B8ZZ85	Q8WXD5;B9A037;B8ZZ85	7;4;4	7;4;4	7;4;4	Gem-associated protein 6	GEMIN6	sp|Q8WXD5|GEMI6_HUMAN Gem-associated protein 6 OS=Homo sapiens OX=9606 GN=GEMIN6 PE=1 SV=1;tr|B9A037|B9A037_HUMAN Gem-associated protein 6 OS=Homo sapiens OX=9606 GN=GEMIN6 PE=1 SV=1;tr|B8ZZ85|B8ZZ85_HUMAN Gem (Nuclear organelle) associated protein 6, isof	3	7	7	7	1	1	3	1	2	4	1	1	3	1	2	4	1	1	3	1	2	4	30.5	30.5	30.5	18.824	167	167;69;111	0	8.5673	By MS/MS	By MS/MS	By MS/MS	By matching	By MS/MS	By MS/MS	7.8	7.8	16.8	7.8	15	29.9
Q9H840	Q9H840	2	2	2	Gem-associated protein 7	GEMIN7	sp|Q9H840|GEMI7_HUMAN Gem-associated protein 7 OS=Homo sapiens OX=9606 GN=GEMIN7 PE=1 SV=1	1	2	2	2	0	1	1	0	1	1	0	1	1	0	1	1	0	1	1	0	1	1	22.9	22.9	22.9	14.536	131	131	0	2.432		By matching	By matching		By MS/MS	By MS/MS	0	10.7	12.2	0	10.7	12.2
B4DIR1;K7ELP4;K7EJU1;K7EKH9;A0A1W2PRT3;A0A1X7SCE1;A0A1X7SBR3;A0A1W2PR46;P14136	B4DIR1;K7ELP4;K7EJU1;K7EKH9;A0A1W2PRT3;A0A1X7SCE1;A0A1X7SBR3;A0A1W2PR46;P14136	1;1;1;1;1;1;1;1;1	1;1;1;1;1;1;1;1;1	1;1;1;1;1;1;1;1;1	Glial fibrillary acidic protein	GFAP	tr|B4DIR1|B4DIR1_HUMAN Glial fibrillary acidic protein OS=Homo sapiens OX=9606 GN=GFAP PE=1 SV=1;tr|K7ELP4|K7ELP4_HUMAN Glial fibrillary acidic protein (Fragment) OS=Homo sapiens OX=9606 GN=GFAP PE=1 SV=1;tr|K7EJU1|K7EJU1_HUMAN Glial fibrillary acidic prot	9	1	1	1	0	0	0	0	0	0	0	0	0	0	0	0	0	0	0	0	0	0	8.4	8.4	8.4	20.547	179	179;189;248;261;326;334;472;505;432	0.0081112	1.0242							0	0	0	0	0	0
F8WAU4;C9IZ01;Q96RP9	F8WAU4;C9IZ01;Q96RP9	2;2;2	2;2;2	2;2;2	Elongation factor G, mitochondrial	GFM1	tr|F8WAU4|F8WAU4_HUMAN Elongation factor G, mitochondrial OS=Homo sapiens OX=9606 GN=GFM1 PE=1 SV=1;tr|C9IZ01|C9IZ01_HUMAN Elongation factor G, mitochondrial OS=Homo sapiens OX=9606 GN=GFM1 PE=1 SV=1;sp|Q96RP9|EFGM_HUMAN Elongation factor G, mitochondrial	3	2	2	2	0	0	1	0	0	0	0	0	1	0	0	0	0	0	1	0	0	0	6	6	6	50.911	453	453;591;751	0.0059761	1.138			By MS/MS				0	0	2.9	0	0	0
Q06210;A0A6I8PRN4;A0A6I8PTT9;O94808;A0A6I8PRT6;E5RJP4	Q06210;A0A6I8PRN4;A0A6I8PTT9	16;14;14;2;1;1	16;14;14;2;1;1	16;14;14;2;1;1	Glutamine--fructose-6-phosphate aminotransferase [isomerizing] 1	GFPT1	sp|Q06210|GFPT1_HUMAN Glutamine--fructose-6-phosphate aminotransferase [isomerizing] 1 OS=Homo sapiens OX=9606 GN=GFPT1 PE=1 SV=3;tr|A0A6I8PRN4|A0A6I8PRN4_HUMAN Glutamine--fructose-6-phosphate transaminase (isomerizing) OS=Homo sapiens OX=9606 GN=GFPT1 PE=	6	16	16	16	0	0	7	0	0	10	0	0	7	0	0	10	0	0	7	0	0	10	32.9	32.9	32.9	78.806	699	699;609;625;682;57;216	0	84.416			By MS/MS			By MS/MS	0	0	13.9	0	0	19.6
Q9NWU2	Q9NWU2	1	1	1	Glucose-induced degradation protein 8 homolog	GID8	sp|Q9NWU2|GID8_HUMAN Glucose-induced degradation protein 8 homolog OS=Homo sapiens OX=9606 GN=GID8 PE=1 SV=1	1	1	1	1	0	0	1	0	0	0	0	0	1	0	0	0	0	0	1	0	0	0	5.7	5.7	5.7	26.748	228	228	0.00047259	2.1338			By MS/MS				0	0	5.7	0	0	0
O14908	O14908	2	2	2	PDZ domain-containing protein GIPC1	GIPC1	sp|O14908|GIPC1_HUMAN PDZ domain-containing protein GIPC1 OS=Homo sapiens OX=9606 GN=GIPC1 PE=1 SV=2	1	2	2	2	0	0	1	0	0	2	0	0	1	0	0	2	0	0	1	0	0	2	8.4	8.4	8.4	36.049	333	333	0.008105	1.0234			By MS/MS			By MS/MS	0	0	3.9	0	0	8.4
A0A1W2PPE1;P23378	A0A1W2PPE1;P23378	1;1	1;1	1;1	Glycine dehydrogenase (decarboxylating), mitochondrial	GLDC	tr|A0A1W2PPE1|A0A1W2PPE1_HUMAN Glycine dehydrogenase (decarboxylating), mitochondrial (Fragment) OS=Homo sapiens OX=9606 GN=GLDC PE=1 SV=1;sp|P23378|GCSP_HUMAN Glycine dehydrogenase (decarboxylating), mitochondrial OS=Homo sapiens OX=9606 GN=GLDC PE=1 SV=2	2	1	1	1	0	0	1	0	0	0	0	0	1	0	0	0	0	0	1	0	0	0	11	11	11	17.85	164	164;1020	0.0045549	1.2836			By matching				0	0	11	0	0	0
Q92990	Q92990	1	1	1	Glomulin	GLMN	sp|Q92990|GLMN_HUMAN Glomulin OS=Homo sapiens OX=9606 GN=GLMN PE=1 SV=2	1	1	1	1	1	1	1	1	1	1	1	1	1	1	1	1	1	1	1	1	1	1	1.9	1.9	1.9	68.207	594	594	0	6.5917	By MS/MS	By MS/MS	By MS/MS	By MS/MS	By MS/MS	By MS/MS	1.9	1.9	1.9	1.9	1.9	1.9
F5GXQ5;Q5SZD4	F5GXQ5;Q5SZD4	1;1	1;1	1;1	Glycine N-acyltransferase-like protein 3	GLYATL3	tr|F5GXQ5|F5GXQ5_HUMAN Glycine N-acyltransferase-like protein (Fragment) OS=Homo sapiens OX=9606 GN=GLYATL3 PE=1 SV=1;sp|Q5SZD4|GLYL3_HUMAN Glycine N-acyltransferase-like protein 3 OS=Homo sapiens OX=9606 GN=GLYATL3 PE=2 SV=3	2	1	1	1	0	0	0	0	0	0	0	0	0	0	0	0	0	0	0	0	0	0	7.1	7.1	7.1	17.964	156	156;288	1	-2							0	0	0	0	0	0
O60547	O60547	1	1	1	GDP-mannose 4,6 dehydratase	GMDS	sp|O60547|GMDS_HUMAN GDP-mannose 4,6 dehydratase OS=Homo sapiens OX=9606 GN=GMDS PE=1 SV=1	1	1	1	1	0	0	0	0	0	1	0	0	0	0	0	1	0	0	0	0	0	1	5.1	5.1	5.1	41.949	372	372	0	3.086						By MS/MS	0	0	0	0	0	5.1
Q9Y692	Q9Y692	4	2	2	Glucocorticoid modulatory element-binding protein 1	GMEB1	sp|Q9Y692|GMEB1_HUMAN Glucocorticoid modulatory element-binding protein 1 OS=Homo sapiens OX=9606 GN=GMEB1 PE=1 SV=2	1	4	2	2	0	0	2	1	0	4	0	0	1	1	0	2	0	0	1	1	0	2	7.2	5.4	5.4	62.59	573	573	0	81.124			By MS/MS	By matching		By MS/MS	0	0	3.7	2.1	0	7.2
Q5JTV1;Q9UKD1	Q5JTV1;Q9UKD1	5;5	5;5	3;3	Glucocorticoid modulatory element-binding protein 2	GMEB2	tr|Q5JTV1|Q5JTV1_HUMAN Glucocorticoid modulatory element binding protein 2, isoform CRA_a OS=Homo sapiens OX=9606 GN=GMEB2 PE=1 SV=1;sp|Q9UKD1|GMEB2_HUMAN Glucocorticoid modulatory element-binding protein 2 OS=Homo sapiens OX=9606 GN=GMEB2 PE=1 SV=1	2	5	5	3	0	0	2	0	0	4	0	0	2	0	0	4	0	0	1	0	0	2	9.6	9.6	7.5	51.233	479	479;530	0.00048426	2.3695			By MS/MS			By MS/MS	0	0	3.8	0	0	5.4
G3V3X4;G3V4P8;P60983	G3V3X4;G3V4P8;P60983	1;1;1	1;1;1	1;1;1	Glia maturation factor beta	GMFB	tr|G3V3X4|G3V3X4_HUMAN Glia maturation factor beta OS=Homo sapiens OX=9606 GN=GMFB PE=1 SV=1;tr|G3V4P8|G3V4P8_HUMAN Glia maturation factor beta (Fragment) OS=Homo sapiens OX=9606 GN=GMFB PE=1 SV=1;sp|P60983|GMFB_HUMAN Glia maturation factor beta OS=Homo sa	3	1	1	1	0	0	0	0	0	0	0	0	0	0	0	0	0	0	0	0	0	0	47.4	47.4	47.4	4.5232	38	38;150;142	0	2.7951							0	0	0	0	0	0
P49915	P49915	12	12	12	GMP synthase [glutamine-hydrolyzing]	GMPS	sp|P49915|GUAA_HUMAN GMP synthase [glutamine-hydrolyzing] OS=Homo sapiens OX=9606 GN=GMPS PE=1 SV=1	1	12	12	12	0	0	3	0	0	5	0	0	3	0	0	5	0	0	3	0	0	5	30.2	30.2	30.2	76.715	693	693	0	86.767			By MS/MS			By MS/MS	0	0	7.6	0	0	15.3
Q5JWF2;P63092;A0A1W2PRJ7;A0A590UJB0;A0A7I2V5R6;Q5JWE9;H0Y7E8;A0A0A0MR13;A0A590UJ58;B0AZR9;A0A590UJF0;A0A590UJR6;A0A590UJS2;A0A590UJQ2;A0A590UJI6;A0A1W2PQK2;A0A590UKB4;A0A590UJJ0;A0A590UJG5;A0A590UJQ9;A0A590UJ22;A0A1W2PRE1;A0A1W2PS82;Q5JWD1;A0A590UKA4;A0A590UK28;A0A087WZE5;A2A2R6;A0A6Q8PGR1;A0A087WTB6;S4R3E3;P38405;A0A590UJY8;A8MTJ3;P04899;P19087;P09471;P08754;P63096;P11488;A0A3B3IUA8	Q5JWF2;P63092;A0A1W2PRJ7;A0A590UJB0;A0A7I2V5R6;Q5JWE9;H0Y7E8;A0A0A0MR13;A0A590UJ58;B0AZR9;A0A590UJF0;A0A590UJR6;A0A590UJS2;A0A590UJQ2;A0A590UJI6;A0A1W2PQK2;A0A590UKB4;A0A590UJJ0;A0A590UJG5;A0A590UJQ9;A0A590UJ22;A0A1W2PRE1;A0A1W2PS82;Q5JWD1;A0A590UKA4;A0A590UK28;A0A087WZE5;A2A2R6;A0A6Q8PGR1;A0A087WTB6;S4R3E3;P38405;A0A590UJY8;A8MTJ3;P04899;P19087;P09471;P08754;P63096;P11488;A0A3B3IUA8	2;2;1;1;1;1;1;1;1;1;1;1;1;1;1;1;1;1;1;1;1;1;1;1;1;1;1;1;1;1;1;1;1;1;1;1;1;1;1;1;1	2;2;1;1;1;1;1;1;1;1;1;1;1;1;1;1;1;1;1;1;1;1;1;1;1;1;1;1;1;1;1;1;1;1;1;1;1;1;1;1;1	2;2;1;1;1;1;1;1;1;1;1;1;1;1;1;1;1;1;1;1;1;1;1;1;1;1;1;1;1;1;1;1;1;1;1;1;1;1;1;1;1	Guanine nucleotide-binding protein G(s) subunit alpha isoforms XLas;Guanine nucleotide-binding protein G(s) subunit alpha isoforms short;Guanine nucleotide-binding protein G(olf) subunit alpha;Guanine nucleotide-binding protein G(t) subunit alpha-3;Guanine nucleotide-binding protein G(i) subunit alpha-2;Guanine nucleotide-binding protein G(t) subunit alpha-2;Guanine nucleotide-binding protein G(o…	GNAS;GNAT2;GNAO1;GNAL;GNAT3;GNAI2;GNAI3;GNAI1;GNAT1	sp|Q5JWF2|GNAS1_HUMAN Guanine nucleotide-binding protein G(s) subunit alpha isoforms XLas OS=Homo sapiens OX=9606 GN=GNAS PE=1 SV=2;sp|P63092|GNAS2_HUMAN Guanine nucleotide-binding protein G(s) subunit alpha isoforms short OS=Homo sapiens OX=9606 GN=GNAS P	41	2	2	2	0	0	1	0	0	1	0	0	1	0	0	1	0	0	1	0	0	1	3.1	3.1	3.1	111.02	1037	1037;394;104;273;820;812;730;362;351;335;320;233;165;180;228;61;220;206;205;221;159;54;146;87;136;127;123;72;110;84;160;381;136;354;355;354;354;354;354;350;148	0.0025663	1.4313			By MS/MS			By MS/MS	0	0	1.1	0	0	1.1
Q9BYB4	Q9BYB4	2	2	2	Guanine nucleotide-binding protein subunit beta-like protein 1	GNB1L	sp|Q9BYB4|GNB1L_HUMAN Guanine nucleotide-binding protein subunit beta-like protein 1 OS=Homo sapiens OX=9606 GN=GNB1L PE=1 SV=2	1	2	2	2	0	0	2	0	0	2	0	0	2	0	0	2	0	0	2	0	0	2	9.2	9.2	9.2	35.618	327	327	0.00045475	1.8645			By MS/MS			By MS/MS	0	0	9.2	0	0	9.2
C9JZN1;C9JIS1;C9JXA5;P62879;C9JD14;H7C5J5;A0A6Q8PFW8;A0A6Q8PFE0;A0A6Q8PFV8;A0A7I2S2S9;Q9HAV0	C9JZN1;C9JIS1;C9JXA5;P62879	3;3;3;3;1;1;1;1;1;1;1	2;2;2;2;1;1;1;1;1;1;1	2;2;2;2;1;1;1;1;1;1;1	Guanine nucleotide-binding protein G(I)/G(S)/G(T) subunit beta-2	GNB2	tr|C9JZN1|C9JZN1_HUMAN Guanine nucleotide-binding protein G(I)/G(S)/G(T) subunit beta-2 (Fragment) OS=Homo sapiens OX=9606 GN=GNB2 PE=1 SV=1;tr|C9JIS1|C9JIS1_HUMAN Guanine nucleotide-binding protein G(I)/G(S)/G(T) subunit beta-2 (Fragment) OS=Homo sapiens	11	3	2	2	0	0	1	0	1	1	0	0	1	0	1	1	0	0	1	0	1	1	34.2	22.4	22.4	17.032	152	152;232;251;340;79;242;245;306;322;327;340	0	21.478			By MS/MS		By matching	By MS/MS	0	0	9.2	0	13.2	13.2
P63244;J3KPE3;D6RAC2;D6REE5;D6RHH4;D6R9L0;H0Y8W2;H0YAM7;D6R9Z1;H0YAF8;D6RFX4;D6RBD0;H0Y8R5;D6RFZ9;E9PD14;D6RAU2;D6RF23;D6RGK8;D6R909;D6RHJ5;H0Y9P0;D6RDI0	P63244;J3KPE3;D6RAC2;D6REE5;D6RHH4;D6R9L0;H0Y8W2;H0YAM7;D6R9Z1;H0YAF8;D6RFX4;D6RBD0;H0Y8R5	13;11;11;10;10;9;9;9;9;8;8;7;7;5;5;5;4;3;3;2;2;1	13;11;11;10;10;9;9;9;9;8;8;7;7;5;5;5;4;3;3;2;2;1	13;11;11;10;10;9;9;9;9;8;8;7;7;5;5;5;4;3;3;2;2;1	Guanine nucleotide-binding protein subunit beta-2-like 1;Guanine nucleotide-binding protein subunit beta-2-like 1, N-terminally processed	GNB2L1	sp|P63244|RACK1_HUMAN Receptor of activated protein C kinase 1 OS=Homo sapiens OX=9606 GN=RACK1 PE=1 SV=3;tr|J3KPE3|J3KPE3_HUMAN Receptor of-activated protein C kinase 1 OS=Homo sapiens OX=9606 GN=RACK1 PE=1 SV=1;tr|D6RAC2|D6RAC2_HUMAN Receptor of-activate	22	13	13	13	2	0	7	1	1	8	2	0	7	1	1	8	2	0	7	1	1	8	49.5	49.5	49.5	35.076	317	317;273;269;321;233;300;274;247;236;198;194;160;138;197;153;147;101;71;116;86;83;39	0	41.73	By matching		By MS/MS	By MS/MS	By MS/MS	By MS/MS	8.5	0	24.6	3.5	5	36.3
G3V415	G3V415	1	1	1	Guanine nucleotide-binding protein subunit gamma	GNG2	tr|G3V415|G3V415_HUMAN Guanine nucleotide binding protein (G protein), gamma 2, isoform CRA_b OS=Homo sapiens OX=9606 GN=GNG2 PE=1 SV=1	1	1	1	1	0	0	1	0	0	1	0	0	1	0	0	1	0	0	1	0	0	1	26.2	26.2	26.2	6.8579	61	61	1	-2			By MS/MS			By matching	0	0	26.2	0	0	26.2
Q9BVP2	Q9BVP2	1	1	1	Guanine nucleotide-binding protein-like 3	GNL3	sp|Q9BVP2|GNL3_HUMAN Guanine nucleotide-binding protein-like 3 OS=Homo sapiens OX=9606 GN=GNL3 PE=1 SV=2	1	1	1	1	0	0	0	0	0	0	0	0	0	0	0	0	0	0	0	0	0	0	3.8	3.8	3.8	61.992	549	549	0	3.1421							0	0	0	0	0	0
Q9H4A6	Q9H4A6	1	1	1	Golgi phosphoprotein 3	GOLPH3	sp|Q9H4A6|GOLP3_HUMAN Golgi phosphoprotein 3 OS=Homo sapiens OX=9606 GN=GOLPH3 PE=1 SV=1	1	1	1	1	0	0	0	0	0	1	0	0	0	0	0	1	0	0	0	0	0	1	5.4	5.4	5.4	33.81	298	298	0.00045455	1.8616						By MS/MS	0	0	0	0	0	5.4
P17174	P17174	2	2	2	Aspartate aminotransferase, cytoplasmic	GOT1	sp|P17174|AATC_HUMAN Aspartate aminotransferase, cytoplasmic OS=Homo sapiens OX=9606 GN=GOT1 PE=1 SV=3	1	2	2	2	0	0	1	0	1	2	0	0	1	0	1	2	0	0	1	0	1	2	9.9	9.9	9.9	46.247	413	413	0	14.9			By MS/MS		By MS/MS	By MS/MS	0	0	4.8	0	5.1	9.9
P00505	P00505	1	1	1	Aspartate aminotransferase, mitochondrial	GOT2	sp|P00505|AATM_HUMAN Aspartate aminotransferase, mitochondrial OS=Homo sapiens OX=9606 GN=GOT2 PE=1 SV=3	1	1	1	1	0	0	1	1	0	0	0	0	1	1	0	0	0	0	1	1	0	0	4	4	4	47.517	430	430	0.0088224	0.98588			By MS/MS	By matching			0	0	4	4	0	0
A0A087WW86;A0A0A0MRI1;Q8IXQ4	A0A087WW86;A0A0A0MRI1;Q8IXQ4	2;1;1	2;1;1	2;1;1	GPALPP motifs-containing protein 1	GPALPP1	tr|A0A087WW86|A0A087WW86_HUMAN GPALPP motifs-containing protein 1 OS=Homo sapiens OX=9606 GN=GPALPP1 PE=1 SV=1;tr|A0A0A0MRI1|A0A0A0MRI1_HUMAN GPALPP motifs-containing protein 1 OS=Homo sapiens OX=9606 GN=GPALPP1 PE=1 SV=1;sp|Q8IXQ4|GPAM1_HUMAN GPALPP motif	3	2	2	2	0	0	2	0	0	1	0	0	2	0	0	1	0	0	2	0	0	1	26	26	26	10.737	100	100;338;340	0.00045809	1.907			By MS/MS			By matching	0	0	26	0	0	14
Q9NW75	Q9NW75	1	1	1	G patch domain-containing protein 2	GPATCH2	sp|Q9NW75|GPTC2_HUMAN G patch domain-containing protein 2 OS=Homo sapiens OX=9606 GN=GPATCH2 PE=1 SV=1	1	1	1	1	0	0	0	1	0	0	0	0	0	1	0	0	0	0	0	1	0	0	3.6	3.6	3.6	58.943	528	528	0.0045267	1.2578				By matching			0	0	0	3.6	0	0
D4PHA4;Q86WP2	D4PHA4;Q86WP2	2;2	2;2	2;2	Vasculin	GPBP1	tr|D4PHA4|D4PHA4_HUMAN GC-rich promoter binding protein 1, isoform CRA_c OS=Homo sapiens OX=9606 GN=GPBP1 PE=1 SV=1;sp|Q86WP2|GPBP1_HUMAN Vasculin OS=Homo sapiens OX=9606 GN=GPBP1 PE=1 SV=1	2	2	2	2	0	0	2	0	0	2	0	0	2	0	0	2	0	0	2	0	0	2	7.9	7.9	7.9	55.525	493	493;473	0	19.104			By MS/MS			By MS/MS	0	0	7.9	0	0	7.9
P35052;H7C410;H7C024;H7BZE9;C9J4Y6;H7BZL4	P35052;H7C410;H7C024	18;14;12;6;5;3	18;14;12;6;5;3	18;14;12;6;5;3	Glypican-1;Secreted glypican-1	GPC1	sp|P35052|GPC1_HUMAN Glypican-1 OS=Homo sapiens OX=9606 GN=GPC1 PE=1 SV=2;tr|H7C410|H7C410_HUMAN Glypican-1 OS=Homo sapiens OX=9606 GN=GPC1 PE=1 SV=2;tr|H7C024|H7C024_HUMAN Glypican-1 (Fragment) OS=Homo sapiens OX=9606 GN=GPC1 PE=1 SV=2	6	18	18	18	16	3	1	1	13	0	16	3	1	1	13	0	16	3	1	1	13	0	32.4	32.4	32.4	61.68	558	558;486;294;162;156;281	0	49.119	By MS/MS	By MS/MS	By matching	By matching	By MS/MS		30.1	7.9	3.2	2.2	22.8	0
A0A0J9YXG7;Q8N158	A0A0J9YXG7;Q8N158	2;2	2;2	2;2	Glypican-2;Secreted glypican-2	GPC2	tr|A0A0J9YXG7|A0A0J9YXG7_HUMAN Glypican-2 OS=Homo sapiens OX=9606 GN=GPC2 PE=1 SV=1;sp|Q8N158|GPC2_HUMAN Glypican-2 OS=Homo sapiens OX=9606 GN=GPC2 PE=2 SV=1	2	2	2	2	0	0	0	0	0	0	0	0	0	0	0	0	0	0	0	0	0	0	20.9	20.9	20.9	14.358	134	134;579	0.0045361	1.2712							0	0	0	0	0	0
P51654;H0Y3U6	P51654;H0Y3U6	4;3	4;3	4;3	Glypican-3;Secreted glypican-3	GPC3	sp|P51654|GPC3_HUMAN Glypican-3 OS=Homo sapiens OX=9606 GN=GPC3 PE=1 SV=1;tr|H0Y3U6|H0Y3U6_HUMAN Glypican-3 (Fragment) OS=Homo sapiens OX=9606 GN=GPC3 PE=1 SV=1	2	4	4	4	2	2	0	0	4	0	2	2	0	0	4	0	2	2	0	0	4	0	7.2	7.2	7.2	65.562	580	580;256	0	4.1287	By MS/MS	By MS/MS			By MS/MS		2.8	2.8	0	0	7.2	0
O75487	O75487	11	11	11	Glypican-4;Secreted glypican-4	GPC4	sp|O75487|GPC4_HUMAN Glypican-4 OS=Homo sapiens OX=9606 GN=GPC4 PE=1 SV=4	1	11	11	11	9	1	0	1	10	0	9	1	0	1	10	0	9	1	0	1	10	0	26.1	26.1	26.1	62.411	556	556	0	25.105	By MS/MS	By MS/MS		By MS/MS	By MS/MS		21.9	1.8	0	1.8	22.8	0
Q9Y625;A0A087WT82	Q9Y625	3;1	3;1	3;1	Glypican-6;Secreted glypican-6	GPC6	sp|Q9Y625|GPC6_HUMAN Glypican-6 OS=Homo sapiens OX=9606 GN=GPC6 PE=1 SV=1	2	3	3	3	3	1	0	0	3	0	3	1	0	0	3	0	3	1	0	0	3	0	8.6	8.6	8.6	62.735	555	555;263	0	7.0397	By MS/MS	By MS/MS			By MS/MS		8.6	3.2	0	0	8.6	0
P06744;A0A0J9YXP8;A0A2R8Y6C7;A0A2U3TZU2;A0A0J9YX90;A0A0J9YYH3;K7EQ48;K7ENA0;K7EPY4;K7EP41;A0A0J9YXM3;K7ERC6;Q3ZBD7;CON__Q3ZBD7	P06744;A0A0J9YXP8;A0A2R8Y6C7;A0A2U3TZU2;A0A0J9YX90;A0A0J9YYH3;K7EQ48	5;4;4;4;3;3;3;2;2;1;1;1;1;1	5;4;4;4;3;3;3;2;2;1;1;1;1;1	5;4;4;4;3;3;3;2;2;1;1;1;1;1	Glucose-6-phosphate isomerase	GPI	sp|P06744|G6PI_HUMAN Glucose-6-phosphate isomerase OS=Homo sapiens OX=9606 GN=GPI PE=1 SV=4;tr|A0A0J9YXP8|A0A0J9YXP8_HUMAN Glucose-6-phosphate isomerase (Fragment) OS=Homo sapiens OX=9606 GN=GPI PE=1 SV=1;tr|A0A2R8Y6C7|A0A2R8Y6C7_HUMAN Glucose-6-phosphate	14	5	5	5	0	0	4	0	0	1	0	0	4	0	0	1	0	0	4	0	0	1	15.6	15.6	15.6	63.146	558	558;268;316;597;279;283;447;162;166;159;161;170;557;557	0	13.077			By MS/MS			By MS/MS	0	0	12.9	0	0	3
Q8IZF6	Q8IZF6	1	1	1	Probable G-protein coupled receptor 112	GPR112	sp|Q8IZF6|AGRG4_HUMAN Adhesion G-protein coupled receptor G4 OS=Homo sapiens OX=9606 GN=ADGRG4 PE=2 SV=2	1	1	1	1	0	0	1	0	0	0	0	0	1	0	0	0	0	0	1	0	0	0	0.5	0.5	0.5	333.36	3080	3080	1	-2			By MS/MS				0	0	0.5	0	0	0
Q86SQ6	Q86SQ6	1	1	1	Probable G-protein coupled receptor 123	GPR123	sp|Q86SQ6|AGRA1_HUMAN Adhesion G protein-coupled receptor A1 OS=Homo sapiens OX=9606 GN=ADGRA1 PE=2 SV=3	1	1	1	1	0	0	0	0	0	1	0	0	0	0	0	1	0	0	0	0	0	1	2	2	2	60.884	560	560	1	-2						By MS/MS	0	0	0	0	0	2
A0A3B3IUC3;Q5T848	A0A3B3IUC3;Q5T848	1;1	1;1	1;1	Probable G-protein coupled receptor 158	GPR158	tr|A0A3B3IUC3|A0A3B3IUC3_HUMAN Probable G-protein-coupled receptor 158 OS=Homo sapiens OX=9606 GN=GPR158 PE=1 SV=1;sp|Q5T848|GP158_HUMAN Probable G-protein coupled receptor 158 OS=Homo sapiens OX=9606 GN=GPR158 PE=1 SV=1	2	1	1	1	1	1	0	0	1	0	1	1	0	0	1	0	1	1	0	0	1	0	1.8	1.8	1.8	127.27	1136	1136;1215	0.002172	1.5352	By MS/MS	By MS/MS			By MS/MS		1.8	1.8	0	0	1.8	0
J3QQX0;C9JFE4;A0A096LP07;A0A096LPJ3;A8K070;Q13098	J3QQX0;C9JFE4;A0A096LP07;A0A096LPJ3;A8K070;Q13098	1;1;1;1;1;1	1;1;1;1;1;1	1;1;1;1;1;1	COP9 signalosome complex subunit 1	GPS1	tr|J3QQX0|J3QQX0_HUMAN COP9 signalosome complex subunit 1 (Fragment) OS=Homo sapiens OX=9606 GN=GPS1 PE=1 SV=1;tr|C9JFE4|C9JFE4_HUMAN COP9 signalosome complex subunit 1 OS=Homo sapiens OX=9606 GN=GPS1 PE=1 SV=2;tr|A0A096LP07|A0A096LP07_HUMAN COP9 signaloso	6	1	1	1	0	0	1	0	0	0	0	0	1	0	0	0	0	0	1	0	0	0	20.3	20.3	20.3	8.7087	79	79;471;486;490;526;491	0.0045342	1.2669			By MS/MS				0	0	20.3	0	0	0
A0A2R8Y6B6;P07203	A0A2R8Y6B6;P07203	1;1	1;1	1;1	Glutathione peroxidase 1	GPX1	tr|A0A2R8Y6B6|A0A2R8Y6B6_HUMAN Glutathione peroxidase 1 OS=Homo sapiens OX=9606 GN=GPX1 PE=1 SV=1;sp|P07203|GPX1_HUMAN Glutathione peroxidase 1 OS=Homo sapiens OX=9606 GN=GPX1 PE=1 SV=4	2	1	1	1	0	0	1	0	0	1	0	0	1	0	0	1	0	0	1	0	0	1	7.6	7.6	7.6	16.914	157	157;203	0.00045579	1.8741			By MS/MS			By MS/MS	0	0	7.6	0	0	7.6
Q6IC98	Q6IC98	1	1	1	GRAM domain-containing protein 4	GRAMD4	sp|Q6IC98|GRAM4_HUMAN GRAM domain-containing protein 4 OS=Homo sapiens OX=9606 GN=GRAMD4 PE=1 SV=1	1	1	1	1	1	1	0	1	1	0	1	1	0	1	1	0	1	1	0	1	1	0	2.1	2.1	2.1	66.407	578	578	1	-2	By MS/MS	By matching		By matching	By matching		2.1	2.1	0	2.1	2.1	0
F8W7L6;P42262	F8W7L6;P42262	1;1	1;1	1;1	Glutamate receptor 2	GRIA2	tr|F8W7L6|F8W7L6_HUMAN Glutamate receptor OS=Homo sapiens OX=9606 GN=GRIA2 PE=1 SV=1;sp|P42262|GRIA2_HUMAN Glutamate receptor 2 OS=Homo sapiens OX=9606 GN=GRIA2 PE=1 SV=3	2	1	1	1	1	1	0	1	1	0	1	1	0	1	1	0	1	1	0	1	1	0	2.1	2.1	2.1	82.108	730	730;883	1	-2	By MS/MS	By MS/MS		By MS/MS	By matching		2.1	2.1	0	2.1	2.1	0
C9J5F6;C9JNS8;A4D2P6	C9J5F6;C9JNS8;A4D2P6	1;1;1	1;1;1	1;1;1	Delphilin	GRID2IP	tr|C9J5F6|C9J5F6_HUMAN Delphilin OS=Homo sapiens OX=9606 GN=GRID2IP PE=1 SV=1;tr|C9JNS8|C9JNS8_HUMAN Delphilin OS=Homo sapiens OX=9606 GN=GRID2IP PE=1 SV=1;sp|A4D2P6|GRD2I_HUMAN Delphilin OS=Homo sapiens OX=9606 GN=GRID2IP PE=3 SV=2	3	1	1	1	0	0	0	0	0	0	0	0	0	0	0	0	0	0	0	0	0	0	1.1	1.1	1.1	111.93	1020	1020;1027;1211	1	-2							0	0	0	0	0	0
Q8TCU5	Q8TCU5	1	1	1	Glutamate receptor ionotropic, NMDA 3A	GRIN3A	sp|Q8TCU5|NMD3A_HUMAN Glutamate receptor ionotropic, NMDA 3A OS=Homo sapiens OX=9606 GN=GRIN3A PE=1 SV=2	1	1	1	1	0	0	0	0	0	0	0	0	0	0	0	0	0	0	0	0	0	0	2.6	2.6	2.6	125.46	1115	1115	0.0029711	1.405							0	0	0	0	0	0
O15303	O15303	1	1	1	Metabotropic glutamate receptor 6	GRM6	sp|O15303|GRM6_HUMAN Metabotropic glutamate receptor 6 OS=Homo sapiens OX=9606 GN=GRM6 PE=1 SV=2	1	1	1	1	1	1	0	1	1	0	1	1	0	1	1	0	1	1	0	1	1	0	1.7	1.7	1.7	95.467	877	877	1	-2	By MS/MS	By MS/MS		By MS/MS	By MS/MS		1.7	1.7	0	1.7	1.7	0
A0A0U1RQL8;Q5T0I0;A0A0A0MS51;A0A0A0MT01;Q3SX14;CON__Q3SX14;P06396	A0A0U1RQL8;Q5T0I0;A0A0A0MS51;A0A0A0MT01;Q3SX14;CON__Q3SX14;P06396	2;2;2;2;2;2;2	2;2;2;2;2;2;2	2;2;2;2;2;2;2	Gelsolin	GSN	tr|A0A0U1RQL8|A0A0U1RQL8_HUMAN Macrophage-capping protein (Fragment) OS=Homo sapiens OX=9606 GN=GSN PE=1 SV=1;tr|Q5T0I0|Q5T0I0_HUMAN Macrophage-capping protein (Fragment) OS=Homo sapiens OX=9606 GN=GSN PE=1 SV=1;tr|A0A0A0MS51|A0A0A0MS51_HUMAN Actin-depolym	7	2	2	2	0	0	1	0	0	1	0	0	1	0	0	1	0	0	1	0	0	1	11.2	11.2	11.2	26.3	232	232;260;748;767;781;781;782	0.00046882	2.074			By MS/MS			By MS/MS	0	0	4.7	0	0	6.5
E9PLF1;E9PHN7;E9PHN6;F6XZQ7;P28161	E9PLF1;E9PHN7;E9PHN6;F6XZQ7;P28161	2;2;2;2;2	1;1;1;1;1	1;1;1;1;1	Glutathione S-transferase Mu 2	GSTM2	tr|E9PLF1|E9PLF1_HUMAN Glutathione S-transferase Mu 2 (Fragment) OS=Homo sapiens OX=9606 GN=GSTM2 PE=1 SV=2;tr|E9PHN7|E9PHN7_HUMAN Glutathione S-transferase Mu 2 OS=Homo sapiens OX=9606 GN=GSTM2 PE=1 SV=2;tr|E9PHN6|E9PHN6_HUMAN Glutathione S-transferase OS	5	2	1	1	0	0	1	0	0	1	0	0	1	0	0	1	0	0	1	0	0	1	17.7	11.6	11.6	17.369	147	147;181;193;220;218	0	2.4255			By MS/MS			By MS/MS	0	0	11.6	0	0	11.6
P21266;A0A0A0MTN3;A0A3B3IRM5;Q5T8R1;P46439	P21266;A0A0A0MTN3	8;7;1;1;1	8;7;1;1;1	7;6;0;0;0	Glutathione S-transferase Mu 3	GSTM3	sp|P21266|GSTM3_HUMAN Glutathione S-transferase Mu 3 OS=Homo sapiens OX=9606 GN=GSTM3 PE=1 SV=3;tr|A0A0A0MTN3|A0A0A0MTN3_HUMAN Glutathione S-transferase OS=Homo sapiens OX=9606 GN=GSTM3 PE=1 SV=1	5	8	8	7	0	0	6	0	0	6	0	0	6	0	0	6	0	0	6	0	0	6	32.9	32.9	32.9	26.559	225	225;212;189;218;218	0	31.202			By MS/MS			By MS/MS	0	0	28	0	0	28
P78417;Q5TA02;Q5TA01	P78417;Q5TA02;Q5TA01	2;2;1	2;2;1	2;2;1	Glutathione S-transferase omega-1	GSTO1	sp|P78417|GSTO1_HUMAN Glutathione S-transferase omega-1 OS=Homo sapiens OX=9606 GN=GSTO1 PE=1 SV=2;tr|Q5TA02|Q5TA02_HUMAN Glutathione-dependent dehydroascorbate reductase (Fragment) OS=Homo sapiens OX=9606 GN=GSTO1 PE=1 SV=1;tr|Q5TA01|Q5TA01_HUMAN Glutathi	3	2	2	2	0	0	1	0	0	1	0	0	1	0	0	1	0	0	1	0	0	1	10.4	10.4	10.4	27.566	241	241;200;180	0	3.1148			By MS/MS			By MS/MS	0	0	5	0	0	5
P09211;A8MX94;A0A087X2E9;A0A2R8Y5E5;A0A087X243	P09211;A8MX94	8;7;3;1;1	8;7;3;1;1	8;7;3;1;1	Glutathione S-transferase P	GSTP1	sp|P09211|GSTP1_HUMAN Glutathione S-transferase P OS=Homo sapiens OX=9606 GN=GSTP1 PE=1 SV=2;tr|A8MX94|A8MX94_HUMAN GST class-pi OS=Homo sapiens OX=9606 GN=GSTP1 PE=1 SV=1	5	8	8	8	2	3	6	2	2	7	2	3	6	2	2	7	2	3	6	2	2	7	50.5	50.5	50.5	23.356	210	210;174;79;58;69	0	40.219	By MS/MS	By MS/MS	By MS/MS	By matching	By MS/MS	By MS/MS	15.2	20	37.1	10	18.6	49.5
J3KNC0;P52655	J3KNC0;P52655	1;1	1;1	1;1	Transcription initiation factor IIA subunit 1;Transcription initiation factor IIA alpha chain;Transcription initiation factor IIA beta chain	GTF2A1	tr|J3KNC0|J3KNC0_HUMAN Transcription initiation factor IIA subunit 1 OS=Homo sapiens OX=9606 GN=GTF2A1 PE=1 SV=1;sp|P52655|TF2AA_HUMAN Transcription initiation factor IIA subunit 1 OS=Homo sapiens OX=9606 GN=GTF2A1 PE=1 SV=1	2	1	1	1	1	1	0	1	1	0	1	1	0	1	1	0	1	1	0	1	1	0	23.7	23.7	23.7	6.7407	59	59;376	0	11.49	By matching	By matching		By matching	By MS/MS		23.7	23.7	0	23.7	23.7	0
Q00403	Q00403	1	1	1	Transcription initiation factor IIB	GTF2B	sp|Q00403|TF2B_HUMAN Transcription initiation factor IIB OS=Homo sapiens OX=9606 GN=GTF2B PE=1 SV=1	1	1	1	1	0	0	0	0	0	1	0	0	0	0	0	1	0	0	0	0	0	1	6.6	6.6	6.6	34.833	316	316	0.0067194	1.096						By MS/MS	0	0	0	0	0	6.6
C9IYL4;P29083	C9IYL4;P29083	1;1	1;1	1;1	General transcription factor IIE subunit 1	GTF2E1	tr|C9IYL4|C9IYL4_HUMAN General transcription factor IIE subunit 1 (Fragment) OS=Homo sapiens OX=9606 GN=GTF2E1 PE=1 SV=1;sp|P29083|T2EA_HUMAN General transcription factor IIE subunit 1 OS=Homo sapiens OX=9606 GN=GTF2E1 PE=1 SV=2	2	1	1	1	0	0	1	0	0	0	0	0	1	0	0	0	0	0	1	0	0	0	10.1	10.1	10.1	14.437	129	129;439	0	2.4098			By matching				0	0	10.1	0	0	0
M0R0Z3;P35269	M0R0Z3;P35269	1;1	1;1	1;1	General transcription factor IIF subunit 1	GTF2F1	tr|M0R0Z3|M0R0Z3_HUMAN Transcription initiation factor IIF subunit alpha (Fragment) OS=Homo sapiens OX=9606 GN=GTF2F1 PE=1 SV=1;sp|P35269|T2FA_HUMAN General transcription factor IIF subunit 1 OS=Homo sapiens OX=9606 GN=GTF2F1 PE=1 SV=2	2	1	1	1	0	0	0	0	1	0	0	0	0	0	1	0	0	0	0	0	1	0	15	15	15	14.685	127	127;517	0	7.0391					By matching		0	0	0	0	15	0
P13984	P13984	2	2	2	General transcription factor IIF subunit 2	GTF2F2	sp|P13984|T2FB_HUMAN General transcription factor IIF subunit 2 OS=Homo sapiens OX=9606 GN=GTF2F2 PE=1 SV=2	1	2	2	2	1	1	0	1	1	0	1	1	0	1	1	0	1	1	0	1	1	0	4.8	4.8	4.8	28.38	249	249	0.0078003	1.0601	By MS/MS	By MS/MS		By MS/MS	By MS/MS		3.6	3.6	0	3.6	4.8	0
P32780	P32780	1	1	1	General transcription factor IIH subunit 1	GTF2H1	sp|P32780|TF2H1_HUMAN General transcription factor IIH subunit 1 OS=Homo sapiens OX=9606 GN=GTF2H1 PE=1 SV=1	1	1	1	1	0	0	0	0	0	0	0	0	0	0	0	0	0	0	0	0	0	0	2.4	2.4	2.4	62.031	548	548	0.00045914	1.9193							0	0	0	0	0	0
P78347;A0A494C1K3;A0A494C0Q7	P78347;A0A494C1K3	4;4;1	4;4;1	4;4;1	General transcription factor II-I	GTF2I	sp|P78347|GTF2I_HUMAN General transcription factor II-I OS=Homo sapiens OX=9606 GN=GTF2I PE=1 SV=2;tr|A0A494C1K3|A0A494C1K3_HUMAN General transcription factor II-I OS=Homo sapiens OX=9606 GN=GTF2I PE=1 SV=1	3	4	4	4	1	0	2	0	0	1	1	0	2	0	0	1	1	0	2	0	0	1	5.9	5.9	5.9	112.42	998	998;1159;192	0	4.5895	By matching		By MS/MS			By MS/MS	1.7	0	2.6	0	0	1.7
O75343	O75343	1	1	1	Guanylate cyclase soluble subunit beta-2	GUCY1B2	sp|O75343|GCYB2_HUMAN Guanylate cyclase soluble subunit beta-2 OS=Homo sapiens OX=9606 GN=GUCY1B2 PE=5 SV=2	1	1	1	1	1	1	0	1	1	0	1	1	0	1	1	0	1	1	0	1	1	0	1.8	1.8	1.8	70.367	617	617	1	-2	By MS/MS	By MS/MS		By MS/MS	By MS/MS		1.8	1.8	0	1.8	1.8	0
P54840	P54840	1	1	1	Glycogen [starch] synthase, liver	GYS2	sp|P54840|GYS2_HUMAN Glycogen [starch] synthase, liver OS=Homo sapiens OX=9606 GN=GYS2 PE=1 SV=2	1	1	1	1	0	0	1	0	0	0	0	0	1	0	0	0	0	0	1	0	0	0	2.4	2.4	2.4	80.988	703	703	1	-2			By MS/MS				0	0	2.4	0	0	0
H3BP24;H3BP16;H3BQU2;Q9NVX0	H3BP24;H3BP16;H3BQU2;Q9NVX0	1;1;1;1	1;1;1;1	1;1;1;1	HAUS augmin-like complex subunit 2	HAUS2	tr|H3BP24|H3BP24_HUMAN HAUS augmin-like complex subunit 2 OS=Homo sapiens OX=9606 GN=HAUS2 PE=1 SV=1;tr|H3BP16|H3BP16_HUMAN HAUS augmin-like complex subunit 2 OS=Homo sapiens OX=9606 GN=HAUS2 PE=1 SV=1;tr|H3BQU2|H3BQU2_HUMAN HAUS augmin-like complex subuni	4	1	1	1	0	0	1	0	0	0	0	0	1	0	0	0	0	0	1	0	0	0	14.7	14.7	14.7	10.787	95	95;124;180;235	0	6.3912			By matching				0	0	14.7	0	0	0
Q68CZ6;A0A5F9ZHQ7;D6R993	Q68CZ6;A0A5F9ZHQ7	5;4;1	5;4;1	5;4;1	HAUS augmin-like complex subunit 3	HAUS3	sp|Q68CZ6|HAUS3_HUMAN HAUS augmin-like complex subunit 3 OS=Homo sapiens OX=9606 GN=HAUS3 PE=1 SV=1;tr|A0A5F9ZHQ7|A0A5F9ZHQ7_HUMAN HAUS augmin-like complex subunit 3 OS=Homo sapiens OX=9606 GN=HAUS3 PE=1 SV=1	3	5	5	5	0	0	2	0	0	1	0	0	2	0	0	1	0	0	2	0	0	1	12.3	12.3	12.3	69.65	603	603;935;33	0	35.908			By MS/MS			By matching	0	0	3.6	0	0	2
O94927;U3KQG4;K7EQ61	O94927	11;1;1	11;1;1	11;1;1	HAUS augmin-like complex subunit 5	HAUS5	sp|O94927|HAUS5_HUMAN HAUS augmin-like complex subunit 5 OS=Homo sapiens OX=9606 GN=HAUS5 PE=1 SV=2	3	11	11	11	0	0	4	0	0	8	0	0	4	0	0	8	0	0	4	0	0	8	21.3	21.3	21.3	71.682	633	633;89;168	0	16.554			By MS/MS			By MS/MS	0	0	7	0	0	13.7
Q9BT25	Q9BT25	2	2	2	HAUS augmin-like complex subunit 8	HAUS8	sp|Q9BT25|HAUS8_HUMAN HAUS augmin-like complex subunit 8 OS=Homo sapiens OX=9606 GN=HAUS8 PE=1 SV=3	1	2	2	2	0	0	2	0	0	1	0	0	2	0	0	1	0	0	2	0	0	1	7.3	7.3	7.3	44.857	410	410	0	2.5462			By MS/MS			By MS/MS	0	0	7.3	0	0	3.4
O00165;E9PIQ7;Q5VYD6	O00165;E9PIQ7;Q5VYD6	2;1;1	2;1;1	2;1;1	HCLS1-associated protein X-1	HAX1	sp|O00165|HAX1_HUMAN HCLS1-associated protein X-1 OS=Homo sapiens OX=9606 GN=HAX1 PE=1 SV=2;tr|E9PIQ7|E9PIQ7_HUMAN HCLS1-associated protein X-1 OS=Homo sapiens OX=9606 GN=HAX1 PE=1 SV=1;tr|Q5VYD6|Q5VYD6_HUMAN HCLS1-associated protein X-1 (Fragment) OS=Homo	3	2	2	2	0	0	1	0	0	1	0	0	1	0	0	1	0	0	1	0	0	1	6.5	6.5	6.5	31.62	279	279;151;255	0.007776	1.0462			By matching			By MS/MS	0	0	2.5	0	0	2.5
H0YES5;B7Z524;H0YDX7;J3QT46;Q9Y450	H0YES5;B7Z524;H0YDX7;J3QT46;Q9Y450	1;1;1;1;1	1;1;1;1;1	1;1;1;1;1	HBS1-like protein	HBS1L	tr|H0YES5|H0YES5_HUMAN HBS1-like protein (Fragment) OS=Homo sapiens OX=9606 GN=HBS1L PE=1 SV=1;tr|B7Z524|B7Z524_HUMAN HBS1-like protein OS=Homo sapiens OX=9606 GN=HBS1L PE=1 SV=1;tr|H0YDX7|H0YDX7_HUMAN HBS1-like protein (Fragment) OS=Homo sapiens OX=9606 G	5	1	1	1	0	0	1	1	1	0	0	0	1	1	1	0	0	0	1	1	1	0	11.8	11.8	11.8	18.635	170	170;520;554;619;684	0	4.6925			By MS/MS	By MS/MS	By matching		0	0	11.8	11.8	11.8	0
O15379	O15379	1	1	1	Histone deacetylase 3	HDAC3	sp|O15379|HDAC3_HUMAN Histone deacetylase 3 OS=Homo sapiens OX=9606 GN=HDAC3 PE=1 SV=2	1	1	1	1	0	0	0	0	0	1	0	0	0	0	0	1	0	0	0	0	0	1	4	4	4	48.847	428	428	0.0033642	1.3562						By MS/MS	0	0	0	0	0	4
Q7Z4H3	Q7Z4H3	1	1	1	HD domain-containing protein 2	HDDC2	sp|Q7Z4H3|HDDC2_HUMAN 5-deoxynucleotidase HDDC2 OS=Homo sapiens OX=9606 GN=HDDC2 PE=1 SV=1	1	1	1	1	1	0	0	0	1	0	1	0	0	0	1	0	1	0	0	0	1	0	6.4	6.4	6.4	23.39	204	204	0.0021673	1.5152	By MS/MS				By MS/MS		6.4	0	0	0	6.4	0
H0YNP9;Q8N4P3	H0YNP9;Q8N4P3	2;2	2;2	2;2	Guanosine-3,5-bis(diphosphate) 3-pyrophosphohydrolase MESH1	HDDC3	tr|H0YNP9|H0YNP9_HUMAN Guanosine-3,5-bis(diphosphate) 3-pyrophosphohydrolase MESH1 OS=Homo sapiens OX=9606 GN=HDDC3 PE=1 SV=1;sp|Q8N4P3|MESH1_HUMAN Guanosine-3,5-bis(diphosphate) 3-pyrophosphohydrolase MESH1 OS=Homo sapiens OX=9606 GN=HDDC3 PE=1 SV=3	2	2	2	2	1	0	1	0	2	1	1	0	1	0	2	1	1	0	1	0	2	1	11.9	11.9	11.9	15.956	143	143;179	0	10.904	By MS/MS		By MS/MS		By MS/MS	By matching	11.2	0	11.2	0	11.9	11.2
P51858	P51858	2	2	2	Hepatoma-derived growth factor	HDGF	sp|P51858|HDGF_HUMAN Hepatoma-derived growth factor OS=Homo sapiens OX=9606 GN=HDGF PE=1 SV=1	1	2	2	2	0	0	1	0	2	0	0	0	1	0	2	0	0	0	1	0	2	0	7.1	7.1	7.1	26.788	240	240	0	5.334			By MS/MS		By MS/MS		0	0	6.7	0	7.1	0
Q9H0R4;K7ER15;K7EMY7	Q9H0R4;K7ER15	5;5;1	5;5;1	5;5;1	Haloacid dehalogenase-like hydrolase domain-containing protein 2	HDHD2	sp|Q9H0R4|HDHD2_HUMAN Haloacid dehalogenase-like hydrolase domain-containing protein 2 OS=Homo sapiens OX=9606 GN=HDHD2 PE=1 SV=1;tr|K7ER15|K7ER15_HUMAN Haloacid dehalogenase-like hydrolase domain-containing protein 2 (Fragment) OS=Homo sapiens OX=9606 GN=	3	5	5	5	0	0	2	0	0	4	0	0	2	0	0	4	0	0	2	0	0	4	17	17	17	28.536	259	259;204;146	0	18.843			By MS/MS			By MS/MS	0	0	8.1	0	0	16.6
Q9P2D3	Q9P2D3	1	1	1	HEAT repeat-containing protein 5B	HEATR5B	sp|Q9P2D3|HTR5B_HUMAN HEAT repeat-containing protein 5B OS=Homo sapiens OX=9606 GN=HEATR5B PE=1 SV=2	1	1	1	1	1	1	0	1	0	0	1	1	0	1	0	0	1	1	0	1	0	0	1	1	1	224.3	2071	2071	1	-2	By MS/MS	By MS/MS		By MS/MS			1	1	0	1	0	0
Q9UBI9	Q9UBI9	2	2	2	Headcase protein homolog	HECA	sp|Q9UBI9|HDC_HUMAN Headcase protein homolog OS=Homo sapiens OX=9606 GN=HECA PE=1 SV=1	1	2	2	2	0	0	0	0	0	0	0	0	0	0	0	0	0	0	0	0	0	0	3.7	3.7	3.7	58.836	543	543	0	3.1862							0	0	0	0	0	0
Q15751	Q15751	1	1	1	Probable E3 ubiquitin-protein ligase HERC1	HERC1	sp|Q15751|HERC1_HUMAN Probable E3 ubiquitin-protein ligase HERC1 OS=Homo sapiens OX=9606 GN=HERC1 PE=1 SV=2	1	1	1	1	0	0	1	0	0	0	0	0	1	0	0	0	0	0	1	0	0	0	0.4	0.4	0.4	532.22	4861	4861	1	-2			By MS/MS				0	0	0.4	0	0	0
O94992;Q96MH2	O94992	4;1	4;1	4;1	Protein HEXIM1	HEXIM1	sp|O94992|HEXI1_HUMAN Protein HEXIM1 OS=Homo sapiens OX=9606 GN=HEXIM1 PE=1 SV=1	2	4	4	4	0	0	2	0	0	2	0	0	2	0	0	2	0	0	2	0	0	2	15.3	15.3	15.3	40.623	359	359;286	0	22.309			By MS/MS			By matching	0	0	9.7	0	0	9.7
Q68CP4	Q68CP4	1	1	1	Heparan-alpha-glucosaminide N-acetyltransferase	HGSNAT	sp|Q68CP4|HGNAT_HUMAN Heparan-alpha-glucosaminide N-acetyltransferase OS=Homo sapiens OX=9606 GN=HGSNAT PE=1 SV=2	1	1	1	1	0	0	1	0	0	1	0	0	1	0	0	1	0	0	1	0	0	1	2.4	2.4	2.4	73.293	663	663	0.0029636	1.3914			By MS/MS			By MS/MS	0	0	2.4	0	0	2.4
Q6NVY1	Q6NVY1	1	1	1	3-hydroxyisobutyryl-CoA hydrolase, mitochondrial	HIBCH	sp|Q6NVY1|HIBCH_HUMAN 3-hydroxyisobutyryl-CoA hydrolase, mitochondrial OS=Homo sapiens OX=9606 GN=HIBCH PE=1 SV=2	1	1	1	1	0	0	0	0	0	0	0	0	0	0	0	0	0	0	0	0	0	0	2.6	2.6	2.6	43.482	386	386	1	-2							0	0	0	0	0	0
C9JAW5;C9JNU6;Q9Y241	C9JAW5;C9JNU6;Q9Y241	2;2;2	2;2;2	2;2;2	HIG1 domain family member 1A, mitochondrial	HIGD1A	tr|C9JAW5|C9JAW5_HUMAN HIG1 domain-containing protein OS=Homo sapiens OX=9606 PE=4 SV=1;tr|C9JNU6|C9JNU6_HUMAN HIG1 domain family member 1A, mitochondrial OS=Homo sapiens OX=9606 GN=HIGD1A PE=4 SV=1;sp|Q9Y241|HIG1A_HUMAN HIG1 domain family member 1A, mitoc	3	2	2	2	2	1	0	1	2	0	2	1	0	1	2	0	2	1	0	1	2	0	26.5	26.5	26.5	8.8131	83	83;96;93	0	24.832	By MS/MS	By MS/MS		By MS/MS	By MS/MS		26.5	25.3	0	25.3	26.5	0
Q9BW71	Q9BW71	2	2	2	HIRA-interacting protein 3	HIRIP3	sp|Q9BW71|HIRP3_HUMAN HIRA-interacting protein 3 OS=Homo sapiens OX=9606 GN=HIRIP3 PE=1 SV=3	1	2	2	2	0	1	2	1	0	1	0	1	2	1	0	1	0	1	2	1	0	1	5.6	5.6	5.6	61.956	556	556	0	3.4636		By MS/MS	By MS/MS	By MS/MS		By MS/MS	0	2.5	5.6	2.5	0	3.1
P16403;P16402;Q02539;P22492;P16401	P16403;P16402	7;5;2;1;1	2;0;0;0;0	2;0;0;0;0	Histone H1.2;Histone H1.3	HIST1H1C;HIST1H1D	sp|P16403|H12_HUMAN Histone H1.2 OS=Homo sapiens OX=9606 GN=H1-2 PE=1 SV=2;sp|P16402|H13_HUMAN Histone H1.3 OS=Homo sapiens OX=9606 GN=H1-3 PE=1 SV=2	5	7	2	2	3	2	1	2	6	0	1	0	1	0	2	0	1	0	1	0	2	0	32.4	9.9	9.9	21.364	213	213;221;215;207;226	0	7.6567	By MS/MS	By matching	By MS/MS	By matching	By MS/MS		16	6.1	9.4	6.1	25.4	0
Q16778;P33778;P23527;P06899;Q8N257;Q6DRA6;Q6DN03	Q16778;P33778;P23527;P06899;Q8N257	6;6;6;6;5;1;1	1;1;1;1;1;1;1	1;1;1;1;1;1;1	Histone H2B type 2-E;Histone H2B type 1-B;Histone H2B type 1-O;Histone H2B type 1-J;Histone H2B type 3-B	HIST2H2BE;HIST1H2BB;HIST1H2BO;HIST1H2BJ;HIST3H2BB	sp|Q16778|H2B2E_HUMAN Histone H2B type 2-E OS=Homo sapiens OX=9606 GN=H2BC21 PE=1 SV=3;sp|P33778|H2B1B_HUMAN Histone H2B type 1-B OS=Homo sapiens OX=9606 GN=H2BC3 PE=1 SV=2;sp|P23527|H2B1O_HUMAN Histone H2B type 1-O OS=Homo sapiens OX=9606 GN=H2BC17 PE=1 S	7	6	1	1	2	2	2	2	3	2	0	0	0	0	0	0	0	0	0	0	0	0	54.8	7.9	7.9	13.92	126	126;126;126;126;126;164;193	1	-2	By matching	By matching	By matching	By matching	By matching	By matching	17.5	17.5	19	17.5	23.8	19
P19367	P19367	1	1	1	Hexokinase-1	HK1	sp|P19367|HXK1_HUMAN Hexokinase-1 OS=Homo sapiens OX=9606 GN=HK1 PE=1 SV=3	1	1	1	1	0	0	0	0	0	1	0	0	0	0	0	1	0	0	0	0	0	1	1.6	1.6	1.6	102.48	917	917	0.00045393	1.8504						By MS/MS	0	0	0	0	0	1.6
Q96RW7	Q96RW7	2	2	2	Hemicentin-1	HMCN1	sp|Q96RW7|HMCN1_HUMAN Hemicentin-1 OS=Homo sapiens OX=9606 GN=HMCN1 PE=1 SV=2	1	2	2	2	0	0	0	0	0	0	0	0	0	0	0	0	0	0	0	0	0	0	0.5	0.5	0.5	613.38	5635	5635	0.0033501	1.3348							0	0	0	0	0	0
P26583;D6R9A6	P26583	3;1	1;1	1;1	High mobility group protein B2	HMGB2	sp|P26583|HMGB2_HUMAN High mobility group protein B2 OS=Homo sapiens OX=9606 GN=HMGB2 PE=1 SV=2	2	3	1	1	0	0	0	0	2	1	0	0	0	0	0	0	0	0	0	0	0	0	12.9	7.7	7.7	24.033	209	209;134	0.00045893	1.9172					By matching	By matching	0	0	0	0	5.3	4.3
Q8WW32	Q8WW32	1	1	1	High mobility group protein B4	HMGB4	sp|Q8WW32|HMGB4_HUMAN High mobility group protein B4 OS=Homo sapiens OX=9606 GN=HMGB4 PE=1 SV=2	1	1	1	1	1	1	0	1	1	0	1	1	0	1	1	0	1	1	0	1	1	0	4.8	4.8	4.8	22.49	186	186	1	-2	By MS/MS	By MS/MS		By MS/MS	By MS/MS		4.8	4.8	0	4.8	4.8	0
Q01581	Q01581	6	6	6	Hydroxymethylglutaryl-CoA synthase, cytoplasmic	HMGCS1	sp|Q01581|HMCS1_HUMAN Hydroxymethylglutaryl-CoA synthase, cytoplasmic OS=Homo sapiens OX=9606 GN=HMGCS1 PE=1 SV=2	1	6	6	6	1	1	5	1	1	4	1	1	5	1	1	4	1	1	5	1	1	4	25.6	25.6	25.6	57.293	520	520	0	138.99	By MS/MS	By MS/MS	By MS/MS	By MS/MS	By MS/MS	By MS/MS	3.5	3.5	21.3	3.5	3.5	16.9
O75330	O75330	2	2	2	Hyaluronan mediated motility receptor	HMMR	sp|O75330|HMMR_HUMAN Hyaluronan mediated motility receptor OS=Homo sapiens OX=9606 GN=HMMR PE=1 SV=2	1	2	2	2	0	0	1	0	0	2	0	0	1	0	0	2	0	0	1	0	0	2	4.8	4.8	4.8	84.099	724	724	0	5.2423			By MS/MS			By MS/MS	0	0	1.9	0	0	4.8
J3KT51;Q9UK76;F2Z3M5;J3KSH8	J3KT51;Q9UK76;F2Z3M5	3;3;2;1	3;3;2;1	3;3;2;1	Hematological and neurological expressed 1 protein;Hematological and neurological expressed 1 protein, N-terminally processed	HN1	tr|J3KT51|J3KT51_HUMAN Jupiter microtubule-associated homolog 1 OS=Homo sapiens OX=9606 GN=JPT1 PE=1 SV=1;sp|Q9UK76|JUPI1_HUMAN Jupiter microtubule associated homolog 1 OS=Homo sapiens OX=9606 GN=JPT1 PE=1 SV=3;tr|F2Z3M5|F2Z3M5_HUMAN Jupiter microtubule-as	4	3	3	3	3	2	0	2	3	0	3	2	0	2	3	0	3	2	0	2	3	0	31.7	31.7	31.7	11.012	104	104;154;44;93	0	8.4411	By MS/MS	By MS/MS		By MS/MS	By MS/MS		31.7	31.7	0	31.7	31.7	0
A0A7I2V323;A0A7I2V4N1;A0A7I2V3P1;A0A7I2V3P7;A0A7I2V4S4;A0A024RA28;A0A7I2V4N0;A0A7I2YQN4	A0A7I2V323;A0A7I2V4N1;A0A7I2V3P1;A0A7I2V3P7;A0A7I2V4S4;A0A024RA28;A0A7I2V4N0	42;40;40;39;37;34;21;17	1;1;1;1;1;0;1;1	1;1;1;1;1;0;1;1		HNRPA2B1	tr|A0A7I2V323|A0A7I2V323_HUMAN Heterogeneous nuclear ribonucleoproteins A2/B1 OS=Homo sapiens OX=9606 GN=HNRNPA2B1 PE=1 SV=1;tr|A0A7I2V4N1|A0A7I2V4N1_HUMAN Heterogeneous nuclear ribonucleoproteins A2/B1 OS=Homo sapiens OX=9606 GN=HNRNPA2B1 PE=1 SV=1;tr|A0A	8	42	1	1	23	24	21	25	24	32	0	0	0	0	0	1	0	0	0	0	0	1	85.3	2.7	2.7	35.222	333	333;301;309;325;260;301;158;155	1	-2	By matching	By matching	By matching	By matching	By matching	By MS/MS	57.4	61.6	66.7	65.8	62.8	80.2
P49639;A0A2R8Y4R9;E7ERT8	P49639;A0A2R8Y4R9;E7ERT8	2;2;1	1;1;1	1;1;1	Homeobox protein Hox-A1	HOXA1	sp|P49639|HXA1_HUMAN Homeobox protein Hox-A1 OS=Homo sapiens OX=9606 GN=HOXA1 PE=1 SV=2;tr|A0A2R8Y4R9|A0A2R8Y4R9_HUMAN Homeobox protein Hox-A1 OS=Homo sapiens OX=9606 GN=HOXA1 PE=1 SV=1;tr|E7ERT8|E7ERT8_HUMAN Homeobox protein Hox-A1 OS=Homo sapiens OX=9606	3	2	1	1	1	0	0	1	0	2	0	0	0	0	0	1	0	0	0	0	0	1	9.3	7.2	7.2	36.641	335	335;335;137	0	3.1342	By matching			By matching		By MS/MS	2.1	0	0	2.1	0	9.3
P17482	P17482	5	4	4	Homeobox protein Hox-B9	HOXB9	sp|P17482|HXB9_HUMAN Homeobox protein Hox-B9 OS=Homo sapiens OX=9606 GN=HOXB9 PE=1 SV=2	1	5	4	4	1	0	2	1	2	5	0	0	2	0	2	4	0	0	2	0	2	4	33.2	30.4	30.4	28.058	250	250	0	38.126	By matching		By MS/MS	By matching	By MS/MS	By MS/MS	2.8	0	10.4	2.8	20	33.2
P31274	P31274	2	1	1	Homeobox protein Hox-C9	HOXC9	sp|P31274|HXC9_HUMAN Homeobox protein Hox-C9 OS=Homo sapiens OX=9606 GN=HOXC9 PE=1 SV=3	1	2	1	1	1	0	1	1	0	2	0	0	1	0	0	1	0	0	1	0	0	1	10.4	7.7	7.7	29.248	260	260	0	21.186	By matching		By MS/MS	By matching		By MS/MS	2.7	0	7.7	2.7	0	10.4
P28358	P28358	2	1	1	Homeobox protein Hox-D10	HOXD10	sp|P28358|HXD10_HUMAN Homeobox protein Hox-D10 OS=Homo sapiens OX=9606 GN=HOXD10 PE=1 SV=2	1	2	1	1	1	0	1	1	0	2	0	0	1	0	0	1	0	0	1	0	0	1	5.6	3.5	3.5	38.41	340	340	0.00047037	2.1033	By matching		By matching	By matching		By matching	2.1	0	3.5	2.1	0	5.6
CON__Q86YZ3;Q86YZ3	CON__Q86YZ3;Q86YZ3	3;3	3;3	3;3	Hornerin	HRNR	;Q86YZ3 SWISS-PROT:Q86YZ3 Tax_Id=9606 Gene_Symbol=HRNR Hornerin	2	3	3	3	0	0	0	0	0	3	0	0	0	0	0	3	0	0	0	0	0	3	4	4	4	282.39	2850	2850;2850	0	6.6452						By MS/MS	0	0	0	0	0	4
Q53T59;H7C0Y9;F8WDN8;H7BZZ1;B5MC96;F6TR53	Q53T59;H7C0Y9;F8WDN8;H7BZZ1;B5MC96;F6TR53	2;1;1;1;1;1	2;1;1;1;1;1	2;1;1;1;1;1	HCLS1-binding protein 3	HS1BP3	sp|Q53T59|H1BP3_HUMAN HCLS1-binding protein 3 OS=Homo sapiens OX=9606 GN=HS1BP3 PE=1 SV=1;tr|H7C0Y9|H7C0Y9_HUMAN HCLS1-binding protein 3 (Fragment) OS=Homo sapiens OX=9606 GN=HS1BP3 PE=1 SV=1;tr|F8WDN8|F8WDN8_HUMAN HCLS1-binding protein 3 (Fragment) OS=Hom	6	2	2	2	1	0	0	1	1	1	1	0	0	1	1	1	1	0	0	1	1	1	7.7	7.7	7.7	42.78	392	392;111;123;132;199;213	0	3.5219	By MS/MS			By MS/MS	By MS/MS	By MS/MS	4.8	0	0	4.8	4.8	2.8
E7ER27;A0A2R8YD50;P51659;A0A2R8Y7L2;E7ET17;A0A2R8YEG2;A0A2R8Y7W2;A0A2R8YDT8;A0A2R8YF45;E7EPL9	E7ER27;A0A2R8YD50;P51659;A0A2R8Y7L2;E7ET17	3;3;3;2;2;1;1;1;1;1	3;3;3;2;2;1;1;1;1;1	3;3;3;2;2;1;1;1;1;1	Peroxisomal multifunctional enzyme type 2;(3R)-hydroxyacyl-CoA dehydrogenase;Enoyl-CoA hydratase 2	HSD17B4	tr|E7ER27|E7ER27_HUMAN Peroxisomal multifunctional enzyme type 2 OS=Homo sapiens OX=9606 GN=HSD17B4 PE=1 SV=3;tr|A0A2R8YD50|A0A2R8YD50_HUMAN Peroxisomal multifunctional enzyme type 2 OS=Homo sapiens OX=9606 GN=HSD17B4 PE=1 SV=1;sp|P51659|DHB4_HUMAN Peroxis	10	3	3	3	0	0	2	0	0	1	0	0	2	0	0	1	0	0	2	0	0	1	8	8	8	53.928	500	500;711;736;589;599;59;105;166;172;474	0	2.875			By MS/MS			By MS/MS	0	0	6.2	0	0	3
Q6YN16	Q6YN16	2	2	2	Hydroxysteroid dehydrogenase-like protein 2	HSDL2	sp|Q6YN16|HSDL2_HUMAN Hydroxysteroid dehydrogenase-like protein 2 OS=Homo sapiens OX=9606 GN=HSDL2 PE=1 SV=1	1	2	2	2	0	0	1	0	0	1	0	0	1	0	0	1	0	0	1	0	0	1	7.4	7.4	7.4	45.394	418	418	0	3.2017			By MS/MS			By MS/MS	0	0	3.1	0	0	4.3
Q14568	Q14568	13	1	1	Heat shock protein HSP 90-alpha A2	HSP90AA2P	sp|Q14568|HS902_HUMAN Heat shock protein HSP 90-alpha A2 OS=Homo sapiens OX=9606 GN=HSP90AA2P PE=1 SV=2	1	13	1	1	8	9	9	10	11	12	0	0	1	0	1	1	0	0	1	0	1	1	32.4	3.8	3.8	39.364	343	343	0	4.773	By matching	By matching	By MS/MS	By matching	By MS/MS	By MS/MS	19	22.4	30.3	24.2	28	32.4
Q58FG0	Q58FG0	9	1	1	Putative heat shock protein HSP 90-alpha A5	HSP90AA5P	sp|Q58FG0|HS905_HUMAN Putative heat shock protein HSP 90-alpha A5 OS=Homo sapiens OX=9606 GN=HSP90AA5P PE=2 SV=1	1	9	1	1	3	4	4	4	5	9	0	0	1	0	0	1	0	0	1	0	0	1	19.2	4.5	4.5	38.738	334	334	1	-2	By matching	By matching	By MS/MS	By matching	By matching	By matching	11.7	11.7	12.9	11.7	11.7	19.2
A0A7P0TAE1;H0YIV0;A0A7P0T823;A0A7P0TAT8;P14625;A0A7P0T917;A0A7P0TAY2;A0A087WT78;A0A7P0TBC2;A0A7P0Z405;A0A7P0T8R3;A0A7P0T885	A0A7P0TAE1;H0YIV0;A0A7P0T823;A0A7P0TAT8;P14625;A0A7P0T917;A0A7P0TAY2;A0A087WT78;A0A7P0TBC2	8;8;8;8;8;7;6;6;5;3;3;3	6;6;6;6;6;5;4;4;3;1;1;1	6;6;6;6;6;5;4;4;3;1;1;1	Endoplasmin	HSP90B1	tr|A0A7P0TAE1|A0A7P0TAE1_HUMAN Endoplasmin OS=Homo sapiens OX=9606 GN=HSP90B1 PE=4 SV=1;tr|H0YIV0|H0YIV0_HUMAN Endoplasmin OS=Homo sapiens OX=9606 GN=HSP90B1 PE=1 SV=2;tr|A0A7P0T823|A0A7P0T823_HUMAN Endoplasmin OS=Homo sapiens OX=9606 GN=HSP90B1 PE=4 SV=1;	12	8	6	6	1	1	3	1	4	2	0	0	1	0	3	0	0	0	1	0	3	0	15.1	13.3	13.3	90.75	789	789;796;813;814;803;719;661;751;465;163;251;274	0	15.232	By matching	By matching	By MS/MS	By matching	By MS/MS	By matching	1.8	1.8	3.7	1.8	8.9	1.8
A6NIR2;X6R7Y7;Q9Y547	A6NIR2;X6R7Y7;Q9Y547	1;1;1	1;1;1	1;1;1	Intraflagellar transport protein 25 homolog	HSPB11	tr|A6NIR2|A6NIR2_HUMAN Chromosome 1 open reading frame 41, isoform CRA_b OS=Homo sapiens OX=9606 GN=HSPB11 PE=1 SV=1;tr|X6R7Y7|X6R7Y7_HUMAN Intraflagellar transport protein 25 homolog OS=Homo sapiens OX=9606 GN=HSPB11 PE=1 SV=1;sp|Q9Y547|IFT25_HUMAN Intraf	3	1	1	1	0	0	1	0	0	1	0	0	1	0	0	1	0	0	1	0	0	1	10.7	10.7	10.7	13.028	112	112;214;144	0.0078156	1.0672			By MS/MS			By MS/MS	0	0	10.7	0	0	10.7
Q9NZL4	Q9NZL4	1	1	1	Hsp70-binding protein 1	HSPBP1	sp|Q9NZL4|HPBP1_HUMAN Hsp70-binding protein 1 OS=Homo sapiens OX=9606 GN=HSPBP1 PE=1 SV=2	1	1	1	1	1	0	0	0	0	0	1	0	0	0	0	0	1	0	0	0	0	0	5	5	5	39.302	359	359	1	-2	By MS/MS						5	0	0	0	0	0
P61604;B8ZZL8;B8ZZ54	P61604;B8ZZL8	5;4;1	1;0;1	1;0;1	10 kDa heat shock protein, mitochondrial	HSPE1	sp|P61604|CH10_HUMAN 10 kDa heat shock protein, mitochondrial OS=Homo sapiens OX=9606 GN=HSPE1 PE=1 SV=2;tr|B8ZZL8|B8ZZL8_HUMAN 10 kDa heat shock protein, mitochondrial OS=Homo sapiens OX=9606 GN=HSPE1 PE=1 SV=1	3	5	1	1	2	0	2	0	3	1	0	0	1	0	0	1	0	0	1	0	0	1	44.1	11.8	11.8	10.932	102	102;101;47	0	2.5276	By matching		By MS/MS		By matching	By matching	27.5	0	25.5	0	32.4	11.8
S4R3N1;B4DM50;Q9Y3A3	S4R3N1	5;1;1	5;1;1	1;1;1		HSPE1-MOB4	tr|S4R3N1|S4R3N1_HUMAN 10 kDa heat shock protein, mitochondrial OS=Homo sapiens OX=9606 GN=HSPE1-MOB4 PE=1 SV=1	3	5	5	1	2	0	2	0	3	1	2	0	2	0	3	1	0	0	1	0	0	1	19.9	19.9	7.3	29.736	261	261;126;225	0	17.606	By MS/MS		By MS/MS		By MS/MS	By MS/MS	10.7	0	12.6	0	12.6	7.3
Q7Z6Z7	Q7Z6Z7	2	2	2	E3 ubiquitin-protein ligase HUWE1	HUWE1	sp|Q7Z6Z7|HUWE1_HUMAN E3 ubiquitin-protein ligase HUWE1 OS=Homo sapiens OX=9606 GN=HUWE1 PE=1 SV=3	1	2	2	2	0	0	0	0	0	2	0	0	0	0	0	2	0	0	0	0	0	2	0.7	0.7	0.7	481.89	4374	4374	0	15.675						By MS/MS	0	0	0	0	0	0.7
J3QT56	J3QT56	1	1	1		HYPK	tr|J3QT56|J3QT56_HUMAN Huntingtin-interacting protein K OS=Homo sapiens OX=9606 GN=HYPK PE=1 SV=2	1	1	1	1	0	0	0	0	1	0	0	0	0	0	1	0	0	0	0	0	1	0	33.8	33.8	33.8	8.2346	74	74	0	15.767					By MS/MS		0	0	0	0	33.8	0
Q2TAA2;H7C5G1;F8WF34	Q2TAA2;H7C5G1	6;5;1	6;5;1	6;5;1	Isoamyl acetate-hydrolyzing esterase 1 homolog	IAH1	sp|Q2TAA2|IAH1_HUMAN Isoamyl acetate-hydrolyzing esterase 1 homolog OS=Homo sapiens OX=9606 GN=IAH1 PE=1 SV=1;tr|H7C5G1|H7C5G1_HUMAN Isoamyl acetate-hydrolyzing esterase 1 homolog (Fragment) OS=Homo sapiens OX=9606 GN=IAH1 PE=1 SV=1	3	6	6	6	0	0	3	0	0	5	0	0	3	0	0	5	0	0	3	0	0	5	24.6	24.6	24.6	27.598	248	248;228;40	0	12.401			By MS/MS			By MS/MS	0	0	11.7	0	0	24.6
P41252;A0A0A0MSX9;J3KR24	P41252;A0A0A0MSX9;J3KR24	14;13;11	14;13;11	14;13;11	Isoleucine--tRNA ligase, cytoplasmic	IARS	sp|P41252|SYIC_HUMAN Isoleucine--tRNA ligase, cytoplasmic OS=Homo sapiens OX=9606 GN=IARS1 PE=1 SV=2;tr|A0A0A0MSX9|A0A0A0MSX9_HUMAN Isoleucyl-tRNA synthetase OS=Homo sapiens OX=9606 GN=IARS1 PE=1 SV=1;tr|J3KR24|J3KR24_HUMAN Isoleucyl-tRNA synthetase OS=Hom	3	14	14	14	0	0	7	0	0	10	0	0	7	0	0	10	0	0	7	0	0	10	16.2	16.2	16.2	144.5	1262	1262;1242;1121	0	29.889			By MS/MS			By MS/MS	0	0	5.5	0	0	11.3
Q5T440	Q5T440	1	1	1	Putative transferase CAF17, mitochondrial	IBA57	sp|Q5T440|CAF17_HUMAN Putative transferase CAF17, mitochondrial OS=Homo sapiens OX=9606 GN=IBA57 PE=1 SV=1	1	1	1	1	0	0	1	0	0	1	0	0	1	0	0	1	0	0	1	0	0	1	4.2	4.2	4.2	38.155	356	356	0.0025674	1.4405			By MS/MS			By matching	0	0	4.2	0	0	4.2
E7EPI0;Q9P2D0	E7EPI0;Q9P2D0	1;1	1;1	1;1	Inhibitor of Bruton tyrosine kinase	IBTK	tr|E7EPI0|E7EPI0_HUMAN Inhibitor of Bruton tyrosine kinase OS=Homo sapiens OX=9606 GN=IBTK PE=1 SV=1;sp|Q9P2D0|IBTK_HUMAN Inhibitor of Bruton tyrosine kinase OS=Homo sapiens OX=9606 GN=IBTK PE=1 SV=3	2	1	1	1	0	0	1	0	0	0	0	0	1	0	0	0	0	0	1	0	0	0	1.5	1.5	1.5	149.01	1338	1338;1353	0	5.4064			By MS/MS				0	0	1.5	0	0	0
O75874;C9JJE5;C9JLU6;C9J4N6	O75874;C9JJE5;C9JLU6;C9J4N6	2;1;1;1	2;1;1;1	2;1;1;1	Isocitrate dehydrogenase [NADP] cytoplasmic	IDH1	sp|O75874|IDHC_HUMAN Isocitrate dehydrogenase [NADP] cytoplasmic OS=Homo sapiens OX=9606 GN=IDH1 PE=1 SV=2;tr|C9JJE5|C9JJE5_HUMAN Isocitrate dehydrogenase [NADP] cytoplasmic (Fragment) OS=Homo sapiens OX=9606 GN=IDH1 PE=1 SV=1;tr|C9JLU6|C9JLU6_HUMAN Isocit	4	2	2	2	0	0	1	0	0	2	0	0	1	0	0	2	0	0	1	0	0	2	6.3	6.3	6.3	46.659	414	414;62;73;157	0	4.3333			By matching			By MS/MS	0	0	4.1	0	0	6.3
Q5T764	Q5T764	1	1	1	Interferon-induced protein with tetratricopeptide repeats 1B	IFIT1B	sp|Q5T764|IFT1B_HUMAN Interferon-induced protein with tetratricopeptide repeats 1B OS=Homo sapiens OX=9606 GN=IFIT1B PE=1 SV=1	1	1	1	1	0	0	0	0	0	1	0	0	0	0	0	1	0	0	0	0	0	1	3.4	3.4	3.4	54.992	474	474	1	-2						By MS/MS	0	0	0	0	0	3.4
A0A087X2B4;Q8IY31	A0A087X2B4;Q8IY31	1;1	1;1	1;1	Intraflagellar transport protein 20 homolog	IFT20	tr|A0A087X2B4|A0A087X2B4_HUMAN Intraflagellar transport 20 homolog (Chlamydomonas), isoform CRA_b OS=Homo sapiens OX=9606 GN=IFT20 PE=1 SV=1;sp|Q8IY31|IFT20_HUMAN Intraflagellar transport protein 20 homolog OS=Homo sapiens OX=9606 GN=IFT20 PE=1 SV=1	2	1	1	1	1	1	0	0	1	0	1	1	0	0	1	0	1	1	0	0	1	0	25.7	25.7	25.7	8.3145	74	74;132	0	13.689	By MS/MS	By MS/MS			By MS/MS		25.7	25.7	0	0	25.7	0
Q9H7X7	Q9H7X7	3	3	3	Intraflagellar transport protein 22 homolog	IFT22	sp|Q9H7X7|IFT22_HUMAN Intraflagellar transport protein 22 homolog OS=Homo sapiens OX=9606 GN=IFT22 PE=1 SV=1	1	3	3	3	0	0	2	0	0	2	0	0	2	0	0	2	0	0	2	0	0	2	18.4	18.4	18.4	20.835	185	185	0	82.424			By MS/MS			By MS/MS	0	0	18.4	0	0	18.4
H0Y6C7;F5GZ09;Q9BW83	H0Y6C7;F5GZ09;Q9BW83	2;2;2	2;2;2	2;2;2	Intraflagellar transport protein 27 homolog	IFT27	tr|H0Y6C7|H0Y6C7_HUMAN Intraflagellar transport protein 27 homolog (Fragment) OS=Homo sapiens OX=9606 GN=IFT27 PE=1 SV=1;tr|F5GZ09|F5GZ09_HUMAN Intraflagellar transport protein 27 homolog (Fragment) OS=Homo sapiens OX=9606 GN=IFT27 PE=1 SV=1;sp|Q9BW83|IFT2	3	2	2	2	0	0	1	0	0	0	0	0	1	0	0	0	0	0	1	0	0	0	17.1	17.1	17.1	13.919	129	129;183;186	0	3.8089			By MS/MS				0	0	12.4	0	0	0
Q9NZI8	Q9NZI8	12	12	11	Insulin-like growth factor 2 mRNA-binding protein 1	IGF2BP1	sp|Q9NZI8|IF2B1_HUMAN Insulin-like growth factor 2 mRNA-binding protein 1 OS=Homo sapiens OX=9606 GN=IGF2BP1 PE=1 SV=2	1	12	12	11	0	1	7	0	0	8	0	1	7	0	0	8	0	1	7	0	0	7	25.8	25.8	25.8	63.48	577	577	0	160.79		By MS/MS	By MS/MS			By MS/MS	0	2.9	16.6	0	0	20.3
O00425	O00425	4	3	3	Insulin-like growth factor 2 mRNA-binding protein 3	IGF2BP3	sp|O00425|IF2B3_HUMAN Insulin-like growth factor 2 mRNA-binding protein 3 OS=Homo sapiens OX=9606 GN=IGF2BP3 PE=1 SV=2	1	4	3	3	0	0	3	0	0	3	0	0	3	0	0	2	0	0	3	0	0	2	9.8	8.1	8.1	63.704	579	579	0	48.821			By MS/MS			By MS/MS	0	0	8.1	0	0	7.1
A0A5H1ZRQ3;P01834	A0A5H1ZRQ3;P01834	1;1	1;1	1;1	Ig kappa chain C region	IGKC	tr|A0A5H1ZRQ3|A0A5H1ZRQ3_HUMAN Immunoglobulin kappa constant (Fragment) OS=Homo sapiens OX=9606 GN=IGKC PE=1 SV=1;sp|P01834|IGKC_HUMAN Immunoglobulin kappa constant OS=Homo sapiens OX=9606 GN=IGKC PE=1 SV=2	2	1	1	1	0	0	1	0	0	1	0	0	1	0	0	1	0	0	1	0	0	1	15	15	15	11.609	107	107;107	0	7.8878			By MS/MS			By MS/MS	0	0	15	0	0	15
Q6WRI0	Q6WRI0	1	1	1	Immunoglobulin superfamily member 10	IGSF10	sp|Q6WRI0|IGS10_HUMAN Immunoglobulin superfamily member 10 OS=Homo sapiens OX=9606 GN=IGSF10 PE=1 SV=1	1	1	1	1	0	0	0	0	0	0	0	0	0	0	0	0	0	0	0	0	0	0	0.4	0.4	0.4	290.83	2623	2623	1	-2							0	0	0	0	0	0
O95163;A0A6Q8PHC9;A0A6Q8PHF4;A0A6Q8PG86;A0A6Q8PEX6;A0A6Q8PFB7;A0A6Q8PHI5;A0A6Q8PH48;A0A6Q8PFH9;A0A6Q8PGW3;A0A6Q8PF66;F5H2T0;A0A6Q8PFN8;A0A6Q8PHA0;A0A6Q8PGR0;A0A6Q8PF69;A0A6Q8PGA6;A0A6Q8PFC8;A0A6Q8PGC4;A0A6Q8PH36;H0YDF3;A0A6Q8PFX1	O95163;A0A6Q8PHC9;A0A6Q8PHF4;A0A6Q8PG86;A0A6Q8PEX6;A0A6Q8PFB7;A0A6Q8PHI5;A0A6Q8PH48;A0A6Q8PFH9;A0A6Q8PGW3;A0A6Q8PF66;F5H2T0;A0A6Q8PFN8;A0A6Q8PHA0;A0A6Q8PGR0;A0A6Q8PF69	13;12;12;12;12;12;12;11;11;11;10;10;10;10;9;9;3;2;2;2;2;2	13;12;12;12;12;12;12;11;11;11;10;10;10;10;9;9;3;2;2;2;2;2	13;12;12;12;12;12;12;11;11;11;10;10;10;10;9;9;3;2;2;2;2;2	Elongator complex protein 1	IKBKAP	sp|O95163|ELP1_HUMAN Elongator complex protein 1 OS=Homo sapiens OX=9606 GN=ELP1 PE=1 SV=3;tr|A0A6Q8PHC9|A0A6Q8PHC9_HUMAN Elongator complex protein 1 OS=Homo sapiens OX=9606 GN=ELP1 PE=1 SV=1;tr|A0A6Q8PHF4|A0A6Q8PHF4_HUMAN Elongator complex protein 1 OS=Ho	22	13	13	13	0	1	9	0	1	7	0	1	9	0	1	7	0	1	9	0	1	7	15.2	15.2	15.2	150.25	1332	1332;1346;1343;1302;1299;1295;1184;1091;1313;1218;1232;983;928;892;812;810;446;186;221;195;193;137	0	33.565		By matching	By MS/MS		By matching	By MS/MS	0	0.9	10.5	0	1.6	8.6
Q9H0C8;H7C2I8;F8SNU7;E9PC05	Q9H0C8;H7C2I8;F8SNU7	3;2;2;1	3;2;2;1	3;2;2;1	Integrin-linked kinase-associated serine/threonine phosphatase 2C	ILKAP;ILKAP3	sp|Q9H0C8|ILKAP_HUMAN Integrin-linked kinase-associated serine/threonine phosphatase 2C OS=Homo sapiens OX=9606 GN=ILKAP PE=1 SV=1;tr|H7C2I8|H7C2I8_HUMAN Integrin-linked kinase-associated serine/threonine phosphatase 2C (Fragment) OS=Homo sapiens OX=9606 G	4	3	3	3	1	0	1	0	0	3	1	0	1	0	0	3	1	0	1	0	0	3	8.7	8.7	8.7	42.906	392	392;203;274;212	0.0021739	1.5394	By matching		By MS/MS			By MS/MS	3.6	0	3.6	0	0	8.7
H7C463;C9J406;B9A067;Q16891	H7C463;C9J406;B9A067;Q16891	1;1;1;1	1;1;1;1	1;1;1;1	MICOS complex subunit MIC60	IMMT	tr|H7C463|H7C463_HUMAN MICOS complex subunit MIC60 (Fragment) OS=Homo sapiens OX=9606 GN=IMMT PE=1 SV=1;tr|C9J406|C9J406_HUMAN MICOS complex subunit MIC60 OS=Homo sapiens OX=9606 GN=IMMT PE=1 SV=1;tr|B9A067|B9A067_HUMAN MICOS complex subunit MIC60 OS=Homo	4	1	1	1	0	0	0	0	1	0	0	0	0	0	1	0	0	0	0	0	1	0	3.3	3.3	3.3	68.064	613	613;659;711;758	0.00046296	2.0008					By MS/MS		0	0	0	0	3.3	0
Q9NV31	Q9NV31	1	1	1	U3 small nucleolar ribonucleoprotein protein IMP3	IMP3	sp|Q9NV31|IMP3_HUMAN U3 small nucleolar ribonucleoprotein protein IMP3 OS=Homo sapiens OX=9606 GN=IMP3 PE=1 SV=1	1	1	1	1	0	0	0	0	0	0	0	0	0	0	0	0	0	0	0	0	0	0	9.8	9.8	9.8	21.85	184	184	0	8.8051							0	0	0	0	0	0
A0A0X1KG69;A0A087WUZ6;A0A2R8Y549;Q8NI35	A0A0X1KG69;A0A087WUZ6;A0A2R8Y549;Q8NI35	1;1;1;1	1;1;1;1	1;1;1;1	InaD-like protein	INADL	tr|A0A0X1KG69|A0A0X1KG69_HUMAN InaD-like protein OS=Homo sapiens OX=9606 GN=PATJ PE=1 SV=1;tr|A0A087WUZ6|A0A087WUZ6_HUMAN InaD-like protein OS=Homo sapiens OX=9606 GN=PATJ PE=1 SV=1;tr|A0A2R8Y549|A0A2R8Y549_HUMAN InaD-like protein OS=Homo sapiens OX=9606 G	4	1	1	1	0	0	0	0	0	0	0	0	0	0	0	0	0	0	0	0	0	0	1.4	1.4	1.4	129.98	1181	1181;1182;1882;1801	0.007764	1.0446							0	0	0	0	0	0
K7EQ79;Q6PI98;K7ELX9;K7ENM4;K7ENP7;K7EIY8	K7EQ79;Q6PI98;K7ELX9;K7ENM4;K7ENP7;K7EIY8	2;2;1;1;1;1	2;2;1;1;1;1	2;2;1;1;1;1	INO80 complex subunit C	INO80C	tr|K7EQ79|K7EQ79_HUMAN INO80 complex subunit C OS=Homo sapiens OX=9606 GN=INO80C PE=1 SV=1;sp|Q6PI98|IN80C_HUMAN INO80 complex subunit C OS=Homo sapiens OX=9606 GN=INO80C PE=1 SV=1;tr|K7ELX9|K7ELX9_HUMAN INO80 complex subunit C OS=Homo sapiens OX=9606 GN=I	6	2	2	2	0	0	2	0	0	0	0	0	2	0	0	0	0	0	2	0	0	0	32.6	32.6	32.6	10.06	95	95;192;89;98;123;137	0.00045872	1.9145			By MS/MS				0	0	32.6	0	0	0
P14616	P14616	1	1	1	Insulin receptor-related protein;Insulin receptor-related protein alpha chain;Insulin receptor-related protein beta chain	INSRR	sp|P14616|INSRR_HUMAN Insulin receptor-related protein OS=Homo sapiens OX=9606 GN=INSRR PE=1 SV=2	1	1	1	1	0	0	0	0	0	1	0	0	0	0	0	1	0	0	0	0	0	1	1.2	1.2	1.2	143.72	1297	1297	0.0029449	1.3694						By MS/MS	0	0	0	0	0	1.2
J3QTA5;Q9ULD6	J3QTA5;Q9ULD6	1;1	1;1	1;1	Protein inturned	INTU	tr|J3QTA5|J3QTA5_HUMAN Protein inturned (Fragment) OS=Homo sapiens OX=9606 GN=INTU PE=1 SV=1;sp|Q9ULD6|INTU_HUMAN Protein inturned OS=Homo sapiens OX=9606 GN=INTU PE=1 SV=2	2	1	1	1	0	0	0	0	0	0	0	0	0	0	0	0	0	0	0	0	0	0	7	7	7	23.276	201	201;942	1	-2							0	0	0	0	0	0
Q8TEX9;H0YN14;H0YMR4;H0YLV0;H0YL92;H0YN07;H0YK93;H0YKG5	Q8TEX9;H0YN14	22;18;8;6;6;5;3;3	22;18;8;6;6;5;3;3	22;18;8;6;6;5;3;3	Importin-4	IPO4	sp|Q8TEX9|IPO4_HUMAN Importin-4 OS=Homo sapiens OX=9606 GN=IPO4 PE=1 SV=2;tr|H0YN14|H0YN14_HUMAN Importin-4 OS=Homo sapiens OX=9606 GN=IPO4 PE=1 SV=1	8	22	22	22	0	1	14	0	0	19	0	1	14	0	0	19	0	1	14	0	0	19	26	26	26	118.71	1081	1081;911;547;98;101;312;48;154	0	259.21		By matching	By MS/MS			By MS/MS	0	1.8	17	0	0	23.5
H0Y8C6;O00410;C9J875;C9JQT6;C9JZD8;E7ETV8;E7ESZ1;E7EWK4;E7EX05;E7EV12;E7EQT5;E7ETV3	H0Y8C6;O00410	3;3;1;1;1;1;1;1;1;1;1;1	3;3;1;1;1;1;1;1;1;1;1;1	3;3;1;1;1;1;1;1;1;1;1;1	Importin-5	IPO5	tr|H0Y8C6|H0Y8C6_HUMAN Importin-5 (Fragment) OS=Homo sapiens OX=9606 GN=IPO5 PE=1 SV=1;sp|O00410|IPO5_HUMAN Importin-5 OS=Homo sapiens OX=9606 GN=IPO5 PE=1 SV=4	12	3	3	3	0	0	2	0	0	3	0	0	2	0	0	3	0	0	2	0	0	3	4.2	4.2	4.2	123.75	1099	1099;1097;57;70;74;80;88;99;101;124;126;170	0	9.1311			By MS/MS			By MS/MS	0	0	2.4	0	0	4.2
F5H815;O15397	F5H815;O15397	1;1	1;1	1;1	Importin-8	IPO8	tr|F5H815|F5H815_HUMAN Importin-8 OS=Homo sapiens OX=9606 GN=IPO8 PE=1 SV=1;sp|O15397|IPO8_HUMAN Importin-8 OS=Homo sapiens OX=9606 GN=IPO8 PE=1 SV=2	2	1	1	1	0	0	1	0	1	1	0	0	1	0	1	1	0	0	1	0	1	1	28.6	28.6	28.6	3.9925	35	35;1037	1	-2			By MS/MS		By MS/MS	By MS/MS	0	0	28.6	0	28.6	28.6
A0A2R8Y695;A0A3B3IU98;A0A0C4DGT3;A0A2R8Y7T6;A0A3B3IRZ4;Q6DN90	A0A2R8Y695;A0A3B3IU98;A0A0C4DGT3;A0A2R8Y7T6;A0A3B3IRZ4;Q6DN90	1;1;1;1;1;1	1;1;1;1;1;1	1;1;1;1;1;1	IQ motif and SEC7 domain-containing protein 1	IQSEC1	tr|A0A2R8Y695|A0A2R8Y695_HUMAN IQ motif and SEC7 domain-containing protein 1 (Fragment) OS=Homo sapiens OX=9606 GN=IQSEC1 PE=1 SV=1;tr|A0A3B3IU98|A0A3B3IU98_HUMAN IQ motif and SEC7 domain-containing protein 1 (Fragment) OS=Homo sapiens OX=9606 GN=IQSEC1 PE	6	1	1	1	0	0	0	0	0	0	0	0	0	0	0	0	0	0	0	0	0	0	1.4	1.4	1.4	87.806	779	779;810;814;964;1222;963	0.0067061	1.0919							0	0	0	0	0	0
Q9H1B7	Q9H1B7	2	2	2	Interferon regulatory factor 2-binding protein-like	IRF2BPL	sp|Q9H1B7|I2BPL_HUMAN Probable E3 ubiquitin-protein ligase IRF2BPL OS=Homo sapiens OX=9606 GN=IRF2BPL PE=1 SV=1	1	2	2	2	0	1	1	0	0	2	0	1	1	0	0	2	0	1	1	0	0	2	3.9	3.9	3.9	82.658	796	796	0	6.6171		By MS/MS	By MS/MS			By MS/MS	0	2.5	1.4	0	0	3.9
Q86U28;J3QSS7	Q86U28;J3QSS7	2;1	2;1	2;1	Iron-sulfur cluster assembly 2 homolog, mitochondrial	ISCA2	sp|Q86U28|ISCA2_HUMAN Iron-sulfur cluster assembly 2 homolog, mitochondrial OS=Homo sapiens OX=9606 GN=ISCA2 PE=1 SV=2;tr|J3QSS7|J3QSS7_HUMAN Iron-sulfur cluster assembly 2 homolog, mitochondrial OS=Homo sapiens OX=9606 GN=ISCA2 PE=1 SV=1	2	2	2	2	0	0	1	0	0	0	0	0	1	0	0	0	0	0	1	0	0	0	20.8	20.8	20.8	16.476	154	154;108	0	18.201			By MS/MS				0	0	7.8	0	0	0
D6RGE2;Q96CN7	D6RGE2;Q96CN7	2;2	2;2	2;2	Isochorismatase domain-containing protein 1	ISOC1	tr|D6RGE2|D6RGE2_HUMAN Isochorismatase domain-containing protein 1 (Fragment) OS=Homo sapiens OX=9606 GN=ISOC1 PE=1 SV=1;sp|Q96CN7|ISOC1_HUMAN Isochorismatase domain-containing protein 1 OS=Homo sapiens OX=9606 GN=ISOC1 PE=1 SV=3	2	2	2	2	0	0	1	0	0	0	0	0	1	0	0	0	0	0	1	0	0	0	15.4	15.4	15.4	20.239	188	188;298	0.00089726	1.7814			By MS/MS				0	0	7.4	0	0	0
C9J1M4;C9J8V3;C9JJN3;C9JR71;C9JTF7;C9JP72;C9J3Y6;C9IYB9;C9K0C5;B4DGG1;Q9H0X4	C9J1M4;C9J8V3;C9JJN3;C9JR71;C9JTF7;C9JP72;C9J3Y6;C9IYB9;C9K0C5;B4DGG1;Q9H0X4	1;1;1;1;1;1;1;1;1;1;1	1;1;1;1;1;1;1;1;1;1;1	1;1;1;1;1;1;1;1;1;1;1	Protein ITFG3	ITFG3	tr|C9J1M4|C9J1M4_HUMAN Protein FAM234A (Fragment) OS=Homo sapiens OX=9606 GN=FAM234A PE=1 SV=8;tr|C9J8V3|C9J8V3_HUMAN Protein FAM234A (Fragment) OS=Homo sapiens OX=9606 GN=FAM234A PE=1 SV=8;tr|C9JJN3|C9JJN3_HUMAN Protein FAM234A (Fragment) OS=Homo sapiens	11	1	1	1	0	0	0	0	0	0	0	0	0	0	0	0	0	0	0	0	0	0	34	34	34	5.6822	50	50;68;87;102;103;131;233;236;242;531;552	1	-2							0	0	0	0	0	0
Q9UKX5	Q9UKX5	1	1	1	Integrin alpha-11	ITGA11	sp|Q9UKX5|ITA11_HUMAN Integrin alpha-11 OS=Homo sapiens OX=9606 GN=ITGA11 PE=1 SV=2	1	1	1	1	0	0	0	1	1	1	0	0	0	1	1	1	0	0	0	1	1	1	1.3	1.3	1.3	133.47	1188	1188	1	-2				By MS/MS	By MS/MS	By matching	0	0	0	1.3	1.3	1.3
Q9BY32	Q9BY32	5	5	5	Inosine triphosphate pyrophosphatase	ITPA	sp|Q9BY32|ITPA_HUMAN Inosine triphosphate pyrophosphatase OS=Homo sapiens OX=9606 GN=ITPA PE=1 SV=2	1	5	5	5	0	0	2	0	0	3	0	0	2	0	0	3	0	0	2	0	0	3	36.1	36.1	36.1	21.445	194	194	0	13.311			By MS/MS			By MS/MS	0	0	12.4	0	0	17
Q14573	Q14573	1	1	1	Inositol 1,4,5-trisphosphate receptor type 3	ITPR3	sp|Q14573|ITPR3_HUMAN Inositol 1,4,5-trisphosphate receptor type 3 OS=Homo sapiens OX=9606 GN=ITPR3 PE=1 SV=2	1	1	1	1	0	0	1	0	0	1	0	0	1	0	0	1	0	0	1	0	0	1	0.6	0.6	0.6	304.1	2671	2671	1	-2			By MS/MS			By MS/MS	0	0	0.6	0	0	0.6
Q96AA8	Q96AA8	1	1	1	Janus kinase and microtubule-interacting protein 2	JAKMIP2	sp|Q96AA8|JKIP2_HUMAN Janus kinase and microtubule-interacting protein 2 OS=Homo sapiens OX=9606 GN=JAKMIP2 PE=1 SV=1	1	1	1	1	0	1	1	1	1	1	0	1	1	1	1	1	0	1	1	1	1	1	1.9	1.9	1.9	94.933	810	810	1	-2		By MS/MS	By MS/MS	By MS/MS	By MS/MS	By MS/MS	0	1.9	1.9	1.9	1.9	1.9
H0YHH4	H0YHH4	1	1	1		KANSL2	tr|H0YHH4|H0YHH4_HUMAN KAT8 regulatory NSL complex subunit 2 (Fragment) OS=Homo sapiens OX=9606 GN=KANSL2 PE=4 SV=1	1	1	1	1	0	0	0	0	0	0	0	0	0	0	0	0	0	0	0	0	0	0	48	48	48	2.7741	25	25	0.0084583	0.99702							0	0	0	0	0	0
Q15046;H3BVA8;J3KRL2;H3BRC9;H3BPV7	Q15046;H3BVA8	6;3;2;1;1	6;3;2;1;1	6;3;2;1;1	Lysine--tRNA ligase	KARS	sp|Q15046|SYK_HUMAN Lysine--tRNA ligase OS=Homo sapiens OX=9606 GN=KARS1 PE=1 SV=3;tr|H3BVA8|H3BVA8_HUMAN Lysyl-tRNA synthetase (Fragment) OS=Homo sapiens OX=9606 GN=KARS1 PE=1 SV=1	5	6	6	6	1	0	1	0	1	3	1	0	1	0	1	3	1	0	1	0	1	3	14.4	14.4	14.4	68.047	597	597;256;102;76;104	0	31.663	By matching		By MS/MS		By matching	By MS/MS	2.7	0	2.7	0	2.7	6.9
O75449	O75449	2	2	2	Katanin p60 ATPase-containing subunit A1	KATNA1	sp|O75449|KTNA1_HUMAN Katanin p60 ATPase-containing subunit A1 OS=Homo sapiens OX=9606 GN=KATNA1 PE=1 SV=1	1	2	2	2	0	0	1	0	0	0	0	0	1	0	0	0	0	0	1	0	0	0	6.5	6.5	6.5	55.964	491	491	0	4.3896			By MS/MS				0	0	2.9	0	0	0
Q9BW62	Q9BW62	2	2	2	Katanin p60 ATPase-containing subunit A-like 1	KATNAL1	sp|Q9BW62|KATL1_HUMAN Katanin p60 ATPase-containing subunit A-like 1 OS=Homo sapiens OX=9606 GN=KATNAL1 PE=1 SV=1	1	2	2	2	0	0	1	0	0	1	0	0	1	0	0	1	0	0	1	0	0	1	5.5	5.5	5.5	55.392	490	490	0.0013239	1.636			By MS/MS			By MS/MS	0	0	1.8	0	0	3.7
Q3ZCT8	Q3ZCT8	1	1	1	Kelch repeat and BTB domain-containing protein 12	KBTBD12	sp|Q3ZCT8|KBTBC_HUMAN Kelch repeat and BTB domain-containing protein 12 OS=Homo sapiens OX=9606 GN=KBTBD12 PE=2 SV=2	1	1	1	1	1	1	0	0	1	0	1	1	0	0	1	0	1	1	0	0	1	0	2.2	2.2	2.2	71.096	623	623	1	-2	By MS/MS	By MS/MS			By MS/MS		2.2	2.2	0	0	2.2	0
C9JAA6;Q8NFY9	C9JAA6;Q8NFY9	1;1	1;1	1;1	Kelch repeat and BTB domain-containing protein 8	KBTBD8	tr|C9JAA6|C9JAA6_HUMAN Kelch repeat and BTB domain-containing protein 8 (Fragment) OS=Homo sapiens OX=9606 GN=KBTBD8 PE=1 SV=1;sp|Q8NFY9|KBTB8_HUMAN Kelch repeat and BTB domain-containing protein 8 OS=Homo sapiens OX=9606 GN=KBTBD8 PE=1 SV=2	2	1	1	1	0	0	1	0	0	1	0	0	1	0	0	1	0	0	1	0	0	1	7.5	7.5	7.5	16.382	146	146;601	0.0029586	1.384			By MS/MS			By MS/MS	0	0	7.5	0	0	7.5
Q9P0J7	Q9P0J7	1	1	1	E3 ubiquitin-protein ligase KCMF1	KCMF1	sp|Q9P0J7|KCMF1_HUMAN E3 ubiquitin-protein ligase KCMF1 OS=Homo sapiens OX=9606 GN=KCMF1 PE=1 SV=2	1	1	1	1	0	0	0	0	0	0	0	0	0	0	0	0	0	0	0	0	0	0	4.7	4.7	4.7	41.945	381	381	1	-2							0	0	0	0	0	0
A8MYU2	A8MYU2	1	1	1	Potassium channel subfamily U member 1	KCNU1	sp|A8MYU2|KCNU1_HUMAN Potassium channel subfamily U member 1 OS=Homo sapiens OX=9606 GN=KCNU1 PE=1 SV=2	1	1	1	1	0	0	0	1	0	0	0	0	0	1	0	0	0	0	0	1	0	0	1.6	1.6	1.6	129.54	1149	1149	1	-2				By MS/MS			0	0	0	1.6	0	0
A0A087WX35;Q8N5Z5	A0A087WX35;Q8N5Z5	1;1	1;1	1;1	BTB/POZ domain-containing protein KCTD17	KCTD17	tr|A0A087WX35|A0A087WX35_HUMAN BTB/POZ domain-containing protein KCTD17 OS=Homo sapiens OX=9606 GN=KCTD17 PE=1 SV=1;sp|Q8N5Z5|KCD17_HUMAN BTB/POZ domain-containing protein KCTD17 OS=Homo sapiens OX=9606 GN=KCTD17 PE=1 SV=3	2	1	1	1	0	0	0	0	0	0	0	0	0	0	0	0	0	0	0	0	0	0	5.5	5.5	5.5	24.772	220	220;321	0.0092025	0.98508							0	0	0	0	0	0
Q8NC69;F5H7I0	Q8NC69	3;1	3;1	3;1	BTB/POZ domain-containing protein KCTD6	KCTD6	sp|Q8NC69|KCTD6_HUMAN BTB/POZ domain-containing protein KCTD6 OS=Homo sapiens OX=9606 GN=KCTD6 PE=1 SV=2	2	3	3	3	0	0	1	0	0	2	0	0	1	0	0	2	0	0	1	0	0	2	14.3	14.3	14.3	27.61	237	237;74	0	11.042			By MS/MS			By MS/MS	0	0	6.8	0	0	14.3
O60341;R4GMQ1;R4GMP9	O60341;R4GMQ1	3;3;1	3;3;1	3;3;1	Lysine-specific histone demethylase 1A	KDM1A	sp|O60341|KDM1A_HUMAN Lysine-specific histone demethylase 1A OS=Homo sapiens OX=9606 GN=KDM1A PE=1 SV=2;tr|R4GMQ1|R4GMQ1_HUMAN Lysine-specific histone demethylase OS=Homo sapiens OX=9606 GN=KDM1A PE=1 SV=2	3	3	3	3	0	0	3	0	0	2	0	0	3	0	0	2	0	0	3	0	0	2	4.2	4.2	4.2	92.902	852	852;858;301	0	4.0457			By MS/MS			By MS/MS	0	0	4.2	0	0	2.5
H0Y6H0;Q8NB78	H0Y6H0;Q8NB78	1;1	1;1	1;1	Lysine-specific histone demethylase 1B	KDM1B	tr|H0Y6H0|H0Y6H0_HUMAN Lysine-specific histone demethylase 1B OS=Homo sapiens OX=9606 GN=KDM1B PE=1 SV=2;sp|Q8NB78|KDM1B_HUMAN Lysine-specific histone demethylase 1B OS=Homo sapiens OX=9606 GN=KDM1B PE=1 SV=3	2	1	1	1	0	0	1	0	0	1	0	0	1	0	0	1	0	0	1	0	0	1	1.5	1.5	1.5	92.225	823	823;822	0.0025918	1.4987			By MS/MS			By MS/MS	0	0	1.5	0	0	1.5
K7EQ54;A0A0C4DFL8;F5GX28;O94953	K7EQ54;A0A0C4DFL8;F5GX28;O94953	1;1;1;1	1;1;1;1	1;1;1;1	Lysine-specific demethylase 4B	KDM4B	tr|K7EQ54|K7EQ54_HUMAN Lysine-specific demethylase 4B (Fragment) OS=Homo sapiens OX=9606 GN=KDM4B PE=1 SV=2;tr|A0A0C4DFL8|A0A0C4DFL8_HUMAN [Histone H3]-trimethyl-L-lysine(9) demethylase OS=Homo sapiens OX=9606 GN=KDM4B PE=1 SV=1;tr|F5GX28|F5GX28_HUMAN [His	4	1	1	1	1	1	0	1	1	0	1	1	0	1	1	0	1	1	0	1	1	0	2.2	2.2	2.2	68.508	623	623;1096;1130;1096	0.0033543	1.3415	By MS/MS	By MS/MS		By MS/MS	By matching		2.2	2.2	0	2.2	2.2	0
Q14145;K7ESE0;K7EQX2;K7EJ49;K7EJD8;K7EPZ3	Q14145	8;3;2;2;2;1	8;3;2;2;2;1	8;3;2;2;2;1	Kelch-like ECH-associated protein 1	KEAP1	sp|Q14145|KEAP1_HUMAN Kelch-like ECH-associated protein 1 OS=Homo sapiens OX=9606 GN=KEAP1 PE=1 SV=2	6	8	8	8	0	0	2	0	0	2	0	0	2	0	0	2	0	0	2	0	0	2	14.6	14.6	14.6	69.666	624	624;279;172;212;213;116	0	13.72			By MS/MS			By MS/MS	0	0	5	0	0	3.7
J3KN16;Q5VYK3	J3KN16;Q5VYK3	1;1	1;1	1;1	Proteasome-associated protein ECM29 homolog	KIAA0368;ECM29	tr|J3KN16|J3KN16_HUMAN Proteasome adapter and scaffold protein ECM29 OS=Homo sapiens OX=9606 GN=ECPAS PE=1 SV=1;sp|Q5VYK3|ECM29_HUMAN Proteasome adapter and scaffold protein ECM29 OS=Homo sapiens OX=9606 GN=ECPAS PE=1 SV=2	2	1	1	1	0	0	0	0	0	0	0	0	0	0	0	0	0	0	0	0	0	0	0.6	0.6	0.6	223.69	2017	2017;1845	0.0091813	0.97756							0	0	0	0	0	0
O15091	O15091	1	1	1	Mitochondrial ribonuclease P protein 3	KIAA0391	sp|O15091|MRPP3_HUMAN Mitochondrial ribonuclease P catalytic subunit OS=Homo sapiens OX=9606 GN=PRORP PE=1 SV=2	1	1	1	1	1	1	0	1	1	0	1	1	0	1	1	0	1	1	0	1	1	0	2.2	2.2	2.2	67.315	583	583	0.0052483	1.1934	By matching	By matching		By matching	By MS/MS		2.2	2.2	0	2.2	2.2	0
Q8IV33	Q8IV33	1	1	1	Uncharacterized protein KIAA0825	KIAA0825	sp|Q8IV33|K0825_HUMAN Uncharacterized protein KIAA0825 OS=Homo sapiens OX=9606 GN=KIAA0825 PE=1 SV=3	1	1	1	1	0	0	0	0	0	1	0	0	0	0	0	1	0	0	0	0	0	1	0.9	0.9	0.9	147.73	1275	1275	1	-2						By matching	0	0	0	0	0	0.9
C9JWZ6;E9PE22	C9JWZ6;E9PE22	1;1	1;1	1;1		KIAA0895	tr|C9JWZ6|C9JWZ6_HUMAN Uncharacterized protein KIAA0895 (Fragment) OS=Homo sapiens OX=9606 GN=KIAA0895 PE=4 SV=1;tr|E9PE22|E9PE22_HUMAN Uncharacterized protein KIAA0895 OS=Homo sapiens OX=9606 GN=KIAA0895 PE=4 SV=1	2	1	1	1	0	0	0	0	0	1	0	0	0	0	0	1	0	0	0	0	0	1	13.4	13.4	13.4	11.088	97	97;275	1	-2						By MS/MS	0	0	0	0	0	13.4
Q7Z7F0	Q7Z7F0	1	1	1	UPF0469 protein KIAA0907	KIAA0907	sp|Q7Z7F0|KHDC4_HUMAN KH homology domain-containing protein 4 OS=Homo sapiens OX=9606 GN=KHDC4 PE=1 SV=1	1	1	1	1	0	1	0	0	1	0	0	1	0	0	1	0	0	1	0	0	1	0	2	2	2	64.845	614	614	1	-2		By MS/MS			By MS/MS		0	2	0	0	2	0
Q6ICG6;B0QY18;B0QY20;B0QY16;H7C1U5;V9GYW7;V9GZ62	Q6ICG6;B0QY18;B0QY20;B0QY16	4;2;2;2;1;1;1	4;2;2;2;1;1;1	4;2;2;2;1;1;1	Uncharacterized protein KIAA0930	KIAA0930	sp|Q6ICG6|K0930_HUMAN Uncharacterized protein KIAA0930 OS=Homo sapiens OX=9606 GN=KIAA0930 PE=1 SV=1;tr|B0QY18|B0QY18_HUMAN Uncharacterized protein KIAA0930 (Fragment) OS=Homo sapiens OX=9606 GN=KIAA0930 PE=1 SV=1;tr|B0QY20|B0QY20_HUMAN Uncharacterized pro	7	4	4	4	1	1	1	1	2	1	1	1	1	1	2	1	1	1	1	1	2	1	11.6	11.6	11.6	45.794	404	404;136;152;289;70;85;89	0	2.5196	By matching	By matching	By MS/MS	By MS/MS	By MS/MS	By MS/MS	3.2	2.2	2.2	3.2	5.4	2.2
Q5T5P2;A0A0U1RRK8;Q5T5P0;Q5T5P1	Q5T5P2;A0A0U1RRK8;Q5T5P0;Q5T5P1	2;1;1;1	2;1;1;1	2;1;1;1	Sickle tail protein homolog	KIAA1217	sp|Q5T5P2|SKT_HUMAN Sickle tail protein homolog OS=Homo sapiens OX=9606 GN=KIAA1217 PE=1 SV=2;tr|A0A0U1RRK8|A0A0U1RRK8_HUMAN Sickle tail protein homolog (Fragment) OS=Homo sapiens OX=9606 GN=KIAA1217 PE=1 SV=1;tr|Q5T5P0|Q5T5P0_HUMAN Sickle tail protein hom	4	2	2	2	1	1	0	1	0	1	1	1	0	1	0	1	1	1	0	1	0	1	1.5	1.5	1.5	214.11	1943	1943;453;783;933	0.0033571	1.3436	By matching	By matching		By MS/MS		By MS/MS	1.1	1.1	0	1.1	0	0.4
Q96MC4	Q96MC4	1	1	1	Protein DDC8 homolog	KIAA1731NL	sp|Q96MC4|C295L_HUMAN CEP295 N-terminal-like protein OS=Homo sapiens OX=9606 GN=CEP295NL PE=2 SV=1	1	1	1	1	0	0	0	0	0	1	0	0	0	0	0	1	0	0	0	0	0	1	2.4	2.4	2.4	69.838	621	621	0.0059618	1.1308						By MS/MS	0	0	0	0	0	2.4
Q5HYC2	Q5HYC2	1	1	1	Uncharacterized protein KIAA2026	KIAA2026	sp|Q5HYC2|K2026_HUMAN Uncharacterized protein KIAA2026 OS=Homo sapiens OX=9606 GN=KIAA2026 PE=2 SV=2	1	1	1	1	0	1	0	0	0	0	0	1	0	0	0	0	0	1	0	0	0	0	0.7	0.7	0.7	228.08	2103	2103	1	-2		By MS/MS					0	0.7	0	0	0	0
A0A7I2V3A9;P52732;A0A7I2V3V3;A0A7I2YQY4	A0A7I2V3A9;P52732;A0A7I2V3V3;A0A7I2YQY4	3;3;2;2	3;3;2;2	3;3;2;2	Kinesin-like protein KIF11	KIF11	tr|A0A7I2V3A9|A0A7I2V3A9_HUMAN Kinesin-like protein OS=Homo sapiens OX=9606 GN=KIF11 PE=1 SV=1;sp|P52732|KIF11_HUMAN Kinesin-like protein KIF11 OS=Homo sapiens OX=9606 GN=KIF11 PE=1 SV=2;tr|A0A7I2V3V3|A0A7I2V3V3_HUMAN Kinesin-like protein OS=Homo sapiens O	4	3	3	3	0	1	1	1	0	1	0	1	1	1	0	1	0	1	1	1	0	1	5.4	5.4	5.4	111.51	987	987;1056;533;673	0	4.5459		By MS/MS	By MS/MS	By matching		By matching	0	1.3	1.4	1.3	0	2.6
Q9NQT8;E7ERX9	Q9NQT8;E7ERX9	4;2	4;2	4;2	Kinesin-like protein KIF13B;Kinesin-like protein	KIF13B	sp|Q9NQT8|KI13B_HUMAN Kinesin-like protein KIF13B OS=Homo sapiens OX=9606 GN=KIF13B PE=1 SV=2;tr|E7ERX9|E7ERX9_HUMAN Kinesin-like protein OS=Homo sapiens OX=9606 GN=KIF13B PE=1 SV=1	2	4	4	4	1	2	0	2	2	0	1	2	0	2	2	0	1	2	0	2	2	0	2.4	2.4	2.4	202.79	1826	1826;743	0	3.675	By MS/MS	By MS/MS		By MS/MS	By MS/MS		0.9	1.6	0	1.6	1.6	0
Q15058	Q15058	1	1	1	Kinesin-like protein KIF14	KIF14	sp|Q15058|KIF14_HUMAN Kinesin-like protein KIF14 OS=Homo sapiens OX=9606 GN=KIF14 PE=1 SV=1	1	1	1	1	1	1	1	1	0	1	1	1	1	1	0	1	1	1	1	1	0	1	1.3	1.3	1.3	186.49	1648	1648	1	-2	By MS/MS	By MS/MS	By MS/MS	By MS/MS		By MS/MS	1.3	1.3	1.3	1.3	0	1.3
A0A1B0GTU3;Q96L93	A0A1B0GTU3;Q96L93	2;2	2;2	2;2	Kinesin-like protein KIF16B	KIF16B	tr|A0A1B0GTU3|A0A1B0GTU3_HUMAN Kinesin-like protein KIF16B OS=Homo sapiens OX=9606 GN=KIF16B PE=1 SV=1;sp|Q96L93|KI16B_HUMAN Kinesin-like protein KIF16B OS=Homo sapiens OX=9606 GN=KIF16B PE=1 SV=2	2	2	2	2	1	1	0	1	0	0	1	1	0	1	0	0	1	1	0	1	0	0	1.7	1.7	1.7	146.32	1266	1266;1317	0.0045249	1.2568	By MS/MS	By matching		By MS/MS			0.6	0.6	0	0.6	0	0
Q2TAC6	Q2TAC6	1	1	1	Kinesin-like protein KIF19	KIF19	sp|Q2TAC6|KIF19_HUMAN Kinesin-like protein KIF19 OS=Homo sapiens OX=9606 GN=KIF19 PE=2 SV=2	1	1	1	1	1	1	0	1	1	0	1	1	0	1	1	0	1	1	0	1	1	0	2.5	2.5	2.5	111.33	998	998	0.00046447	2.0231	By MS/MS	By MS/MS		By MS/MS	By matching		2.5	2.5	0	2.5	2.5	0
Q96Q89	Q96Q89	1	1	1	Kinesin-like protein KIF20B	KIF20B	sp|Q96Q89|KI20B_HUMAN Kinesin-like protein KIF20B OS=Homo sapiens OX=9606 GN=KIF20B PE=1 SV=3	1	1	1	1	0	0	1	0	0	0	0	0	1	0	0	0	0	0	1	0	0	0	0.6	0.6	0.6	210.63	1820	1820	1	-2			By MS/MS				0	0	0.6	0	0	0
B7ZC32	B7ZC32	1	1	1	Kinesin-like protein KIF28P	KIF28P	sp|B7ZC32|KIF28_HUMAN Kinesin-like protein KIF28P OS=Homo sapiens OX=9606 GN=KIF28P PE=3 SV=2	1	1	1	1	1	1	0	1	1	0	1	1	0	1	1	0	1	1	0	1	1	0	1.4	1.4	1.4	108.25	967	967	1	-2	By MS/MS	By MS/MS		By MS/MS	By MS/MS		1.4	1.4	0	1.4	1.4	0
A0A6Q8PGH7;A0A6Q8PFA6;A0A6Q8PG37;A0A6Q8PH57;O00139;D6R9M0;A0A6Q8PGG1;H0Y8H2	A0A6Q8PGH7;A0A6Q8PFA6;A0A6Q8PG37;A0A6Q8PH57;O00139;D6R9M0;A0A6Q8PGG1	4;4;4;4;4;3;2;1	4;4;4;4;4;3;2;1	4;4;4;4;4;3;2;1	Kinesin-like protein KIF2A	KIF2A	tr|A0A6Q8PGH7|A0A6Q8PGH7_HUMAN Kinesin-like protein (Fragment) OS=Homo sapiens OX=9606 GN=KIF2A PE=1 SV=1;tr|A0A6Q8PFA6|A0A6Q8PFA6_HUMAN Kinesin-like protein OS=Homo sapiens OX=9606 GN=KIF2A PE=1 SV=1;tr|A0A6Q8PG37|A0A6Q8PG37_HUMAN Kinesin-like protein OS=	8	4	4	4	0	0	3	0	0	3	0	0	3	0	0	3	0	0	3	0	0	3	6.4	6.4	6.4	77.657	685	685;687;717;725;706;519;590;130	0	5.4258			By MS/MS			By MS/MS	0	0	5	0	0	5
A0A0G2JMZ6;O60282;A0A7I2V492;A0A7I2V3N5;A0A7I2V581;A0A7I2V4K6;A0A6Q8PEZ8;J3KNA1;Q12840;A0A6Q8PGJ3;A0A7I2V3V4;A0A7I2V352;A0A7I2YQQ7;A0A7I2YQB4;A0A6Q8PGN1;A0A6Q8PGG7;A0A6Q8PGT2	A0A0G2JMZ6;O60282;A0A7I2V492;A0A7I2V3N5;A0A7I2V581;A0A7I2V4K6;A0A6Q8PEZ8;J3KNA1;Q12840;A0A6Q8PGJ3;A0A7I2V3V4	7;7;7;7;7;6;6;6;6;6;5;3;3;2;2;1;1	2;2;2;2;2;2;1;1;1;1;2;1;1;1;0;0;0	2;2;2;2;2;2;1;1;1;1;2;1;1;1;0;0;0	Kinesin heavy chain isoform 5C;Kinesin-like protein;Kinesin heavy chain isoform 5A	KIF5C;KIF5A	tr|A0A0G2JMZ6|A0A0G2JMZ6_HUMAN Kinesin-like protein (Fragment) OS=Homo sapiens OX=9606 GN=KIF5C PE=1 SV=1;sp|O60282|KIF5C_HUMAN Kinesin heavy chain isoform 5C OS=Homo sapiens OX=9606 GN=KIF5C PE=1 SV=1;tr|A0A7I2V492|A0A7I2V492_HUMAN Kinesin-like protein OS	17	7	2	2	0	0	3	0	0	5	0	0	1	0	0	1	0	0	1	0	0	1	9.7	3.1	3.1	98.679	860	860;957;956;934;933;896;997;943;1032;1039;699;509;508;74;103;134;38	0	7.5304			By matching			By matching	0	0	4.8	0	0	7.4
Q2M1P5	Q2M1P5	2	2	2	Kinesin-like protein KIF7	KIF7	sp|Q2M1P5|KIF7_HUMAN Kinesin-like protein KIF7 OS=Homo sapiens OX=9606 GN=KIF7 PE=1 SV=2	1	2	2	2	0	0	0	0	1	1	0	0	0	0	1	1	0	0	0	0	1	1	2.4	2.4	2.4	150.59	1343	1343	0.00047529	2.1606					By matching	By MS/MS	0	0	0	0	1.5	0.9
A0A087WX12;A0A087X032;A0A087WTH3;A0A087X251;A0A087X0T6;Q2M2Z5	A0A087WX12;A0A087X032;A0A087WTH3;A0A087X251;A0A087X0T6;Q2M2Z5	1;1;1;1;1;1	1;1;1;1;1;1	1;1;1;1;1;1	Centrosomal protein kizuna	KIZ	tr|A0A087WX12|A0A087WX12_HUMAN Centrosomal protein kizuna (Fragment) OS=Homo sapiens OX=9606 GN=KIZ PE=1 SV=1;tr|A0A087X032|A0A087X032_HUMAN Centrosomal protein kizuna (Fragment) OS=Homo sapiens OX=9606 GN=KIZ PE=1 SV=1;tr|A0A087WTH3|A0A087WTH3_HUMAN Centr	6	1	1	1	0	0	1	0	1	1	0	0	1	0	1	1	0	0	1	0	1	1	4.7	4.7	4.7	49.225	450	450;521;538;624;624;673	0	2.402			By MS/MS		By matching	By MS/MS	0	0	4.7	0	4.7	4.7
G5E9S8;G3V2E7;F8W6L3;G3V3H3;G3V5R9;E7EVH7;Q07866	G5E9S8;G3V2E7;F8W6L3;G3V3H3;G3V5R9;E7EVH7;Q07866	6;6;6;6;6;6;6	2;2;2;2;2;2;2	2;2;2;2;2;2;2	Kinesin light chain 1	KLC1	tr|G5E9S8|G5E9S8_HUMAN Kinesin light chain OS=Homo sapiens OX=9606 GN=KLC1 PE=1 SV=1;tr|G3V2E7|G3V2E7_HUMAN Kinesin light chain OS=Homo sapiens OX=9606 GN=KLC1 PE=1 SV=1;tr|F8W6L3|F8W6L3_HUMAN Kinesin light chain OS=Homo sapiens OX=9606 GN=KLC1 PE=1 SV=1;t	7	6	2	2	0	0	2	0	0	3	0	0	1	0	0	2	0	0	1	0	0	2	11.1	2.7	2.7	62.506	549	549;551;576;609;630;719;573	0	3.7348			By MS/MS			By MS/MS	0	0	6.4	0	0	6.7
Q9H0B6;A8MZ87;E9PQ02;A8MX29;E9PI24;E9PP09;C9JHT2;E9PM83	Q9H0B6;A8MZ87	7;5;3;3;1;1;1;1	7;5;3;3;1;1;1;1	3;1;1;1;1;1;1;1	Kinesin light chain 2	KLC2	sp|Q9H0B6|KLC2_HUMAN Kinesin light chain 2 OS=Homo sapiens OX=9606 GN=KLC2 PE=1 SV=1;tr|A8MZ87|A8MZ87_HUMAN Kinesin light chain OS=Homo sapiens OX=9606 GN=KLC2 PE=1 SV=1	8	7	7	3	0	0	2	0	0	2	0	0	2	0	0	2	0	0	1	0	0	1	14.5	14.5	7.1	68.934	622	622;521;189;333;105;145;166;171	0	12.196			By MS/MS			By MS/MS	0	0	5.8	0	0	5.8
Q6PID8	Q6PID8	1	1	1	Kelch domain-containing protein 10	KLHDC10	sp|Q6PID8|KLD10_HUMAN Kelch domain-containing protein 10 OS=Homo sapiens OX=9606 GN=KLHDC10 PE=1 SV=1	1	1	1	1	0	0	1	0	0	1	0	0	1	0	0	1	0	0	1	0	0	1	3.4	3.4	3.4	49.097	442	442	0.0029699	1.4022			By MS/MS			By MS/MS	0	0	3.4	0	0	3.4
F8VZY9;P05783	F8VZY9;P05783	4;4	2;2	1;1	Keratin, type I cytoskeletal 18	KRT18	tr|F8VZY9|F8VZY9_HUMAN Keratin, type I cytoskeletal 18 OS=Homo sapiens OX=9606 GN=KRT18 PE=1 SV=1;sp|P05783|K1C18_HUMAN Keratin, type I cytoskeletal 18 OS=Homo sapiens OX=9606 GN=KRT18 PE=1 SV=2	2	4	2	1	2	2	2	2	3	2	0	0	1	0	1	0	0	0	0	0	1	0	15.1	11	7.9	43.774	391	391;430	0	53.45	By matching	By matching	By MS/MS	By matching	By MS/MS	By matching	4.1	4.1	5.4	4.1	12	4.1
CON__P19001;P19001	CON__P19001;P19001	9;9	1;1	1;1	Keratin, type I cytoskeletal 19	Krt19	;P19001 SWISS-PROT:P19001 Tax_Id=10090 Gene_Symbol=Krt19 Keratin, type I cytoskeletal 19	2	9	1	1	6	5	3	5	6	7	0	0	0	0	0	1	0	0	0	0	0	1	16.1	4.7	4.7	44.541	403	403;403	0	3.7645	By matching	By matching	By matching	By matching	By matching	By MS/MS	11.4	8.4	7.4	8.4	11.4	13.2
CON__Q6IFX2;Q6IFX2	CON__Q6IFX2;Q6IFX2	17;17	1;1	1;1	Keratin, type I cytoskeletal 42	Krt42	;Q6IFX2 SWISS-PROT:Q6IFX2 Tax_Id=10090 Gene_Symbol=Krt42 Keratin, type I cytoskeletal 42	2	17	1	1	9	5	7	9	8	12	0	1	0	1	0	0	0	1	0	1	0	0	29.4	3.8	3.8	50.133	452	452;452	0.0044953	1.2261	By matching	By MS/MS	By matching	By MS/MS	By matching	By matching	18.4	12.4	17.7	17.5	18.4	21.7
CON__P02538;P02538;CON__O95678;O95678;CON__Q8VED5;Q8VED5;P07744;CON__P07744;CON__Q32MB2;F8W1S1;Q86Y46;Q32MB2;Q7RTS7;CON__Q7RTS7;P19013;Q14CN4-1;CON__Q3SY84;Q14CN4;CON__Q14CN4-1;Q3SY84;CON__P19013;CON__H-INV:HIT000016045;H-INV:HIT000016045;F8VP67;REFSEQ:XP_932229;CON__REFSEQ:XP_932229;F8VS61;H0YIC5;H0YHD9	CON__P02538;P02538	46;46;14;14;9;9;8;8;3;3;3;3;3;3;2;2;2;2;2;2;2;1;1;1;1;1;1;1;1	2;2;1;1;1;1;1;1;0;0;0;0;0;0;0;0;0;0;0;0;0;0;0;0;0;0;0;0;0	1;1;0;0;0;0;0;0;0;0;0;0;0;0;0;0;0;0;0;0;0;0;0;0;0;0;0;0;0	Keratin, type II cytoskeletal 6A	KRT6A	;sp|P02538|K2C6A_HUMAN Keratin, type II cytoskeletal 6A OS=Homo sapiens OX=9606 GN=KRT6A PE=1 SV=3	29	46	2	1	21	18	14	14	14	22	0	1	0	0	0	1	0	1	0	0	0	0	64	3.9	1.8	60.044	564	564;564;551;551;531;531;525;525;540;543;540;540;529;529;520;511;523;511;511;523;594;99;99;113;345;345;248;285;143	0	2.6383	By matching	By MS/MS	By matching	By matching	By matching	By MS/MS	37.2	36.5	30.1	28	26.6	36.3
CON__P04259;P04259	CON__P04259;P04259	47;47	3;3	2;2	Keratin, type II cytoskeletal 6B	KRT6B	;P04259 SWISS-PROT:P04259 Tax_Id=9606 Gene_Symbol=KRT6B Keratin, type II cytoskeletal 6B	2	47	3	2	23	21	14	15	16	22	2	2	0	0	0	0	2	2	0	0	0	0	63.8	8.9	4.6	59.998	564	564;564	0	27.047	By MS/MS	By MS/MS	By matching	By matching	By matching	By matching	42.7	40.2	28	31.9	32.3	35.1
Q3KNV1;CON__Q3KNV1;CON__P08729;P08729	Q3KNV1;CON__Q3KNV1;CON__P08729;P08729	6;6;6;6	1;1;1;1	1;1;1;1	Keratin, type II cytoskeletal 7	KRT7	Q3KNV1 TREMBL:Q3KNV1;Q96GE1 Tax_Id=9606 Gene_Symbol=KRT7 keratin 7;;;sp|P08729|K2C7_HUMAN Keratin, type II cytoskeletal 7 OS=Homo sapiens OX=9606 GN=KRT7 PE=1 SV=5	4	6	1	1	2	1	3	2	2	4	0	0	0	0	0	0	0	0	0	0	0	0	9.4	4.7	4.7	51.385	469	469;469;469;469	0.0077942	1.0572	By matching	By matching	By matching	By matching	By matching	By matching	3	3	3	3	3	4.7
CON__Q7Z794;Q7Z794	CON__Q7Z794;Q7Z794	4;4	1;1	1;1	Keratin, type II cytoskeletal 1b	KRT77	;Q7Z794 SWISS-PROT:Q7Z794 Tax_Id=9606 Gene_Symbol=KRT77 Keratin 77	2	4	1	1	3	1	3	2	2	3	1	0	0	0	0	0	1	0	0	0	0	0	7.4	3.8	3.8	61.802	578	578;578	1	-2	By matching	By matching	By matching	By matching	By matching	By matching	7.4	2.1	3.6	3.6	3.6	3.6
CON__Q8N1N4-2;CON__Q7RTT2;Q8N1N4;Q8N1N4-2;Q7RTT2	CON__Q8N1N4-2;CON__Q7RTT2;Q8N1N4;Q8N1N4-2;Q7RTT2	7;7;7;7;7	5;5;5;5;5	5;5;5;5;5	Keratin, type II cytoskeletal 78	KRT78	;;sp|Q8N1N4|K2C78_HUMAN Keratin, type II cytoskeletal 78 OS=Homo sapiens OX=9606 GN=KRT78 PE=1 SV=2;Q8N1N4-2 SWISS-PROT:Q8N1N4-2 Tax_Id=9606 Gene_Symbol=KRT78 Isoform 2 of Keratin, type II cytoskeletal 78;Q7RTT2 TREMBL:Q7RTT2 Tax_Id=9606 Gene_Symbol=KRT78	5	7	5	5	2	4	3	2	1	4	1	3	3	1	0	3	1	3	3	1	0	3	15.4	11.5	11.5	56.964	521	521;521;520;521;521	0	5.2051	By MS/MS	By MS/MS	By MS/MS	By matching	By matching	By MS/MS	3.3	8.1	7.3	3.8	1.5	9.6
CON__Q9NSB4;Q9NSB4	CON__Q9NSB4;Q9NSB4	1;1	1;1	1;1	Keratin, type II cuticular Hb2	KRT82	;sp|Q9NSB4|KRT82_HUMAN Keratin, type II cuticular Hb2 OS=Homo sapiens OX=9606 GN=KRT82 PE=1 SV=3	2	1	1	1	0	0	1	0	0	0	0	0	1	0	0	0	0	0	1	0	0	0	1.8	1.8	1.8	56.682	513	513;513	0	2.9303			By MS/MS				0	0	1.8	0	0	0
Q86UP2;G3V4Y7;B7Z6P3;G3V5P0;G3V5G2;H0YJZ8;H0YJP2	Q86UP2;G3V4Y7	18;11;6;5;3;2;1	18;11;6;5;3;2;1	18;11;6;5;3;2;1	Kinectin	KTN1	sp|Q86UP2|KTN1_HUMAN Kinectin OS=Homo sapiens OX=9606 GN=KTN1 PE=1 SV=1;tr|G3V4Y7|G3V4Y7_HUMAN Kinectin OS=Homo sapiens OX=9606 GN=KTN1 PE=1 SV=1	7	18	18	18	0	1	9	2	0	7	0	1	9	2	0	7	0	1	9	2	0	7	19.7	19.7	19.7	156.27	1357	1357;595;334;160;162;153;138	0	38.902		By MS/MS	By MS/MS	By matching		By MS/MS	0	1.2	9.1	2.6	0	6.2
Q9UN81	Q9UN81	1	1	1	LINE-1 retrotransposable element ORF1 protein	L1RE1	sp|Q9UN81|LORF1_HUMAN LINE-1 retrotransposable element ORF1 protein OS=Homo sapiens OX=9606 GN=L1RE1 PE=1 SV=1	1	1	1	1	0	1	0	1	1	0	0	1	0	1	1	0	0	1	0	1	1	0	3.3	3.3	3.3	40.055	338	338	0.0041528	1.303		By MS/MS		By MS/MS	By MS/MS		0	3.3	0	3.3	3.3	0
Q96EM0;D6RC46;E9PKK7	Q96EM0	5;2;2	5;2;2	5;2;2	Trans-3-hydroxy-L-proline dehydratase	L3HYPDH	sp|Q96EM0|T3HPD_HUMAN Trans-3-hydroxy-L-proline dehydratase OS=Homo sapiens OX=9606 GN=L3HYPDH PE=1 SV=2	3	5	5	5	0	0	5	0	0	5	0	0	5	0	0	5	0	0	5	0	0	5	20.1	20.1	20.1	38.137	354	354;142;145	0	12.689			By MS/MS			By MS/MS	0	0	20.1	0	0	20.1
Q53H82	Q53H82	1	1	1	Beta-lactamase-like protein 2	LACTB2	sp|Q53H82|LACB2_HUMAN Endoribonuclease LACTB2 OS=Homo sapiens OX=9606 GN=LACTB2 PE=1 SV=2	1	1	1	1	0	0	0	0	0	1	0	0	0	0	0	1	0	0	0	0	0	1	3.8	3.8	3.8	32.805	288	288	0.00777	1.046						By MS/MS	0	0	0	0	0	3.8
O15230	O15230	1	1	1	Laminin subunit alpha-5	LAMA5	sp|O15230|LAMA5_HUMAN Laminin subunit alpha-5 OS=Homo sapiens OX=9606 GN=LAMA5 PE=1 SV=8	1	1	1	1	1	0	0	0	1	0	1	0	0	0	1	0	1	0	0	0	1	0	0.4	0.4	0.4	399.73	3695	3695	0.0095274	0.96656	By MS/MS				By MS/MS		0.4	0	0	0	0.4	0
G3XAI2;A0A7I2V4J9;P07942	G3XAI2;A0A7I2V4J9;P07942	1;1;1	1;1;1	1;1;1	Laminin subunit beta-1	LAMB1	tr|G3XAI2|G3XAI2_HUMAN Laminin subunit beta-1 OS=Homo sapiens OX=9606 GN=LAMB1 PE=1 SV=2;tr|A0A7I2V4J9|A0A7I2V4J9_HUMAN Laminin subunit beta-1 OS=Homo sapiens OX=9606 GN=LAMB1 PE=1 SV=1;sp|P07942|LAMB1_HUMAN Laminin subunit beta-1 OS=Homo sapiens OX=9606 G	3	1	1	1	1	0	0	0	1	0	1	0	0	0	1	0	1	0	0	0	1	0	0.8	0.8	0.8	182.59	1649	1649;1682;1786	0.00045956	1.9202	By matching				By matching		0.8	0	0	0	0.8	0
F5GX19;F5H3Y3;Q6IAA8;H0YFI1;F5H479	F5GX19;F5H3Y3;Q6IAA8;H0YFI1;F5H479	2;2;2;1;1	2;2;2;1;1	2;2;2;1;1	Ragulator complex protein LAMTOR1	LAMTOR1	tr|F5GX19|F5GX19_HUMAN Late endosomal/lysosomal adaptor and MAPK and MTOR activator 1 OS=Homo sapiens OX=9606 GN=LAMTOR1 PE=1 SV=1;tr|F5H3Y3|F5H3Y3_HUMAN Late endosomal/lysosomal adaptor and MAPK and MTOR activator 1 OS=Homo sapiens OX=9606 GN=LAMTOR1 PE=1	5	2	2	2	0	0	2	0	0	1	0	0	2	0	0	1	0	0	2	0	0	1	17.6	17.6	17.6	15.687	142	142;160;161;79;99	0.0004662	2.0422			By MS/MS			By MS/MS	0	0	17.6	0	0	9.2
Q9UHA4	Q9UHA4	3	3	3	Ragulator complex protein LAMTOR3	LAMTOR3	sp|Q9UHA4|LTOR3_HUMAN Ragulator complex protein LAMTOR3 OS=Homo sapiens OX=9606 GN=LAMTOR3 PE=1 SV=1	1	3	3	3	0	1	2	1	1	2	0	1	2	1	1	2	0	1	2	1	1	2	49.2	49.2	49.2	13.623	124	124	0	9.8625		By MS/MS	By MS/MS	By MS/MS	By MS/MS	By MS/MS	0	8.1	41.1	8.1	8.1	41.1
R4GMU8;E9PLX3;A0A0C4DGV4;O43504	R4GMU8;E9PLX3;A0A0C4DGV4;O43504	1;1;1;1	1;1;1;1	1;1;1;1	Ragulator complex protein LAMTOR5	LAMTOR5	tr|R4GMU8|R4GMU8_HUMAN Late endosomal/lysosomal adaptor and MAPK and MTOR activator 5 OS=Homo sapiens OX=9606 GN=LAMTOR5 PE=1 SV=1;tr|E9PLX3|E9PLX3_HUMAN Late endosomal/lysosomal adaptor and MAPK and MTOR activator 5 OS=Homo sapiens OX=9606 GN=LAMTOR5 PE=1	4	1	1	1	0	0	1	0	0	0	0	0	1	0	0	0	0	0	1	0	0	0	25.3	25.3	25.3	8.2153	79	79;90;173;91	0	5.1484			By MS/MS				0	0	25.3	0	0	0
O43813;E9PHS0;F8WDS9	O43813;E9PHS0;F8WDS9	3;3;2	3;3;2	3;3;2	LanC-like protein 1	LANCL1	sp|O43813|LANC1_HUMAN Glutathione S-transferase LANCL1 OS=Homo sapiens OX=9606 GN=LANCL1 PE=1 SV=1;tr|E9PHS0|E9PHS0_HUMAN Glutathione S-transferase LANCL1 (Fragment) OS=Homo sapiens OX=9606 GN=LANCL1 PE=1 SV=1;tr|F8WDS9|F8WDS9_HUMAN Glutathione S-transfera	3	3	3	3	0	0	2	0	1	1	0	0	2	0	1	1	0	0	2	0	1	1	11.3	11.3	11.3	45.283	399	399;196;82	0.00047326	2.1434			By MS/MS		By matching	By MS/MS	0	0	5.8	0	5.5	2.8
Q9NS86	Q9NS86	5	5	5	LanC-like protein 2	LANCL2	sp|Q9NS86|LANC2_HUMAN LanC-like protein 2 OS=Homo sapiens OX=9606 GN=LANCL2 PE=1 SV=1	1	5	5	5	0	0	3	0	0	3	0	0	3	0	0	3	0	0	3	0	0	3	13.1	13.1	13.1	50.854	450	450	0	9.5994			By MS/MS			By MS/MS	0	0	8.4	0	0	8.4
P28838	P28838	1	1	1	Cytosol aminopeptidase	LAP3	sp|P28838|AMPL_HUMAN Cytosol aminopeptidase OS=Homo sapiens OX=9606 GN=LAP3 PE=1 SV=3	1	1	1	1	0	0	0	0	0	0	0	0	0	0	0	0	0	0	0	0	0	0	1.5	1.5	1.5	56.166	519	519	0.0091989	0.98177							0	0	0	0	0	0
Q92615;H0Y641;H0Y4V9	Q92615;H0Y641;H0Y4V9	2;1;1	2;1;1	2;1;1	La-related protein 4B	LARP4B	sp|Q92615|LAR4B_HUMAN La-related protein 4B OS=Homo sapiens OX=9606 GN=LARP4B PE=1 SV=3;tr|H0Y641|H0Y641_HUMAN La-related protein 4B (Fragment) OS=Homo sapiens OX=9606 GN=LARP4B PE=1 SV=2;tr|H0Y4V9|H0Y4V9_HUMAN La-related protein 4B (Fragment) OS=Homo sapi	3	2	2	2	0	1	1	1	0	1	0	1	1	1	0	1	0	1	1	1	0	1	3	3	3	80.551	738	738;190;339	0.0025862	1.4802		By matching	By MS/MS	By MS/MS		By MS/MS	0	1.6	1.4	1.6	0	1.4
Q14739;A0A494C1L1;C9JXK0	Q14739;A0A494C1L1;C9JXK0	2;2;1	2;2;1	2;2;1	Lamin-B receptor	LBR	sp|Q14739|LBR_HUMAN Delta(14)-sterol reductase LBR OS=Homo sapiens OX=9606 GN=LBR PE=1 SV=2;tr|A0A494C1L1|A0A494C1L1_HUMAN 3-beta-hydroxysterol Delta (14)-reductase OS=Homo sapiens OX=9606 GN=LBR PE=1 SV=1;tr|C9JXK0|C9JXK0_HUMAN Delta(14)-sterol reductase	3	2	2	2	0	0	1	0	0	0	0	0	1	0	0	0	0	0	1	0	0	0	5.5	5.5	5.5	70.702	615	615;411;213	0	3.9493			By MS/MS				0	0	3.1	0	0	0
O95447	O95447	1	1	1	Lebercilin-like protein	LCA5L	sp|O95447|LCA5L_HUMAN Lebercilin-like protein OS=Homo sapiens OX=9606 GN=LCA5L PE=1 SV=1	1	1	1	1	0	0	1	0	0	0	0	0	1	0	0	0	0	0	1	0	0	0	1.3	1.3	1.3	76.504	670	670	1	-2			By MS/MS				0	0	1.3	0	0	0
Q8WVC0	Q8WVC0	1	1	1	RNA polymerase-associated protein LEO1	LEO1	sp|Q8WVC0|LEO1_HUMAN RNA polymerase-associated protein LEO1 OS=Homo sapiens OX=9606 GN=LEO1 PE=1 SV=1	1	1	1	1	1	1	0	1	1	0	1	1	0	1	1	0	1	1	0	1	1	0	4.5	4.5	4.5	75.403	666	666	0	12.87	By MS/MS	By MS/MS		By MS/MS	By MS/MS		4.5	4.5	0	4.5	4.5	0
O95202	O95202	1	1	1	LETM1 and EF-hand domain-containing protein 1, mitochondrial	LETM1	sp|O95202|LETM1_HUMAN Mitochondrial proton/calcium exchanger protein OS=Homo sapiens OX=9606 GN=LETM1 PE=1 SV=1	1	1	1	1	0	0	0	0	0	0	0	0	0	0	0	0	0	0	0	0	0	0	2	2	2	83.353	739	739	1	-2							0	0	0	0	0	0
P47929	P47929	2	2	2	Galectin-7	LGALS7	sp|P47929|LEG7_HUMAN Galectin-7 OS=Homo sapiens OX=9606 GN=LGALS7 PE=1 SV=2	1	2	2	2	0	1	0	0	0	0	0	1	0	0	0	0	0	1	0	0	0	0	18.4	18.4	18.4	15.075	136	136	0.0067141	1.0955		By matching					0	8.1	0	0	0	0
Q68G74	Q68G74	1	1	1	LIM/homeobox protein Lhx8	LHX8	sp|Q68G74|LHX8_HUMAN LIM/homeobox protein Lhx8 OS=Homo sapiens OX=9606 GN=LHX8 PE=1 SV=2	1	1	1	1	1	0	0	1	0	0	1	0	0	1	0	0	1	0	0	1	0	0	9.6	9.6	9.6	39.3	356	356	0.0033473	1.3324	By MS/MS			By MS/MS			9.6	0	0	9.6	0	0
B5MC51;P53671	B5MC51;P53671	1;1	1;1	1;1	LIM domain kinase 2	LIMK2	tr|B5MC51|B5MC51_HUMAN LIM domain kinase 2 OS=Homo sapiens OX=9606 GN=LIMK2 PE=1 SV=1;sp|P53671|LIMK2_HUMAN LIM domain kinase 2 OS=Homo sapiens OX=9606 GN=LIMK2 PE=1 SV=1	2	1	1	1	0	0	1	1	0	1	0	0	1	1	0	1	0	0	1	1	0	1	2.9	2.9	2.9	71.192	629	629;638	1	-2			By MS/MS	By matching		By MS/MS	0	0	2.9	2.9	0	2.9
P48059;A0A0J9YXC7;A0A0M3HER1;C9JF46;Q7Z4I7;H0Y592	P48059;A0A0J9YXC7;A0A0M3HER1	7;6;4;3;3;1	7;6;4;3;3;1	7;6;4;3;3;1	LIM and senescent cell antigen-like-containing domain protein 1	LIMS1	sp|P48059|LIMS1_HUMAN LIM and senescent cell antigen-like-containing domain protein 1 OS=Homo sapiens OX=9606 GN=LIMS1 PE=1 SV=4;tr|A0A0J9YXC7|A0A0J9YXC7_HUMAN LIM and senescent cell antigen-like-containing domain protein OS=Homo sapiens OX=9606 GN=LIMS4 P	6	7	7	7	0	0	3	0	0	6	0	0	3	0	0	6	0	0	3	0	0	6	28.6	28.6	28.6	37.251	325	325;398;209;176;341;169	0	18.123			By MS/MS			By MS/MS	0	0	13.8	0	0	24.6
Q5T6M2	Q5T6M2	1	1	1	Putative uncharacterized protein encoded by LINC00242	LINC00242	sp|Q5T6M2|CF122_HUMAN Putative uncharacterized protein encoded by LINC00242 OS=Homo sapiens OX=9606 GN=LINC00242 PE=5 SV=1	1	1	1	1	1	1	0	1	1	0	1	1	0	1	1	0	1	1	0	1	1	0	5.9	5.9	5.9	23.04	205	205	1	-2	By MS/MS	By MS/MS		By MS/MS	By MS/MS		5.9	5.9	0	5.9	5.9	0
Q0VAK6	Q0VAK6	1	1	1	Leiomodin-3	LMOD3	sp|Q0VAK6|LMOD3_HUMAN Leiomodin-3 OS=Homo sapiens OX=9606 GN=LMOD3 PE=1 SV=1	1	1	1	1	0	0	1	0	0	0	0	0	1	0	0	0	0	0	1	0	0	0	1.8	1.8	1.8	64.914	560	560	1	-2			By MS/MS				0	0	1.8	0	0	0
Q9BQK8	Q9BQK8	1	1	1	Phosphatidate phosphatase LPIN3	LPIN3	sp|Q9BQK8|LPIN3_HUMAN Phosphatidate phosphatase LPIN3 OS=Homo sapiens OX=9606 GN=LPIN3 PE=1 SV=3	1	1	1	1	0	1	0	0	0	1	0	1	0	0	0	1	0	1	0	0	0	1	2	2	2	93.613	851	851	1	-2		By matching				By MS/MS	0	2	0	0	0	2
P42704;C9JCA9;B8ZZ38;A0A0C4DG06	P42704;C9JCA9;B8ZZ38;A0A0C4DG06	2;1;1;1	2;1;1;1	2;1;1;1	Leucine-rich PPR motif-containing protein, mitochondrial	LRPPRC	sp|P42704|LPPRC_HUMAN Leucine-rich PPR motif-containing protein, mitochondrial OS=Homo sapiens OX=9606 GN=LRPPRC PE=1 SV=3;tr|C9JCA9|C9JCA9_HUMAN Leucine-rich PPR motif-containing protein, mitochondrial (Fragment) OS=Homo sapiens OX=9606 GN=LRPPRC PE=1 SV=	4	2	2	2	0	0	1	0	0	1	0	0	1	0	0	1	0	0	1	0	0	1	2.2	2.2	2.2	157.9	1394	1394;359;504;531	0.00046404	2.0207			By MS/MS			By MS/MS	0	0	0.9	0	0	1.3
Q9H9A6	Q9H9A6	3	3	3	Leucine-rich repeat-containing protein 40	LRRC40	sp|Q9H9A6|LRC40_HUMAN Leucine-rich repeat-containing protein 40 OS=Homo sapiens OX=9606 GN=LRRC40 PE=1 SV=1	1	3	3	3	0	0	2	0	0	2	0	0	2	0	0	2	0	0	2	0	0	2	5.5	5.5	5.5	68.249	602	602	0	3.3175			By MS/MS			By MS/MS	0	0	3.8	0	0	3.8
Q8N1G4;J3KRP5	Q8N1G4;J3KRP5	2;1	2;1	2;1	Leucine-rich repeat-containing protein 47	LRRC47	sp|Q8N1G4|LRC47_HUMAN Leucine-rich repeat-containing protein 47 OS=Homo sapiens OX=9606 GN=LRRC47 PE=1 SV=1;tr|J3KRP5|J3KRP5_HUMAN Leucine-rich repeat-containing protein 47 (Fragment) OS=Homo sapiens OX=9606 GN=LRRC47 PE=1 SV=1	2	2	2	2	0	0	1	0	0	1	0	0	1	0	0	1	0	0	1	0	0	1	4.6	4.6	4.6	63.472	583	583;50	0	8.8702			By MS/MS			By MS/MS	0	0	3.1	0	0	3.1
A0A7P0Z468;E9PC85;A0A7P0T8S1;Q5S007	A0A7P0Z468;E9PC85;A0A7P0T8S1;Q5S007	1;1;1;1	1;1;1;1	1;1;1;1	Leucine-rich repeat serine/threonine-protein kinase 2	LRRK2	tr|A0A7P0Z468|A0A7P0Z468_HUMAN Leucine-rich repeat serine/threonine-protein kinase 2 OS=Homo sapiens OX=9606 GN=LRRK2 PE=4 SV=1;tr|E9PC85|E9PC85_HUMAN Leucine-rich repeat serine/threonine-protein kinase 2 OS=Homo sapiens OX=9606 GN=LRRK2 PE=1 SV=1;tr|A0A7P	4	1	1	1	1	0	0	0	1	0	1	0	0	0	1	0	1	0	0	0	1	0	6.5	6.5	6.5	45.567	403	403;1271;2442;2527	0.007758	1.0416	By MS/MS				By MS/MS		6.5	0	0	0	6.5	0
A0A6Q8PGT8;A0A6Q8PFL5;A0A6Q8PGW1;A0A6Q8PG02;A0A6Q8PGF7;A0A6Q8PGB2;Q6UWE0;A0A6Q8PFT9;A0A6Q8PFI6;A0A6Q8PH70;A0A6Q8PFW1;A0A6Q8PFL1	A0A6Q8PGT8;A0A6Q8PFL5;A0A6Q8PGW1;A0A6Q8PG02;A0A6Q8PGF7;A0A6Q8PGB2;Q6UWE0;A0A6Q8PFT9;A0A6Q8PFI6;A0A6Q8PH70;A0A6Q8PFW1	4;4;4;4;4;4;4;3;2;2;2;1	4;4;4;4;4;4;4;3;2;2;2;1	4;4;4;4;4;4;4;3;2;2;2;1	E3 ubiquitin-protein ligase LRSAM1	LRSAM1	tr|A0A6Q8PGT8|A0A6Q8PGT8_HUMAN E3 ubiquitin-protein ligase LRSAM1 OS=Homo sapiens OX=9606 GN=LRSAM1 PE=1 SV=1;tr|A0A6Q8PFL5|A0A6Q8PFL5_HUMAN E3 ubiquitin-protein ligase LRSAM1 OS=Homo sapiens OX=9606 GN=LRSAM1 PE=1 SV=1;tr|A0A6Q8PGW1|A0A6Q8PGW1_HUMAN E3 ub	12	4	4	4	0	0	2	0	0	1	0	0	2	0	0	1	0	0	2	0	0	1	8.8	8.8	8.8	74.117	638	638;653;690;704;708;750;723;663;420;428;432;254	0	19.088			By MS/MS			By MS/MS	0	0	4.7	0	0	2.2
O15116;E5RJ47;E5RH18	O15116	3;1;1	3;1;1	3;1;1	U6 snRNA-associated Sm-like protein LSm1	LSM1	sp|O15116|LSM1_HUMAN U6 snRNA-associated Sm-like protein LSm1 OS=Homo sapiens OX=9606 GN=LSM1 PE=1 SV=1	3	3	3	3	1	1	0	1	0	1	1	1	0	1	0	1	1	1	0	1	0	1	27.1	27.1	27.1	15.179	133	133;44;44	0	5.34	By MS/MS	By MS/MS		By MS/MS		By MS/MS	9.8	9.8	0	9.8	0	12
Q9Y333	Q9Y333	1	1	1	U6 snRNA-associated Sm-like protein LSm2	LSM2	sp|Q9Y333|LSM2_HUMAN U6 snRNA-associated Sm-like protein LSm2 OS=Homo sapiens OX=9606 GN=LSM2 PE=1 SV=1	1	1	1	1	0	0	1	0	0	0	0	0	1	0	0	0	0	0	1	0	0	0	20	20	20	10.834	95	95	0	6.6749			By MS/MS				0	0	20	0	0	0
P62310	P62310	1	1	1	U6 snRNA-associated Sm-like protein LSm3	LSM3	sp|P62310|LSM3_HUMAN U6 snRNA-associated Sm-like protein LSm3 OS=Homo sapiens OX=9606 GN=LSM3 PE=1 SV=2	1	1	1	1	1	1	1	0	1	1	1	1	1	0	1	1	1	1	1	0	1	1	20.6	20.6	20.6	11.845	102	102	0	131.61	By matching	By MS/MS	By MS/MS		By matching	By matching	20.6	20.6	20.6	0	20.6	20.6
B8ZZF8;Q9Y4Y9	B8ZZF8;Q9Y4Y9	2;2	2;2	2;2	U6 snRNA-associated Sm-like protein LSm5	LSM5	tr|B8ZZF8|B8ZZF8_HUMAN U6 snRNA-associated Sm-like protein LSm5 OS=Homo sapiens OX=9606 GN=LSM5 PE=1 SV=1;sp|Q9Y4Y9|LSM5_HUMAN U6 snRNA-associated Sm-like protein LSm5 OS=Homo sapiens OX=9606 GN=LSM5 PE=1 SV=3	2	2	2	2	0	0	2	0	0	2	0	0	2	0	0	2	0	0	2	0	0	2	37.5	37.5	37.5	7.0202	64	64;91	0	150.65			By MS/MS			By MS/MS	0	0	37.5	0	0	37.5
D6RDI2;J3KPP4;O95232;D6RHH0;U3KQT3;C9JL41;H7C5U7;E7EN55	D6RDI2;J3KPP4;O95232;D6RHH0;U3KQT3;C9JL41	4;4;4;2;2;2;1;1	4;4;4;2;2;2;1;1	4;4;4;2;2;2;1;1	Luc7-like protein 3	LUC7L3	tr|D6RDI2|D6RDI2_HUMAN Luc7-like protein 3 (Fragment) OS=Homo sapiens OX=9606 GN=LUC7L3 PE=1 SV=1;tr|J3KPP4|J3KPP4_HUMAN Cisplatin resistance-associated overexpressed protein, isoform CRA_b OS=Homo sapiens OX=9606 GN=LUC7L3 PE=1 SV=1;sp|O95232|LC7L3_HUMAN	8	4	4	4	0	0	1	0	0	3	0	0	1	0	0	3	0	0	1	0	0	3	27.7	27.7	27.7	20.677	184	184;489;432;36;46;79;39;54	0	7.0903			By matching			By MS/MS	0	0	8.7	0	0	20.1
Q9NX58	Q9NX58	1	1	1	Cell growth-regulating nucleolar protein	LYAR	sp|Q9NX58|LYAR_HUMAN Cell growth-regulating nucleolar protein OS=Homo sapiens OX=9606 GN=LYAR PE=1 SV=2	1	1	1	1	0	0	0	0	0	0	0	0	0	0	0	0	0	0	0	0	0	0	4.2	4.2	4.2	43.614	379	379	0.0025619	1.4244							0	0	0	0	0	0
P07948;E5RJ37;H0Y3C5;J3KPD6;P08631	P07948	8;2;1;1;1	8;2;1;1;1	8;2;1;1;1	Tyrosine-protein kinase Lyn	LYN	sp|P07948|LYN_HUMAN Tyrosine-protein kinase Lyn OS=Homo sapiens OX=9606 GN=LYN PE=1 SV=3	5	8	8	8	0	0	0	1	2	7	0	0	0	1	2	7	0	0	0	1	2	7	19.7	19.7	19.7	58.573	512	512;150;525;526;526	0	21.626				By MS/MS	By MS/MS	By MS/MS	0	0	0	2	4.3	17.8
A0A087X1K9;E5RGR0;O75608;E5RJ48;B4DP64	A0A087X1K9;E5RGR0;O75608;E5RJ48;B4DP64	2;2;2;1;1	2;2;2;1;1	2;2;2;1;1	Acyl-protein thioesterase 1	LYPLA1	tr|A0A087X1K9|A0A087X1K9_HUMAN Acyl-protein thioesterase 1 OS=Homo sapiens OX=9606 GN=LYPLA1 PE=1 SV=1;tr|E5RGR0|E5RGR0_HUMAN Acyl-protein thioesterase 1 (Fragment) OS=Homo sapiens OX=9606 GN=LYPLA1 PE=1 SV=1;sp|O75608|LYPA1_HUMAN Acyl-protein thioesterase	5	2	2	2	0	0	2	1	0	2	0	0	2	1	0	2	0	0	2	1	0	2	15.1	15.1	15.1	17.981	166	166;197;230;90;196	0	4.1238			By MS/MS	By MS/MS		By MS/MS	0	0	15.1	6.6	0	15.1
Q5VWZ2	Q5VWZ2	1	1	1	Lysophospholipase-like protein 1	LYPLAL1	sp|Q5VWZ2|LYPL1_HUMAN Lysophospholipase-like protein 1 OS=Homo sapiens OX=9606 GN=LYPLAL1 PE=1 SV=3	1	1	1	1	0	0	1	0	0	0	0	0	1	0	0	0	0	0	1	0	0	0	7.2	7.2	7.2	26.316	237	237	0.0037563	1.319			By MS/MS				0	0	7.2	0	0	0
Q96S90	Q96S90	2	2	2	LysM and putative peptidoglycan-binding domain-containing protein 1	LYSMD1	sp|Q96S90|LYSM1_HUMAN LysM and putative peptidoglycan-binding domain-containing protein 1 OS=Homo sapiens OX=9606 GN=LYSMD1 PE=1 SV=1	1	2	2	2	0	0	1	0	0	1	0	0	1	0	0	1	0	0	1	0	0	1	10.1	10.1	10.1	25.003	227	227	0.0037547	1.3135			By MS/MS			By MS/MS	0	0	5.3	0	0	4.8
Q9NQ48;H7C488;A0A7P0TAT3	Q9NQ48;H7C488	4;2;1	4;2;1	4;2;1	Leucine zipper transcription factor-like protein 1	LZTFL1	sp|Q9NQ48|LZTL1_HUMAN Leucine zipper transcription factor-like protein 1 OS=Homo sapiens OX=9606 GN=LZTFL1 PE=1 SV=1;tr|H7C488|H7C488_HUMAN Leucine zipper transcription factor-like protein 1 (Fragment) OS=Homo sapiens OX=9606 GN=LZTFL1 PE=1 SV=1	3	4	4	4	1	2	2	2	1	3	1	2	2	2	1	3	1	2	2	2	1	3	24.7	24.7	24.7	34.592	299	299;235;172	0	8.7106	By matching	By matching	By MS/MS	By MS/MS	By matching	By MS/MS	6.4	12.4	12	12.4	6.4	18.7
Q9BRK4	Q9BRK4	4	4	4	Leucine zipper putative tumor suppressor 2	LZTS2	sp|Q9BRK4|LZTS2_HUMAN Leucine zipper putative tumor suppressor 2 OS=Homo sapiens OX=9606 GN=LZTS2 PE=1 SV=2	1	4	4	4	1	1	0	1	1	1	1	1	0	1	1	1	1	1	0	1	1	1	8.2	8.2	8.2	72.759	669	669	0	6.2572	By matching	By MS/MS		By MS/MS	By matching	By matching	2.5	2.5	0	2.5	2.5	2.2
O60299	O60299	2	2	2	Leucine zipper putative tumor suppressor 3	LZTS3	sp|O60299|LZTS3_HUMAN Leucine zipper putative tumor suppressor 3 OS=Homo sapiens OX=9606 GN=LZTS3 PE=2 SV=1	1	2	2	2	0	0	1	0	0	0	0	0	1	0	0	0	0	0	1	0	0	0	4.5	4.5	4.5	71.79	673	673	0.0056429	1.1875			By matching				0	0	2.4	0	0	0
Q9BXY0;H0YBV6	Q9BXY0;H0YBV6	2;1	2;1	2;1	Protein MAK16 homolog	MAK16	sp|Q9BXY0|MAK16_HUMAN Protein MAK16 homolog OS=Homo sapiens OX=9606 GN=MAK16 PE=1 SV=2;tr|H0YBV6|H0YBV6_HUMAN Protein MAK16 homolog (Fragment) OS=Homo sapiens OX=9606 GN=MAK16 PE=1 SV=1	2	2	2	2	0	0	1	0	0	0	0	0	1	0	0	0	0	0	1	0	0	0	10.7	10.7	10.7	35.368	300	300;137	0	13.09			By MS/MS				0	0	4.7	0	0	0
Q02750;P36507;G5E9C7;A0A1B0GUL7	Q02750;P36507;G5E9C7	4;3;2;1	4;3;2;1	4;3;2;1	Dual specificity mitogen-activated protein kinase kinase 1;Dual specificity mitogen-activated protein kinase kinase 2	MAP2K1;MAP2K2	sp|Q02750|MP2K1_HUMAN Dual specificity mitogen-activated protein kinase kinase 1 OS=Homo sapiens OX=9606 GN=MAP2K1 PE=1 SV=2;sp|P36507|MP2K2_HUMAN Dual specificity mitogen-activated protein kinase kinase 2 OS=Homo sapiens OX=9606 GN=MAP2K2 PE=1 SV=1;tr|G5E	4	4	4	4	0	0	1	0	0	2	0	0	1	0	0	2	0	0	1	0	0	2	11.7	11.7	11.7	43.439	393	393;400;303;405	0	3.6726			By MS/MS			By MS/MS	0	0	3.1	0	0	6.1
F5H4R1;J3KNB8;F5H538;Q9Y6R4	F5H4R1;J3KNB8;F5H538;Q9Y6R4	1;1;1;1	1;1;1;1	1;1;1;1	Mitogen-activated protein kinase kinase kinase 4	MAP3K4	tr|F5H4R1|F5H4R1_HUMAN Mitogen-activated protein kinase kinase kinase 4 OS=Homo sapiens OX=9606 GN=MAP3K4 PE=1 SV=1;tr|J3KNB8|J3KNB8_HUMAN Mitogen-activated protein kinase kinase kinase 4 OS=Homo sapiens OX=9606 GN=MAP3K4 PE=1 SV=1;tr|F5H538|F5H538_HUMAN M	4	1	1	1	1	1	0	1	1	0	1	1	0	1	1	0	1	1	0	1	1	0	0.6	0.6	0.6	163.01	1442	1442;1554;1604;1608	0.0078064	1.0647	By MS/MS	By MS/MS		By MS/MS	By MS/MS		0.6	0.6	0	0.6	0.6	0
O43318;Q9UG54	O43318;Q9UG54	3;2	3;2	3;2	Mitogen-activated protein kinase kinase kinase 7	MAP3K7;DKFZp586F0420	sp|O43318|M3K7_HUMAN Mitogen-activated protein kinase kinase kinase 7 OS=Homo sapiens OX=9606 GN=MAP3K7 PE=1 SV=1;tr|Q9UG54|Q9UG54_HUMAN Mitogen-activated protein kinase kinase kinase OS=Homo sapiens OX=9606 GN=MAP3K7 PE=1 SV=1	2	3	3	3	1	0	3	0	1	3	1	0	3	0	1	3	1	0	3	0	1	3	7.6	7.6	7.6	67.195	606	606;260	0	21.967	By MS/MS		By MS/MS		By MS/MS	By MS/MS	3	0	7.6	0	3	7.6
A0A0D9SEY1;O95819;H7C3Z6;C9J840;E7EX83;A0A0D9SG62;H7C0P6	A0A0D9SEY1;O95819;H7C3Z6;C9J840;E7EX83;A0A0D9SG62;H7C0P6	2;2;1;1;1;1;1	2;2;1;1;1;1;1	1;1;1;1;1;1;1	Mitogen-activated protein kinase kinase kinase kinase 4	MAP4K4	tr|A0A0D9SEY1|A0A0D9SEY1_HUMAN Mitogen-activated protein kinase kinase kinase kinase 4 OS=Homo sapiens OX=9606 GN=MAP4K4 PE=1 SV=1;sp|O95819|M4K4_HUMAN Mitogen-activated protein kinase kinase kinase kinase 4 OS=Homo sapiens OX=9606 GN=MAP4K4 PE=1 SV=2;tr|H	7	2	2	1	0	0	2	0	0	1	0	0	2	0	0	1	0	0	1	0	0	0	2	2	1.5	151.08	1320	1320;1239;258;987;1038;1044;1056	0.0025795	1.4614			By MS/MS			By MS/MS	0	0	2	0	0	0.5
A0A087WZ40;Q14244	A0A087WZ40;Q14244	4;4	4;4	4;4	Ensconsin	MAP7	tr|A0A087WZ40|A0A087WZ40_HUMAN Ensconsin OS=Homo sapiens OX=9606 GN=MAP7 PE=1 SV=1;sp|Q14244|MAP7_HUMAN Ensconsin OS=Homo sapiens OX=9606 GN=MAP7 PE=1 SV=1	2	4	4	4	0	0	3	0	0	2	0	0	3	0	0	2	0	0	3	0	0	2	6.8	6.8	6.8	87.817	779	779;749	0.0004852	2.3795			By MS/MS			By matching	0	0	5.4	0	0	3.2
Q3KQU3	Q3KQU3	2	2	2	MAP7 domain-containing protein 1	MAP7D1	sp|Q3KQU3|MA7D1_HUMAN MAP7 domain-containing protein 1 OS=Homo sapiens OX=9606 GN=MAP7D1 PE=1 SV=1	1	2	2	2	0	0	1	0	0	1	0	0	1	0	0	1	0	0	1	0	0	1	2	2	2	92.819	841	841	0	5.9979			By MS/MS			By matching	0	0	2	0	0	1.9
Q16539;B4E0K5;B5TY33;E7EX54;H7C4E2	Q16539;B4E0K5	20;15;9;6;4	20;15;9;6;4	20;15;9;6;4	Mitogen-activated protein kinase 14	MAPK14	sp|Q16539|MK14_HUMAN Mitogen-activated protein kinase 14 OS=Homo sapiens OX=9606 GN=MAPK14 PE=1 SV=3;tr|B4E0K5|B4E0K5_HUMAN Mitogen-activated protein kinase 14 OS=Homo sapiens OX=9606 GN=MAPK14 PE=1 SV=1	5	20	20	20	3	3	8	4	6	20	3	3	8	4	6	20	3	3	8	4	6	20	63.1	63.1	63.1	41.293	360	360;283;173;132;90	0	188.94	By MS/MS	By MS/MS	By MS/MS	By MS/MS	By MS/MS	By MS/MS	6.1	6.1	32.8	15.6	21.9	63.1
Q8NDC0	Q8NDC0	1	1	1	MAPK-interacting and spindle-stabilizing protein-like	MAPK1IP1L	sp|Q8NDC0|MISSL_HUMAN MAPK-interacting and spindle-stabilizing protein-like OS=Homo sapiens OX=9606 GN=MAPK1IP1L PE=1 SV=4	1	1	1	1	1	1	1	1	1	1	1	1	1	1	1	1	1	1	1	1	1	1	6.9	6.9	6.9	24.269	245	245	0	108.67	By MS/MS	By MS/MS	By MS/MS	By MS/MS	By MS/MS	By MS/MS	6.9	6.9	6.9	6.9	6.9	6.9
B1AMB1;B1AMB2;Q9BPZ7	B1AMB1;B1AMB2;Q9BPZ7	1;1;1	1;1;1	1;1;1	Target of rapamycin complex 2 subunit MAPKAP1	MAPKAP1	tr|B1AMB1|B1AMB1_HUMAN Target of rapamycin complex 2 subunit MAPKAP1 (Fragment) OS=Homo sapiens OX=9606 GN=MAPKAP1 PE=1 SV=1;tr|B1AMB2|B1AMB2_HUMAN Target of rapamycin complex 2 subunit MAPKAP1 (Fragment) OS=Homo sapiens OX=9606 GN=MAPKAP1 PE=1 SV=1;sp|Q9B	3	1	1	1	0	0	1	1	1	1	0	0	1	1	1	1	0	0	1	1	1	1	15.1	15.1	15.1	10.36	93	93;132;522	0	15.434			By MS/MS	By MS/MS	By MS/MS	By MS/MS	0	0	15.1	15.1	15.1	15.1
C9J8E1;Q16644	C9J8E1;Q16644	1;1	1;1	1;1	MAP kinase-activated protein kinase 3	MAPKAPK3	tr|C9J8E1|C9J8E1_HUMAN MAP kinase-activated protein kinase 3 (Fragment) OS=Homo sapiens OX=9606 GN=MAPKAPK3 PE=1 SV=1;sp|Q16644|MAPK3_HUMAN MAP kinase-activated protein kinase 3 OS=Homo sapiens OX=9606 GN=MAPKAPK3 PE=1 SV=1	2	1	1	1	0	0	1	0	0	1	0	0	1	0	0	1	0	0	1	0	0	1	5.1	5.1	5.1	37.389	332	332;382	0.00046533	2.0342			By MS/MS			By matching	0	0	5.1	0	0	5.1
Q15691	Q15691	11	11	11	Microtubule-associated protein RP/EB family member 1	MAPRE1	sp|Q15691|MARE1_HUMAN Microtubule-associated protein RP/EB family member 1 OS=Homo sapiens OX=9606 GN=MAPRE1 PE=1 SV=3	1	11	11	11	1	1	6	2	2	4	1	1	6	2	2	4	1	1	6	2	2	4	55.6	55.6	55.6	29.999	268	268	0	119.87	By MS/MS	By MS/MS	By MS/MS	By MS/MS	By MS/MS	By MS/MS	7.1	7.1	30.6	17.2	17.2	26.9
P49006	P49006	1	1	1	MARCKS-related protein	MARCKSL1	sp|P49006|MRP_HUMAN MARCKS-related protein OS=Homo sapiens OX=9606 GN=MARCKSL1 PE=1 SV=2	1	1	1	1	0	0	0	0	0	1	0	0	0	0	0	1	0	0	0	0	0	1	4.1	4.1	4.1	19.529	195	195	0.0080956	1.0205						By MS/MS	0	0	0	0	0	4.1
A0A7I2V4L1;H0YIY6;A0A7I2V2U9;H0YJI9;A0A7I2V4K8;J3KNR0;A0A7I2YQF7;A0A7I2V2N8;A0A7I2V639;A0A7I2V3I9;A0A7I2V5G3;A0A7I2V3B9;A0A7I2V549;A0A7I2V602;A0A7I2V4G7;H0YNV4;A0A7I2YQF4;H0YKP9;A0A7I2V2E3;A0A7I2V4T2;A0A7I2V2I9;A0A7I2V3P5;A0A7I2V3C6;A0A7I2V3K2;A0A7I2V409;P27448	A0A7I2V4L1;H0YIY6;A0A7I2V2U9;H0YJI9;A0A7I2V4K8;J3KNR0;A0A7I2YQF7;A0A7I2V2N8;A0A7I2V639;A0A7I2V3I9;A0A7I2V5G3;A0A7I2V3B9;A0A7I2V549;A0A7I2V602;A0A7I2V4G7;H0YNV4;A0A7I2YQF4;H0YKP9;A0A7I2V2E3;A0A7I2V4T2;A0A7I2V2I9;A0A7I2V3P5;A0A7I2V3C6;A0A7I2V3K2;A0A7I2V409;P27448	1;1;1;1;1;1;1;1;1;1;1;1;1;1;1;1;1;1;1;1;1;1;1;1;1;1	1;1;1;1;1;1;1;1;1;1;1;1;1;1;1;1;1;1;1;1;1;1;1;1;1;1	1;1;1;1;1;1;1;1;1;1;1;1;1;1;1;1;1;1;1;1;1;1;1;1;1;1	MAP/microtubule affinity-regulating kinase 3	MARK3	tr|A0A7I2V4L1|A0A7I2V4L1_HUMAN MAP/microtubule affinity-regulating kinase 3 OS=Homo sapiens OX=9606 GN=MARK3 PE=1 SV=1;tr|H0YIY6|H0YIY6_HUMAN Non-specific serine/threonine protein kinase (Fragment) OS=Homo sapiens OX=9606 GN=MARK3 PE=1 SV=2;tr|A0A7I2V2U9|A	26	1	1	1	0	0	1	0	0	1	0	0	1	0	0	1	0	0	1	0	0	1	2.4	2.4	2.4	42.651	373	373;505;790;789;781;776;738;726;689;682;674;665;664;655;647;643;640;623;622;621;554;535;529;507;796;753	0.0029598	1.387			By MS/MS			By MS/MS	0	0	2.4	0	0	2.4
P35410	P35410	1	1	1	Mas-related G-protein coupled receptor MRG	MAS1L	sp|P35410|MAS1L_HUMAN Mas-related G-protein coupled receptor MRG OS=Homo sapiens OX=9606 GN=MAS1L PE=2 SV=1	1	1	1	1	1	1	0	1	1	0	1	1	0	1	1	0	1	1	0	1	1	0	3.2	3.2	3.2	42.41	378	378	1	-2	By MS/MS	By MS/MS		By MS/MS	By MS/MS		3.2	3.2	0	3.2	3.2	0
Q07820	Q07820	1	1	1	Induced myeloid leukemia cell differentiation protein Mcl-1	MCL1	sp|Q07820|MCL1_HUMAN Induced myeloid leukemia cell differentiation protein Mcl-1 OS=Homo sapiens OX=9606 GN=MCL1 PE=1 SV=3	1	1	1	1	1	0	1	0	1	0	1	0	1	0	1	0	1	0	1	0	1	0	2.6	2.6	2.6	37.337	350	350	0.0029474	1.3706	By MS/MS		By MS/MS		By MS/MS		2.6	0	2.6	0	2.6	0
Q9ULC4	Q9ULC4	2	2	2	Malignant T-cell-amplified sequence 1	MCTS1	sp|Q9ULC4|MCTS1_HUMAN Malignant T-cell-amplified sequence 1 OS=Homo sapiens OX=9606 GN=MCTS1 PE=1 SV=1	1	2	2	2	0	0	1	0	0	1	0	0	1	0	0	1	0	0	1	0	0	1	17.7	17.7	17.7	20.555	181	181	0	5.2826			By MS/MS			By MS/MS	0	0	9.4	0	0	9.4
B9A041;P40925;B8ZZ51;A0A5K1VW95;C9JRL4;C9JF79	B9A041;P40925;B8ZZ51;A0A5K1VW95	3;3;2;2;1;1	3;3;2;2;1;1	3;3;2;2;1;1	Malate dehydrogenase, cytoplasmic	MDH1	tr|B9A041|B9A041_HUMAN Malate dehydrogenase, cytoplasmic OS=Homo sapiens OX=9606 GN=MDH1 PE=1 SV=1;sp|P40925|MDHC_HUMAN Malate dehydrogenase, cytoplasmic OS=Homo sapiens OX=9606 GN=MDH1 PE=1 SV=4;tr|B8ZZ51|B8ZZ51_HUMAN Malate dehydrogenase, cytoplasmic OS=	6	3	3	3	1	0	2	0	3	1	1	0	2	0	3	1	1	0	2	0	3	1	20.5	20.5	20.5	23.038	210	210;334;169;353;119;222	0	3.2058	By MS/MS		By MS/MS		By MS/MS	By MS/MS	5.7	0	12.9	0	20.5	7.1
P40926;G3XAL0	P40926;G3XAL0	7;5	7;5	7;5	Malate dehydrogenase, mitochondrial;Malate dehydrogenase	MDH2	sp|P40926|MDHM_HUMAN Malate dehydrogenase, mitochondrial OS=Homo sapiens OX=9606 GN=MDH2 PE=1 SV=3;tr|G3XAL0|G3XAL0_HUMAN Malate dehydrogenase OS=Homo sapiens OX=9606 GN=MDH2 PE=1 SV=1	2	7	7	7	0	0	5	0	2	1	0	0	5	0	2	1	0	0	5	0	2	1	31.7	31.7	31.7	35.503	338	338;231	0	34.492			By MS/MS		By MS/MS	By MS/MS	0	0	24.6	0	10.1	6.5
A0A2R8Y7W8;A0A2R8Y6W5;Q16626	A0A2R8Y7W8;A0A2R8Y6W5;Q16626	1;1;1	1;1;1	1;1;1	Male-enhanced antigen 1	MEA1	tr|A0A2R8Y7W8|A0A2R8Y7W8_HUMAN Male-enhanced antigen 1 OS=Homo sapiens OX=9606 GN=MEA1 PE=1 SV=1;tr|A0A2R8Y6W5|A0A2R8Y6W5_HUMAN Male-enhanced antigen 1 OS=Homo sapiens OX=9606 GN=MEA1 PE=1 SV=1;sp|Q16626|MEA1_HUMAN Male-enhanced antigen 1 OS=Homo sapiens O	3	1	1	1	1	1	0	1	1	0	1	1	0	1	1	0	1	1	0	1	1	0	10.5	10.5	10.5	18.544	172	172;188;185	0	2.9753	By MS/MS	By MS/MS		By MS/MS	By MS/MS		10.5	10.5	0	10.5	10.5	0
Q9HAF1	Q9HAF1	3	3	3	Chromatin modification-related protein MEAF6	MEAF6	sp|Q9HAF1|EAF6_HUMAN Chromatin modification-related protein MEAF6 OS=Homo sapiens OX=9606 GN=MEAF6 PE=1 SV=1	1	3	3	3	0	0	1	0	0	1	0	0	1	0	0	1	0	0	1	0	0	1	13.1	13.1	13.1	21.635	191	191	0	2.8629			By matching			By MS/MS	0	0	6.8	0	0	6.8
A0A6I8PLG6;I3L3E8;I3L2Q0;Q9P086	A0A6I8PLG6;I3L3E8;I3L2Q0;Q9P086	1;1;1;1	1;1;1;1	1;1;1;1	Mediator of RNA polymerase II transcription subunit 11	MED11	tr|A0A6I8PLG6|A0A6I8PLG6_HUMAN Mediator of RNA polymerase II transcription subunit 11 OS=Homo sapiens OX=9606 GN=MED11 PE=1 SV=1;tr|I3L3E8|I3L3E8_HUMAN Mediator of RNA polymerase II transcription subunit 11 OS=Homo sapiens OX=9606 GN=MED11 PE=1 SV=1;tr|I3L	4	1	1	1	1	0	0	0	1	0	1	0	0	0	1	0	1	0	0	0	1	0	31.4	31.4	31.4	3.8082	35	35;85;93;117	0.0055978	1.1486	By MS/MS				By MS/MS		31.4	0	0	0	31.4	0
Q7L2J0	Q7L2J0	1	1	1	7SK snRNA methylphosphate capping enzyme	MEPCE	sp|Q7L2J0|MEPCE_HUMAN 7SK snRNA methylphosphate capping enzyme OS=Homo sapiens OX=9606 GN=MEPCE PE=1 SV=1	1	1	1	1	0	0	0	0	0	0	0	0	0	0	0	0	0	0	0	0	0	0	2.8	2.8	2.8	74.354	689	689	0.00089326	1.7319							0	0	0	0	0	0
F8VRR3;F8VQZ7;P50579	F8VRR3;F8VQZ7;P50579	1;1;1	1;1;1	1;1;1	Methionine aminopeptidase 2	METAP2	tr|F8VRR3|F8VRR3_HUMAN Methionine aminopeptidase 2 OS=Homo sapiens OX=9606 GN=METAP2 PE=1 SV=1;tr|F8VQZ7|F8VQZ7_HUMAN Methionine aminopeptidase 2 OS=Homo sapiens OX=9606 GN=METAP2 PE=1 SV=1;sp|P50579|MAP2_HUMAN Methionine aminopeptidase 2 OS=Homo sapiens O	3	1	1	1	0	0	1	0	0	1	0	0	1	0	0	1	0	0	1	0	0	1	2.9	2.9	2.9	48.876	442	442;477;478	0.0004562	1.8798			By MS/MS			By MS/MS	0	0	2.9	0	0	2.9
H0YHU4;H0YIH0;Q9UBP6	H0YHU4;H0YIH0;Q9UBP6	1;1;1	1;1;1	1;1;1	tRNA (guanine-N(7)-)-methyltransferase	METTL1	tr|H0YHU4|H0YHU4_HUMAN tRNA (guanine-N(7)-)-methyltransferase (Fragment) OS=Homo sapiens OX=9606 GN=METTL1 PE=1 SV=1;tr|H0YIH0|H0YIH0_HUMAN tRNA (guanine-N(7)-)-methyltransferase (Fragment) OS=Homo sapiens OX=9606 GN=METTL1 PE=1 SV=1;sp|Q9UBP6|TRMB_HUMAN t	3	1	1	1	0	0	1	0	0	1	0	0	1	0	0	1	0	0	1	0	0	1	23.8	23.8	23.8	7.0119	63	63;124;276	0	9.5198			By MS/MS			By MS/MS	0	0	23.8	0	0	23.8
O60502;H7C3X0	O60502	3;1	3;1	3;1	Protein O-GlcNAcase	MGEA5	sp|O60502|OGA_HUMAN Protein O-GlcNAcase OS=Homo sapiens OX=9606 GN=OGA PE=1 SV=2	2	3	3	3	0	0	2	0	0	2	0	0	2	0	0	2	0	0	2	0	0	2	4.8	4.8	4.8	102.91	916	916;256	0	3.2705			By MS/MS			By MS/MS	0	0	3.8	0	0	3.8
Q5QPE8;Q9BQP7	Q5QPE8;Q9BQP7	1;1	1;1	1;1	Mitochondrial genome maintenance exonuclease 1	MGME1	tr|Q5QPE8|Q5QPE8_HUMAN Mitochondrial genome maintenance exonuclease 1 OS=Homo sapiens OX=9606 GN=MGME1 PE=1 SV=1;sp|Q9BQP7|MGME1_HUMAN Mitochondrial genome maintenance exonuclease 1 OS=Homo sapiens OX=9606 GN=MGME1 PE=1 SV=1	2	1	1	1	0	0	0	0	0	1	0	0	0	0	0	1	0	0	0	0	0	1	9.8	9.8	9.8	30.014	264	264;344	0.00088496	1.6451						By MS/MS	0	0	0	0	0	9.8
A0A0A0MRH6;Q5JRA6	A0A0A0MRH6;Q5JRA6	1;1	1;1	1;1	Melanoma inhibitory activity protein 3	MIA3	tr|A0A0A0MRH6|A0A0A0MRH6_HUMAN Transport and Golgi organization protein 1 homolog (Fragment) OS=Homo sapiens OX=9606 GN=MIA3 PE=1 SV=6;sp|Q5JRA6|TGO1_HUMAN Transport and Golgi organization protein 1 homolog OS=Homo sapiens OX=9606 GN=MIA3 PE=1 SV=1	2	1	1	1	1	1	0	1	1	0	1	1	0	1	1	0	1	1	0	1	1	0	2.2	2.2	2.2	113.9	1015	1015;1907	0.0021617	1.5044	By MS/MS	By MS/MS		By MS/MS	By MS/MS		2.2	2.2	0	2.2	2.2	0
Q86YT6	Q86YT6	2	2	2	E3 ubiquitin-protein ligase MIB1	MIB1	sp|Q86YT6|MIB1_HUMAN E3 ubiquitin-protein ligase MIB1 OS=Homo sapiens OX=9606 GN=MIB1 PE=1 SV=1	1	2	2	2	0	0	0	0	0	2	0	0	0	0	0	2	0	0	0	0	0	2	3	3	3	110.13	1006	1006	0.00048146	2.2909						By MS/MS	0	0	0	0	0	3
Q9UJV3;A6PVI4	Q9UJV3;A6PVI4	3;2	3;2	2;1	Probable E3 ubiquitin-protein ligase MID2	MID2	sp|Q9UJV3|TRIM1_HUMAN Probable E3 ubiquitin-protein ligase MID2 OS=Homo sapiens OX=9606 GN=MID2 PE=1 SV=3;tr|A6PVI4|A6PVI4_HUMAN Probable E3 ubiquitin-protein ligase MID2 (Fragment) OS=Homo sapiens OX=9606 GN=MID2 PE=1 SV=8	2	3	3	2	0	0	2	0	0	2	0	0	2	0	0	2	0	0	1	0	0	2	5.9	5.9	4.1	83.209	735	735;218	0.00045662	1.8838			By MS/MS			By MS/MS	0	0	3.3	0	0	4.1
J3QLN4;J3KSU6;J3QKW3;J3KSB8;J3QRZ6;J3QLJ5;A0A3B3IU65;A9UHW6	J3QLN4;J3KSU6;J3QKW3;J3KSB8;J3QRZ6;J3QLJ5;A0A3B3IU65;A9UHW6	1;1;1;1;1;1;1;1	1;1;1;1;1;1;1;1	1;1;1;1;1;1;1;1	MIF4G domain-containing protein	MIF4GD	tr|J3QLN4|J3QLN4_HUMAN MIF4G domain-containing protein OS=Homo sapiens OX=9606 GN=MIF4GD PE=1 SV=1;tr|J3KSU6|J3KSU6_HUMAN MIF4G domain-containing protein (Fragment) OS=Homo sapiens OX=9606 GN=MIF4GD PE=1 SV=1;tr|J3QKW3|J3QKW3_HUMAN MIF4G domain-containing	8	1	1	1	1	1	0	1	1	0	1	1	0	1	1	0	1	1	0	1	1	0	53.7	53.7	53.7	4.57	41	41;155;169;170;204;251;277;222	0	21.867	By MS/MS	By MS/MS		By MS/MS	By MS/MS		53.7	53.7	0	53.7	53.7	0
Q9NXC5	Q9NXC5	4	4	4	WD repeat-containing protein mio	MIOS	sp|Q9NXC5|MIO_HUMAN GATOR complex protein MIOS OS=Homo sapiens OX=9606 GN=MIOS PE=1 SV=2	1	4	4	4	0	0	2	0	0	1	0	0	2	0	0	1	0	0	2	0	0	1	4.9	4.9	4.9	98.583	875	875	0	2.5801			By MS/MS			By MS/MS	0	0	2.6	0	0	0.9
Q99797	Q99797	1	1	1	Mitochondrial intermediate peptidase	MIPEP	sp|Q99797|MIPEP_HUMAN Mitochondrial intermediate peptidase OS=Homo sapiens OX=9606 GN=MIPEP PE=1 SV=2	1	1	1	1	0	0	0	0	0	1	0	0	0	0	0	1	0	0	0	0	0	1	1.8	1.8	1.8	80.64	713	713	0.0029661	1.3944						By MS/MS	0	0	0	0	0	1.8
Q9NYP9	Q9NYP9	5	5	5	Protein Mis18-alpha	MIS18A	sp|Q9NYP9|MS18A_HUMAN Protein Mis18-alpha OS=Homo sapiens OX=9606 GN=MIS18A PE=1 SV=1	1	5	5	5	0	0	3	0	0	4	0	0	3	0	0	4	0	0	3	0	0	4	35.6	35.6	35.6	25.863	233	233	0	27.524			By MS/MS			By MS/MS	0	0	25.8	0	0	31.3
P46013	P46013	3	3	3	Antigen KI-67	MKI67	sp|P46013|KI67_HUMAN Proliferation marker protein Ki-67 OS=Homo sapiens OX=9606 GN=MKI67 PE=1 SV=2	1	3	3	3	0	2	2	1	0	1	0	2	2	1	0	1	0	2	2	1	0	1	2	2	2	358.69	3256	3256	0	2.4516		By MS/MS	By MS/MS	By MS/MS		By MS/MS	0	1.3	1.5	0.5	0	0.7
Q9UL63;C9J7E8;F8WEY7	Q9UL63;C9J7E8	4;3;1	4;3;1	4;3;1	Muskelin	MKLN1	sp|Q9UL63|MKLN1_HUMAN Muskelin OS=Homo sapiens OX=9606 GN=MKLN1 PE=1 SV=2;tr|C9J7E8|C9J7E8_HUMAN Muskelin OS=Homo sapiens OX=9606 GN=MKLN1 PE=1 SV=1	3	4	4	4	0	0	4	1	0	2	0	0	4	1	0	2	0	0	4	1	0	2	9.9	9.9	9.9	84.767	735	735;643;170	0	18.958			By MS/MS	By matching		By MS/MS	0	0	9.9	2.6	0	3.9
C9JYX8;C9J031;C9IY57;Q9UHC7	C9JYX8;C9J031;C9IY57;Q9UHC7	1;1;1;1	1;1;1;1	1;1;1;1	E3 ubiquitin-protein ligase makorin-1	MKRN1	tr|C9JYX8|C9JYX8_HUMAN E3 ubiquitin-protein ligase makorin-1 (Fragment) OS=Homo sapiens OX=9606 GN=MKRN1 PE=1 SV=1;tr|C9J031|C9J031_HUMAN E3 ubiquitin-protein ligase makorin-1 (Fragment) OS=Homo sapiens OX=9606 GN=MKRN1 PE=1 SV=1;tr|C9IY57|C9IY57_HUMAN E3	4	1	1	1	0	0	0	0	0	1	0	0	0	0	0	1	0	0	0	0	0	1	21.3	21.3	21.3	14.746	136	136;165;193;482	0	23.453						By MS/MS	0	0	0	0	0	21.3
Q13434	Q13434	1	1	1	Putative E3 ubiquitin-protein ligase makorin-4	MKRN4P	sp|Q13434|MKRN4_HUMAN Putative E3 ubiquitin-protein ligase makorin-4 OS=Homo sapiens OX=9606 GN=MKRN4P PE=5 SV=1	1	1	1	1	0	0	1	0	0	1	0	0	1	0	0	1	0	0	1	0	0	1	5.6	5.6	5.6	52.909	485	485	0.00088889	1.7009			By MS/MS			By MS/MS	0	0	5.6	0	0	5.6
Q15773	Q15773	4	4	4	Myeloid leukemia factor 2	MLF2	sp|Q15773|MLF2_HUMAN Myeloid leukemia factor 2 OS=Homo sapiens OX=9606 GN=MLF2 PE=1 SV=1	1	4	4	4	0	1	1	0	1	4	0	1	1	0	1	4	0	1	1	0	1	4	19.8	19.8	19.8	28.147	248	248	0	2.4694		By matching	By MS/MS		By MS/MS	By MS/MS	0	4	10.9	0	4	19.8
Q13015	Q13015	1	1	1	Protein AF1q	MLLT11	sp|Q13015|AF1Q_HUMAN Protein AF1q OS=Homo sapiens OX=9606 GN=MLLT11 PE=1 SV=1	1	1	1	1	0	0	0	0	0	0	0	0	0	0	0	0	0	0	0	0	0	0	15.6	15.6	15.6	10.061	90	90	0.0056022	1.154							0	0	0	0	0	0
Q9BVC4;H3BR38;H3BM50;H3BPU5;H3BR25;H3BPT1;H3BN58;H3BSZ4;A0A0A0MR05	Q9BVC4;H3BR38;H3BM50;H3BPU5;H3BR25;H3BPT1;H3BN58;H3BSZ4;A0A0A0MR05	2;1;1;1;1;1;1;1;1	2;1;1;1;1;1;1;1;1	2;1;1;1;1;1;1;1;1	Target of rapamycin complex subunit LST8	MLST8	sp|Q9BVC4|LST8_HUMAN Target of rapamycin complex subunit LST8 OS=Homo sapiens OX=9606 GN=MLST8 PE=1 SV=1;tr|H3BR38|H3BR38_HUMAN Target of rapamycin complex subunit LST8 OS=Homo sapiens OX=9606 GN=MLST8 PE=1 SV=1;tr|H3BM50|H3BM50_HUMAN G protein beta subuni	9	2	2	2	1	0	0	1	0	0	1	0	0	1	0	0	1	0	0	1	0	0	8.9	8.9	8.9	35.876	326	326;72;116;131;166;198;202;275;327	0	2.9621	By matching			By matching			5.5	0	0	5.5	0	0
A0A0C4DGU2;Q9Y4U1	A0A0C4DGU2;Q9Y4U1	1;1	1;1	1;1	Methylmalonic aciduria and homocystinuria type C protein	MMACHC	tr|A0A0C4DGU2|A0A0C4DGU2_HUMAN Alkylcobalamin:glutathione S-alkyltransferase OS=Homo sapiens OX=9606 GN=MMACHC PE=1 SV=1;sp|Q9Y4U1|MMAC_HUMAN Cyanocobalamin reductase / alkylcobalamin dealkylase OS=Homo sapiens OX=9606 GN=MMACHC PE=1 SV=3	2	1	1	1	0	0	0	0	0	0	0	0	0	0	0	0	0	0	0	0	0	0	5.3	5.3	5.3	25.331	225	225;282	0.0021692	1.5209							0	0	0	0	0	0
P03956	P03956	1	1	1	Interstitial collagenase;22 kDa interstitial collagenase;27 kDa interstitial collagenase	MMP1	sp|P03956|MMP1_HUMAN Interstitial collagenase OS=Homo sapiens OX=9606 GN=MMP1 PE=1 SV=3	1	1	1	1	0	0	1	0	0	1	0	0	1	0	0	1	0	0	1	0	0	1	3.4	3.4	3.4	54.006	469	469	1	-2			By MS/MS			By MS/MS	0	0	3.4	0	0	3.4
P51948;H0YJ92;H0YJF2	P51948;H0YJ92	5;4;2	5;4;2	5;4;2	CDK-activating kinase assembly factor MAT1	MNAT1	sp|P51948|MAT1_HUMAN CDK-activating kinase assembly factor MAT1 OS=Homo sapiens OX=9606 GN=MNAT1 PE=1 SV=1;tr|H0YJ92|H0YJ92_HUMAN CDK-activating kinase assembly factor MAT1 (Fragment) OS=Homo sapiens OX=9606 GN=MNAT1 PE=1 SV=1	3	5	5	5	0	2	2	2	1	4	0	2	2	2	1	4	0	2	2	2	1	4	27.8	27.8	27.8	35.823	309	309;169;173	0	10.82		By matching	By MS/MS	By matching	By matching	By MS/MS	0	7.8	11.3	7.8	2.6	20.1
P41218	P41218	1	1	1	Myeloid cell nuclear differentiation antigen	MNDA	sp|P41218|MNDA_HUMAN Myeloid cell nuclear differentiation antigen OS=Homo sapiens OX=9606 GN=MNDA PE=1 SV=1	1	1	1	1	1	0	0	0	0	1	1	0	0	0	0	1	1	0	0	0	0	1	2	2	2	45.836	407	407	1	-2	By MS/MS					By MS/MS	2	0	0	0	0	2
O95396	O95396	3	3	3	Adenylyltransferase and sulfurtransferase MOCS3;Molybdopterin-synthase adenylyltransferase;Molybdopterin-synthase sulfurtransferase	MOCS3	sp|O95396|MOCS3_HUMAN Adenylyltransferase and sulfurtransferase MOCS3 OS=Homo sapiens OX=9606 GN=MOCS3 PE=1 SV=1	1	3	3	3	0	0	1	0	0	0	0	0	1	0	0	0	0	0	1	0	0	0	11.3	11.3	11.3	49.669	460	460	0	7.559			By matching				0	0	3.7	0	0	0
Q9HCE1;Q5JR04	Q9HCE1;Q5JR04	14;13	14;13	14;13	Putative helicase MOV-10	MOV10	sp|Q9HCE1|MOV10_HUMAN Helicase MOV-10 OS=Homo sapiens OX=9606 GN=MOV10 PE=1 SV=2;tr|Q5JR04|Q5JR04_HUMAN RNA helicase OS=Homo sapiens OX=9606 GN=MOV10 PE=1 SV=1	2	14	14	14	0	1	7	2	0	7	0	1	7	2	0	7	0	1	7	2	0	7	19.4	19.4	19.4	113.67	1003	1003;947	0	22.453		By matching	By MS/MS	By MS/MS		By MS/MS	0	0.9	10.9	2.2	0	9.8
A2IDA3;P29372	A2IDA3;P29372	1;1	1;1	1;1	DNA-3-methyladenine glycosylase	MPG	tr|A2IDA3|A2IDA3_HUMAN 3-methyladenine DNA glycosidase (Fragment) OS=Homo sapiens OX=9606 GN=MPG PE=1 SV=1;sp|P29372|3MG_HUMAN DNA-3-methyladenine glycosylase OS=Homo sapiens OX=9606 GN=MPG PE=1 SV=3	2	1	1	1	0	0	1	0	0	1	0	0	1	0	0	1	0	0	1	0	0	1	6	6	6	27.295	251	251;298	0	4.6474			By matching			By MS/MS	0	0	6	0	0	6
Q8N3R9;G3V2H1	Q8N3R9;G3V2H1	2;1	2;1	2;1	MAGUK p55 subfamily member 5	MPP5	sp|Q8N3R9|PALS1_HUMAN Protein PALS1 OS=Homo sapiens OX=9606 GN=PALS1 PE=1 SV=3;tr|G3V2H1|G3V2H1_HUMAN Protein-associated with LIN7 1, MAGUK family member (Fragment) OS=Homo sapiens OX=9606 GN=PALS1 PE=1 SV=1	2	2	2	2	0	0	1	0	1	2	0	0	1	0	1	2	0	0	1	0	1	2	4.4	4.4	4.4	77.293	675	675;149	0	2.7368			By MS/MS		By matching	By MS/MS	0	0	2.7	0	2.7	4.4
Q9NZW5;B8ZZG1;C9J4Q3	Q9NZW5;B8ZZG1;C9J4Q3	2;2;1	2;2;1	2;2;1	MAGUK p55 subfamily member 6	MPP6	sp|Q9NZW5|PALS2_HUMAN Protein PALS2 OS=Homo sapiens OX=9606 GN=PALS2 PE=1 SV=2;tr|B8ZZG1|B8ZZG1_HUMAN Membrane protein, palmitoylated 6 (MAGUK p55 subfamily member 6), isoform CRA_a OS=Homo sapiens OX=9606 GN=PALS2 PE=1 SV=1;tr|C9J4Q3|C9J4Q3_HUMAN Protein-	3	2	2	2	0	0	2	0	0	0	0	0	2	0	0	0	0	0	2	0	0	0	5.2	5.2	5.2	61.116	540	540;428;307	0.0021901	1.5746			By MS/MS				0	0	5.2	0	0	0
Q9NV56	Q9NV56	1	1	1	MRG/MORF4L-binding protein	MRGBP	sp|Q9NV56|MRGBP_HUMAN MRG/MORF4L-binding protein OS=Homo sapiens OX=9606 GN=MRGBP PE=1 SV=1	1	1	1	1	0	0	1	0	0	0	0	0	1	0	0	0	0	0	1	0	0	0	6.4	6.4	6.4	22.417	204	204	0.0025907	1.4875			By matching				0	0	6.4	0	0	0
B4DLN1;P52815	B4DLN1;P52815	1;1	1;1	1;1	39S ribosomal protein L12, mitochondrial	MRPL12	tr|B4DLN1|B4DLN1_HUMAN cDNA FLJ60124, highly similar to Mitochondrial dicarboxylate carrier OS=Homo sapiens OX=9606 PE=2 SV=1;sp|P52815|RM12_HUMAN 39S ribosomal protein L12, mitochondrial OS=Homo sapiens OX=9606 GN=MRPL12 PE=1 SV=2	2	1	1	1	0	0	1	0	0	0	0	0	1	0	0	0	0	0	1	0	0	0	2.7	2.7	2.7	48.099	442	442;198	0.008836	0.99445			By MS/MS				0	0	2.7	0	0	0
H3BUY0;Q7Z2W9	H3BUY0;Q7Z2W9	1;1	1;1	1;1	39S ribosomal protein L21, mitochondrial	MRPL21	tr|H3BUY0|H3BUY0_HUMAN 39S ribosomal protein L21, mitochondrial OS=Homo sapiens OX=9606 GN=MRPL21 PE=1 SV=1;sp|Q7Z2W9|RM21_HUMAN 39S ribosomal protein L21, mitochondrial OS=Homo sapiens OX=9606 GN=MRPL21 PE=1 SV=2	2	1	1	1	0	0	0	0	0	0	0	0	0	0	0	0	0	0	0	0	0	0	9.7	9.7	9.7	21.526	195	195;205	0.0052653	1.2008							0	0	0	0	0	0
Q13084;A2IDC6;A2IDC7;Q4TT37	Q13084;A2IDC6	3;2;1;1	3;2;1;1	3;2;1;1	39S ribosomal protein L28, mitochondrial	MRPL28	sp|Q13084|RM28_HUMAN 39S ribosomal protein L28, mitochondrial OS=Homo sapiens OX=9606 GN=MRPL28 PE=1 SV=4;tr|A2IDC6|A2IDC6_HUMAN 39S ribosomal protein L28, mitochondrial (Fragment) OS=Homo sapiens OX=9606 GN=MRPL28 PE=1 SV=1	4	3	3	3	0	0	2	0	0	3	0	0	2	0	0	3	0	0	2	0	0	3	21.1	21.1	21.1	30.156	256	256;240;194;218	0	47.218			By MS/MS			By MS/MS	0	0	11.7	0	0	21.1
Q96DV4	Q96DV4	4	4	4	39S ribosomal protein L38, mitochondrial	MRPL38	sp|Q96DV4|RM38_HUMAN 39S ribosomal protein L38, mitochondrial OS=Homo sapiens OX=9606 GN=MRPL38 PE=1 SV=2	1	4	4	4	0	1	2	0	1	3	0	1	2	0	1	3	0	1	2	0	1	3	12.6	12.6	12.6	44.596	380	380	0	4.6378		By matching	By MS/MS		By matching	By MS/MS	0	3.4	4.7	0	3.4	9.2
C9JG87;Q9NYK5	C9JG87;Q9NYK5	2;2	2;2	2;2	39S ribosomal protein L39, mitochondrial	MRPL39	tr|C9JG87|C9JG87_HUMAN 39S ribosomal protein L39, mitochondrial (Fragment) OS=Homo sapiens OX=9606 GN=MRPL39 PE=1 SV=1;sp|Q9NYK5|RM39_HUMAN 39S ribosomal protein L39, mitochondrial OS=Homo sapiens OX=9606 GN=MRPL39 PE=1 SV=3	2	2	2	2	0	0	1	0	0	0	0	0	1	0	0	0	0	0	1	0	0	0	7.1	7.1	7.1	34.032	297	297;338	0.0021796	1.558			By MS/MS				0	0	3.4	0	0	0
K7EKI4;K7ELF1;K7ELQ0;K7ES61;X6RAY8;Q9BYD3	K7EKI4;K7ELF1;K7ELQ0;K7ES61;X6RAY8;Q9BYD3	1;1;1;1;1;1	1;1;1;1;1;1	1;1;1;1;1;1	39S ribosomal protein L4, mitochondrial	MRPL4	tr|K7EKI4|K7EKI4_HUMAN 39S ribosomal protein L4, mitochondrial OS=Homo sapiens OX=9606 GN=MRPL4 PE=1 SV=1;tr|K7ELF1|K7ELF1_HUMAN 39S ribosomal protein L4, mitochondrial (Fragment) OS=Homo sapiens OX=9606 GN=MRPL4 PE=1 SV=1;tr|K7ELQ0|K7ELQ0_HUMAN 39S riboso	6	1	1	1	0	0	1	0	0	1	0	0	1	0	0	1	0	0	1	0	0	1	12.6	12.6	12.6	14.056	127	127;163;220;300;357;311	0.002574	1.4518			By MS/MS			By matching	0	0	12.6	0	0	12.6
H0Y6Y8;B1AL05;Q8N983;H0YBU8;M0R051	H0Y6Y8;B1AL05;Q8N983;H0YBU8	3;3;3;2;1	3;3;3;2;1	3;3;3;2;1	39S ribosomal protein L43, mitochondrial	MRPL43	tr|H0Y6Y8|H0Y6Y8_HUMAN 39S ribosomal protein L43, mitochondrial (Fragment) OS=Homo sapiens OX=9606 GN=MRPL43 PE=1 SV=1;tr|B1AL05|B1AL05_HUMAN 39S ribosomal protein L43, mitochondrial OS=Homo sapiens OX=9606 GN=MRPL43 PE=1 SV=1;sp|Q8N983|RM43_HUMAN 39S ribo	5	3	3	3	0	0	1	0	0	2	0	0	1	0	0	2	0	0	1	0	0	2	20.1	20.1	20.1	18.657	169	169;184;215;148;44	0	2.4802			By MS/MS			By MS/MS	0	0	6.5	0	0	13
Q9H9J2	Q9H9J2	2	2	2	39S ribosomal protein L44, mitochondrial	MRPL44	sp|Q9H9J2|RM44_HUMAN 39S ribosomal protein L44, mitochondrial OS=Homo sapiens OX=9606 GN=MRPL44 PE=1 SV=1	1	2	2	2	0	0	2	0	0	1	0	0	2	0	0	1	0	0	2	0	0	1	10.8	10.8	10.8	37.535	332	332	0	11.104			By MS/MS			By matching	0	0	10.8	0	0	5.7
Q9HD33	Q9HD33	1	1	1	39S ribosomal protein L47, mitochondrial	MRPL47	sp|Q9HD33|RM47_HUMAN 39S ribosomal protein L47, mitochondrial OS=Homo sapiens OX=9606 GN=MRPL47 PE=1 SV=2	1	1	1	1	0	0	0	0	0	0	0	0	0	0	0	0	0	0	0	0	0	0	4.8	4.8	4.8	29.45	250	250	0.00045977	1.9275							0	0	0	0	0	0
Q13405;E9PI78;H0YDP7;E9PNF1	Q13405;E9PI78;H0YDP7;E9PNF1	2;1;1;1	2;1;1;1	2;1;1;1	39S ribosomal protein L49, mitochondrial	MRPL49	sp|Q13405|RM49_HUMAN 39S ribosomal protein L49, mitochondrial OS=Homo sapiens OX=9606 GN=MRPL49 PE=1 SV=1;tr|E9PI78|E9PI78_HUMAN 39S ribosomal protein L49, mitochondrial OS=Homo sapiens OX=9606 GN=MRPL49 PE=1 SV=1;tr|H0YDP7|H0YDP7_HUMAN 39S ribosomal prote	4	2	2	2	1	1	1	1	1	1	1	1	1	1	1	1	1	1	1	1	1	1	16.3	16.3	16.3	19.198	166	166;99;127;140	0	5.8562	By MS/MS	By MS/MS	By MS/MS	By MS/MS	By MS/MS	By matching	7.8	7.8	8.4	7.8	7.8	7.8
Q8N5N7	Q8N5N7	1	1	1	39S ribosomal protein L50, mitochondrial	MRPL50	sp|Q8N5N7|RM50_HUMAN 39S ribosomal protein L50, mitochondrial OS=Homo sapiens OX=9606 GN=MRPL50 PE=1 SV=2	1	1	1	1	0	0	0	0	0	0	0	0	0	0	0	0	0	0	0	0	0	0	12	12	12	18.325	158	158	0	3.1313							0	0	0	0	0	0
P82664	P82664	3	3	3	28S ribosomal protein S10, mitochondrial	MRPS10	sp|P82664|RT10_HUMAN 28S ribosomal protein S10, mitochondrial OS=Homo sapiens OX=9606 GN=MRPS10 PE=1 SV=2	1	3	3	3	0	0	2	0	0	1	0	0	2	0	0	1	0	0	2	0	0	1	24.9	24.9	24.9	22.999	201	201	0	3.6448			By MS/MS			By matching	0	0	15.4	0	0	9.5
O15235	O15235	3	3	3	28S ribosomal protein S12, mitochondrial	MRPS12	sp|O15235|RT12_HUMAN 28S ribosomal protein S12, mitochondrial OS=Homo sapiens OX=9606 GN=MRPS12 PE=1 SV=1	1	3	3	3	0	0	2	0	0	2	0	0	2	0	0	2	0	0	2	0	0	2	33.3	33.3	33.3	15.173	138	138	0	8.051			By MS/MS			By MS/MS	0	0	24.6	0	0	26.8
Q9Y3D3	Q9Y3D3	1	1	1	28S ribosomal protein S16, mitochondrial	MRPS16	sp|Q9Y3D3|RT16_HUMAN 28S ribosomal protein S16, mitochondrial OS=Homo sapiens OX=9606 GN=MRPS16 PE=1 SV=1	1	1	1	1	0	1	0	1	0	0	0	1	0	1	0	0	0	1	0	1	0	0	16.8	16.8	16.8	15.345	137	137	0	3.4509		By MS/MS		By matching			0	16.8	0	16.8	0	0
E9PE17;I3L0E3;Q9Y2R5	E9PE17;I3L0E3;Q9Y2R5	2;2;2	2;2;2	2;2;2	28S ribosomal protein S17, mitochondrial	MRPS17;hCG_1984214	tr|E9PE17|E9PE17_HUMAN 28S ribosomal protein S17, mitochondrial (Fragment) OS=Homo sapiens OX=9606 GN=MRPS17 PE=1 SV=1;tr|I3L0E3|I3L0E3_HUMAN HCG1984214, isoform CRA_a OS=Homo sapiens OX=9606 GN=hCG_1984214 PE=3 SV=1;sp|Q9Y2R5|RT17_HUMAN 28S ribosomal prot	3	2	2	2	0	0	1	0	0	1	0	0	1	0	0	1	0	0	1	0	0	1	38	38	38	14.374	129	129;225;130	0	13.673			By MS/MS			By MS/MS	0	0	22.5	0	0	22.5
Q9Y3D5	Q9Y3D5	1	1	1	28S ribosomal protein S18c, mitochondrial	MRPS18C	sp|Q9Y3D5|RT18C_HUMAN 28S ribosomal protein S18c, mitochondrial OS=Homo sapiens OX=9606 GN=MRPS18C PE=1 SV=1	1	1	1	1	0	0	1	0	0	1	0	0	1	0	0	1	0	0	1	0	0	1	13.4	13.4	13.4	15.85	142	142	0	79.87			By MS/MS			By MS/MS	0	0	13.4	0	0	13.4
J3QLR8;Q9Y3D9	J3QLR8;Q9Y3D9	1;1	1;1	1;1	28S ribosomal protein S23, mitochondrial	MRPS23	tr|J3QLR8|J3QLR8_HUMAN 28S ribosomal protein S23, mitochondrial OS=Homo sapiens OX=9606 GN=MRPS23 PE=1 SV=1;sp|Q9Y3D9|RT23_HUMAN 28S ribosomal protein S23, mitochondrial OS=Homo sapiens OX=9606 GN=MRPS23 PE=1 SV=2	2	1	1	1	0	0	1	0	0	0	0	0	1	0	0	0	0	0	1	0	0	0	7.2	7.2	7.2	17.517	152	152;190	0.0045027	1.2324			By MS/MS				0	0	7.2	0	0	0
P82663	P82663	1	1	1	28S ribosomal protein S25, mitochondrial	MRPS25	sp|P82663|RT25_HUMAN 28S ribosomal protein S25, mitochondrial OS=Homo sapiens OX=9606 GN=MRPS25 PE=1 SV=1	1	1	1	1	0	0	1	0	0	1	0	0	1	0	0	1	0	0	1	0	0	1	11.6	11.6	11.6	20.116	173	173	0	30.47			By MS/MS			By MS/MS	0	0	11.6	0	0	11.6
D6RH20;G5EA06;Q92552;D6RJC7	D6RH20;G5EA06;Q92552	5;5;5;2	5;5;5;2	5;5;5;2	28S ribosomal protein S27, mitochondrial	MRPS27	tr|D6RH20|D6RH20_HUMAN 28S ribosomal protein S27, mitochondrial (Fragment) OS=Homo sapiens OX=9606 GN=MRPS27 PE=1 SV=1;tr|G5EA06|G5EA06_HUMAN 28S ribosomal protein S27, mitochondrial OS=Homo sapiens OX=9606 GN=MRPS27 PE=1 SV=1;sp|Q92552|RT27_HUMAN 28S ribo	4	5	5	5	0	0	2	0	0	3	0	0	2	0	0	3	0	0	2	0	0	3	21.7	21.7	21.7	34.458	299	299;358;414;197	0	23.577			By MS/MS			By MS/MS	0	0	7.7	0	0	11.7
C9JJ19;P82930	C9JJ19;P82930	3;3	3;3	3;3	28S ribosomal protein S34, mitochondrial	MRPS34	tr|C9JJ19|C9JJ19_HUMAN 28S ribosomal protein S34, mitochondrial OS=Homo sapiens OX=9606 GN=MRPS34 PE=1 SV=2;sp|P82930|RT34_HUMAN 28S ribosomal protein S34, mitochondrial OS=Homo sapiens OX=9606 GN=MRPS34 PE=1 SV=2	2	3	3	3	0	0	2	0	0	1	0	0	2	0	0	1	0	0	2	0	0	1	15.6	15.6	15.6	26.332	225	225;218	0	13.11			By MS/MS			By MS/MS	0	0	8.9	0	0	8.4
P82673;H0YG82	P82673;H0YG82	4;3	4;3	4;3	28S ribosomal protein S35, mitochondrial	MRPS35	sp|P82673|RT35_HUMAN 28S ribosomal protein S35, mitochondrial OS=Homo sapiens OX=9606 GN=MRPS35 PE=1 SV=1;tr|H0YG82|H0YG82_HUMAN 28S ribosomal protein S35, mitochondrial (Fragment) OS=Homo sapiens OX=9606 GN=MRPS35 PE=1 SV=1	2	4	4	4	0	0	3	0	0	2	0	0	3	0	0	2	0	0	3	0	0	2	13.3	13.3	13.3	36.844	323	323;162	0	5.5332			By MS/MS			By MS/MS	0	0	7.4	0	0	7.4
H0YI08;Q9Y6F6	H0YI08;Q9Y6F6	1;1	1;1	1;1	Protein MRVI1	MRVI1	tr|H0YI08|H0YI08_HUMAN Inositol 1,4,5-triphosphate receptor-associated 1 OS=Homo sapiens OX=9606 GN=IRAG1 PE=1 SV=1;sp|Q9Y6F6|IRAG1_HUMAN Inositol 1,4,5-triphosphate receptor associated 1 OS=Homo sapiens OX=9606 GN=IRAG1 PE=1 SV=4	2	1	1	1	0	0	1	0	0	1	0	0	1	0	0	1	0	0	1	0	0	1	2.6	2.6	2.6	89.691	821	821;904	0.0077912	1.0533			By MS/MS			By MS/MS	0	0	2.6	0	0	2.6
A0A2R8Y7S8;A0A2R8YFH0;E9PHA6;A0A2R8Y6P0;A0A2R8YG02;P43246	A0A2R8Y7S8;A0A2R8YFH0;E9PHA6;A0A2R8Y6P0;A0A2R8YG02;P43246	1;1;1;1;1;1	1;1;1;1;1;1	1;1;1;1;1;1	DNA mismatch repair protein Msh2	MSH2	tr|A0A2R8Y7S8|A0A2R8Y7S8_HUMAN DNA mismatch repair protein Msh2 OS=Homo sapiens OX=9606 GN=MSH2 PE=1 SV=1;tr|A0A2R8YFH0|A0A2R8YFH0_HUMAN DNA mismatch repair protein OS=Homo sapiens OX=9606 GN=MSH2 PE=1 SV=1;tr|E9PHA6|E9PHA6_HUMAN DNA mismatch repair protei	6	1	1	1	0	0	0	0	0	0	0	0	0	0	0	0	0	0	0	0	0	0	2.5	2.5	2.5	63.193	558	558;918;921;924;938;934	0.00090539	1.8283							0	0	0	0	0	0
O15457	O15457	1	1	1	MutS protein homolog 4	MSH4	sp|O15457|MSH4_HUMAN MutS protein homolog 4 OS=Homo sapiens OX=9606 GN=MSH4 PE=1 SV=2	1	1	1	1	0	0	0	0	0	0	0	0	0	0	0	0	0	0	0	0	0	0	1.1	1.1	1.1	104.75	936	936	1	-2							0	0	0	0	0	0
A0A087WWJ1;A0A494C0M1;P52701	A0A087WWJ1;A0A494C0M1;P52701	1;1;1	1;1;1	1;1;1	DNA mismatch repair protein Msh6	MSH6	tr|A0A087WWJ1|A0A087WWJ1_HUMAN DNA mismatch repair protein Msh6 OS=Homo sapiens OX=9606 GN=MSH6 PE=1 SV=1;tr|A0A494C0M1|A0A494C0M1_HUMAN DNA mismatch repair protein OS=Homo sapiens OX=9606 GN=MSH6 PE=1 SV=1;sp|P52701|MSH6_HUMAN DNA mismatch repair protein	3	1	1	1	0	0	0	0	0	0	0	0	0	0	0	0	0	0	0	0	0	0	1.1	1.1	1.1	121.12	1067	1067;1261;1360	0.0029461	1.3706							0	0	0	0	0	0
P26038;V9GZ54	P26038	10;2	5;1	5;1	Moesin	MSN	sp|P26038|MOES_HUMAN Moesin OS=Homo sapiens OX=9606 GN=MSN PE=1 SV=3	2	10	5	5	1	2	6	1	1	5	0	1	2	0	0	1	0	1	2	0	0	1	20.1	14	14	67.819	577	577;103	0	64.691	By matching	By matching	By MS/MS	By matching	By matching	By MS/MS	1.6	3.3	9.2	1.6	1.6	6.9
E7ESY4;Q13330;H0Y4T7;F8W9Y9;H7C3F3	E7ESY4;Q13330;H0Y4T7	18;18;10;5;3	15;15;9;5;1	11;11;8;5;1	Metastasis-associated protein MTA1	MTA1	tr|E7ESY4|E7ESY4_HUMAN Metastasis-associated protein MTA1 OS=Homo sapiens OX=9606 GN=MTA1 PE=1 SV=1;sp|Q13330|MTA1_HUMAN Metastasis-associated protein MTA1 OS=Homo sapiens OX=9606 GN=MTA1 PE=1 SV=2;tr|H0Y4T7|H0Y4T7_HUMAN Metastasis-associated protein MTA1	5	18	15	11	2	2	7	3	3	13	1	1	5	1	1	10	0	0	4	0	0	7	28.7	26.6	20.6	79.372	703	703;715;511;255;55	0	82.583	By MS/MS	By matching	By MS/MS	By MS/MS	By MS/MS	By MS/MS	4.1	4	14.2	6.3	6.3	19.8
E7EQY4;E7EV10;Q9BTC8;E9PCS8;F6RRE2;E9PF88;H0YIT0	E7EQY4;E7EV10;Q9BTC8;E9PCS8;F6RRE2	16;16;16;13;13;3;2	8;8;8;5;7;1;0	8;8;8;5;7;1;0	Metastasis-associated protein MTA3	MTA3	tr|E7EQY4|E7EQY4_HUMAN Metastasis-associated protein MTA3 OS=Homo sapiens OX=9606 GN=MTA3 PE=1 SV=1;tr|E7EV10|E7EV10_HUMAN Metastasis-associated protein MTA3 OS=Homo sapiens OX=9606 GN=MTA3 PE=1 SV=1;sp|Q9BTC8|MTA3_HUMAN Metastasis-associated protein MTA3	7	16	8	8	3	3	9	2	3	12	1	1	6	0	0	5	1	1	6	0	0	5	30.9	18.3	18.3	58.726	514	514;590;594;392;537;91;57	0	27.392	By MS/MS	By matching	By MS/MS	By matching	By matching	By MS/MS	8.2	7.6	22.8	5.4	6.8	23
E9PLD2;Q9H019;E9PPQ0;C9JF50;E9PPF9;E9PLU1;E9PRK5	E9PLD2;Q9H019;E9PPQ0;C9JF50;E9PPF9;E9PLU1;E9PRK5	2;2;1;1;1;1;1	2;2;1;1;1;1;1	2;2;1;1;1;1;1	Mitochondrial fission regulator 1-like	MTFR1L	tr|E9PLD2|E9PLD2_HUMAN Mitochondrial fission regulator 1-like OS=Homo sapiens OX=9606 GN=MTFR1L PE=1 SV=1;sp|Q9H019|MFR1L_HUMAN Mitochondrial fission regulator 1-like OS=Homo sapiens OX=9606 GN=MTFR1L PE=1 SV=2;tr|E9PPQ0|E9PPQ0_HUMAN Mitochondrial fission	7	2	2	2	0	0	1	0	0	1	0	0	1	0	0	1	0	0	1	0	0	1	14.9	14.9	14.9	21.191	195	195;292;53;152;160;170;182	0	2.7131			By MS/MS			By MS/MS	0	0	6.2	0	0	8.7
A0A087WVM4;B7ZM99;Q6UB35;Q4VXM1;Q4VXM0	A0A087WVM4;B7ZM99;Q6UB35	3;3;3;1;1	2;2;2;1;1	2;2;2;1;1	Monofunctional C1-tetrahydrofolate synthase, mitochondrial	MTHFD1L	tr|A0A087WVM4|A0A087WVM4_HUMAN Formyltetrahydrofolate synthetase OS=Homo sapiens OX=9606 GN=MTHFD1L PE=1 SV=1;tr|B7ZM99|B7ZM99_HUMAN Formyltetrahydrofolate synthetase OS=Homo sapiens OX=9606 GN=MTHFD1L PE=1 SV=1;sp|Q6UB35|C1TM_HUMAN Monofunctional C1-tetra	5	3	2	2	0	0	0	0	0	3	0	0	0	0	0	2	0	0	0	0	0	2	3.7	2.6	2.6	99.31	913	913;979;978;57;92	0.0095166	0.96459						By MS/MS	0	0	0	0	0	3.7
Q9C0I1	Q9C0I1	1	1	1	Myotubularin-related protein 12	MTMR12	sp|Q9C0I1|MTMRC_HUMAN Myotubularin-related protein 12 OS=Homo sapiens OX=9606 GN=MTMR12 PE=1 SV=2	1	1	1	1	0	0	0	0	0	1	0	0	0	0	0	1	0	0	0	0	0	1	1.6	1.6	1.6	86.147	747	747	0.0004717	2.1305						By MS/MS	0	0	0	0	0	1.6
Q8NCE2;B4DJ23;C9JSR1	Q8NCE2	3;1;1	3;1;1	3;1;1	Myotubularin-related protein 14	MTMR14	sp|Q8NCE2|MTMRE_HUMAN Myotubularin-related protein 14 OS=Homo sapiens OX=9606 GN=MTMR14 PE=1 SV=2	3	3	3	3	0	1	2	1	0	2	0	1	2	1	0	2	0	1	2	1	0	2	6	6	6	72.203	650	650;188;292	0	5.3053		By MS/MS	By MS/MS	By matching		By MS/MS	0	2.9	4.3	1.7	0	4.3
A0A6Q8PHS7;A0A6Q8PGS5;C9JEX3;Q13614;A0A6Q8PHL9;A0A6Q8PGV9	A0A6Q8PHS7;A0A6Q8PGS5;C9JEX3;Q13614;A0A6Q8PHL9	3;3;3;3;2;1	3;3;3;3;2;1	3;3;3;3;2;1	Myotubularin-related protein 2	MTMR2	tr|A0A6Q8PHS7|A0A6Q8PHS7_HUMAN Phosphatidylinositol-3,5-bisphosphate 3-phosphatase OS=Homo sapiens OX=9606 GN=MTMR2 PE=1 SV=1;tr|A0A6Q8PGS5|A0A6Q8PGS5_HUMAN Phosphatidylinositol-3,5-bisphosphate 3-phosphatase OS=Homo sapiens OX=9606 GN=MTMR2 PE=1 SV=1;tr|C	6	3	3	3	0	0	3	0	0	3	0	0	3	0	0	3	0	0	3	0	0	3	8.2	8.2	8.2	60.996	527	527;540;556;643;581;225	0	3.5084			By MS/MS			By MS/MS	0	0	8.2	0	0	8.2
Q9Y217	Q9Y217	2	2	2	Myotubularin-related protein 6	MTMR6	sp|Q9Y217|MTMR6_HUMAN Myotubularin-related protein 6 OS=Homo sapiens OX=9606 GN=MTMR6 PE=1 SV=3	1	2	2	2	0	0	0	1	0	1	0	0	0	1	0	1	0	0	0	1	0	1	5.3	5.3	5.3	71.967	621	621	0	6.0345				By matching		By matching	0	0	0	2.4	0	2.4
Q96QG7;E9PR67	Q96QG7	5;2	5;2	5;2	Myotubularin-related protein 9	MTMR9	sp|Q96QG7|MTMR9_HUMAN Myotubularin-related protein 9 OS=Homo sapiens OX=9606 GN=MTMR9 PE=1 SV=1	2	5	5	5	0	1	4	1	0	3	0	1	4	1	0	3	0	1	4	1	0	3	15.1	15.1	15.1	63.461	549	549;101	0	7.9201		By MS/MS	By MS/MS	By MS/MS		By MS/MS	0	2	11.5	2	0	9.5
A0A494C064;A0A494C1A2;A0A7P0TAV2;A0A6Q8PGK3;A0A7P0TAJ0;A0A7P0T9G7;Q99707	A0A494C064;A0A494C1A2;A0A7P0TAV2;A0A6Q8PGK3;A0A7P0TAJ0;A0A7P0T9G7;Q99707	1;1;1;1;1;1;1	1;1;1;1;1;1;1	1;1;1;1;1;1;1	Methionine synthase	MTR	tr|A0A494C064|A0A494C064_HUMAN Methionine synthase OS=Homo sapiens OX=9606 GN=MTR PE=1 SV=1;tr|A0A494C1A2|A0A494C1A2_HUMAN Methionine synthase OS=Homo sapiens OX=9606 GN=MTR PE=1 SV=1;tr|A0A7P0TAV2|A0A7P0TAV2_HUMAN Methionine synthase OS=Homo sapiens OX=96	7	1	1	1	0	0	0	0	0	0	0	0	0	0	0	0	0	0	0	0	0	0	4.9	4.9	4.9	29.229	264	264;380;1119;1149;1202;1205;1265	0.0045137	1.2419							0	0	0	0	0	0
Q8N6Z2;A0A087X1S1;X6RFD4;O75570	Q8N6Z2;A0A087X1S1;X6RFD4;O75570	1;1;1;1	1;1;1;1	1;1;1;1	Peptide chain release factor 1, mitochondrial	MTRF1	tr|Q8N6Z2|Q8N6Z2_HUMAN MTRF1 protein OS=Homo sapiens OX=9606 GN=MTRF1 PE=1 SV=1;tr|A0A087X1S1|A0A087X1S1_HUMAN Peptide chain release factor 1, mitochondrial OS=Homo sapiens OX=9606 GN=MTRF1 PE=1 SV=1;tr|X6RFD4|X6RFD4_HUMAN Peptide chain release factor 1, m	4	1	1	1	0	0	1	0	0	0	0	0	1	0	0	0	0	0	1	0	0	0	7.3	7.3	7.3	18.208	151	151;153;226;445	1	-2			By MS/MS				0	0	7.3	0	0	0
Q5JR59	Q5JR59	1	1	1	Microtubule-associated tumor suppressor candidate 2	MTUS2	sp|Q5JR59|MTUS2_HUMAN Microtubule-associated tumor suppressor candidate 2 OS=Homo sapiens OX=9606 GN=MTUS2 PE=1 SV=3	1	1	1	1	1	0	0	0	0	0	1	0	0	0	0	0	1	0	0	0	0	0	1.2	1.2	1.2	150.19	1369	1369	1	-2	By MS/MS						1.2	0	0	0	0	0
M0R2S7;Q8WXI7	M0R2S7;Q8WXI7	1;1	1;1	1;1	Mucin-16	MUC16	tr|M0R2S7|M0R2S7_HUMAN Mucin-16 (Fragment) OS=Homo sapiens OX=9606 GN=MUC16 PE=1 SV=1;sp|Q8WXI7|MUC16_HUMAN Mucin-16 OS=Homo sapiens OX=9606 GN=MUC16 PE=1 SV=3	2	1	1	1	0	0	1	1	0	0	0	0	1	1	0	0	0	0	1	1	0	0	1.1	1.1	1.1	148.17	1330	1330;14507	1	-2			By matching	By MS/MS			0	0	1.1	1.1	0	0
Q96EY5;E9PLZ8;E9PQA6;M0QZK6;E9PLL0;E9PJW8	Q96EY5;E9PLZ8;E9PQA6	5;4;3;2;1;1	5;4;3;2;1;1	5;4;3;2;1;1	Multivesicular body subunit 12A	MVB12A	sp|Q96EY5|MB12A_HUMAN Multivesicular body subunit 12A OS=Homo sapiens OX=9606 GN=MVB12A PE=1 SV=1;tr|E9PLZ8|E9PLZ8_HUMAN ESCRT-I complex subunit MVB12A (Fragment) OS=Homo sapiens OX=9606 GN=MVB12A PE=1 SV=8;tr|E9PQA6|E9PQA6_HUMAN Multivesicular body subuni	6	5	5	5	0	0	5	0	0	3	0	0	5	0	0	3	0	0	5	0	0	3	36.3	36.3	36.3	28.783	273	273;133;273;122;121;199	0	55.008			By MS/MS			By MS/MS	0	0	36.3	0	0	18.7
Q9H7P6;F8W922	Q9H7P6	6;1	6;1	6;1	Multivesicular body subunit 12B	MVB12B	sp|Q9H7P6|MB12B_HUMAN Multivesicular body subunit 12B OS=Homo sapiens OX=9606 GN=MVB12B PE=1 SV=2	2	6	6	6	0	0	2	1	1	4	0	0	2	1	1	4	0	0	2	1	1	4	30.7	30.7	30.7	35.619	319	319;205	0	20.267			By MS/MS	By MS/MS	By MS/MS	By MS/MS	0	0	7.8	4.1	4.1	21.6
Q9Y2K3	Q9Y2K3	1	1	1	Myosin-15	MYH15	sp|Q9Y2K3|MYH15_HUMAN Myosin-15 OS=Homo sapiens OX=9606 GN=MYH15 PE=1 SV=5	1	1	1	1	0	0	0	0	0	0	0	0	0	0	0	0	0	0	0	0	0	0	0.8	0.8	0.8	224.62	1946	1946	1	-2							0	0	0	0	0	0
P05976;P08590	P05976;P08590	1;1	1;1	1;1	Myosin light chain 1/3, skeletal muscle isoform;Myosin light chain 3	MYL1;MYL3	sp|P05976|MYL1_HUMAN Myosin light chain 1/3, skeletal muscle isoform OS=Homo sapiens OX=9606 GN=MYL1 PE=1 SV=3;sp|P08590|MYL3_HUMAN Myosin light chain 3 OS=Homo sapiens OX=9606 GN=MYL3 PE=1 SV=3	2	1	1	1	0	0	0	0	0	1	0	0	0	0	0	1	0	0	0	0	0	1	8.2	8.2	8.2	21.145	194	194;195	0.00047237	2.1326						By MS/MS	0	0	0	0	0	8.2
Q15746	Q15746	1	1	1	Myosin light chain kinase, smooth muscle;Myosin light chain kinase, smooth muscle, deglutamylated form	MYLK	sp|Q15746|MYLK_HUMAN Myosin light chain kinase, smooth muscle OS=Homo sapiens OX=9606 GN=MYLK PE=1 SV=4	1	1	1	1	0	0	1	0	0	1	0	0	1	0	0	1	0	0	1	0	0	1	0.4	0.4	0.4	210.71	1914	1914	0.0056112	1.1657			By MS/MS			By MS/MS	0	0	0.4	0	0	0.4
A0A590UKB0;A0A590UJ75;A0A0D9SGC1;A0A0A0MRM8;A0A1Y0BRN3;A0A590UJ40;E7EW20;Q9UM54;A0A590UJW9;A0A590UK71;A0A5F9ZI03;A0A590UJY4;A0A590UK86;A0A590UK22	A0A590UKB0;A0A590UJ75;A0A0D9SGC1;A0A0A0MRM8;A0A1Y0BRN3;A0A590UJ40;E7EW20;Q9UM54;A0A590UJW9;A0A590UK71;A0A5F9ZI03;A0A590UJY4;A0A590UK86;A0A590UK22	2;2;2;2;2;2;2;2;1;1;1;1;1;1	2;2;2;2;2;2;2;2;1;1;1;1;1;1	2;2;2;2;2;2;2;2;1;1;1;1;1;1	Unconventional myosin-VI	MYO6	tr|A0A590UKB0|A0A590UKB0_HUMAN Unconventional myosin-VI (Fragment) OS=Homo sapiens OX=9606 GN=MYO6 PE=1 SV=1;tr|A0A590UJ75|A0A590UJ75_HUMAN Unconventional myosin-VI (Fragment) OS=Homo sapiens OX=9606 GN=MYO6 PE=1 SV=1;tr|A0A0D9SGC1|A0A0D9SGC1_HUMAN Unconve	14	2	2	2	0	0	0	0	0	1	0	0	0	0	0	1	0	0	0	0	0	1	3.6	3.6	3.6	105.76	924	924;926;962;1253;1285;1294;1295;1294;194;634;661;664;690;878	0.0078094	1.0653						By matching	0	0	0	0	0	1.3
M0R300;M0R0P8;Q13459	M0R300;M0R0P8;Q13459	1;1;1	1;1;1	1;1;1	Unconventional myosin-IXb	MYO9B	tr|M0R300|M0R300_HUMAN Unconventional myosin-IXb (Fragment) OS=Homo sapiens OX=9606 GN=MYO9B PE=1 SV=8;tr|M0R0P8|M0R0P8_HUMAN Unconventional myosin-IXb OS=Homo sapiens OX=9606 GN=MYO9B PE=1 SV=1;sp|Q13459|MYO9B_HUMAN Unconventional myosin-IXb OS=Homo sapie	3	1	1	1	0	0	0	0	0	1	0	0	0	0	0	1	0	0	0	0	0	1	0.4	0.4	0.4	234.07	2071	2071;2157;2157	1	-2						By MS/MS	0	0	0	0	0	0.4
A0A494C0V9;B8ZZ87;Q6NZ67;H7BZ50;H7C173;Q6P582;H7C202	A0A494C0V9;B8ZZ87;Q6NZ67;H7BZ50;H7C173;Q6P582	3;3;3;2;2;2;1	3;3;3;2;2;2;1	3;3;3;2;2;2;1	Mitotic-spindle organizing protein 2B;Mitotic-spindle organizing protein 2A	MZT2B;MZT2A	tr|A0A494C0V9|A0A494C0V9_HUMAN Mitotic-spindle organizing protein 2B OS=Homo sapiens OX=9606 GN=MZT2B PE=1 SV=1;tr|B8ZZ87|B8ZZ87_HUMAN Mitotic-spindle organizing protein 2B OS=Homo sapiens OX=9606 GN=MZT2B PE=1 SV=1;sp|Q6NZ67|MZT2B_HUMAN Mitotic-spindle or	7	3	3	3	0	0	3	0	0	2	0	0	3	0	0	2	0	0	3	0	0	2	37.8	37.8	37.8	15.95	156	156;218;158;121;122;158;140	0	121.81			By MS/MS			By MS/MS	0	0	37.8	0	0	24.4
P41227;C9JN83;C9JW55;F8W808;A8MWP7	P41227	3;1;1;1;1	3;1;1;1;1	3;1;1;1;1	N-alpha-acetyltransferase 10	NAA10	sp|P41227|NAA10_HUMAN N-alpha-acetyltransferase 10 OS=Homo sapiens OX=9606 GN=NAA10 PE=1 SV=1	5	3	3	3	0	1	0	1	1	2	0	1	0	1	1	2	0	1	0	1	1	2	19.1	19.1	19.1	26.458	235	235;142;145;169;184	0	22.662		By MS/MS		By MS/MS	By matching	By MS/MS	0	4.7	0	4.7	4.7	14.5
A0A0B4J1W3;Q9BXJ9	A0A0B4J1W3;Q9BXJ9	3;3	3;3	3;3	N-alpha-acetyltransferase 15, NatA auxiliary subunit	NAA15	tr|A0A0B4J1W3|A0A0B4J1W3_HUMAN N-alpha-acetyltransferase 15, NatA auxiliary subunit OS=Homo sapiens OX=9606 GN=NAA15 PE=1 SV=1;sp|Q9BXJ9|NAA15_HUMAN N-alpha-acetyltransferase 15, NatA auxiliary subunit OS=Homo sapiens OX=9606 GN=NAA15 PE=1 SV=1	2	3	3	3	0	0	1	0	0	2	0	0	1	0	0	2	0	0	1	0	0	2	4.6	4.6	4.6	101.2	865	865;866	0	5.2028			By MS/MS			By MS/MS	0	0	1.3	0	0	2.8
Q86UY6	Q86UY6	1	1	1	N-alpha-acetyltransferase 40	NAA40	sp|Q86UY6|NAA40_HUMAN N-alpha-acetyltransferase 40 OS=Homo sapiens OX=9606 GN=NAA40 PE=1 SV=1	1	1	1	1	0	0	1	0	0	1	0	0	1	0	0	1	0	0	1	0	0	1	7.2	7.2	7.2	27.194	237	237	0.0013228	1.6314			By matching			By MS/MS	0	0	7.2	0	0	7.2
F8WCK0;C9JZU6;C9J5J3;A0A0D9SF32;A0A087WWJ2;C9J5D1;E7EQ69;Q9GZZ1	F8WCK0;C9JZU6;C9J5J3;A0A0D9SF32;A0A087WWJ2;C9J5D1;E7EQ69;Q9GZZ1	1;1;1;1;1;1;1;1	1;1;1;1;1;1;1;1	1;1;1;1;1;1;1;1	N-alpha-acetyltransferase 50	NAA50	tr|F8WCK0|F8WCK0_HUMAN N-alpha-acetyltransferase 50 OS=Homo sapiens OX=9606 GN=NAA50 PE=1 SV=1;tr|C9JZU6|C9JZU6_HUMAN N-alpha-acetyltransferase 50 (Fragment) OS=Homo sapiens OX=9606 GN=NAA50 PE=1 SV=1;tr|C9J5J3|C9J5J3_HUMAN N-alpha-acetyltransferase 50 OS=	8	1	1	1	0	1	1	0	0	0	0	1	1	0	0	0	0	1	1	0	0	0	25	25	25	5.6026	48	48;57;58;58;81;129;168;169	0.0041459	1.2957		By MS/MS	By MS/MS				0	25	25	0	0	0
F8VZJ2;F8VNW4;F8W0W4;A0A7I2V2K5;H0YHX9;A0A7I2V473;Q13765;E9PAV3;F8VZ58;Q9BZK3	F8VZJ2;F8VNW4;F8W0W4;A0A7I2V2K5;H0YHX9;A0A7I2V473;Q13765;E9PAV3;F8VZ58;Q9BZK3	2;2;2;2;2;2;2;2;1;1	2;2;2;2;2;2;2;2;1;1	2;2;2;2;2;2;2;2;1;1	Nascent polypeptide-associated complex subunit alpha;Nascent polypeptide-associated complex subunit alpha, muscle-specific form;Putative nascent polypeptide-associated complex subunit alpha-like protein	NACA;NACAP1	tr|F8VZJ2|F8VZJ2_HUMAN Nascent polypeptide-associated complex subunit alpha OS=Homo sapiens OX=9606 GN=NACA PE=1 SV=1;tr|F8VNW4|F8VNW4_HUMAN Nascent polypeptide-associated complex subunit alpha (Fragment) OS=Homo sapiens OX=9606 GN=NACA PE=1 SV=1;tr|F8W0W4	10	2	2	2	0	0	1	0	0	0	0	0	1	0	0	0	0	0	1	0	0	0	30.9	30.9	30.9	15.016	136	136;148;198;211;235;295;215;2078;126;213	0	87.172			By MS/MS				0	0	9.6	0	0	0
O95544;J3KTI3;A0A0A0MR98	O95544;J3KTI3;A0A0A0MR98	2;1;1	2;1;1	2;1;1	NAD kinase	NADK	sp|O95544|NADK_HUMAN NAD kinase OS=Homo sapiens OX=9606 GN=NADK PE=1 SV=1;tr|J3KTI3|J3KTI3_HUMAN NAD(+) kinase (Fragment) OS=Homo sapiens OX=9606 GN=NADK PE=1 SV=1;tr|A0A0A0MR98|A0A0A0MR98_HUMAN NAD(+) kinase OS=Homo sapiens OX=9606 GN=NADK PE=1 SV=1	3	2	2	2	0	1	2	0	0	2	0	1	2	0	0	2	0	1	2	0	0	2	7	7	7	49.228	446	446;74;414	0	3.369		By MS/MS	By MS/MS			By MS/MS	0	3.1	7	0	0	7
Q13564;J3KTE3	Q13564	3;1	3;1	3;1	NEDD8-activating enzyme E1 regulatory subunit	NAE1	sp|Q13564|ULA1_HUMAN NEDD8-activating enzyme E1 regulatory subunit OS=Homo sapiens OX=9606 GN=NAE1 PE=1 SV=1	2	3	3	3	0	0	2	0	0	1	0	0	2	0	0	1	0	0	2	0	0	1	7.1	7.1	7.1	60.246	534	534;129	0	2.3932			By MS/MS			By MS/MS	0	0	3.7	0	0	1.9
B7Z8W6;A0A7P0Z466;A0A7P0TA73;A0A7P0T941;A0A7P0TBB7;A0A0C4DFS8;A0A7P0T8D2;A0A7P0T862;A0A7P0T931;A0A7P0TAS5;A0A7P0T973;A0A7P0T8L3;A0A7P0T9I9;A0A7P0T895;P43490	B7Z8W6;A0A7P0Z466;A0A7P0TA73;A0A7P0T941;A0A7P0TBB7;A0A0C4DFS8;A0A7P0T8D2;A0A7P0T862;A0A7P0T931;A0A7P0TAS5;A0A7P0T973;A0A7P0T8L3;A0A7P0T9I9;A0A7P0T895;P43490	1;1;1;1;1;1;1;1;1;1;1;1;1;1;1	1;1;1;1;1;1;1;1;1;1;1;1;1;1;1	1;1;1;1;1;1;1;1;1;1;1;1;1;1;1	Nicotinamide phosphoribosyltransferase	NAMPT	tr|B7Z8W6|B7Z8W6_HUMAN Nicotinamide phosphoribosyltransferase OS=Homo sapiens OX=9606 GN=NAMPT PE=2 SV=1;tr|A0A7P0Z466|A0A7P0Z466_HUMAN Nicotinamide phosphoribosyltransferase OS=Homo sapiens OX=9606 GN=NAMPT PE=4 SV=1;tr|A0A7P0TA73|A0A7P0TA73_HUMAN Nicotin	15	1	1	1	0	0	0	0	0	0	0	0	0	0	0	0	0	0	0	0	0	0	6.2	6.2	6.2	26.807	241	241;252;253;253;283;368;375;404;425;426;444;464;488;490;491	0.006746	1.1209							0	0	0	0	0	0
A0A1W2PR93;Q7Z5D8	A0A1W2PR93;Q7Z5D8	1;1	1;1	1;1	NANOG neighbor homeobox	NANOGNB	tr|A0A1W2PR93|A0A1W2PR93_HUMAN NANOG neighbor homeobox OS=Homo sapiens OX=9606 GN=NANOGNB PE=4 SV=1;sp|Q7Z5D8|NANGN_HUMAN NANOG neighbor homeobox OS=Homo sapiens OX=9606 GN=NANOGNB PE=2 SV=1	2	1	1	1	0	0	0	0	0	1	0	0	0	0	0	1	0	0	0	0	0	1	5.9	5.9	5.9	20.726	169	169;188	0.0091778	0.97649						By MS/MS	0	0	0	0	0	5.9
M0R0Y2;P54920;M0R2M1;M0R213;M0R027;M0R058;M0R0I4	M0R0Y2;P54920;M0R2M1;M0R213	4;4;3;2;1;1;1	4;4;3;2;1;1;1	4;4;3;2;1;1;1	Alpha-soluble NSF attachment protein	NAPA	tr|M0R0Y2|M0R0Y2_HUMAN Alpha-soluble NSF attachment protein OS=Homo sapiens OX=9606 GN=NAPA PE=1 SV=1;sp|P54920|SNAA_HUMAN Alpha-soluble NSF attachment protein OS=Homo sapiens OX=9606 GN=NAPA PE=1 SV=3;tr|M0R2M1|M0R2M1_HUMAN Alpha-soluble NSF attachment pr	7	4	4	4	0	0	2	0	0	2	0	0	2	0	0	2	0	0	2	0	0	2	19.5	19.5	19.5	29.163	256	256;295;268;83;102;137;139	0	3.1248			By MS/MS			By MS/MS	0	0	11.7	0	0	10.5
Q09161;X6R941	Q09161	5;1	5;1	5;1	Nuclear cap-binding protein subunit 1	NCBP1	sp|Q09161|NCBP1_HUMAN Nuclear cap-binding protein subunit 1 OS=Homo sapiens OX=9606 GN=NCBP1 PE=1 SV=1	2	5	5	5	0	0	2	0	0	2	0	0	2	0	0	2	0	0	2	0	0	2	8.4	8.4	8.4	91.838	790	790;155	0	10.479			By MS/MS			By MS/MS	0	0	4.2	0	0	4.2
Q9Y2A7;F8W050;P55160	Q9Y2A7	7;1;1	7;1;1	7;1;1	Nck-associated protein 1	NCKAP1	sp|Q9Y2A7|NCKP1_HUMAN Nck-associated protein 1 OS=Homo sapiens OX=9606 GN=NCKAP1 PE=1 SV=1	3	7	7	7	0	0	4	0	0	3	0	0	4	0	0	3	0	0	4	0	0	3	8.4	8.4	8.4	128.79	1128	1128;449;1127	0	30.211			By MS/MS			By MS/MS	0	0	5	0	0	3.5
Q9NZQ3;F8WCR8;C9JSC3	Q9NZQ3;F8WCR8;C9JSC3	2;1;1	2;1;1	2;1;1	NCK-interacting protein with SH3 domain	NCKIPSD	sp|Q9NZQ3|SPN90_HUMAN NCK-interacting protein with SH3 domain OS=Homo sapiens OX=9606 GN=NCKIPSD PE=1 SV=1;tr|F8WCR8|F8WCR8_HUMAN NCK-interacting protein with SH3 domain OS=Homo sapiens OX=9606 GN=NCKIPSD PE=1 SV=1;tr|C9JSC3|C9JSC3_HUMAN NCK-interacting pr	3	2	2	2	0	0	0	0	0	1	0	0	0	0	0	1	0	0	0	0	0	1	4.3	4.3	4.3	78.959	722	722;58;395	0.00046168	1.95						By MS/MS	0	0	0	0	0	2.8
E7EVK1;O75376	E7EVK1;O75376	1;1	1;1	1;1	Nuclear receptor corepressor 1	NCOR1	tr|E7EVK1|E7EVK1_HUMAN Nuclear receptor corepressor 1 (Fragment) OS=Homo sapiens OX=9606 GN=NCOR1 PE=1 SV=2;sp|O75376|NCOR1_HUMAN Nuclear receptor corepressor 1 OS=Homo sapiens OX=9606 GN=NCOR1 PE=1 SV=2	2	1	1	1	0	1	0	1	1	0	0	1	0	1	1	0	0	1	0	1	1	0	1.2	1.2	1.2	116.26	1071	1071;2440	0.00047081	2.1164		By MS/MS		By MS/MS	By MS/MS		0	1.2	0	1.2	1.2	0
O14777	O14777	1	1	1	Kinetochore protein NDC80 homolog	NDC80	sp|O14777|NDC80_HUMAN Kinetochore protein NDC80 homolog OS=Homo sapiens OX=9606 GN=NDC80 PE=1 SV=1	1	1	1	1	0	0	0	0	0	1	0	0	0	0	0	1	0	0	0	0	0	1	2.8	2.8	2.8	73.912	642	642	0	3.5094						By matching	0	0	0	0	0	2.8
A6NIZ0;Q9GZM8;J3QL85;J3QSD2;J3QRZ1;J3KRK9	A6NIZ0;Q9GZM8;J3QL85;J3QSD2;J3QRZ1	6;6;3;3;3;2	3;3;2;1;1;1	3;3;2;1;1;1	Nuclear distribution protein nudE-like 1	NDEL1	tr|A6NIZ0|A6NIZ0_HUMAN Nuclear distribution protein nudE-like 1 OS=Homo sapiens OX=9606 GN=NDEL1 PE=1 SV=4;sp|Q9GZM8|NDEL1_HUMAN Nuclear distribution protein nudE-like 1 OS=Homo sapiens OX=9606 GN=NDEL1 PE=1 SV=1;tr|J3QL85|J3QL85_HUMAN Nuclear distribution	6	6	3	3	1	1	2	2	4	5	0	0	2	1	2	2	0	0	2	1	2	2	21.9	13	13	30.638	269	269;345;158;194;196;145	0	17.086	By matching	By matching	By MS/MS	By matching	By MS/MS	By MS/MS	4.1	4.1	10.4	10	17.8	19.3
D6RF18;D6R972;Q8TB73	D6RF18;D6R972;Q8TB73	3;3;3	3;3;3	3;3;3	Protein NDNF	NDNF	tr|D6RF18|D6RF18_HUMAN Protein NDNF (Fragment) OS=Homo sapiens OX=9606 GN=NDNF PE=1 SV=1;tr|D6R972|D6R972_HUMAN Protein NDNF (Fragment) OS=Homo sapiens OX=9606 GN=NDNF PE=1 SV=1;sp|Q8TB73|NDNF_HUMAN Protein NDNF OS=Homo sapiens OX=9606 GN=NDNF PE=1 SV=2	3	3	3	3	2	0	0	0	2	0	2	0	0	0	2	0	2	0	0	0	2	0	22.4	22.4	22.4	13.5	116	116;145;568	0	4.3624	By MS/MS				By MS/MS		22.4	0	0	0	21.6	0
Q5TH30;Q9UGV2;Q5TH29;F8WBF9	Q5TH30;Q9UGV2;Q5TH29;F8WBF9	2;2;1;1	2;2;1;1	2;2;1;1	Protein NDRG3	NDRG3	tr|Q5TH30|Q5TH30_HUMAN N-myc downstream-regulated gene 3 protein OS=Homo sapiens OX=9606 GN=NDRG3 PE=1 SV=1;sp|Q9UGV2|NDRG3_HUMAN Protein NDRG3 OS=Homo sapiens OX=9606 GN=NDRG3 PE=1 SV=2;tr|Q5TH29|Q5TH29_HUMAN N-myc downstream-regulated gene 3 protein (Fra	4	2	2	2	0	0	0	0	0	2	0	0	0	0	0	2	0	0	0	0	0	2	8.8	8.8	8.8	42.85	388	388;375;187;280	0	3.2972						By MS/MS	0	0	0	0	0	8.8
O95299;E7ESZ7;A0A087WXC5;A0A7I2YQU0;A0A7I2V594;A0A7I2V419;A0A7I2V4N8;A0A7I2V2N6;H7C2X4;H7C1Y7;A0A7I2V5B2;A0A7I2V5U7;A0A7I2V2X3;A0A7I2V458;A0A7I2V2W9;A0A7I2V438;A0A7I2V3H5;A0A7I2V5L0;A0A7I2V327;A0A7I2V2I6;C9J6X0;A0A7I2V2F6;A0A7I2V3D4;Q8N1B9	O95299;E7ESZ7;A0A087WXC5;A0A7I2YQU0;A0A7I2V594;A0A7I2V419;A0A7I2V4N8;A0A7I2V2N6;H7C2X4;H7C1Y7;A0A7I2V5B2;A0A7I2V5U7;A0A7I2V2X3;A0A7I2V458;A0A7I2V2W9;A0A7I2V438;A0A7I2V3H5;A0A7I2V5L0;A0A7I2V327	3;3;3;3;3;2;2;2;2;2;2;2;2;2;2;2;2;2;2;1;1;1;1;1	3;3;3;3;3;2;2;2;2;2;2;2;2;2;2;2;2;2;2;1;1;1;1;1	3;3;3;3;3;2;2;2;2;2;2;2;2;2;2;2;2;2;2;1;1;1;1;1	NADH dehydrogenase [ubiquinone] 1 alpha subcomplex subunit 10, mitochondrial	NDUFA10	sp|O95299|NDUAA_HUMAN NADH dehydrogenase [ubiquinone] 1 alpha subcomplex subunit 10, mitochondrial OS=Homo sapiens OX=9606 GN=NDUFA10 PE=1 SV=1;tr|E7ESZ7|E7ESZ7_HUMAN NADH dehydrogenase [ubiquinone] 1 alpha subcomplex subunit 10, mitochondrial OS=Homo sapi	24	3	3	3	0	1	2	0	1	2	0	1	2	0	1	2	0	1	2	0	1	2	15.2	15.2	15.2	40.75	355	355;390;371;321;354;345;388;384;375;362;361;358;344;339;335;317;297;297;393;202;244;236;203;201	0	14.165		By matching	By MS/MS		By matching	By MS/MS	0	4.8	9	0	4.8	9
O43678	O43678	2	2	2	NADH dehydrogenase [ubiquinone] 1 alpha subcomplex subunit 2	NDUFA2	sp|O43678|NDUA2_HUMAN NADH dehydrogenase [ubiquinone] 1 alpha subcomplex subunit 2 OS=Homo sapiens OX=9606 GN=NDUFA2 PE=1 SV=3	1	2	2	2	1	1	2	1	1	2	1	1	2	1	1	2	1	1	2	1	1	2	31.3	31.3	31.3	10.921	99	99	0	32.511	By MS/MS	By matching	By MS/MS	By MS/MS	By MS/MS	By MS/MS	10.1	10.1	31.3	10.1	21.2	31.3
O00483	O00483	1	1	1	Cytochrome c oxidase subunit NDUFA4	NDUFA4	sp|O00483|NDUA4_HUMAN Cytochrome c oxidase subunit NDUFA4 OS=Homo sapiens OX=9606 GN=NDUFA4 PE=1 SV=1	1	1	1	1	0	0	0	0	0	0	0	0	0	0	0	0	0	0	0	0	0	0	12.3	12.3	12.3	9.3697	81	81	0.0045063	1.2339							0	0	0	0	0	0
P51970	P51970	6	6	6	NADH dehydrogenase [ubiquinone] 1 alpha subcomplex subunit 8	NDUFA8	sp|P51970|NDUA8_HUMAN NADH dehydrogenase [ubiquinone] 1 alpha subcomplex subunit 8 OS=Homo sapiens OX=9606 GN=NDUFA8 PE=1 SV=3	1	6	6	6	0	0	3	0	0	5	0	0	3	0	0	5	0	0	3	0	0	5	43.6	43.6	43.6	20.105	172	172	0	37.328			By MS/MS			By MS/MS	0	0	26.7	0	0	43.6
H0YNB7;H0YL22;A0A7I2V4I7;H0YNN4;Q9Y375	H0YNB7;H0YL22;A0A7I2V4I7;H0YNN4;Q9Y375	1;1;1;1;1	1;1;1;1;1	1;1;1;1;1	Complex I intermediate-associated protein 30, mitochondrial	NDUFAF1	tr|H0YNB7|H0YNB7_HUMAN Complex I intermediate-associated protein 30, mitochondrial (Fragment) OS=Homo sapiens OX=9606 GN=NDUFAF1 PE=1 SV=1;tr|H0YL22|H0YL22_HUMAN Complex I intermediate-associated protein 30, mitochondrial OS=Homo sapiens OX=9606 GN=NDUFAF1	5	1	1	1	0	0	0	0	0	1	0	0	0	0	0	1	0	0	0	0	0	1	5.3	5.3	5.3	23.782	209	209;261;292;351;327	0.0084648	1.001						By MS/MS	0	0	0	0	0	5.3
Q9BU61	Q9BU61	2	2	2	NADH dehydrogenase [ubiquinone] 1 alpha subcomplex assembly factor 3	NDUFAF3	sp|Q9BU61|NDUF3_HUMAN NADH dehydrogenase [ubiquinone] 1 alpha subcomplex assembly factor 3 OS=Homo sapiens OX=9606 GN=NDUFAF3 PE=1 SV=1	1	2	2	2	0	0	1	0	0	0	0	0	1	0	0	0	0	0	1	0	0	0	18.5	18.5	18.5	20.35	184	184	0.0067008	1.0895			By MS/MS				0	0	12.5	0	0	0
O95168;C9JXQ9;F2Z3P9	O95168;C9JXQ9;F2Z3P9	4;3;2	4;3;2	4;3;2	NADH dehydrogenase [ubiquinone] 1 beta subcomplex subunit 4	NDUFB4	sp|O95168|NDUB4_HUMAN NADH dehydrogenase [ubiquinone] 1 beta subcomplex subunit 4 OS=Homo sapiens OX=9606 GN=NDUFB4 PE=1 SV=3;tr|C9JXQ9|C9JXQ9_HUMAN Complex I-B15 OS=Homo sapiens OX=9606 GN=NDUFB4 PE=1 SV=1;tr|F2Z3P9|F2Z3P9_HUMAN Complex I-B15 OS=Homo sapi	3	4	4	4	0	0	3	1	0	2	0	0	3	1	0	2	0	0	3	1	0	2	38	38	38	15.208	129	129;80;69	0	18.032			By MS/MS	By MS/MS		By MS/MS	0	0	31	14	0	17.1
B4DJ81;P28331	B4DJ81;P28331	6;6	6;6	6;6	NADH-ubiquinone oxidoreductase 75 kDa subunit, mitochondrial	NDUFS1	tr|B4DJ81|B4DJ81_HUMAN NADH-ubiquinone oxidoreductase 75 kDa subunit, mitochondrial OS=Homo sapiens OX=9606 GN=NDUFS1 PE=1 SV=1;sp|P28331|NDUS1_HUMAN NADH-ubiquinone oxidoreductase 75 kDa subunit, mitochondrial OS=Homo sapiens OX=9606 GN=NDUFS1 PE=1 SV=3	2	6	6	6	0	0	5	0	0	3	0	0	5	0	0	3	0	0	5	0	0	3	16.5	16.5	16.5	66.921	611	611;727	0	13.029			By MS/MS			By MS/MS	0	0	15.2	0	0	7.5
A0A7I2V4W5;A0A7I2V2B9;A0A7I2V596;A0A7I2YQG7;A0A7I2V5D5;A0A7I2V517;A0A7I2V5E2;A0A7I2V5G4;A0A7I2V630;A0A7I2V410;A0A7I2V3J6;A0A7I2YQD8;A0A7I2V4G5;A0A7I2V4X8;O75306	A0A7I2V4W5;A0A7I2V2B9;A0A7I2V596;A0A7I2YQG7;A0A7I2V5D5;A0A7I2V517;A0A7I2V5E2;A0A7I2V5G4;A0A7I2V630;A0A7I2V410;A0A7I2V3J6;A0A7I2YQD8;A0A7I2V4G5;A0A7I2V4X8;O75306	2;2;2;2;1;1;1;1;1;1;1;1;1;1;1	2;2;2;2;1;1;1;1;1;1;1;1;1;1;1	2;2;2;2;1;1;1;1;1;1;1;1;1;1;1	NADH dehydrogenase [ubiquinone] iron-sulfur protein 2, mitochondrial	NDUFS2	tr|A0A7I2V4W5|A0A7I2V4W5_HUMAN Complex I-49kD OS=Homo sapiens OX=9606 GN=NDUFS2 PE=1 SV=1;tr|A0A7I2V2B9|A0A7I2V2B9_HUMAN Complex I-49kD OS=Homo sapiens OX=9606 GN=NDUFS2 PE=1 SV=1;tr|A0A7I2V596|A0A7I2V596_HUMAN Complex I-49kD OS=Homo sapiens OX=9606 GN=NDU	15	2	2	2	0	1	0	1	0	0	0	1	0	1	0	0	0	1	0	1	0	0	7.6	7.6	7.6	46.437	407	407;407;478;484;212;253;334;341;372;386;423;431;437;438;463	0	2.785		By matching		By MS/MS			0	4.4	0	4.4	0	0
O75380;D6RBT3	O75380;D6RBT3	4;2	4;2	4;2	NADH dehydrogenase [ubiquinone] iron-sulfur protein 6, mitochondrial	NDUFS6	sp|O75380|NDUS6_HUMAN NADH dehydrogenase [ubiquinone] iron-sulfur protein 6, mitochondrial OS=Homo sapiens OX=9606 GN=NDUFS6 PE=1 SV=1;tr|D6RBT3|D6RBT3_HUMAN NADH dehydrogenase [ubiquinone] iron-sulfur protein 6, mitochondrial OS=Homo sapiens OX=9606 GN=ND	2	4	4	4	1	0	2	1	1	3	1	0	2	1	1	3	1	0	2	1	1	3	49.2	49.2	49.2	13.711	124	124;172	0	22.898	By MS/MS		By MS/MS	By MS/MS	By MS/MS	By MS/MS	19.4	0	29	19.4	19.4	37.1
E9PKH6;E9PPW7;O00217;E9PN51;F8W9K7	E9PKH6;E9PPW7;O00217;E9PN51;F8W9K7	2;2;2;1;1	2;2;2;1;1	2;2;2;1;1	NADH dehydrogenase [ubiquinone] iron-sulfur protein 8, mitochondrial	NDUFS8	tr|E9PKH6|E9PKH6_HUMAN Complex I-23kD (Fragment) OS=Homo sapiens OX=9606 GN=NDUFS8 PE=1 SV=1;tr|E9PPW7|E9PPW7_HUMAN Complex I-23kD (Fragment) OS=Homo sapiens OX=9606 GN=NDUFS8 PE=1 SV=1;sp|O00217|NDUS8_HUMAN NADH dehydrogenase [ubiquinone] iron-sulfur prot	5	2	2	2	0	0	2	0	0	2	0	0	2	0	0	2	0	0	2	0	0	2	19.6	19.6	19.6	15.892	138	138;184;210;110;124	0	13.493			By MS/MS			By MS/MS	0	0	19.6	0	0	19.6
E7EPT4;P19404	E7EPT4;P19404	3;3	3;3	3;3	NADH dehydrogenase [ubiquinone] flavoprotein 2, mitochondrial	NDUFV2	tr|E7EPT4|E7EPT4_HUMAN NADH dehydrogenase [ubiquinone] flavoprotein 2, mitochondrial OS=Homo sapiens OX=9606 GN=NDUFV2 PE=1 SV=1;sp|P19404|NDUV2_HUMAN NADH dehydrogenase [ubiquinone] flavoprotein 2, mitochondrial OS=Homo sapiens OX=9606 GN=NDUFV2 PE=1 SV=2	2	3	3	3	0	0	3	1	0	2	0	0	3	1	0	2	0	0	3	1	0	2	17.9	17.9	17.9	27.907	252	252;249	0	2.4978			By MS/MS	By MS/MS		By MS/MS	0	0	17.9	7.9	0	9.9
A0A0U1RQY0;O76041	A0A0U1RQY0;O76041	1;1	1;1	1;1	Nebulette	NEBL	tr|A0A0U1RQY0|A0A0U1RQY0_HUMAN Nebulette (Fragment) OS=Homo sapiens OX=9606 GN=NEBL PE=1 SV=1;sp|O76041|NEBL_HUMAN Nebulette OS=Homo sapiens OX=9606 GN=NEBL PE=1 SV=1	2	1	1	1	0	0	0	0	0	0	0	0	0	0	0	0	0	0	0	0	0	0	21.7	21.7	21.7	13.237	115	115;1014	0.0045286	1.26							0	0	0	0	0	0
Q9NVZ3;D6RAN6;F6SKB8;H0Y970;D6RB24	Q9NVZ3;D6RAN6;F6SKB8	5;4;4;2;2	5;4;4;2;2	5;4;4;2;2	Adaptin ear-binding coat-associated protein 2	NECAP2	sp|Q9NVZ3|NECP2_HUMAN Adaptin ear-binding coat-associated protein 2 OS=Homo sapiens OX=9606 GN=NECAP2 PE=1 SV=1;tr|D6RAN6|D6RAN6_HUMAN Adaptin ear-binding coat-associated protein 2 OS=Homo sapiens OX=9606 GN=NECAP2 PE=1 SV=1;tr|F6SKB8|F6SKB8_HUMAN Adaptin	5	5	5	5	0	0	4	0	0	3	0	0	4	0	0	3	0	0	4	0	0	3	30.8	30.8	30.8	28.338	263	263;101;194;63;202	0	96.765			By MS/MS			By MS/MS	0	0	30	0	0	22.4
P46934;H0Y8X6;A0A6Q8PG81;A0A7P0Z498;K7ERN1;A0A1B0GVY1	P46934;H0Y8X6	3;2;1;1;1;1	3;2;1;1;1;1	2;1;0;0;0;0	E3 ubiquitin-protein ligase NEDD4	NEDD4	sp|P46934|NEDD4_HUMAN E3 ubiquitin-protein ligase NEDD4 OS=Homo sapiens OX=9606 GN=NEDD4 PE=1 SV=4;tr|H0Y8X6|H0Y8X6_HUMAN HECT-type E3 ubiquitin transferase (Fragment) OS=Homo sapiens OX=9606 GN=NEDD4 PE=1 SV=1	6	3	3	2	0	0	1	0	0	3	0	0	1	0	0	3	0	0	0	0	0	2	3.4	3.4	2.5	149.11	1319	1319;910;394;618;639;1254	0	8.557			By MS/MS			By MS/MS	0	0	0.9	0	0	3.4
P07196	P07196	7	6	6	Neurofilament light polypeptide	NEFL	sp|P07196|NFL_HUMAN Neurofilament light polypeptide OS=Homo sapiens OX=9606 GN=NEFL PE=1 SV=3	1	7	6	6	3	2	2	3	6	2	2	2	1	2	5	1	2	2	1	2	5	1	14.2	14.2	14.2	61.516	543	543	0	9.2541	By MS/MS	By MS/MS	By MS/MS	By MS/MS	By MS/MS	By MS/MS	6.6	5	2.2	6.6	13.6	6.3
G3V459;G3V2Z5;G3V5V0;A0A7I2V5R1;Q8TD19	G3V459;G3V2Z5;G3V5V0;A0A7I2V5R1;Q8TD19	1;1;1;1;1	1;1;1;1;1	1;1;1;1;1	Serine/threonine-protein kinase Nek9	NEK9	tr|G3V459|G3V459_HUMAN Serine/threonine-protein kinase Nek9 OS=Homo sapiens OX=9606 GN=NEK9 PE=1 SV=1;tr|G3V2Z5|G3V2Z5_HUMAN Serine/threonine-protein kinase Nek9 OS=Homo sapiens OX=9606 GN=NEK9 PE=1 SV=2;tr|G3V5V0|G3V5V0_HUMAN Serine/threonine-protein kina	5	1	1	1	0	1	0	1	1	0	0	1	0	1	1	0	0	1	0	1	1	0	20.2	20.2	20.2	11.491	104	104;260;592;991;979	0.0009009	1.7989		By matching		By MS/MS	By MS/MS		0	20.2	0	20.2	20.2	0
Q8NCF5	Q8NCF5	1	1	1	NFATC2-interacting protein	NFATC2IP	sp|Q8NCF5|NF2IP_HUMAN NFATC2-interacting protein OS=Homo sapiens OX=9606 GN=NFATC2IP PE=1 SV=1	1	1	1	1	0	0	1	0	0	1	0	0	1	0	0	1	0	0	1	0	0	1	4.1	4.1	4.1	45.816	419	419	0.00047059	2.1041			By MS/MS			By matching	0	0	4.1	0	0	4.1
A0A590UJ82;A0A590UK73;B1AKN6;B1AKN7;B1AKN5;A0A590UK09;A0A286YEX4;B1AKN8;P08651;Q12857	A0A590UJ82;A0A590UK73;B1AKN6;B1AKN7;B1AKN5;A0A590UK09;A0A286YEX4;B1AKN8;P08651;Q12857	2;2;2;2;2;2;2;2;2;2	2;2;2;2;2;2;2;2;2;2	1;1;1;1;1;1;1;1;1;1	Nuclear factor 1;Nuclear factor 1 C-type;Nuclear factor 1 A-type	NFIA;NFIC	tr|A0A590UJ82|A0A590UJ82_HUMAN CCAAT-box-binding transcription factor OS=Homo sapiens OX=9606 GN=NFIA PE=1 SV=1;tr|A0A590UK73|A0A590UK73_HUMAN Nuclear factor 1 OS=Homo sapiens OX=9606 GN=NFIA PE=1 SV=1;tr|B1AKN6|B1AKN6_HUMAN Nuclear factor 1 OS=Homo sapien	10	2	2	1	0	0	0	0	0	2	0	0	0	0	0	2	0	0	0	0	0	1	11.6	11.6	6.1	23.216	198	198;326;380;466;487;508;530;532;508;509	0	2.5286						By MS/MS	0	0	0	0	0	11.6
H7BZ39;Q8N5V2	H7BZ39;Q8N5V2	1;1	1;1	1;1	Ephexin-1	NGEF	tr|H7BZ39|H7BZ39_HUMAN Ephexin-1 (Fragment) OS=Homo sapiens OX=9606 GN=NGEF PE=1 SV=2;sp|Q8N5V2|NGEF_HUMAN Ephexin-1 OS=Homo sapiens OX=9606 GN=NGEF PE=1 SV=2	2	1	1	1	1	0	0	1	1	0	1	0	0	1	1	0	1	0	0	1	1	0	6.7	6.7	6.7	17.452	150	150;710	0.0056247	1.1736	By MS/MS			By MS/MS	By MS/MS		6.7	0	0	6.7	6.7	0
Q8NBF2	Q8NBF2	1	1	1	NHL repeat-containing protein 2	NHLRC2	sp|Q8NBF2|NHLC2_HUMAN NHL repeat-containing protein 2 OS=Homo sapiens OX=9606 GN=NHLRC2 PE=1 SV=1	1	1	1	1	0	0	0	0	0	1	0	0	0	0	0	1	0	0	0	0	0	1	1.7	1.7	1.7	79.443	726	726	0.00045683	1.8913						By MS/MS	0	0	0	0	0	1.7
J3QSY4;D6RC52;D6RCB9;Q9NX24	J3QSY4;D6RC52;D6RCB9;Q9NX24	4;4;4;4	4;4;4;4	4;4;4;4	H/ACA ribonucleoprotein complex subunit 2	NHP2	tr|J3QSY4|J3QSY4_HUMAN Ribonucloprotein OS=Homo sapiens OX=9606 GN=NHP2 PE=1 SV=1;tr|D6RC52|D6RC52_HUMAN Ribonucloprotein (Fragment) OS=Homo sapiens OX=9606 GN=NHP2 PE=1 SV=1;tr|D6RCB9|D6RCB9_HUMAN Ribonucloprotein (Fragment) OS=Homo sapiens OX=9606 GN=NHP	4	4	4	4	1	0	2	0	1	2	1	0	2	0	1	2	1	0	2	0	1	2	45.6	45.6	45.6	10.071	90	90;132;135;153	0	140.39	By MS/MS		By MS/MS		By MS/MS	By MS/MS	23.3	0	22.2	0	23.3	22.2
B1AHD1;A0A3B3IUA2;P55769;A0A3B3IRU2	B1AHD1;A0A3B3IUA2;P55769;A0A3B3IRU2	4;4;4;3	4;4;4;3	4;4;4;3	NHP2-like protein 1;NHP2-like protein 1, N-terminally processed	NHP2L1	tr|B1AHD1|B1AHD1_HUMAN Ribonucloprotein OS=Homo sapiens OX=9606 GN=SNU13 PE=1 SV=1;tr|A0A3B3IUA2|A0A3B3IUA2_HUMAN Ribonucloprotein OS=Homo sapiens OX=9606 GN=SNU13 PE=1 SV=1;sp|P55769|NH2L1_HUMAN NHP2-like protein 1 OS=Homo sapiens OX=9606 GN=SNU13 PE=1 SV	4	4	4	4	1	0	2	0	0	1	1	0	2	0	0	1	1	0	2	0	0	1	34.8	34.8	34.8	14.627	132	132;272;128;73	0	6.3427	By matching		By MS/MS			By MS/MS	12.1	0	18.2	0	0	9.1
P14543	P14543	2	2	2	Nidogen-1	NID1	sp|P14543|NID1_HUMAN Nidogen-1 OS=Homo sapiens OX=9606 GN=NID1 PE=1 SV=3	1	2	2	2	0	0	0	0	2	0	0	0	0	0	2	0	0	0	0	0	2	0	1	1	1	136.38	1247	1247	0.0021711	1.531					By MS/MS		0	0	0	0	1	0
Q9BPW8	Q9BPW8	1	1	1	Protein NipSnap homolog 1	NIPSNAP1	sp|Q9BPW8|NIPS1_HUMAN Protein NipSnap homolog 1 OS=Homo sapiens OX=9606 GN=NIPSNAP1 PE=1 SV=1	1	1	1	1	0	0	0	0	0	0	0	0	0	0	0	0	0	0	0	0	0	0	4.9	4.9	4.9	33.31	284	284	0.00089206	1.7218							0	0	0	0	0	0
P15531	P15531	7	2	1	Nucleoside diphosphate kinase A	NME1	sp|P15531|NDKA_HUMAN Nucleoside diphosphate kinase A OS=Homo sapiens OX=9606 GN=NME1 PE=1 SV=1	1	7	2	1	2	3	5	2	4	5	0	1	0	0	1	0	0	0	0	0	0	0	54.6	20.4	9.2	17.149	152	152	0	24.07	By matching	By MS/MS	By matching	By matching	By MS/MS	By matching	13.8	17.1	42.1	13.8	28.3	42.1
P22392;O60361;F6XY72	P22392;O60361	10;5;4	1;0;1	1;0;1	Nucleoside diphosphate kinase B;Putative nucleoside diphosphate kinase	NME2;NME2P1	sp|P22392|NDKB_HUMAN Nucleoside diphosphate kinase B OS=Homo sapiens OX=9606 GN=NME2 PE=1 SV=1;sp|O60361|NDK8_HUMAN Putative nucleoside diphosphate kinase OS=Homo sapiens OX=9606 GN=NME2P1 PE=5 SV=1	3	10	1	1	4	3	6	3	5	6	1	1	0	1	1	0	1	1	0	1	1	0	76.3	11.2	11.2	17.298	152	152;137;82	0	2.5555	By MS/MS	By MS/MS	By matching	By MS/MS	By MS/MS	By matching	29.6	17.1	54.6	17.1	40.8	54.6
Q9Y5B8;E9PNU1;B4DXC8	Q9Y5B8;E9PNU1;B4DXC8	9;5;5	9;5;5	9;5;5	Nucleoside diphosphate kinase 7	NME7	sp|Q9Y5B8|NDK7_HUMAN Nucleoside diphosphate kinase 7 OS=Homo sapiens OX=9606 GN=NME7 PE=1 SV=1;tr|E9PNU1|E9PNU1_HUMAN Nucleoside diphosphate kinase 7 OS=Homo sapiens OX=9606 GN=NME7 PE=1 SV=1;tr|B4DXC8|B4DXC8_HUMAN Nucleoside diphosphate kinase 7 OS=Homo s	3	9	9	9	0	0	4	1	0	8	0	0	4	1	0	8	0	0	4	1	0	8	31.1	31.1	31.1	42.491	376	376;256;339	0	18.237			By MS/MS	By matching		By MS/MS	0	0	10.9	6.1	0	28.7
F8WEA2	F8WEA2	1	1	1		NME8	tr|F8WEA2|F8WEA2_HUMAN Thioredoxin domain-containing protein 3 OS=Homo sapiens OX=9606 GN=NME8 PE=4 SV=1	1	1	1	1	0	0	0	0	1	0	0	0	0	0	1	0	0	0	0	0	1	0	16.7	16.7	16.7	6.3886	54	54	1	-2					By MS/MS		0	0	0	0	16.7	0
I3L543;I3L0Y6;I3L3I6;Q9HBL8	I3L543;I3L0Y6;I3L3I6;Q9HBL8	2;2;2;2	2;2;2;2	2;2;2;2	NmrA-like family domain-containing protein 1	NMRAL1	tr|I3L543|I3L543_HUMAN NmrA-like family domain-containing protein 1 (Fragment) OS=Homo sapiens OX=9606 GN=NMRAL1 PE=1 SV=1;tr|I3L0Y6|I3L0Y6_HUMAN NmrA-like family domain-containing protein 1 (Fragment) OS=Homo sapiens OX=9606 GN=NMRAL1 PE=1 SV=1;tr|I3L3I6|	4	2	2	2	1	1	0	1	2	0	1	1	0	1	2	0	1	1	0	1	2	0	6.9	6.9	6.9	17.549	159	159;188;224;299	0.0045473	1.2791	By MS/MS	By MS/MS		By MS/MS	By MS/MS		6.9	6.9	0	6.9	6.9	0
A0A0A0MRM9;Q14978;S4R349;S4R3C2	A0A0A0MRM9;Q14978	9;9;1;1	9;9;1;1	9;9;1;1	Nucleolar and coiled-body phosphoprotein 1	NOLC1	tr|A0A0A0MRM9|A0A0A0MRM9_HUMAN Nucleolar and coiled-body phosphoprotein 1 (Fragment) OS=Homo sapiens OX=9606 GN=NOLC1 PE=1 SV=1;sp|Q14978|NOLC1_HUMAN Nucleolar and coiled-body phosphoprotein 1 OS=Homo sapiens OX=9606 GN=NOLC1 PE=1 SV=2	4	9	9	9	5	0	0	1	7	1	5	0	0	1	7	1	5	0	0	1	7	1	15.5	15.5	15.5	74.543	708	708;699;258;281	0	75.073	By MS/MS			By matching	By MS/MS	By MS/MS	9.7	0	0	1.1	12.4	1.6
Q9Y3C1;D6RIC3;A0A0C4DGU5;A0A087X2G6	Q9Y3C1;D6RIC3;A0A0C4DGU5;A0A087X2G6	2;1;1;1	2;1;1;1	2;1;1;1	Nucleolar protein 16	NOP16	sp|Q9Y3C1|NOP16_HUMAN Nucleolar protein 16 OS=Homo sapiens OX=9606 GN=NOP16 PE=1 SV=2;tr|D6RIC3|D6RIC3_HUMAN Nucleolar protein 16 OS=Homo sapiens OX=9606 GN=NOP16 PE=1 SV=1;tr|A0A0C4DGU5|A0A0C4DGU5_HUMAN Nucleolar protein 16 OS=Homo sapiens OX=9606 GN=NOP1	4	2	2	2	0	0	0	0	0	1	0	0	0	0	0	1	0	0	0	0	0	1	19.1	19.1	19.1	21.188	178	178;150;231;237	0	3.9403						By MS/MS	0	0	0	0	0	9
A0A494C128;O00567;H0Y653;H0YDU4;Q5JXT2	A0A494C128;O00567;H0Y653;H0YDU4	3;3;2;2;1	3;3;2;2;1	3;3;2;2;1	Nucleolar protein 56	NOP56	tr|A0A494C128|A0A494C128_HUMAN Nucleolar protein 56 OS=Homo sapiens OX=9606 GN=NOP56 PE=1 SV=1;sp|O00567|NOP56_HUMAN Nucleolar protein 56 OS=Homo sapiens OX=9606 GN=NOP56 PE=1 SV=4;tr|H0Y653|H0Y653_HUMAN Nucleolar protein 56 (Fragment) OS=Homo sapiens OX=9	5	3	3	3	0	0	1	0	0	1	0	0	1	0	0	1	0	0	1	0	0	1	7.5	7.5	7.5	53.05	478	478;594;219;252;281	0	4.1014			By MS/MS			By MS/MS	0	0	2.5	0	0	2.5
A0A075B6F9;Q9Y314;M0R1K2;A0A075B797;M0R3B2;M0QX85	A0A075B6F9;Q9Y314;M0R1K2;A0A075B797;M0R3B2	3;3;2;2;2;1	3;3;2;2;2;1	3;3;2;2;2;1	Nitric oxide synthase-interacting protein	NOSIP	tr|A0A075B6F9|A0A075B6F9_HUMAN Nitric oxide synthase-interacting protein OS=Homo sapiens OX=9606 GN=NOSIP PE=1 SV=1;sp|Q9Y314|NOSIP_HUMAN Nitric oxide synthase-interacting protein OS=Homo sapiens OX=9606 GN=NOSIP PE=1 SV=1;tr|M0R1K2|M0R1K2_HUMAN E3 ubiquit	6	3	3	3	0	0	2	0	0	2	0	0	2	0	0	2	0	0	2	0	0	2	19.1	19.1	19.1	33.431	304	304;301;176;232;241;96	0	21.07			By MS/MS			By MS/MS	0	0	15.1	0	0	15.1
A0A6Q8PFC2;Q9UNW9	A0A6Q8PFC2;Q9UNW9	1;1	1;1	1;1	RNA-binding protein Nova-2	NOVA2	tr|A0A6Q8PFC2|A0A6Q8PFC2_HUMAN Neuro-oncological ventral antigen 2 OS=Homo sapiens OX=9606 GN=NOVA2 PE=1 SV=1;sp|Q9UNW9|NOVA2_HUMAN RNA-binding protein Nova-2 OS=Homo sapiens OX=9606 GN=NOVA2 PE=1 SV=1	2	1	1	1	0	0	1	0	0	0	0	0	1	0	0	0	0	0	1	0	0	0	3.6	3.6	3.6	55.618	556	556;492	0	3.2767			By MS/MS				0	0	3.6	0	0	0
A0A590UJY0;Q8WTW4	A0A590UJY0;Q8WTW4	1;1	1;1	1;1	Nitrogen permease regulator 2-like protein	NPRL2	tr|A0A590UJY0|A0A590UJY0_HUMAN GATOR complex protein NPRL2 OS=Homo sapiens OX=9606 GN=NPRL2 PE=1 SV=1;sp|Q8WTW4|NPRL2_HUMAN GATOR complex protein NPRL2 OS=Homo sapiens OX=9606 GN=NPRL2 PE=1 SV=2	2	1	1	1	0	0	0	0	0	0	0	0	0	0	0	0	0	0	0	0	0	0	7.7	7.7	7.7	14.721	130	130;380	1	-2							0	0	0	0	0	0
Q5T6F7;F1DAM0;Q13285	Q5T6F7;F1DAM0;Q13285	1;1;1	1;1;1	1;1;1	Steroidogenic factor 1	NR5A1	tr|Q5T6F7|Q5T6F7_HUMAN Steroidogenic factor 1 (Fragment) OS=Homo sapiens OX=9606 GN=NR5A1 PE=1 SV=1;tr|F1DAM0|F1DAM0_HUMAN Steroidogenic factor 1 OS=Homo sapiens OX=9606 GN=NR5A1 PE=1 SV=1;sp|Q13285|STF1_HUMAN Steroidogenic factor 1 OS=Homo sapiens OX=9606	3	1	1	1	0	0	1	0	0	1	0	0	1	0	0	1	0	0	1	0	0	1	8.6	8.6	8.6	28.043	245	245;421;461	0.0025873	1.4848			By matching			By MS/MS	0	0	8.6	0	0	8.6
Q96F24	Q96F24	3	3	3	Nuclear receptor-binding factor 2	NRBF2	sp|Q96F24|NRBF2_HUMAN Nuclear receptor-binding factor 2 OS=Homo sapiens OX=9606 GN=NRBF2 PE=1 SV=1	1	3	3	3	0	0	2	0	0	2	0	0	2	0	0	2	0	0	2	0	0	2	7.3	7.3	7.3	32.377	287	287	0	2.5822			By MS/MS			By MS/MS	0	0	6.6	0	0	6.6
F8W6G1;Q9UHY1	F8W6G1;Q9UHY1	2;2	2;2	2;2	Nuclear receptor-binding protein	NRBP1	tr|F8W6G1|F8W6G1_HUMAN Nuclear receptor-binding protein OS=Homo sapiens OX=9606 GN=NRBP1 PE=1 SV=1;sp|Q9UHY1|NRBP_HUMAN Nuclear receptor-binding protein OS=Homo sapiens OX=9606 GN=NRBP1 PE=1 SV=1	2	2	2	2	0	0	1	0	0	1	0	0	1	0	0	1	0	0	1	0	0	1	5.7	5.7	5.7	60.829	543	543;535	0	8.3696			By MS/MS			By MS/MS	0	0	2.8	0	0	2.8
Q96IY1;Q5SY74	Q96IY1;Q5SY74	2;1	2;1	2;1	Kinetochore-associated protein NSL1 homolog	NSL1	sp|Q96IY1|NSL1_HUMAN Kinetochore-associated protein NSL1 homolog OS=Homo sapiens OX=9606 GN=NSL1 PE=1 SV=3;tr|Q5SY74|Q5SY74_HUMAN Kinetochore-associated protein NSL1 homolog OS=Homo sapiens OX=9606 GN=NSL1 PE=1 SV=1	2	2	2	2	0	0	0	0	0	1	0	0	0	0	0	1	0	0	0	0	0	1	11.4	11.4	11.4	32.162	281	281;172	0	9.176						By MS/MS	0	0	0	0	0	6
Q8WV22;H3BSL0;H3BR73;I3L1I3;H3BR31;H3BN81;H3BV05	Q8WV22;H3BSL0;H3BR73;I3L1I3	8;4;4;4;1;1;1	8;4;4;4;1;1;1	8;4;4;4;1;1;1	Non-structural maintenance of chromosomes element 1 homolog	NSMCE1	sp|Q8WV22|NSE1_HUMAN Non-structural maintenance of chromosomes element 1 homolog OS=Homo sapiens OX=9606 GN=NSMCE1 PE=1 SV=5;tr|H3BSL0|H3BSL0_HUMAN Non-structural maintenance of chromosomes element 1 homolog (Fragment) OS=Homo sapiens OX=9606 GN=NSMCE1 PE=	7	8	8	8	0	0	4	1	1	7	0	0	4	1	1	7	0	0	4	1	1	7	42.9	42.9	42.9	30.855	266	266;138;144;193;70;73;78	0	34.932			By MS/MS	By matching	By matching	By MS/MS	0	0	18.8	3.4	5.3	36.1
Q96MF7;E5RFJ1;E5RK09;E5RG00;E5RIM1;A0A087WTZ8;E5RHW9	Q96MF7;E5RFJ1	3;2;1;1;1;1;1	3;2;1;1;1;1;1	3;2;1;1;1;1;1	E3 SUMO-protein ligase NSE2	NSMCE2	sp|Q96MF7|NSE2_HUMAN E3 SUMO-protein ligase NSE2 OS=Homo sapiens OX=9606 GN=NSMCE2 PE=1 SV=2;tr|E5RFJ1|E5RFJ1_HUMAN E3 SUMO-protein ligase NSE2 OS=Homo sapiens OX=9606 GN=NSMCE2 PE=1 SV=1	7	3	3	3	0	0	1	0	0	2	0	0	1	0	0	2	0	0	1	0	0	2	19.8	19.8	19.8	27.932	247	247;187;44;80;139;157;193	0	25.239			By matching			By MS/MS	0	0	9.7	0	0	15
Q9NXX6;Q8N140	Q9NXX6	5;1	5;1	5;1	Non-structural maintenance of chromosomes element 4 homolog A	NSMCE4A	sp|Q9NXX6|NSE4A_HUMAN Non-structural maintenance of chromosomes element 4 homolog A OS=Homo sapiens OX=9606 GN=NSMCE4A PE=1 SV=2	2	5	5	5	0	0	2	0	0	2	0	0	2	0	0	2	0	0	2	0	0	2	14.3	14.3	14.3	44.301	385	385;333	0	14.794			By MS/MS			By MS/MS	0	0	7	0	0	7.5
J3KT62;J3QLV5;J3QRI6;Q9H0G5	J3KT62;J3QLV5;J3QRI6;Q9H0G5	1;1;1;1	1;1;1;1	1;1;1;1	Nuclear speckle splicing regulatory protein 1	NSRP1	tr|J3KT62|J3KT62_HUMAN Nuclear speckle-splicing regulatory protein 1 OS=Homo sapiens OX=9606 GN=NSRP1 PE=1 SV=1;tr|J3QLV5|J3QLV5_HUMAN Nuclear speckle-splicing regulatory protein 1 OS=Homo sapiens OX=9606 GN=NSRP1 PE=1 SV=1;tr|J3QRI6|J3QRI6_HUMAN Nuclear s	4	1	1	1	1	1	0	1	1	0	1	1	0	1	1	0	1	1	0	1	1	0	31	31	31	4.6682	42	42;74;92;558	0.0052441	1.1918	By MS/MS	By MS/MS		By MS/MS	By MS/MS		31	31	0	31	31	0
Q08J23	Q08J23	3	3	3	tRNA (cytosine(34)-C(5))-methyltransferase	NSUN2	sp|Q08J23|NSUN2_HUMAN RNA cytosine C(5)-methyltransferase NSUN2 OS=Homo sapiens OX=9606 GN=NSUN2 PE=1 SV=2	1	3	3	3	0	0	2	0	0	1	0	0	2	0	0	1	0	0	2	0	0	1	5.9	5.9	5.9	86.47	767	767	0	2.4917			By MS/MS			By MS/MS	0	0	3.5	0	0	1.4
A0A6Q8PHB5;A0A6Q8PHP0;P49902	A0A6Q8PHB5;A0A6Q8PHP0;P49902	1;1;1	1;1;1	1;1;1	Cytosolic purine 5-nucleotidase	NT5C2	tr|A0A6Q8PHB5|A0A6Q8PHB5_HUMAN Cytosolic purine 5-nucleotidase OS=Homo sapiens OX=9606 GN=NT5C2 PE=1 SV=1;tr|A0A6Q8PHP0|A0A6Q8PHP0_HUMAN Cytosolic purine 5-nucleotidase OS=Homo sapiens OX=9606 GN=NT5C2 PE=1 SV=1;sp|P49902|5NTC_HUMAN Cytosolic purine 5-n	3	1	1	1	0	0	1	0	0	1	0	0	1	0	0	1	0	0	1	0	0	1	2.8	2.8	2.8	50.147	436	436;569;561	0.0084615	0.99968			By MS/MS			By matching	0	0	2.8	0	0	2.8
I3L3A0;I3L531;P53384	I3L3A0;I3L531;P53384	1;1;1	1;1;1	1;1;1	Cytosolic Fe-S cluster assembly factor NUBP1	NUBP1	tr|I3L3A0|I3L3A0_HUMAN Cytosolic Fe-S cluster assembly factor NUBP1 (Fragment) OS=Homo sapiens OX=9606 GN=NUBP1 PE=1 SV=1;tr|I3L531|I3L531_HUMAN Cytosolic Fe-S cluster assembly factor NUBP1 (Fragment) OS=Homo sapiens OX=9606 GN=NUBP1 PE=1 SV=1;sp|P53384|NU	3	1	1	1	0	0	0	0	0	0	0	0	0	0	0	0	0	0	0	0	0	0	19	19	19	15.72	142	142;168;320	0	7.2431							0	0	0	0	0	0
B7Z6P0;H3BQR2;Q9Y5Y2	B7Z6P0;H3BQR2;Q9Y5Y2	1;1;1	1;1;1	1;1;1	Cytosolic Fe-S cluster assembly factor NUBP2	NUBP2	tr|B7Z6P0|B7Z6P0_HUMAN Cytosolic Fe-S cluster assembly factor NUBP2 OS=Homo sapiens OX=9606 GN=NUBP2 PE=1 SV=1;tr|H3BQR2|H3BQR2_HUMAN Cytosolic Fe-S cluster assembly factor NUBP2 OS=Homo sapiens OX=9606 GN=NUBP2 PE=1 SV=1;sp|Q9Y5Y2|NUBP2_HUMAN Cytosolic Fe	3	1	1	1	0	0	0	0	0	1	0	0	0	0	0	1	0	0	0	0	0	1	20.8	20.8	20.8	13.793	130	130;211;271	0.00048008	2.2561						By MS/MS	0	0	0	0	0	20.8
Q96RS6;A0A7I2V457	Q96RS6	5;2	5;2	5;2	NudC domain-containing protein 1	NUDCD1	sp|Q96RS6|NUDC1_HUMAN NudC domain-containing protein 1 OS=Homo sapiens OX=9606 GN=NUDCD1 PE=1 SV=2	2	5	5	5	0	0	4	0	0	4	0	0	4	0	0	4	0	0	4	0	0	4	11.5	11.5	11.5	66.755	583	583;472	0	86.094			By MS/MS			By MS/MS	0	0	9.6	0	0	8.2
Q8WVJ2;E5RFP0	Q8WVJ2;E5RFP0	3;2	3;2	3;2	NudC domain-containing protein 2	NUDCD2	sp|Q8WVJ2|NUDC2_HUMAN NudC domain-containing protein 2 OS=Homo sapiens OX=9606 GN=NUDCD2 PE=1 SV=1;tr|E5RFP0|E5RFP0_HUMAN NudC domain-containing protein 2 OS=Homo sapiens OX=9606 GN=NUDCD2 PE=1 SV=1	2	3	3	3	0	0	2	0	0	3	0	0	2	0	0	3	0	0	2	0	0	3	31.2	31.2	31.2	17.676	157	157;132	0	17.054			By MS/MS			By MS/MS	0	0	24.2	0	0	31.2
P50583	P50583	1	1	1	Bis(5-nucleosyl)-tetraphosphatase [asymmetrical]	NUDT2	sp|P50583|AP4A_HUMAN Bis(5-nucleosyl)-tetraphosphatase [asymmetrical] OS=Homo sapiens OX=9606 GN=NUDT2 PE=1 SV=3	1	1	1	1	0	0	1	0	0	0	0	0	1	0	0	0	0	0	1	0	0	0	6.1	6.1	6.1	16.829	147	147	0.0037453	1.3082			By MS/MS				0	0	6.1	0	0	0
A0A087WY61;Q14980;H0YFY6;F5H4J1	A0A087WY61;Q14980;H0YFY6	4;4;2;1	4;4;2;1	4;4;2;1	Nuclear mitotic apparatus protein 1	NUMA1	tr|A0A087WY61|A0A087WY61_HUMAN Nuclear mitotic apparatus protein 1 OS=Homo sapiens OX=9606 GN=NUMA1 PE=1 SV=1;sp|Q14980|NUMA1_HUMAN Nuclear mitotic apparatus protein 1 OS=Homo sapiens OX=9606 GN=NUMA1 PE=1 SV=2;tr|H0YFY6|H0YFY6_HUMAN Nuclear mitotic appara	4	4	4	4	1	0	1	2	2	1	1	0	1	2	2	1	1	0	1	2	2	1	3.1	3.1	3.1	236.16	2099	2099;2115;964;851	0	6.5755	By matching		By MS/MS	By MS/MS	By MS/MS	By MS/MS	0.8	0	0.5	1.9	1.9	0.8
G3V3Z8;P49757	G3V3Z8;P49757	1;1	1;1	1;1	Protein numb homolog	NUMB	tr|G3V3Z8|G3V3Z8_HUMAN Protein numb homolog OS=Homo sapiens OX=9606 GN=NUMB PE=1 SV=1;sp|P49757|NUMB_HUMAN Protein numb homolog OS=Homo sapiens OX=9606 GN=NUMB PE=1 SV=2	2	1	1	1	1	1	0	1	1	0	1	1	0	1	1	0	1	1	0	1	1	0	4.1	4.1	4.1	54.027	507	507;651	0.0056293	1.1773	By MS/MS	By matching		By MS/MS	By MS/MS		4.1	4.1	0	4.1	4.1	0
G3V1T4;P57740	G3V1T4;P57740	1;1	1;1	1;1	Nuclear pore complex protein Nup107	NUP107	tr|G3V1T4|G3V1T4_HUMAN Nuclear pore complex protein Nup107 OS=Homo sapiens OX=9606 GN=NUP107 PE=1 SV=1;sp|P57740|NU107_HUMAN Nuclear pore complex protein Nup107 OS=Homo sapiens OX=9606 GN=NUP107 PE=1 SV=1	2	1	1	1	0	1	0	1	0	0	0	1	0	1	0	0	0	1	0	1	0	0	13.6	13.6	13.6	11.348	103	103;925	0.0078034	1.0646		By MS/MS		By MS/MS			0	13.6	0	13.6	0	0
Q8WUM0	Q8WUM0	2	2	2	Nuclear pore complex protein Nup133	NUP133	sp|Q8WUM0|NU133_HUMAN Nuclear pore complex protein Nup133 OS=Homo sapiens OX=9606 GN=NUP133 PE=1 SV=2	1	2	2	2	0	0	1	0	0	2	0	0	1	0	0	2	0	0	1	0	0	2	2.8	2.8	2.8	128.98	1156	1156	0	10.29			By MS/MS			By MS/MS	0	0	1.4	0	0	2.8
P49790	P49790	8	8	8	Nuclear pore complex protein Nup153	NUP153	sp|P49790|NU153_HUMAN Nuclear pore complex protein Nup153 OS=Homo sapiens OX=9606 GN=NUP153 PE=1 SV=2	1	8	8	8	1	0	6	1	1	6	1	0	6	1	1	6	1	0	6	1	1	6	9.2	9.2	9.2	153.94	1475	1475	0	12.417	By MS/MS		By MS/MS	By MS/MS	By MS/MS	By MS/MS	1.1	0	6.8	1.1	1.1	7.1
C9IYQ7;F8WCF5;F8WEL4;Q8NFH5	C9IYQ7;F8WCF5;F8WEL4;Q8NFH5	1;1;1;1	1;1;1;1	1;1;1;1	Nucleoporin NUP53	NUP35	tr|C9IYQ7|C9IYQ7_HUMAN Nucleoporin NUP35 (Fragment) OS=Homo sapiens OX=9606 GN=NUP35 PE=1 SV=1;tr|F8WCF5|F8WCF5_HUMAN Nucleoporin NUP35 OS=Homo sapiens OX=9606 GN=NUP35 PE=1 SV=1;tr|F8WEL4|F8WEL4_HUMAN Nucleoporin NUP35 OS=Homo sapiens OX=9606 GN=NUP35 PE=	4	1	1	1	1	1	0	1	1	0	1	1	0	1	1	0	1	1	0	1	1	0	16.5	16.5	16.5	11.723	115	115;136;152;326	0	7.3298	By MS/MS	By MS/MS		By matching	By MS/MS		16.5	16.5	0	16.5	16.5	0
Q8NFH4;F8VTY2	Q8NFH4;F8VTY2	6;3	6;3	6;3	Nucleoporin Nup37	NUP37	sp|Q8NFH4|NUP37_HUMAN Nucleoporin Nup37 OS=Homo sapiens OX=9606 GN=NUP37 PE=1 SV=1;tr|F8VTY2|F8VTY2_HUMAN Nucleoporin Nup37 (Fragment) OS=Homo sapiens OX=9606 GN=NUP37 PE=1 SV=8	2	6	6	6	0	0	5	0	0	5	0	0	5	0	0	5	0	0	5	0	0	5	22.4	22.4	22.4	36.707	326	326;208	0	9.2815			By MS/MS			By MS/MS	0	0	19.9	0	0	22.4
Q9UKX7;B0QY21	Q9UKX7	5;2	5;2	5;2	Nuclear pore complex protein Nup50	NUP50	sp|Q9UKX7|NUP50_HUMAN Nuclear pore complex protein Nup50 OS=Homo sapiens OX=9606 GN=NUP50 PE=1 SV=2	2	5	5	5	0	0	4	0	0	4	0	0	4	0	0	4	0	0	4	0	0	4	24.6	24.6	24.6	50.144	468	468;178	0	29.95			By MS/MS			By MS/MS	0	0	18.2	0	0	18.2
Q7Z3B4	Q7Z3B4	7	7	7	Nucleoporin p54	NUP54	sp|Q7Z3B4|NUP54_HUMAN Nucleoporin p54 OS=Homo sapiens OX=9606 GN=NUP54 PE=1 SV=2	1	7	7	7	0	0	5	0	0	4	0	0	5	0	0	4	0	0	5	0	0	4	20.5	20.5	20.5	55.435	507	507	0	42.016			By MS/MS			By MS/MS	0	0	15.6	0	0	12.2
[truncated: 635 more rows]
[truncated: 24 more columns]

## Sheet: simple table
Gene names	Number of proteins	Peptides	Score	Sequence coverage DASA_1 [%]	Sequence coverage DASA_2 [%]	Sequence coverage DASA_3 [%]	Sequence coverage DH5_1 [%]	Sequence coverage DH5_2 [%]	Sequence coverage DH5_3 [%]	Intensity DASA_1	Intensity DASA_2	Intensity DASA_3	Intensity DH5_1	Intensity DH5_2	Intensity DH5_3
AAGAB	1	1	1.9312	0	0	4.4	0	0	4.4	0	0	39631000	0	0	61648000
AAK1	2	1	2.3606	0	0	1.5	0	0	1.5	0	0	14266000	0	0	20430000
[truncated: 1,541 more rows]

## Sheet: Stats with imputed data
Gene	DASA_1	DASA_2	DASA_3	DH5_1	DH5_2	DH5_3	FC_DH5/DASA_1	FC_DH5/DASA_2	FC_DH5/DASA_3	FC(DH5/DASA)	log2(FC(DH5/DASA))	sam.p(unpaired)	(-)LOG10(sam(unpaired))
[truncated: 1,543 more rows]
