# Supplementary material for: Target protein identification in live cells and organisms with a non-diffusive proximity tagging system
Source: eLife. 2024 Dec 27;13:RP102667. doi: 10.7554/eLife.102667 (PMC11677243; doi:10.7554/eLife.102667)
Supplement: Figure 6—source data 3. [file elife-102667-fig6-data3.xlsx]

## Sheet: Sheet1
Protein	Protein ID	Entry Name	Gene	Protein Description	Ratios HL.1	Ratios HL.2	Ratios HL.3	No of NA	Median Log2 Ratios HL.1	Median Log2 Ratios HL.2	Median Log2 Ratios HL.3	No of NA	Mean_Raio	Mean_Log2	Rank
sp|Q9UGR2|Z3H7B_HUMAN	Q9UGR2	Z3H7B_HUMAN	ZC3H7B	Zinc finger CCCH domain-containing protein 7B	1	NA	1	1	3.93543	NA	3.98788	1	1	3.96166	1
sp|Q7Z4G4|TRM11_HUMAN	Q7Z4G4	TRM11_HUMAN	TRMT11	tRNA (guanine(10)-N2)-methyltransferase homolog	0	1	1	0	NA	3.63806	3.32993	1	0.666667	3.484	2
sp|Q6ZVM7|TM1L2_HUMAN	Q6ZVM7	TM1L2_HUMAN	TOM1L2	TOM1-like protein 2	0	1	1	0	NA	3.75594	3.0321	1	0.666667	3.39402	3
sp|O94864|ST65G_HUMAN	O94864	ST65G_HUMAN	SUPT7L	STAGA complex 65 subunit gamma	1	NA	1	1	2.49996	NA	3.88091	1	1	3.19043	4
sp|Q6PI48|SYDM_HUMAN	Q6PI48	SYDM_HUMAN	DARS2	Aspartate--tRNA ligase, mitochondrial	1	NA	1	1	1.54171	NA	2.93312	1	1	2.23742	5
sp|O43617|TPPC3_HUMAN	O43617	TPPC3_HUMAN	TRAPPC3	Trafficking protein particle complex subunit 3	2	1	0	0	3.60723	0.754173	NA	1	1	2.1807	6
sp|P62877|RBX1_HUMAN	P62877	RBX1_HUMAN	RBX1	E3 ubiquitin-protein ligase RBX1	1	1	1	0	0.788476	2.87334	2.75864	0	1	2.14015	7
sp|Q9Y6E0|STK24_HUMAN	Q9Y6E0	STK24_HUMAN	STK24	Serine/threonine-protein kinase 24	1	1	1	0	2.56754	-0.442071	3.64752	0	1	1.92433	8
sp|Q96GM8|TOE1_HUMAN	Q96GM8	TOE1_HUMAN	TOE1	Target of EGR1 protein 1	0	1	1	0	NA	-0.177318	3.41194	1	0.666667	1.61731	9
sp|Q9C0B0|UNK_HUMAN	Q9C0B0	UNK_HUMAN	UNK	RING finger protein unkempt homolog	2	3	2	0	2.5222	-0.215193	2.53583	0	2.33333	1.61428	10
sp|Q8N1G4|LRC47_HUMAN	Q8N1G4	LRC47_HUMAN	LRRC47	Leucine-rich repeat-containing protein 47	0	1	1	0	NA	4.09705	-0.967371	1	0.666667	1.56484	11
sp|Q05048|CSTF1_HUMAN	Q05048	CSTF1_HUMAN	CSTF1	Cleavage stimulation factor subunit 1	0	1	1	0	NA	1.17103	1.94464	1	0.666667	1.55783	12
sp|P62699|YPEL5_HUMAN	P62699	YPEL5_HUMAN	YPEL5	Protein yippee-like 5	1	1	1	0	0.532764	1.3013	2.63575	0	1	1.48994	13
sp|O75665|OFD1_HUMAN	O75665	OFD1_HUMAN	OFD1	Centriole and centriolar satellite protein OFD1	3	NA	2	1	1.4334	NA	1.45322	1	2.5	1.44331	14
sp|O75449|KTNA1_HUMAN	O75449	KTNA1_HUMAN	KATNA1	Katanin p60 ATPase-containing subunit A1	0	2	2	0	NA	2.21667	0.666354	1	1.33333	1.44151	15
sp|Q86US8|EST1A_HUMAN	Q86US8	EST1A_HUMAN	SMG6	Telomerase-binding protein EST1A	NA	1	1	1	NA	0.87091	1.88973	1	1	1.38032	16
sp|Q1MSJ5|CSPP1_HUMAN	Q1MSJ5	CSPP1_HUMAN	CSPP1	Centrosome and spindle pole-associated protein 1	1	1	1	0	2.33627	-0.327176	1.99215	0	1	1.33375	17
sp|P17482|HXB9_HUMAN	P17482	HXB9_HUMAN	HOXB9	Homeobox protein Hox-B9	1	1	0	0	0.86527	1.53581	NA	1	0.666667	1.20054	18
sp|P55039|DRG2_HUMAN	P55039	DRG2_HUMAN	DRG2	Developmentally-regulated GTP-binding protein 2	1	1	0	0	1.49197	0.828854	NA	1	0.666667	1.16041	19
sp|Q9H0R4|HDHD2_HUMAN	Q9H0R4	HDHD2_HUMAN	HDHD2	Haloacid dehalogenase-like hydrolase domain-containing protein 2	2	2	1	0	2.73315	0.434239	0.276546	0	1.66667	1.14798	20
sp|P09497|CLCB_HUMAN	P09497	CLCB_HUMAN	CLTB	Clathrin light chain B	NA	1	1	1	NA	-0.761882	3.04522	1	1	1.14167	21
sp|Q9Y6R9|CCD61_HUMAN	Q9Y6R9	CCD61_HUMAN	CCDC61	Centrosomal protein CCDC61	2	NA	2	1	1.73325	NA	0.530258	1	2	1.13175	22
sp|O00743|PPP6_HUMAN	O00743	PPP6_HUMAN	PPP6C	Serine/threonine-protein phosphatase 6 catalytic subunit	3	3	2	0	0.0622102	0.897719	2.25461	0	2.66667	1.07151	23
sp|Q86YT6|MIB1_HUMAN	Q86YT6	MIB1_HUMAN	MIB1	E3 ubiquitin-protein ligase MIB1	8	9	10	0	2.03785	-0.247661	1.33127	0	9	1.04049	24
sp|P54646|AAPK2_HUMAN	P54646	AAPK2_HUMAN	PRKAA2	5'-AMP-activated protein kinase catalytic subunit alpha-2	1	1	1	0	2.97999	0.541109	-0.425442	0	1	1.03189	25
sp|Q15650|TRIP4_HUMAN	Q15650	TRIP4_HUMAN	TRIP4	Activating signal cointegrator 1	1	1	1	0	2.48505	0.0315226	0.557386	0	1	1.02465	26
sp|Q13136|LIPA1_HUMAN	Q13136	LIPA1_HUMAN	PPFIA1	Liprin-alpha-1	2	1	1	0	2.95547	-0.0713641	0.119514	0	1.33333	1.0012	27
tr|F5H875|F5H875_HUMAN	F5H875	F5H875_HUMAN	CHMP1A	Charged multivesicular body protein 1A	1	1	NA	1	1.40128	0.580568	NA	1	1	0.990923	28
sp|Q96M89|CC138_HUMAN	Q96M89	CC138_HUMAN	CCDC138	Coiled-coil domain-containing protein 138	4	1	1	0	1.77758	0.933687	0.255282	0	2	0.98885	29
sp|P51970|NDUA8_HUMAN	P51970	NDUA8_HUMAN	NDUFA8	NADH dehydrogenase [ubiquinone] 1 alpha subcomplex subunit 8	NA	1	1	1	NA	0.61608	1.35538	1	1	0.985731	30
sp|P00918|CAH2_HUMAN	P00918	CAH2_HUMAN	CA2	Carbonic anhydrase 2	2	1	1	0	1.73624	-0.372559	1.5109	0	1.33333	0.958196	31
sp|Q14166|TTL12_HUMAN	Q14166	TTL12_HUMAN	TTLL12	Tubulin--tyrosine ligase-like protein 12	3	2	0	0	0.254614	1.65806	NA	1	1.66667	0.956335	32
sp|Q13685|AAMP_HUMAN	Q13685	AAMP_HUMAN	AAMP	Angio-associated migratory cell protein	1	2	1	0	1.38566	0.836141	0.635616	0	1.33333	0.952474	33
sp|Q9NPJ6|MED4_HUMAN	Q9NPJ6	MED4_HUMAN	MED4	Mediator of RNA polymerase II transcription subunit 4	2	2	1	0	1.95084	0.161831	0.715637	0	1.66667	0.942769	34
sp|Q86YM7|HOME1_HUMAN	Q86YM7	HOME1_HUMAN	HOMER1	Homer protein homolog 1	1	NA	2	1	1.41585	NA	0.44675	1	1.5	0.9313	35
sp|Q15631|TSN_HUMAN	Q15631	TSN_HUMAN	TSN	Translin	1	1	1	0	2.26407	0.121156	0.284029	0	1	0.889753	36
sp|Q9UPR3|SMG5_HUMAN	Q9UPR3	SMG5_HUMAN	SMG5	Nonsense-mediated mRNA decay factor SMG5	1	1	2	0	2.1187	0.348695	0.14879	0	1.33333	0.872062	37
sp|Q8IX18|DHX40_HUMAN	Q8IX18	DHX40_HUMAN	DHX40	Probable ATP-dependent RNA helicase DHX40	2	1	2	0	1.54591	0.183339	0.884903	0	1.66667	0.871383	38
sp|Q99661|KIF2C_HUMAN	Q99661	KIF2C_HUMAN	KIF2C	Kinesin-like protein KIF2C	6	1	4	0	-0.768559	3.39512	-0.0975801	0	3.66667	0.842993	39
sp|Q9Y2D8|ADIP_HUMAN	Q9Y2D8	ADIP_HUMAN	SSX2IP	Afadin- and alpha-actinin-binding protein	1	0	1	0	-0.372139	NA	2.01684	1	0.666667	0.822352	40
sp|Q9UBQ0|VPS29_HUMAN	Q9UBQ0	VPS29_HUMAN	VPS29	Vacuolar protein sorting-associated protein 29	2	1	2	0	-0.0499033	0.00559667	2.35023	0	1.66667	0.768642	41
sp|P00491|PNPH_HUMAN	P00491	PNPH_HUMAN	PNP	Purine nucleoside phosphorylase	1	0	1	0	0.790123	NA	0.718027	1	0.666667	0.754075	42
sp|Q01085|TIAR_HUMAN	Q01085	TIAR_HUMAN	TIAL1	Nucleolysin TIAR	1	3	NA	1	0.452667	1.03899	NA	1	2	0.745829	43
sp|Q9NPI6|DCP1A_HUMAN	Q9NPI6	DCP1A_HUMAN	DCP1A	mRNA-decapping enzyme 1A	3	1	1	0	1.22176	-0.056956	1.05805	0	1.66667	0.740951	44
sp|Q8IUF8|RIOX2_HUMAN	Q8IUF8	RIOX2_HUMAN	RIOX2	Ribosomal oxygenase 2	1	NA	1	1	1.85075	NA	-0.412485	1	1	0.719134	45
sp|Q9NUQ6|SPS2L_HUMAN	Q9NUQ6	SPS2L_HUMAN	SPATS2L	SPATS2-like protein	1	1	3	0	3.5384	-1.43942	0.0512196	0	1.66667	0.716733	46
sp|Q8N0X7|SPART_HUMAN	Q8N0X7	SPART_HUMAN	SPART	Spartin	NA	1	1	1	NA	1.68885	-0.296586	1	1	0.696133	47
sp|Q9BVG4|PBDC1_HUMAN	Q9BVG4	PBDC1_HUMAN	PBDC1	Protein PBDC1	1	2	1	0	0.498973	0.774954	0.691532	0	1.33333	0.655153	48
sp|Q2M1P5|KIF7_HUMAN	Q2M1P5	KIF7_HUMAN	KIF7	Kinesin-like protein KIF7	13	11	14	0	1.40753	-0.043383	0.59375	0	12.6667	0.652632	49
sp|Q8IZH2|XRN1_HUMAN	Q8IZH2	XRN1_HUMAN	XRN1	5'-3' exoribonuclease 1	1	1	0	0	1.23237	0.0716856	NA	1	0.666667	0.652026	50
sp|Q96QR8|PURB_HUMAN	Q96QR8	PURB_HUMAN	PURB	Transcriptional activator protein Pur-beta	2	5	1	0	1.23605	0.202008	0.480577	0	2.66667	0.639544	51
sp|Q13325|IFIT5_HUMAN	Q13325	IFIT5_HUMAN	IFIT5	Interferon-induced protein with tetratricopeptide repeats 5	1	1	1	0	0.950402	1.04528	-0.136781	0	1	0.619632	52
sp|Q96RK4|BBS4_HUMAN	Q96RK4	BBS4_HUMAN	BBS4	Bardet-Biedl syndrome 4 protein	1	1	1	0	3.3135	-1.77978	0.290026	0	1	0.607915	53
sp|Q32P44|EMAL3_HUMAN	Q32P44	EMAL3_HUMAN	EML3	Echinoderm microtubule-associated protein-like 3	NA	4	3	1	NA	-1.09032	2.30165	1	3.5	0.605666	54
sp|Q69YN2|C19L1_HUMAN	Q69YN2	C19L1_HUMAN	CWF19L1	CWF19-like protein 1	1	1	2	0	0.059975	-0.253328	1.99107	0	1.33333	0.599238	55
sp|Q9Y696|CLIC4_HUMAN	Q9Y696	CLIC4_HUMAN	CLIC4	Chloride intracellular channel protein 4	0	2	2	0	NA	0.445663	0.726322	1	1.33333	0.585992	56
sp|Q8TAF3|WDR48_HUMAN	Q8TAF3	WDR48_HUMAN	WDR48	WD repeat-containing protein 48	1	1	NA	1	1.00094	0.168578	NA	1	1	0.584759	57
sp|Q96BR5|COA7_HUMAN	Q96BR5	COA7_HUMAN	COA7	Cytochrome c oxidase assembly factor 7	1	3	1	0	0.875943	0.197723	0.643432	0	1.66667	0.572366	58
sp|O43747|AP1G1_HUMAN	O43747	AP1G1_HUMAN	AP1G1	AP-1 complex subunit gamma-1	1	1	1	0	0.641994	1.01576	0.0508154	0	1	0.569523	59
sp|Q9Y617|SERC_HUMAN	Q9Y617	SERC_HUMAN	PSAT1	Phosphoserine aminotransferase	2	4	1	0	1.92909	-0.499967	0.195348	0	2.33333	0.541489	60
sp|Q14493|SLBP_HUMAN	Q14493	SLBP_HUMAN	SLBP	Histone RNA hairpin-binding protein	0	1	1	0	NA	0.843396	0.231836	1	0.666667	0.537616	61
sp|Q8WXW3|PIBF1_HUMAN	Q8WXW3	PIBF1_HUMAN	PIBF1	Progesterone-induced-blocking factor 1	4	6	3	0	1.10699	-0.292393	0.77795	0	4.33333	0.530849	62
sp|Q6P4F7|RHGBA_HUMAN	Q6P4F7	RHGBA_HUMAN	ARHGAP11A	Rho GTPase-activating protein 11A	1	NA	1	1	0.159011	NA	0.859882	1	1	0.509446	63
sp|Q9H9G7|AGO3_HUMAN	Q9H9G7	AGO3_HUMAN	AGO3	Protein argonaute-3	5	0	3	0	0.619382	NA	0.388869	1	2.66667	0.504126	64
sp|P10768|ESTD_HUMAN	P10768	ESTD_HUMAN	ESD	S-formylglutathione hydrolase	1	3	2	0	0.449773	0.383992	0.668242	0	2	0.500669	65
sp|Q9UH17|ABC3B_HUMAN	Q9UH17	ABC3B_HUMAN	APOBEC3B	DNA dC->dU-editing enzyme APOBEC-3B	NA	1	1	1	NA	0.558353	0.410571	1	1	0.484462	66
sp|O00442|RTCA_HUMAN	O00442	RTCA_HUMAN	RTCA	RNA 3'-terminal phosphate cyclase	1	0	1	0	1.17047	NA	-0.230556	1	0.666667	0.469957	67
sp|L0R819|ASURF_HUMAN	L0R819	ASURF_HUMAN	ASDURF	ASNSD1 upstream open reading frame protein	1	1	0	0	0.808209	0.128605	NA	1	0.666667	0.468407	68
sp|Q15007|FL2D_HUMAN	Q15007	FL2D_HUMAN	WTAP	Pre-mRNA-splicing regulator WTAP	2	1	4	0	0.788548	-0.099601	0.651047	0	2.33333	0.446664	69
sp|A5D8V6|VP37C_HUMAN	A5D8V6	VP37C_HUMAN	VPS37C	Vacuolar protein sorting-associated protein 37C	1	1	1	0	0.875357	0.448025	0.0136159	0	1	0.445666	70
sp|Q96FW1|OTUB1_HUMAN	Q96FW1	OTUB1_HUMAN	OTUB1	Ubiquitin thioesterase OTUB1	3	3	4	0	0.699093	0.0865354	0.477084	0	3.33333	0.420904	71
sp|Q71SY5|MED25_HUMAN	Q71SY5	MED25_HUMAN	MED25	Mediator of RNA polymerase II transcription subunit 25	1	1	1	0	1.39385	-0.0514633	-0.0805286	0	1	0.420619	72
sp|Q92552|RT27_HUMAN	Q92552	RT27_HUMAN	MRPS27	Small ribosomal subunit protein mS27	2	1	1	0	1.09758	0.219061	-0.0573145	0	1.33333	0.419776	73
sp|P22681|CBL_HUMAN	P22681	CBL_HUMAN	CBL	E3 ubiquitin-protein ligase CBL	1	2	3	0	1.36429	-0.196819	0.0445015	0	2	0.403992	74
sp|Q6P1N0|C2D1A_HUMAN	Q6P1N0	C2D1A_HUMAN	CC2D1A	Coiled-coil and C2 domain-containing protein 1A	1	2	2	0	0.89087	0.178959	0.13804	0	1.66667	0.402623	75
sp|Q99569|PKP4_HUMAN	Q99569	PKP4_HUMAN	PKP4	Plakophilin-4	2	1	1	0	0.754075	0.0752104	0.372086	0	1.33333	0.400457	76
sp|P49591|SYSC_HUMAN	P49591	SYSC_HUMAN	SARS1	Serine--tRNA ligase, cytoplasmic	3	4	3	0	0.219879	0.622939	0.340521	0	3.33333	0.394446	77
sp|O15234|CASC3_HUMAN	O15234	CASC3_HUMAN	CASC3	Protein CASC3	24	27	24	0	0.574911	0.383564	0.222233	0	25	0.393569	78
sp|P98170|XIAP_HUMAN	P98170	XIAP_HUMAN	XIAP	E3 ubiquitin-protein ligase XIAP	1	1	1	0	0.444587	0.113573	0.594836	0	1	0.384332	79
sp|Q9UPN4|CP131_HUMAN	Q9UPN4	CP131_HUMAN	CEP131	Centrosomal protein of 131 kDa	14	10	18	0	1.00136	-0.489874	0.62725	0	14	0.379579	80
sp|Q9HAU5|RENT2_HUMAN	Q9HAU5	RENT2_HUMAN	UPF2	Regulator of nonsense transcripts 2	20	21	20	0	0.730988	0.447923	-0.0453982	0	20.3333	0.377838	81
sp|Q9UK41|VPS28_HUMAN	Q9UK41	VPS28_HUMAN	VPS28	Vacuolar protein sorting-associated protein 28 homolog	3	2	3	0	0.273176	0.702992	0.154551	0	2.66667	0.376907	82
sp|O95394|AGM1_HUMAN	O95394	AGM1_HUMAN	PGM3	Phosphoacetylglucosamine mutase	2	1	2	0	-0.0192522	1.54054	-0.417064	0	1.66667	0.368075	83
sp|Q8TAP9|MPLKI_HUMAN	Q8TAP9	MPLKI_HUMAN	MPLKIP	M-phase-specific PLK1-interacting protein	1	2	0	0	0.784821	-0.0540572	NA	1	1	0.365382	84
sp|O00273|DFFA_HUMAN	O00273	DFFA_HUMAN	DFFA	DNA fragmentation factor subunit alpha	2	4	1	0	0.425258	0.403864	0.242192	0	2.33333	0.357104	85
sp|P12955|PEPD_HUMAN	P12955	PEPD_HUMAN	PEPD	Xaa-Pro dipeptidase	1	1	2	0	0.422043	-0.318567	0.958396	0	1.33333	0.353957	86
sp|P27448|MARK3_HUMAN	P27448	MARK3_HUMAN	MARK3	MAP/microtubule affinity-regulating kinase 3	1	1	1	0	1.58529	-0.94259	0.345507	0	1	0.329403	87
sp|Q9BUT9|MCRI2_HUMAN	Q9BUT9	MCRI2_HUMAN	MCRIP2	MAPK regulated corepressor interacting protein 2	8	8	9	0	0.276072	0.373373	0.335113	0	8.33333	0.328186	88
sp|Q8ND24|RN214_HUMAN	Q8ND24	RN214_HUMAN	RNF214	RING finger protein 214	3	5	3	0	0.662195	0.584038	-0.275478	0	3.66667	0.323585	89
sp|P06730|IF4E_HUMAN	P06730	IF4E_HUMAN	EIF4E	Eukaryotic translation initiation factor 4E	2	3	2	0	0.373422	0.131379	0.439193	0	2.33333	0.314665	90
sp|Q9BZI7|REN3B_HUMAN	Q9BZI7	REN3B_HUMAN	UPF3B	Regulator of nonsense transcripts 3B	6	12	6	0	0.413264	0.302225	0.214907	0	8	0.310132	91
sp|C9JLW8|MCRI1_HUMAN	C9JLW8	MCRI1_HUMAN	MCRIP1	Mapk-regulated corepressor-interacting protein 1	6	6	7	0	0.533135	0.153765	0.233792	0	6.33333	0.306897	92
sp|P49589|SYCC_HUMAN	P49589	SYCC_HUMAN	CARS1	Cysteine--tRNA ligase, cytoplasmic	2	4	2	0	0.617726	0.206177	0.09141	0	2.66667	0.305104	93
sp|Q9H074|PAIP1_HUMAN	Q9H074	PAIP1_HUMAN	PAIP1	Polyadenylate-binding protein-interacting protein 1	7	9	8	0	0.639792	0.224367	0.0489114	0	8	0.304357	94
sp|Q99996|AKAP9_HUMAN	Q99996	AKAP9_HUMAN	AKAP9	A-kinase anchor protein 9	1	3	0	0	-0.0602106	0.61832	NA	1	1.33333	0.279055	95
sp|O95163|ELP1_HUMAN	O95163	ELP1_HUMAN	ELP1	Elongator complex protein 1	0	1	1	0	NA	0.875437	-0.323005	1	0.666667	0.276216	96
sp|Q9NUP9|LIN7C_HUMAN	Q9NUP9	LIN7C_HUMAN	LIN7C	Protein lin-7 homolog C	3	3	3	0	0.0795839	-0.0929308	0.841535	0	3	0.276063	97
sp|O43896|KIF1C_HUMAN	O43896	KIF1C_HUMAN	KIF1C	Kinesin-like protein KIF1C	2	1	1	0	0.61332	-0.933306	1.13998	0	1.33333	0.273331	98
sp|O43293|DAPK3_HUMAN	O43293	DAPK3_HUMAN	DAPK3	Death-associated protein kinase 3	1	0	1	0	1.52951	NA	-1.01075	1	0.666667	0.259377	99
sp|Q16204|CCDC6_HUMAN	Q16204	CCDC6_HUMAN	CCDC6	Coiled-coil domain-containing protein 6	1	8	2	0	0.155502	-0.0861821	0.701573	0	3.66667	0.256964	100
sp|Q9UBB4|ATX10_HUMAN	Q9UBB4	ATX10_HUMAN	ATXN10	Ataxin-10	10	12	8	0	0.493629	0.122801	0.136212	0	10	0.250881	101
sp|Q4V328|GRAP1_HUMAN	Q4V328	GRAP1_HUMAN	GRIPAP1	GRIP1-associated protein 1	2	5	3	0	0.538934	0.0246724	0.187926	0	3.33333	0.250511	102
sp|Q49A88|CCD14_HUMAN	Q49A88	CCD14_HUMAN	CCDC14	Coiled-coil domain-containing protein 14	1	NA	1	1	0.888025	NA	-0.416206	1	1	0.235909	103
sp|Q9NZN8|CNOT2_HUMAN	Q9NZN8	CNOT2_HUMAN	CNOT2	CCR4-NOT transcription complex subunit 2	4	2	2	0	0.0803401	0.565538	0.053499	0	2.66667	0.233126	104
sp|Q9Y5X3|SNX5_HUMAN	Q9Y5X3	SNX5_HUMAN	SNX5	Sorting nexin-5	1	NA	1	1	-0.9165	NA	1.37327	1	1	0.228387	105
sp|Q8N3C0|ASCC3_HUMAN	Q8N3C0	ASCC3_HUMAN	ASCC3	Activating signal cointegrator 1 complex subunit 3	5	2	1	0	0.979664	0.616456	-0.922183	0	2.66667	0.224646	106
sp|P68036|UB2L3_HUMAN	P68036	UB2L3_HUMAN	UBE2L3	Ubiquitin-conjugating enzyme E2 L3	2	1	1	0	0.383321	-0.478089	0.760743	0	1.33333	0.221992	107
sp|O43583|DENR_HUMAN	O43583	DENR_HUMAN	DENR	Density-regulated protein	1	3	2	0	0.298013	0.0921502	0.263675	0	2	0.217946	108
sp|Q9Y450|HBS1L_HUMAN	Q9Y450	HBS1L_HUMAN	HBS1L	HBS1-like protein	1	1	0	0	0.374376	0.0597126	NA	1	0.666667	0.217044	109
sp|Q9Y580|RBM7_HUMAN	Q9Y580	RBM7_HUMAN	RBM7	RNA-binding protein 7	2	5	3	0	-0.135286	0.222831	0.554967	0	3.33333	0.214171	110
sp|Q9BZL4|PP12C_HUMAN	Q9BZL4	PP12C_HUMAN	PPP1R12C	Protein phosphatase 1 regulatory subunit 12C	5	6	3	0	0.751647	-0.883783	0.773772	0	4.66667	0.213879	111
sp|Q9UKB1|FBW1B_HUMAN	Q9UKB1	FBW1B_HUMAN	FBXW11	F-box/WD repeat-containing protein 11	2	2	2	0	-0.355089	2.31374	-1.32588	0	2	0.210922	112
sp|O75569|PRKRA_HUMAN	O75569	PRKRA_HUMAN	PRKRA	Interferon-inducible double-stranded RNA-dependent protein kinase activator A	3	4	4	0	0.29821	0.658713	-0.327524	0	3.66667	0.2098	113
sp|Q15814|TBCC_HUMAN	Q15814	TBCC_HUMAN	TBCC	Tubulin-specific chaperone C	0	2	1	0	NA	0.831022	-0.429598	1	1	0.200712	114
sp|Q6P158|DHX57_HUMAN	Q6P158	DHX57_HUMAN	DHX57	Putative ATP-dependent RNA helicase DHX57	1	2	2	0	1.80933	-0.543893	-0.664642	0	1.66667	0.200264	115
sp|O00170|AIP_HUMAN	O00170	AIP_HUMAN	AIP	AH receptor-interacting protein	1	NA	1	1	0.1139	NA	0.286096	1	1	0.199998	116
sp|Q9HC38|GLOD4_HUMAN	Q9HC38	GLOD4_HUMAN	GLOD4	Glyoxalase domain-containing protein 4	4	5	4	0	0.16739	0.158968	0.26326	0	4.33333	0.196539	117
sp|Q08379|GOGA2_HUMAN	Q08379	GOGA2_HUMAN	GOLGA2	Golgin subfamily A member 2	1	1	1	0	0.36725	0.0722659	0.143612	0	1	0.194376	118
sp|Q8TEX9|IPO4_HUMAN	Q8TEX9	IPO4_HUMAN	IPO4	Importin-4	6	8	6	0	0.559134	0.0139692	-0.0175477	0	6.66667	0.185185	119
sp|O60888|CUTA_HUMAN	O60888	CUTA_HUMAN	CUTA	Protein CutA	3	4	3	0	0.243262	0.0732527	0.202774	0	3.33333	0.173096	120
sp|Q9UBK9|UXT_HUMAN	Q9UBK9	UXT_HUMAN	UXT	Protein UXT	NA	1	1	1	NA	0.114128	0.230903	1	1	0.172515	121
sp|O00233|PSMD9_HUMAN	O00233	PSMD9_HUMAN	PSMD9	26S proteasome non-ATPase regulatory subunit 9	1	1	1	0	0.282166	-0.338108	0.570309	0	1	0.171456	122
sp|Q9H2H8|PPIL3_HUMAN	Q9H2H8	PPIL3_HUMAN	PPIL3	Peptidyl-prolyl cis-trans isomerase-like 3	1	2	2	0	-0.170883	0.659389	0.00629806	0	1.66667	0.164935	123
sp|Q504Q3|PAN2_HUMAN	Q504Q3	PAN2_HUMAN	PAN2	PAN2-PAN3 deadenylation complex catalytic subunit PAN2	5	2	5	0	0.379862	0.758595	-0.646074	0	4	0.164128	124
sp|O43929|ORC4_HUMAN	O43929	ORC4_HUMAN	ORC4	Origin recognition complex subunit 4	1	NA	1	1	0.683156	NA	-0.365668	1	1	0.158744	125
sp|P19623|SPEE_HUMAN	P19623	SPEE_HUMAN	SRM	Spermidine synthase	1	3	1	0	-0.086198	0.0638905	0.49728	0	1.66667	0.158324	126
sp|O75122|CLAP2_HUMAN	O75122	CLAP2_HUMAN	CLASP2	CLIP-associating protein 2	1	2	2	0	0.752323	0.00610867	-0.320825	0	1.66667	0.145869	127
sp|P21266|GSTM3_HUMAN	P21266	GSTM3_HUMAN	GSTM3	Glutathione S-transferase Mu 3	3	1	3	0	0.466447	0.3727	-0.402328	0	2.33333	0.145606	128
sp|Q05823|RN5A_HUMAN	Q05823	RN5A_HUMAN	RNASEL	2-5A-dependent ribonuclease	2	1	2	0	0.635485	0.0505394	-0.260501	0	1.66667	0.141841	129
sp|Q00577|PURA_HUMAN	Q00577	PURA_HUMAN	PURA	Transcriptional activator protein Pur-alpha	8	9	7	0	0.361714	0.185468	-0.130377	0	8	0.138935	130
sp|Q13439|GOGA4_HUMAN	Q13439	GOGA4_HUMAN	GOLGA4	Golgin subfamily A member 4	24	46	26	0	0.00510648	0.0679679	0.335544	0	32	0.136206	131
sp|O75175|CNOT3_HUMAN	O75175	CNOT3_HUMAN	CNOT3	CCR4-NOT transcription complex subunit 3	5	6	6	0	-0.235265	0.251349	0.374961	0	5.66667	0.130348	132
sp|Q8IWR0|Z3H7A_HUMAN	Q8IWR0	Z3H7A_HUMAN	ZC3H7A	Zinc finger CCCH domain-containing protein 7A	9	11	12	0	0.601172	0.04876	-0.26385	0	10.6667	0.128694	133
sp|P68402|PA1B2_HUMAN	P68402	PA1B2_HUMAN	PAFAH1B2	Platelet-activating factor acetylhydrolase IB subunit alpha2	1	1	1	0	0.289921	-0.0630029	0.155444	0	1	0.127454	134
sp|Q9NWS0|PIHD1_HUMAN	Q9NWS0	PIHD1_HUMAN	PIH1D1	PIH1 domain-containing protein 1	3	2	2	0	-0.0167991	0.244958	0.137164	0	2.33333	0.121774	135
sp|O75934|SPF27_HUMAN	O75934	SPF27_HUMAN	BCAS2	Pre-mRNA-splicing factor SPF27	3	5	3	0	-0.215774	0.504082	0.0520446	0	3.66667	0.113451	136
sp|Q9UPQ0|LIMC1_HUMAN	Q9UPQ0	LIMC1_HUMAN	LIMCH1	LIM and calponin homology domains-containing protein 1	5	3	7	0	0.653838	-0.624652	0.306457	0	5	0.111881	137
sp|P11766|ADHX_HUMAN	P11766	ADHX_HUMAN	ADH5	Alcohol dehydrogenase class-3	12	24	17	0	0.0407392	0.122478	0.143573	0	17.6667	0.102264	138
sp|Q8IY31|IFT20_HUMAN	Q8IY31	IFT20_HUMAN	IFT20	Intraflagellar transport protein 20 homolog	1	1	NA	1	0.789562	-0.586846	NA	1	1	0.101358	139
tr|H7C3G6|H7C3G6_HUMAN	H7C3G6	H7C3G6_HUMAN	MPRIP	Myosin phosphatase Rho interacting protein (Fragment)	1	NA	1	1	0.251604	NA	-0.0545117	1	1	0.0985459	140
sp|P13489|RINI_HUMAN	P13489	RINI_HUMAN	RNH1	Ribonuclease inhibitor	12	16	10	0	0.368477	-0.155579	0.0749019	0	12.6667	0.0959333	141
sp|Q9BYB4|GNB1L_HUMAN	Q9BYB4	GNB1L_HUMAN	GNB1L	Guanine nucleotide-binding protein subunit beta-like protein 1	1	2	3	0	0.172156	0.386353	-0.28266	0	2	0.0919496	142
sp|Q96A72|MGN2_HUMAN	Q96A72	MGN2_HUMAN	MAGOHB	Protein mago nashi homolog 2	4	5	11	0	0.564035	0.282699	-0.577492	0	6.66667	0.0897474	143
sp|Q9P287|BCCIP_HUMAN	Q9P287	BCCIP_HUMAN	BCCIP	BRCA2 and CDKN1A-interacting protein	2	2	2	0	0.0284337	-0.00933145	0.246016	0	2	0.0883727	144
sp|O15212|PFD6_HUMAN	O15212	PFD6_HUMAN	PFDN6	Prefoldin subunit 6	2	5	5	0	0.130965	-0.208161	0.332414	0	4	0.085073	145
sp|P41240|CSK_HUMAN	P41240	CSK_HUMAN	CSK	Tyrosine-protein kinase CSK	3	6	4	0	0.526308	-0.272994	-0.00406431	0	4.33333	0.083083	146
sp|Q9Y6G9|DC1L1_HUMAN	Q9Y6G9	DC1L1_HUMAN	DYNC1LI1	Cytoplasmic dynein 1 light intermediate chain 1	3	1	2	0	0.105394	-0.267518	0.379663	0	2	0.072513	147
sp|Q9P1F3|ABRAL_HUMAN	Q9P1F3	ABRAL_HUMAN	ABRACL	Costars family protein ABRACL	NA	1	1	1	NA	-0.27493	0.406853	1	1	0.0659614	148
sp|P53041|PPP5_HUMAN	P53041	PPP5_HUMAN	PPP5C	Serine/threonine-protein phosphatase 5	1	4	3	0	-0.102003	0.822317	-0.525442	0	2.66667	0.0649574	149
sp|Q15654|TRIP6_HUMAN	Q15654	TRIP6_HUMAN	TRIP6	Thyroid receptor-interacting protein 6	1	1	1	0	0.442432	-0.810458	0.558709	0	1	0.0635612	150
sp|O60925|PFD1_HUMAN	O60925	PFD1_HUMAN	PFDN1	Prefoldin subunit 1	1	1	1	0	-0.257629	-0.460545	0.902038	0	1	0.0612882	151
sp|Q15746|MYLK_HUMAN	Q15746	MYLK_HUMAN	MYLK	Myosin light chain kinase, smooth muscle	1	1	1	0	0.422278	0.118341	-0.36806	0	1	0.0575196	152
sp|Q9UL18|AGO1_HUMAN	Q9UL18	AGO1_HUMAN	AGO1	Protein argonaute-1	3	2	3	0	0.355362	0.160614	-0.346478	0	2.66667	0.0564992	153
sp|Q9BRP4|PAAF1_HUMAN	Q9BRP4	PAAF1_HUMAN	PAAF1	Proteasomal ATPase-associated factor 1	1	0	1	0	0.0863443	NA	0.0211756	1	0.666667	0.05376	154
sp|P08133|ANXA6_HUMAN	P08133	ANXA6_HUMAN	ANXA6	Annexin A6	0	2	3	0	NA	-0.317744	0.424524	1	1.66667	0.0533898	155
sp|Q53EZ4|CEP55_HUMAN	Q53EZ4	CEP55_HUMAN	CEP55	Centrosomal protein of 55 kDa	5	4	4	0	0.52889	0.0524017	-0.424411	0	4.33333	0.0522934	156
sp|Q9NQC8|IFT46_HUMAN	Q9NQC8	IFT46_HUMAN	IFT46	Intraflagellar transport protein 46 homolog	1	3	2	0	-0.0976218	0.422545	-0.168622	0	2	0.0521005	157
sp|O60333|KIF1B_HUMAN	O60333	KIF1B_HUMAN	KIF1B	Kinesin-like protein KIF1B	1	1	1	0	0.488777	-0.284894	-0.0614636	0	1	0.047473	158
sp|Q9H329|E41LB_HUMAN	Q9H329	E41LB_HUMAN	EPB41L4B	Band 4.1-like protein 4B	1	1	1	0	0.416845	-0.456623	0.17981	0	1	0.0466772	159
sp|P08758|ANXA5_HUMAN	P08758	ANXA5_HUMAN	ANXA5	Annexin A5	1	4	3	0	0.993551	-1.29198	0.42976	0	2.66667	0.0437773	160
sp|O75116|ROCK2_HUMAN	O75116	ROCK2_HUMAN	ROCK2	Rho-associated protein kinase 2	1	1	2	0	0.270475	-0.46925	0.327041	0	1.33333	0.0427553	161
sp|Q9BRP1|PDD2L_HUMAN	Q9BRP1	PDD2L_HUMAN	PDCD2L	Programmed cell death protein 2-like	3	2	2	0	0.638328	-0.22206	-0.290049	0	2.33333	0.042073	162
sp|Q9BVM2|DPCD_HUMAN	Q9BVM2	DPCD_HUMAN	DPCD	Protein DPCD	1	2	1	0	0.427136	-0.350163	0.0469103	0	1.33333	0.0412944	163
sp|O96007|MOC2B_HUMAN	O96007	MOC2B_HUMAN	MOCS2	Molybdopterin synthase catalytic subunit	5	4	5	0	0.244561	0.0271497	-0.1485	0	4.66667	0.0410705	164
sp|Q9NQS1|AVEN_HUMAN	Q9NQS1	AVEN_HUMAN	AVEN	Cell death regulator Aven	2	1	1	0	0.501684	0.18975	-0.571523	0	1.33333	0.0399702	165
sp|Q9BTL3|RAMAC_HUMAN	Q9BTL3	RAMAC_HUMAN	RAMAC	RNA guanine-N7 methyltransferase activating subunit	6	6	8	0	0.221813	-0.10216	-0.00504936	0	6.66667	0.0382011	166
sp|Q96CX2|KCD12_HUMAN	Q96CX2	KCD12_HUMAN	KCTD12	BTB/POZ domain-containing protein KCTD12	4	5	5	0	0.341385	-0.285661	0.021558	0	4.66667	0.0257606	167
sp|Q9UK59|DBR1_HUMAN	Q9UK59	DBR1_HUMAN	DBR1	Lariat debranching enzyme	8	3	8	0	0.498042	-0.346979	-0.0749281	0	6.33333	0.0253782	168
sp|Q9NYZ3|GTSE1_HUMAN	Q9NYZ3	GTSE1_HUMAN	GTSE1	G2 and S phase-expressed protein 1	1	1	NA	1	-0.104746	0.155185	NA	1	1	0.0252199	169
sp|O15145|ARPC3_HUMAN	O15145	ARPC3_HUMAN	ARPC3	Actin-related protein 2/3 complex subunit 3	2	1	3	0	-0.903083	0.294209	0.678121	0	2	0.0230826	170
sp|Q9P2R3|ANFY1_HUMAN	Q9P2R3	ANFY1_HUMAN	ANKFY1	Rabankyrin-5	2	2	4	0	0.356961	0.60729	-0.899459	0	2.66667	0.0215974	171
sp|Q16881|TRXR1_HUMAN	Q16881	TRXR1_HUMAN	TXNRD1	Thioredoxin reductase 1, cytoplasmic	1	0	1	0	-0.485139	NA	0.518649	1	0.666667	0.0167549	172
sp|Q96EK7|F120B_HUMAN	Q96EK7	F120B_HUMAN	FAM120B	Constitutive coactivator of peroxisome proliferator-activated receptor gamma	7	3	8	0	0.692661	-0.369146	-0.329799	0	6	-0.00209482	173
sp|Q9BPZ3|PAIP2_HUMAN	Q9BPZ3	PAIP2_HUMAN	PAIP2	Polyadenylate-binding protein-interacting protein 2	NA	4	3	1	NA	0.0708897	-0.0757789	1	3.5	-0.00244458	174
sp|P67870|CSK2B_HUMAN	P67870	CSK2B_HUMAN	CSNK2B	Casein kinase II subunit beta	2	1	1	0	0.717733	-0.142504	-0.592095	0	1.33333	-0.00562185	175
sp|P07384|CAN1_HUMAN	P07384	CAN1_HUMAN	CAPN1	Calpain-1 catalytic subunit	14	12	10	0	0.250794	-4.72267e-05	-0.282758	0	12	-0.0106704	176
sp|Q9ULV3|CIZ1_HUMAN	Q9ULV3	CIZ1_HUMAN	CIZ1	Cip1-interacting zinc finger protein	1	2	1	0	1.3525	-0.805729	-0.579466	0	1.33333	-0.0108996	177
sp|Q9P2S5|WRP73_HUMAN	Q9P2S5	WRP73_HUMAN	WRAP73	WD repeat-containing protein WRAP73	1	1	1	0	0.397894	-0.289276	-0.146226	0	1	-0.012536	178
sp|Q9UN81|LORF1_HUMAN	Q9UN81	LORF1_HUMAN	L1RE1	LINE-1 retrotransposable element ORF1 protein	7	10	11	0	-0.19125	0.336007	-0.204532	0	9.33333	-0.019925	179
sp|O00139|KIF2A_HUMAN	O00139	KIF2A_HUMAN	KIF2A	Kinesin-like protein KIF2A	9	8	9	0	0.280735	-0.273916	-0.0752649	0	8.66667	-0.0228155	180
sp|Q5T6V5|QNG1_HUMAN	Q5T6V5	QNG1_HUMAN	QNG1	Queuosine 5'-phosphate N-glycosylase/hydrolase	1	0	1	0	0.076731	NA	-0.135775	1	0.666667	-0.0295219	181
sp|Q9BT78|CSN4_HUMAN	Q9BT78	CSN4_HUMAN	COPS4	COP9 signalosome complex subunit 4	3	3	2	0	-0.0517162	-0.215723	0.171309	0	2.66667	-0.0320434	182
sp|Q92615|LAR4B_HUMAN	Q92615	LAR4B_HUMAN	LARP4B	La-related protein 4B	11	19	13	0	0.238786	0.017709	-0.356961	0	14.3333	-0.0334887	183
sp|Q9NPJ8|NXT2_HUMAN	Q9NPJ8	NXT2_HUMAN	NXT2	NTF2-related export protein 2	1	1	1	0	-0.125884	0.156386	-0.133993	0	1	-0.034497	184
sp|P78417|GSTO1_HUMAN	P78417	GSTO1_HUMAN	GSTO1	Glutathione S-transferase omega-1	1	3	1	0	-0.0568114	0.25851	-0.315573	0	1.66667	-0.0379579	185
sp|O60237|MYPT2_HUMAN	O60237	MYPT2_HUMAN	PPP1R12B	Protein phosphatase 1 regulatory subunit 12B	3	2	2	0	-0.0506828	-0.95507	0.880363	0	2.33333	-0.0417966	186
sp|Q9UII4|HERC5_HUMAN	Q9UII4	HERC5_HUMAN	HERC5	E3 ISG15--protein ligase HERC5	1	0	1	0	0.448215	NA	-0.540399	1	0.666667	-0.046092	187
tr|A0A0A0MRX1|A0A0A0MRX1_HUMAN	A0A0A0MRX1	A0A0A0MRX1_HUMAN	ELAVL2	ELAV-like protein	3	5	5	0	-0.0924956	0.641746	-0.687981	0	4.33333	-0.0462435	188
sp|Q6NXE6|ARMC6_HUMAN	Q6NXE6	ARMC6_HUMAN	ARMC6	Armadillo repeat-containing protein 6	7	8	5	0	0.0272639	0.155364	-0.321888	0	6.66667	-0.04642	189
sp|Q99816|TS101_HUMAN	Q99816	TS101_HUMAN	TSG101	Tumor susceptibility gene 101 protein	10	12	11	0	0.169874	-0.0436567	-0.280352	0	11	-0.0513783	190
sp|Q9BZH6|WDR11_HUMAN	Q9BZH6	WDR11_HUMAN	WDR11	WD repeat-containing protein 11	3	0	5	0	0.485261	NA	-0.589684	1	2.66667	-0.0522115	191
sp|Q9UGN5|PARP2_HUMAN	Q9UGN5	PARP2_HUMAN	PARP2	Poly [ADP-ribose] polymerase 2	1	1	1	0	-0.436928	1.28893	-1.00874	0	1	-0.0522474	192
sp|Q9Y608|LRRF2_HUMAN	Q9Y608	LRRF2_HUMAN	LRRFIP2	Leucine-rich repeat flightless-interacting protein 2	8	8	6	0	-0.0922361	-0.247059	0.179153	0	7.33333	-0.0533807	193
sp|Q9H9H4|VP37B_HUMAN	Q9H9H4	VP37B_HUMAN	VPS37B	Vacuolar protein sorting-associated protein 37B	2	6	5	0	-0.254179	0.163892	-0.0709908	0	4.33333	-0.0537592	194
sp|P50995|ANX11_HUMAN	P50995	ANX11_HUMAN	ANXA11	Annexin A11	18	22	19	0	0.0487459	-0.208388	-0.00388482	0	19.6667	-0.054509	195
sp|Q15813|TBCE_HUMAN	Q15813	TBCE_HUMAN	TBCE	Tubulin-specific chaperone E	1	0	1	0	0.0136724	NA	-0.128375	1	0.666667	-0.0573514	196
sp|P42771|CDN2A_HUMAN	P42771	CDN2A_HUMAN	CDKN2A	Cyclin-dependent kinase inhibitor 2A	3	1	1	0	-0.52243	-0.0399838	0.374509	0	1.66667	-0.062635	197
sp|Q9UIV1|CNOT7_HUMAN	Q9UIV1	CNOT7_HUMAN	CNOT7	CCR4-NOT transcription complex subunit 7	1	1	0	0	-2.25933	2.12726	NA	1	0.666667	-0.0660376	198
sp|P52298|NCBP2_HUMAN	P52298	NCBP2_HUMAN	NCBP2	Nuclear cap-binding protein subunit 2	1	2	1	0	-0.470677	0.0795186	0.183736	0	1.33333	-0.0691407	199
sp|Q8IWJ2|GCC2_HUMAN	Q8IWJ2	GCC2_HUMAN	GCC2	GRIP and coiled-coil domain-containing protein 2	31	54	34	0	-0.0963728	-0.0244876	-0.0913664	0	39.6667	-0.0707423	200
sp|Q13546|RIPK1_HUMAN	Q13546	RIPK1_HUMAN	RIPK1	Receptor-interacting serine/threonine-protein kinase 1	2	5	3	0	0.0488263	-0.275157	-0.00548877	0	3.33333	-0.0772732	201
sp|O75347|TBCA_HUMAN	O75347	TBCA_HUMAN	TBCA	Tubulin-specific chaperone A	5	9	7	0	-0.0697876	-0.208079	0.0234157	0	7	-0.0848168	202
sp|O95985|TOP3B_HUMAN	O95985	TOP3B_HUMAN	TOP3B	DNA topoisomerase 3-beta-1	17	15	22	0	0.468799	-0.070896	-0.658175	0	18	-0.0867571	203
sp|O00178|GTPB1_HUMAN	O00178	GTPB1_HUMAN	GTPBP1	GTP-binding protein 1	1	NA	1	1	-0.155253	NA	-0.0213115	1	1	-0.0882823	204
sp|Q9Y3C6|PPIL1_HUMAN	Q9Y3C6	PPIL1_HUMAN	PPIL1	Peptidyl-prolyl cis-trans isomerase-like 1	1	2	1	0	-0.273855	0.415175	-0.412163	0	1.33333	-0.090281	205
sp|O14965|AURKA_HUMAN	O14965	AURKA_HUMAN	AURKA	Aurora kinase A	2	2	0	0	-1.16569	0.983476	NA	1	1.33333	-0.0911082	206
sp|Q8TF05|PP4R1_HUMAN	Q8TF05	PP4R1_HUMAN	PPP4R1	Serine/threonine-protein phosphatase 4 regulatory subunit 1	1	1	1	0	0.386445	-0.709812	0.0381015	0	1	-0.0950885	207
sp|Q13131|AAPK1_HUMAN	Q13131	AAPK1_HUMAN	PRKAA1	5'-AMP-activated protein kinase catalytic subunit alpha-1	7	0	6	0	0.292618	NA	-0.496423	1	4.33333	-0.101903	208
sp|P32929|CGL_HUMAN	P32929	CGL_HUMAN	CTH	Cystathionine gamma-lyase	3	NA	3	1	0.0744769	NA	-0.295599	1	3	-0.110561	209
sp|O43148|MCES_HUMAN	O43148	MCES_HUMAN	RNMT	mRNA cap guanine-N7 methyltransferase	26	31	25	0	-0.0430626	-0.0758045	-0.220866	0	27.3333	-0.113244	210
sp|Q9NR12|PDLI7_HUMAN	Q9NR12	PDLI7_HUMAN	PDLIM7	PDZ and LIM domain protein 7	1	NA	1	1	-1.02641	NA	0.797331	1	1	-0.11454	211
sp|Q8N5W9|RFLB_HUMAN	Q8N5W9	RFLB_HUMAN	RFLNB	Refilin-B	2	0	1	0	-0.101457	NA	-0.127848	1	1	-0.114653	212
sp|Q86X76|NIT1_HUMAN	Q86X76	NIT1_HUMAN	NIT1	Deaminated glutathione amidase	4	3	3	0	-0.549433	0.139983	0.0516703	0	3.33333	-0.11926	213
sp|Q14671|PUM1_HUMAN	Q14671	PUM1_HUMAN	PUM1	Pumilio homolog 1	14	13	17	0	0.219391	0.0410896	-0.619997	0	14.6667	-0.119839	214
sp|Q92830|KAT2A_HUMAN	Q92830	KAT2A_HUMAN	KAT2A	Histone acetyltransferase KAT2A	NA	1	1	1	NA	-0.0949907	-0.146089	1	1	-0.12054	215
sp|Q9NUG6|PDRG1_HUMAN	Q9NUG6	PDRG1_HUMAN	PDRG1	p53 and DNA damage-regulated protein 1	1	4	3	0	-0.508672	0.206152	-0.0621631	0	2.66667	-0.121561	216
sp|Q9NR56|MBNL1_HUMAN	Q9NR56	MBNL1_HUMAN	MBNL1	Muscleblind-like protein 1	2	3	3	0	0.136152	-0.0968009	-0.405662	0	2.66667	-0.122104	217
sp|P31949|S10AB_HUMAN	P31949	S10AB_HUMAN	S100A11	Protein S100-A11	1	6	4	0	-0.54041	0.0536571	0.116572	0	3.66667	-0.123394	218
sp|Q9HCE1|MOV10_HUMAN	Q9HCE1	MOV10_HUMAN	MOV10	Helicase MOV-10	51	54	51	0	0.469145	-0.0776249	-0.762393	0	52	-0.123624	219
sp|P30044|PRDX5_HUMAN	P30044	PRDX5_HUMAN	PRDX5	Peroxiredoxin-5, mitochondrial	1	1	NA	1	-0.0521111	-0.196412	NA	1	1	-0.124261	220
sp|O43791|SPOP_HUMAN	O43791	SPOP_HUMAN	SPOP	Speckle-type POZ protein	6	5	6	0	-0.219573	0.238818	-0.392265	0	5.66667	-0.12434	221
sp|Q5VYK3|ECM29_HUMAN	Q5VYK3	ECM29_HUMAN	ECPAS	Proteasome adapter and scaffold protein ECM29	1	NA	1	1	0.62724	NA	-0.889596	1	1	-0.131178	222
sp|Q9H7E2|TDRD3_HUMAN	Q9H7E2	TDRD3_HUMAN	TDRD3	Tudor domain-containing protein 3	15	17	21	0	0.290183	-0.251547	-0.434473	0	17.6667	-0.131946	223
sp|Q9UKV8|AGO2_HUMAN	Q9UKV8	AGO2_HUMAN	AGO2	Protein argonaute-2	20	15	15	0	0.368224	0.00639323	-0.77496	0	16.6667	-0.133448	224
sp|O43663|PRC1_HUMAN	O43663	PRC1_HUMAN	PRC1	Protein regulator of cytokinesis 1	6	5	3	0	-0.530011	-0.304548	0.432422	0	4.66667	-0.134046	225
sp|Q9UNI6|DUS12_HUMAN	Q9UNI6	DUS12_HUMAN	DUSP12	Dual specificity protein phosphatase 12	6	11	9	0	-0.0657277	-0.0728836	-0.264376	0	8.66667	-0.134329	226
sp|P40222|TXLNA_HUMAN	P40222	TXLNA_HUMAN	TXLNA	Alpha-taxilin	2	1	NA	1	-0.1405	-0.128567	NA	1	1.5	-0.134533	227
sp|Q13572|ITPK1_HUMAN	Q13572	ITPK1_HUMAN	ITPK1	Inositol-tetrakisphosphate 1-kinase	1	3	1	0	0.0506744	0.0140103	-0.472723	0	1.66667	-0.136013	228
sp|Q9P2M7|CING_HUMAN	Q9P2M7	CING_HUMAN	CGN	Cingulin	1	1	0	0	-1.26999	0.997732	NA	1	0.666667	-0.136132	229
sp|A1X283|SPD2B_HUMAN	A1X283	SPD2B_HUMAN	SH3PXD2B	SH3 and PX domain-containing protein 2B	3	4	5	0	0.697212	-0.770098	-0.338851	0	4	-0.137246	230
sp|Q9NUD5|ZCHC3_HUMAN	Q9NUD5	ZCHC3_HUMAN	ZCCHC3	Zinc finger CCHC domain-containing protein 3	15	26	15	0	-0.0539014	0.0573606	-0.419055	0	18.6667	-0.138532	231
sp|O95801|TTC4_HUMAN	O95801	TTC4_HUMAN	TTC4	Tetratricopeptide repeat protein 4	1	1	1	0	-0.506941	0.380231	-0.305273	0	1	-0.143994	232
sp|Q96QK1|VPS35_HUMAN	Q96QK1	VPS35_HUMAN	VPS35	Vacuolar protein sorting-associated protein 35	6	5	8	0	0.0920639	-0.238509	-0.286786	0	6.33333	-0.14441	233
sp|Q96IZ0|PAWR_HUMAN	Q96IZ0	PAWR_HUMAN	PAWR	PRKC apoptosis WT1 regulator protein	15	15	13	0	0.109982	-0.720477	0.175679	0	14.3333	-0.144939	234
sp|Q9BPZ7|SIN1_HUMAN	Q9BPZ7	SIN1_HUMAN	MAPKAP1	Target of rapamycin complex 2 subunit MAPKAP1	1	NA	1	1	0.394334	NA	-0.695932	1	1	-0.150799	235
sp|P15104|GLNA_HUMAN	P15104	GLNA_HUMAN	GLUL	Glutamine synthetase	0	1	1	0	NA	-0.233668	-0.0775613	1	0.666667	-0.155615	236
sp|Q9UHC7|MKRN1_HUMAN	Q9UHC7	MKRN1_HUMAN	MKRN1	E3 ubiquitin-protein ligase makorin-1	2	3	4	0	0.0890233	-0.113028	-0.451082	0	3	-0.158362	237
sp|Q12962|TAF10_HUMAN	Q12962	TAF10_HUMAN	TAF10	Transcription initiation factor TFIID subunit 10	1	1	1	0	0.100765	-0.495117	-0.0830725	0	1	-0.159141	238
sp|Q96ES7|SGF29_HUMAN	Q96ES7	SGF29_HUMAN	SGF29	SAGA-associated factor 29	2	1	2	0	0.207958	-0.150961	-0.54949	0	1.66667	-0.164164	239
tr|F8W0Q9|F8W0Q9_HUMAN	F8W0Q9	F8W0Q9_HUMAN	PPHLN1	Periphilin 1	8	11	9	0	-0.246358	-0.281849	0.00878227	0	9.33333	-0.173142	240
sp|P62993|GRB2_HUMAN	P62993	GRB2_HUMAN	GRB2	Growth factor receptor-bound protein 2	7	8	6	0	-0.120695	-0.249585	-0.149417	0	7	-0.173232	241
sp|Q9P289|STK26_HUMAN	Q9P289	STK26_HUMAN	STK26	Serine/threonine-protein kinase 26	3	3	3	0	-0.067669	-0.650624	0.189538	0	3	-0.176252	242
sp|P15121|ALDR_HUMAN	P15121	ALDR_HUMAN	AKR1B1	Aldo-keto reductase family 1 member B1	2	2	0	0	0.499215	-0.857572	NA	1	1.33333	-0.179178	243
sp|P29558|RBMS1_HUMAN	P29558	RBMS1_HUMAN	RBMS1	RNA-binding motif, single-stranded-interacting protein 1	1	1	1	0	-0.0836555	-0.119422	-0.336769	0	1	-0.179949	244
sp|O75832|PSD10_HUMAN	O75832	PSD10_HUMAN	PSMD10	26S proteasome non-ATPase regulatory subunit 10	3	3	1	0	-0.20749	-0.044764	-0.295264	0	2.33333	-0.182506	245
sp|Q86X55|CARM1_HUMAN	Q86X55	CARM1_HUMAN	CARM1	Histone-arginine methyltransferase CARM1	7	5	6	0	0.175477	-0.238806	-0.512786	0	6	-0.192039	246
sp|Q96LB3|IFT74_HUMAN	Q96LB3	IFT74_HUMAN	IFT74	Intraflagellar transport protein 74 homolog	NA	3	1	1	NA	0.250612	-0.636614	1	2	-0.193001	247
sp|O94832|MYO1D_HUMAN	O94832	MYO1D_HUMAN	MYO1D	Unconventional myosin-Id	6	2	10	0	-0.58908	0.346638	-0.361047	0	6	-0.201163	248
sp|Q9Y3X0|CCDC9_HUMAN	Q9Y3X0	CCDC9_HUMAN	CCDC9	Coiled-coil domain-containing protein 9	2	5	3	0	0.23845	-0.689336	-0.174533	0	3.33333	-0.208473	249
sp|Q9H0E2|TOLIP_HUMAN	Q9H0E2	TOLIP_HUMAN	TOLLIP	Toll-interacting protein	2	2	3	0	-0.472733	-1.06685	0.908004	0	2.33333	-0.210525	250
sp|Q9BVC5|ASHWN_HUMAN	Q9BVC5	ASHWN_HUMAN	C2orf49	Ashwin	9	10	11	0	0.0263476	-0.460095	-0.203872	0	10	-0.21254	251
sp|Q58A45|PAN3_HUMAN	Q58A45	PAN3_HUMAN	PAN3	PAN2-PAN3 deadenylation complex subunit PAN3	4	4	3	0	0.2956	-0.134113	-0.800682	0	3.66667	-0.213065	252
sp|P31939|PUR9_HUMAN	P31939	PUR9_HUMAN	ATIC	Bifunctional purine biosynthesis protein ATIC	1	1	4	0	-0.393481	-0.14572	-0.119582	0	2	-0.219594	253
sp|O15078|CE290_HUMAN	O15078	CE290_HUMAN	CEP290	Centrosomal protein of 290 kDa	1	1	0	0	-0.447703	0.00445021	NA	1	0.666667	-0.221627	254
sp|A1L020|MEX3A_HUMAN	A1L020	MEX3A_HUMAN	MEX3A	RNA-binding protein MEX3A	1	2	3	0	0.137773	-0.604772	-0.231043	0	2	-0.232681	255
sp|O60678|ANM3_HUMAN	O60678	ANM3_HUMAN	PRMT3	Protein arginine N-methyltransferase 3	3	2	2	0	0.601124	-0.30957	-1.00169	0	2.33333	-0.236713	256
sp|Q92747|ARC1A_HUMAN	Q92747	ARC1A_HUMAN	ARPC1A	Actin-related protein 2/3 complex subunit 1A	6	0	3	0	-0.471384	NA	-0.0136086	1	3	-0.242496	257
sp|Q0VDF9|HSP7E_HUMAN	Q0VDF9	HSP7E_HUMAN	HSPA14	Heat shock 70 kDa protein 14	1	0	1	0	0.42669	NA	-0.912668	1	0.666667	-0.242989	258
sp|P19525|E2AK2_HUMAN	P19525	E2AK2_HUMAN	EIF2AK2	Interferon-induced, double-stranded RNA-activated protein kinase	1	2	1	0	0.0163826	-0.430186	-0.325387	0	1.33333	-0.246397	259
sp|P04183|KITH_HUMAN	P04183	KITH_HUMAN	TK1	Thymidine kinase, cytosolic	1	2	NA	1	-0.295413	-0.210234	NA	1	1.5	-0.252823	260
sp|Q5EBL8|PDZ11_HUMAN	Q5EBL8	PDZ11_HUMAN	PDZD11	PDZ domain-containing protein 11	2	1	2	0	-0.962142	-0.711586	0.914798	0	1.66667	-0.252976	261
sp|P07203|GPX1_HUMAN	P07203	GPX1_HUMAN	GPX1	Glutathione peroxidase 1	1	1	1	0	0.224721	-0.290265	-0.698009	0	1	-0.254518	262
sp|Q13045|FLII_HUMAN	Q13045	FLII_HUMAN	FLII	Protein flightless-1 homolog	19	25	25	0	-0.17981	-0.211127	-0.377992	0	23	-0.25631	263
sp|Q9H9A5|CNO10_HUMAN	Q9H9A5	CNO10_HUMAN	CNOT10	CCR4-NOT transcription complex subunit 10	2	1	2	0	0.765514	-0.00617452	-1.54886	0	1.66667	-0.263174	264
sp|Q8N3R9|PALS1_HUMAN	Q8N3R9	PALS1_HUMAN	PALS1	Protein PALS1	6	0	2	0	-0.273756	NA	-0.262448	1	2.66667	-0.268102	265
sp|P54619|AAKG1_HUMAN	P54619	AAKG1_HUMAN	PRKAG1	5'-AMP-activated protein kinase subunit gamma-1	5	4	4	0	0.0791001	-0.203172	-0.692064	0	4.33333	-0.272045	266
tr|A0A5F9ZH79|A0A5F9ZH79_HUMAN	A0A5F9ZH79	A0A5F9ZH79_HUMAN	ASCC1	Activating signal cointegrator 1 complex subunit 1	4	1	2	0	0.420108	0.466312	-1.71154	0	2.33333	-0.275041	267
sp|Q8IZ69|TRM2A_HUMAN	Q8IZ69	TRM2A_HUMAN	TRMT2A	tRNA (uracil-5-)-methyltransferase homolog A	NA	1	1	1	NA	0.0853554	-0.638623	1	1	-0.276634	268
sp|Q92905|CSN5_HUMAN	Q92905	CSN5_HUMAN	COPS5	COP9 signalosome complex subunit 5	1	1	1	0	-0.152393	-0.195189	-0.491021	0	1	-0.279534	269
sp|Q9NYU2|UGGG1_HUMAN	Q9NYU2	UGGG1_HUMAN	UGGT1	UDP-glucose:glycoprotein glucosyltransferase 1	1	1	NA	1	-0.355442	-0.212983	NA	1	1	-0.284212	270
sp|Q96F86|EDC3_HUMAN	Q96F86	EDC3_HUMAN	EDC3	Enhancer of mRNA-decapping protein 3	3	5	5	0	0.214638	-0.175232	-0.893018	0	4.33333	-0.284537	271
sp|O14579|COPE_HUMAN	O14579	COPE_HUMAN	COPE	Coatomer subunit epsilon	12	7	4	0	-0.193095	-0.0352996	-0.626434	0	7.66667	-0.284943	272
sp|Q96N67|DOCK7_HUMAN	Q96N67	DOCK7_HUMAN	DOCK7	Dedicator of cytokinesis protein 7	31	9	14	0	-0.419807	-0.30242	-0.140339	0	18	-0.287522	273
sp|P28290|ITPI2_HUMAN	P28290	ITPI2_HUMAN	ITPRID2	Protein ITPRID2	13	5	5	0	-0.233221	-0.871702	0.229962	0	7.66667	-0.291654	274
sp|Q15437|SC23B_HUMAN	Q15437	SC23B_HUMAN	SEC23B	Protein transport protein Sec23B	1	2	5	0	-0.367662	0.070859	-0.579963	0	2.66667	-0.292255	275
sp|Q12986|NFX1_HUMAN	Q12986	NFX1_HUMAN	NFX1	Transcriptional repressor NF-X1	2	6	3	0	0.289314	-0.487998	-0.678135	0	3.66667	-0.292273	276
sp|Q9H9T3|ELP3_HUMAN	Q9H9T3	ELP3_HUMAN	ELP3	Elongator complex protein 3	1	1	3	0	0.464255	-0.658349	-0.684143	0	1.66667	-0.292746	277
sp|Q92600|CNOT9_HUMAN	Q92600	CNOT9_HUMAN	CNOT9	CCR4-NOT transcription complex subunit 9	4	2	5	0	-0.121356	0.189083	-0.957727	0	3.66667	-0.296667	278
sp|Q8TD19|NEK9_HUMAN	Q8TD19	NEK9_HUMAN	NEK9	Serine/threonine-protein kinase Nek9	1	2	1	0	0.139687	-0.934382	-0.0990457	0	1.33333	-0.297914	279
sp|Q9H000|MKRN2_HUMAN	Q9H000	MKRN2_HUMAN	MKRN2	E3 ubiquitin-protein ligase makorin-2	3	0	2	0	0.093331	NA	-0.691117	1	1.66667	-0.298893	280
sp|Q9UBI9|HDC_HUMAN	Q9UBI9	HDC_HUMAN	HECA	Headcase protein homolog	2	2	2	0	0.252418	-0.323849	-0.845309	0	2	-0.30558	281
sp|Q17RY0|CPEB4_HUMAN	Q17RY0	CPEB4_HUMAN	CPEB4	Cytoplasmic polyadenylation element-binding protein 4	2	2	4	0	0.536252	-0.396381	-1.05699	0	2.66667	-0.305706	282
sp|Q96SB3|NEB2_HUMAN	Q96SB3	NEB2_HUMAN	PPP1R9B	Neurabin-2	9	8	6	0	-0.770459	-0.522525	0.37035	0	7.66667	-0.307545	283
sp|P35237|SPB6_HUMAN	P35237	SPB6_HUMAN	SERPINB6	Serpin B6	2	5	4	0	-0.193882	-0.397478	-0.341718	0	3.66667	-0.311026	284
sp|P27361|MK03_HUMAN	P27361	MK03_HUMAN	MAPK3	Mitogen-activated protein kinase 3	1	1	1	0	0.900674	-1.66397	-0.170005	0	1	-0.311099	285
sp|P28482|MK01_HUMAN	P28482	MK01_HUMAN	MAPK1	Mitogen-activated protein kinase 1	4	4	4	0	-0.0117976	-0.728731	-0.200624	0	4	-0.313717	286
sp|Q9BSD7|NTPCR_HUMAN	Q9BSD7	NTPCR_HUMAN	NTPCR	Cancer-related nucleoside-triphosphatase	2	0	2	0	0.0016278	NA	-0.634712	1	1.33333	-0.316542	287
sp|Q8NEZ2|VP37A_HUMAN	Q8NEZ2	VP37A_HUMAN	VPS37A	Vacuolar protein sorting-associated protein 37A	1	1	NA	1	-0.274935	-0.360513	NA	1	1	-0.317724	288
sp|Q9ULC4|MCTS1_HUMAN	Q9ULC4	MCTS1_HUMAN	MCTS1	Malignant T-cell-amplified sequence 1	1	2	1	0	-0.0417876	-1.31453	0.39782	0	1.33333	-0.3195	289
sp|Q5VWN6|TASO2_HUMAN	Q5VWN6	TASO2_HUMAN	TASOR2	Protein TASOR 2	1	3	2	0	-0.271464	-0.562436	-0.12698	0	2	-0.320293	290
sp|Q14573|ITPR3_HUMAN	Q14573	ITPR3_HUMAN	ITPR3	Inositol 1,4,5-trisphosphate receptor type 3	41	21	26	0	-0.155878	-0.790727	-0.016598	0	29.3333	-0.321068	291
tr|A0A499FIZ0|A0A499FIZ0_HUMAN	A0A499FIZ0	A0A499FIZ0_HUMAN	WDR26	WD repeat domain 26	6	4	3	0	0.00475107	-0.14909	-0.822481	0	4.33333	-0.322273	292
sp|Q96MX6|DAA10_HUMAN	Q96MX6	DAA10_HUMAN	DNAAF10	Dynein axonemal assembly factor 10	3	5	3	0	0.19101	-0.728128	-0.432057	0	3.66667	-0.323058	293
sp|P42694|HELZ_HUMAN	P42694	HELZ_HUMAN	HELZ	Probable helicase with zinc finger domain	10	14	8	0	-0.0422447	-0.267047	-0.670687	0	10.6667	-0.326659	294
sp|Q99549|MPP8_HUMAN	Q99549	MPP8_HUMAN	MPHOSPH8	M-phase phosphoprotein 8	5	3	5	0	-0.285216	-0.13548	-0.565476	0	4.33333	-0.328724	295
sp|Q9BYK8|HELZ2_HUMAN	Q9BYK8	HELZ2_HUMAN	HELZ2	Helicase with zinc finger domain 2	2	3	8	0	0.106477	-0.333797	-0.764507	0	4.33333	-0.330609	296
sp|Q13464|ROCK1_HUMAN	Q13464	ROCK1_HUMAN	ROCK1	Rho-associated protein kinase 1	1	7	8	0	-0.205784	-0.327598	-0.46194	0	5.33333	-0.331774	297
sp|Q9NQX4|MYO5C_HUMAN	Q9NQX4	MYO5C_HUMAN	MYO5C	Unconventional myosin-Vc	8	3	6	0	-0.614008	-1.60918	1.22781	0	5.66667	-0.33179	298
sp|P49674|KC1E_HUMAN	P49674	KC1E_HUMAN	CSNK1E	Casein kinase I isoform epsilon	2	0	2	0	0.367883	NA	-1.03242	1	1.33333	-0.332269	299
sp|P48729|KC1A_HUMAN	P48729	KC1A_HUMAN	CSNK1A1	Casein kinase I isoform alpha	1	3	2	0	-0.0600797	-0.483666	-0.453517	0	2	-0.332421	300
sp|Q06210|GFPT1_HUMAN	Q06210	GFPT1_HUMAN	GFPT1	Glutamine--fructose-6-phosphate aminotransferase [isomerizing] 1	18	16	19	0	0.00011897	-0.437831	-0.579161	0	17.6667	-0.338957	301
sp|Q9Y5X1|SNX9_HUMAN	Q9Y5X1	SNX9_HUMAN	SNX9	Sorting nexin-9	4	1	3	0	0.250497	-0.775622	-0.495868	0	2.66667	-0.340331	302
sp|Q8N5C6|SRBD1_HUMAN	Q8N5C6	SRBD1_HUMAN	SRBD1	S1 RNA-binding domain-containing protein 1	2	2	2	0	0.400271	-0.0986797	-1.3256	0	2	-0.341335	303
sp|P57678|GEMI4_HUMAN	P57678	GEMI4_HUMAN	GEMIN4	Gem-associated protein 4	2	1	1	0	-0.619239	0.0667808	-0.477918	0	1.33333	-0.343459	304
sp|P62633|CNBP_HUMAN	P62633	CNBP_HUMAN	CNBP	CCHC-type zinc finger nucleic acid binding protein	2	3	3	0	-0.673924	-0.205186	-0.159522	0	2.66667	-0.346211	305
sp|Q4VCS5|AMOT_HUMAN	Q4VCS5	AMOT_HUMAN	AMOT	Angiomotin	23	16	17	0	-0.233673	-0.75	-0.0668517	0	18.6667	-0.350175	306
sp|P78332|RBM6_HUMAN	P78332	RBM6_HUMAN	RBM6	RNA-binding protein 6	0	3	1	0	NA	0.654833	-1.35706	1	1.33333	-0.351115	307
sp|P49023|PAXI_HUMAN	P49023	PAXI_HUMAN	PXN	Paxillin	1	2	1	0	-0.127578	-0.32137	-0.60853	0	1.33333	-0.352493	308
sp|O75695|XRP2_HUMAN	O75695	XRP2_HUMAN	RP2	Protein XRP2	1	2	NA	1	-0.193448	-0.527979	NA	1	1.5	-0.360714	309
sp|Q9BX40|LS14B_HUMAN	Q9BX40	LS14B_HUMAN	LSM14B	Protein LSM14 homolog B	1	NA	1	1	0.33337	NA	-1.0571	1	1	-0.361863	310
sp|Q86XZ4|SPAS2_HUMAN	Q86XZ4	SPAS2_HUMAN	SPATS2	Spermatogenesis-associated serine-rich protein 2	2	5	4	0	-0.125601	-0.50546	-0.458425	0	3.66667	-0.363162	311
sp|Q86UC2|RSPH3_HUMAN	Q86UC2	RSPH3_HUMAN	RSPH3	Radial spoke head protein 3 homolog	1	1	NA	1	-0.0340591	-0.693824	NA	1	1	-0.363942	312
sp|Q9C0B1|FTO_HUMAN	Q9C0B1	FTO_HUMAN	FTO	Alpha-ketoglutarate-dependent dioxygenase FTO	1	1	1	0	-0.226531	-0.146112	-0.726312	0	1	-0.366319	313
sp|Q6P6C2|ALKB5_HUMAN	Q6P6C2	ALKB5_HUMAN	ALKBH5	RNA demethylase ALKBH5	2	1	2	0	0.304951	-0.0202199	-1.39655	0	1.66667	-0.370607	314
sp|Q9NRN7|ADPPT_HUMAN	Q9NRN7	ADPPT_HUMAN	AASDHPPT	L-aminoadipate-semialdehyde dehydrogenase-phosphopantetheinyl transferase	2	3	1	0	-0.194455	-0.166111	-0.761628	0	2	-0.374065	315
sp|Q13555|KCC2G_HUMAN	Q13555	KCC2G_HUMAN	CAMK2G	Calcium/calmodulin-dependent protein kinase type II subunit gamma	2	0	2	0	-0.444878	NA	-0.304952	1	1.33333	-0.374915	316
sp|O60573|IF4E2_HUMAN	O60573	IF4E2_HUMAN	EIF4E2	Eukaryotic translation initiation factor 4E type 2	2	2	2	0	-0.0973394	0.106664	-1.13439	0	2	-0.375021	317
sp|Q8TB72|PUM2_HUMAN	Q8TB72	PUM2_HUMAN	PUM2	Pumilio homolog 2	2	1	0	0	-0.445784	-0.307168	NA	1	1	-0.376476	318
sp|Q9NZ09|UBAP1_HUMAN	Q9NZ09	UBAP1_HUMAN	UBAP1	Ubiquitin-associated protein 1	2	2	NA	1	0.246632	-1.0031	NA	1	2	-0.378237	319
sp|Q96EX3|DC2I2_HUMAN	Q96EX3	DC2I2_HUMAN	DYNC2I2	Cytoplasmic dynein 2 intermediate chain 2	1	1	1	0	0.162883	-0.544757	-0.754786	0	1	-0.378886	320
sp|O15084|ANR28_HUMAN	O15084	ANR28_HUMAN	ANKRD28	Serine/threonine-protein phosphatase 6 regulatory ankyrin repeat subunit A	1	1	0	0	-0.202539	-0.55608	NA	1	0.666667	-0.37931	321
sp|Q8NFW8|NEUA_HUMAN	Q8NFW8	NEUA_HUMAN	CMAS	N-acylneuraminate cytidylyltransferase	6	3	3	0	-0.56546	-0.324394	-0.257691	0	4	-0.382515	322
sp|Q9H1I8|ASCC2_HUMAN	Q9H1I8	ASCC2_HUMAN	ASCC2	Activating signal cointegrator 1 complex subunit 2	0	1	3	0	NA	-0.328634	-0.438832	1	1.33333	-0.383733	323
sp|Q8IZQ5|SELH_HUMAN	Q8IZQ5	SELH_HUMAN	SELENOH	Selenoprotein H	1	3	NA	1	-0.528	-0.244721	NA	1	2	-0.38636	324
sp|Q9UFF9|CNOT8_HUMAN	Q9UFF9	CNOT8_HUMAN	CNOT8	CCR4-NOT transcription complex subunit 8	1	NA	1	1	0.0589034	NA	-0.835732	1	1	-0.388414	325
sp|Q9BPX5|ARP5L_HUMAN	Q9BPX5	ARP5L_HUMAN	ARPC5L	Actin-related protein 2/3 complex subunit 5-like protein	1	0	1	0	-0.813916	NA	0.0352471	1	0.666667	-0.389334	326
sp|Q9Y5V3|MAGD1_HUMAN	Q9Y5V3	MAGD1_HUMAN	MAGED1	Melanoma-associated antigen D1	2	2	1	0	-0.510191	-0.114492	-0.557356	0	1.66667	-0.394013	327
sp|O60784|TOM1_HUMAN	O60784	TOM1_HUMAN	TOM1	Target of Myb1 membrane trafficking protein	3	2	3	0	-0.591005	-0.413366	-0.22807	0	2.66667	-0.410814	328
sp|Q8IZ83|A16A1_HUMAN	Q8IZ83	A16A1_HUMAN	ALDH16A1	Aldehyde dehydrogenase family 16 member A1	2	1	4	0	-0.439804	0.318087	-1.11537	0	2.33333	-0.412364	329
sp|Q8IUH3|RBM45_HUMAN	Q8IUH3	RBM45_HUMAN	RBM45	RNA-binding protein 45	1	1	1	0	0.518287	-1.03092	-0.739976	0	1	-0.417536	330
sp|Q8IUX4|ABC3F_HUMAN	Q8IUX4	ABC3F_HUMAN	APOBEC3F	DNA dC->dU-editing enzyme APOBEC-3F	3	5	2	0	-0.0362898	-0.559659	-0.664622	0	3.33333	-0.42019	331
sp|Q86XK2|FBX11_HUMAN	Q86XK2	FBX11_HUMAN	FBXO11	F-box only protein 11	7	11	6	0	-1.06406	0.222594	-0.4207	0	8	-0.420722	332
sp|O95429|BAG4_HUMAN	O95429	BAG4_HUMAN	BAG4	BAG family molecular chaperone regulator 4	7	12	9	0	-0.470421	-0.309335	-0.487766	0	9.33333	-0.422507	333
sp|Q9Y4C2|TCAF1_HUMAN	Q9Y4C2	TCAF1_HUMAN	TCAF1	TRPM8 channel-associated factor 1	2	3	1	0	0.438029	-0.287309	-1.42079	0	2	-0.423357	334
sp|Q9BZF9|UACA_HUMAN	Q9BZF9	UACA_HUMAN	UACA	Uveal autoantigen with coiled-coil domains and ankyrin repeats	33	21	27	0	-0.251566	-0.919567	-0.0996512	0	27	-0.423595	335
sp|Q8WWI1|LMO7_HUMAN	Q8WWI1	LMO7_HUMAN	LMO7	LIM domain only protein 7	27	12	15	0	-0.499494	-0.946931	0.138093	0	18	-0.436111	336
sp|Q96P11|NSUN5_HUMAN	Q96P11	NSUN5_HUMAN	NSUN5	28S rRNA (cytosine-C(5))-methyltransferase	2	1	2	0	-0.591633	-0.0399763	-0.689013	0	1.66667	-0.440208	337
tr|A0A494BZV2|A0A494BZV2_HUMAN	A0A494BZV2	A0A494BZV2_HUMAN	MPRIP	Myosin phosphatase Rho interacting protein	108	74	82	0	-0.235613	-1.01396	-0.0980461	0	88	-0.449208	338
sp|Q15542|TAF5_HUMAN	Q15542	TAF5_HUMAN	TAF5	Transcription initiation factor TFIID subunit 5	1	1	1	0	-0.476418	-0.544747	-0.327151	0	1	-0.449439	339
sp|Q13557|KCC2D_HUMAN	Q13557	KCC2D_HUMAN	CAMK2D	Calcium/calmodulin-dependent protein kinase type II subunit delta	6	6	6	0	-0.409113	-0.725433	-0.217232	0	6	-0.450593	340
sp|Q9Y6W5|WASF2_HUMAN	Q9Y6W5	WASF2_HUMAN	WASF2	Actin-binding protein WASF2	1	NA	1	1	1.96487	NA	-2.87291	1	1	-0.454018	341
sp|Q9BZL6|KPCD2_HUMAN	Q9BZL6	KPCD2_HUMAN	PRKD2	Serine/threonine-protein kinase D2	1	NA	1	1	0.979253	NA	-1.8947	1	1	-0.457721	342
sp|Q96MG7|NSE3_HUMAN	Q96MG7	NSE3_HUMAN	NSMCE3	Non-structural maintenance of chromosomes element 3 homolog	1	1	NA	1	0.0125042	-0.93209	NA	1	1	-0.459793	343
sp|Q8WVV9|HNRLL_HUMAN	Q8WVV9	HNRLL_HUMAN	HNRNPLL	Heterogeneous nuclear ribonucleoprotein L-like	1	1	1	0	-0.724982	-0.35191	-0.30406	0	1	-0.460318	344
sp|Q9H2D6|TARA_HUMAN	Q9H2D6	TARA_HUMAN	TRIOBP	TRIO and F-actin-binding protein	10	7	3	0	-0.41047	-1.16075	0.175411	0	6.66667	-0.465268	345
sp|Q14678|KANK1_HUMAN	Q14678	KANK1_HUMAN	KANK1	KN motif and ankyrin repeat domain-containing protein 1	2	2	1	0	0.270135	-1.73502	0.0533752	0	1.66667	-0.470504	346
sp|Q5VUJ6|LRCH2_HUMAN	Q5VUJ6	LRCH2_HUMAN	LRCH2	Leucine-rich repeat and calponin homology domain-containing protein 2	4	2	4	0	-0.24016	-0.749712	-0.437608	0	3.33333	-0.475827	347
sp|O75794|CD123_HUMAN	O75794	CD123_HUMAN	CDC123	Cell division cycle protein 123 homolog	1	1	1	0	-0.93852	-0.591077	0.0656534	0	1	-0.487981	348
sp|Q15032|R3HD1_HUMAN	Q15032	R3HD1_HUMAN	R3HDM1	R3H domain-containing protein 1	0	1	1	0	NA	-0.325011	-0.659928	1	0.666667	-0.492469	349
sp|O14802|RPC1_HUMAN	O14802	RPC1_HUMAN	POLR3A	DNA-directed RNA polymerase III subunit RPC1	1	1	2	0	-0.136582	-0.794204	-0.557129	0	1.33333	-0.495971	350
sp|Q69YQ0|CYTSA_HUMAN	Q69YQ0	CYTSA_HUMAN	SPECC1L	Cytospin-A	46	13	34	0	-0.70384	-0.786777	-0.0488382	0	31	-0.513152	351
sp|Q13616|CUL1_HUMAN	Q13616	CUL1_HUMAN	CUL1	Cullin-1	3	1	7	0	-0.760525	0.678481	-1.4753	0	3.66667	-0.519115	352
sp|P23193|TCEA1_HUMAN	P23193	TCEA1_HUMAN	TCEA1	Transcription elongation factor A protein 1	2	2	0	0	-1.39305	0.34023	NA	1	1.33333	-0.526412	353
tr|A0A994J5E0|A0A994J5E0_HUMAN	A0A994J5E0	A0A994J5E0_HUMAN	PDE4DIP	Phosphodiesterase 4D interacting protein	1	1	1	0	0.139795	-1.56517	-0.156652	0	1	-0.527341	354
sp|Q96EY5|MB12A_HUMAN	Q96EY5	MB12A_HUMAN	MVB12A	Multivesicular body subunit 12A	1	3	2	0	-1.36919	-0.612516	0.391731	0	2	-0.52999	355
sp|P10155|RO60_HUMAN	P10155	RO60_HUMAN	RO60	RNA-binding protein RO60	1	1	1	0	-0.0528281	-0.625568	-0.912616	0	1	-0.530337	356
sp|Q8WYQ5|DGCR8_HUMAN	Q8WYQ5	DGCR8_HUMAN	DGCR8	Microprocessor complex subunit DGCR8	1	1	1	0	-1.5742	0.123332	-0.150988	0	1	-0.533952	357
sp|P19784|CSK22_HUMAN	P19784	CSK22_HUMAN	CSNK2A2	Casein kinase II subunit alpha'	2	1	2	0	-0.0463125	-0.152909	-1.41557	0	1.66667	-0.538264	358
sp|Q9ULJ8|NEB1_HUMAN	Q9ULJ8	NEB1_HUMAN	PPP1R9A	Neurabin-1	2	0	1	0	-1.92322	NA	0.839105	1	1	-0.542058	359
sp|Q01804|OTUD4_HUMAN	Q01804	OTUD4_HUMAN	OTUD4	OTU domain-containing protein 4	0	2	1	0	NA	-0.560288	-0.527027	1	1	-0.543657	360
sp|Q96GD4|AURKB_HUMAN	Q96GD4	AURKB_HUMAN	AURKB	Aurora kinase B	1	0	1	0	-0.786098	NA	-0.309954	1	0.666667	-0.548026	361
sp|Q96F44|TRI11_HUMAN	Q96F44	TRI11_HUMAN	TRIM11	E3 ubiquitin-protein ligase TRIM11	1	0	3	0	-0.306013	NA	-0.791358	1	1.33333	-0.548685	362
sp|Q9BPU6|DPYL5_HUMAN	Q9BPU6	DPYL5_HUMAN	DPYSL5	Dihydropyrimidinase-related protein 5	NA	1	1	1	NA	-0.436488	-0.663434	1	1	-0.549961	363
sp|P30626|SORCN_HUMAN	P30626	SORCN_HUMAN	SRI	Sorcin	1	3	3	0	-0.461745	-0.59353	-0.598559	0	2.33333	-0.551278	364
sp|P15374|UCHL3_HUMAN	P15374	UCHL3_HUMAN	UCHL3	Ubiquitin carboxyl-terminal hydrolase isozyme L3	1	NA	1	1	-0.465697	NA	-0.642869	1	1	-0.554283	365
sp|Q9H2U1|DHX36_HUMAN	Q9H2U1	DHX36_HUMAN	DHX36	ATP-dependent DNA/RNA helicase DHX36	17	12	17	0	-0.165858	-0.41946	-1.08063	0	15.3333	-0.555314	366
sp|Q00796|DHSO_HUMAN	Q00796	DHSO_HUMAN	SORD	Sorbitol dehydrogenase	1	NA	1	1	-0.255461	NA	-0.885747	1	1	-0.570604	367
sp|P41567|EIF1_HUMAN	P41567	EIF1_HUMAN	EIF1	Eukaryotic translation initiation factor 1	1	1	1	0	-2.82747	0.639514	0.435148	0	1	-0.584271	368
sp|P30566|PUR8_HUMAN	P30566	PUR8_HUMAN	ADSL	Adenylosuccinate lyase	2	1	2	0	0.0133385	-1.46112	-0.30554	0	1.66667	-0.58444	369
sp|P20073|ANXA7_HUMAN	P20073	ANXA7_HUMAN	ANXA7	Annexin A7	11	9	8	0	-0.869178	-0.588844	-0.317354	0	9.33333	-0.591792	370
sp|Q96HR8|NAF1_HUMAN	Q96HR8	NAF1_HUMAN	NAF1	H/ACA ribonucleoprotein complex non-core subunit NAF1	1	1	1	0	-0.89232	-0.424931	-0.46966	0	1	-0.595637	371
sp|P14373|TRI27_HUMAN	P14373	TRI27_HUMAN	TRIM27	Zinc finger protein RFP	1	2	0	0	-0.171503	-1.03033	NA	1	1	-0.600916	372
sp|Q8WWX9|SELM_HUMAN	Q8WWX9	SELM_HUMAN	SELENOM	Selenoprotein M	1	3	1	0	-0.845459	-0.617123	-0.351883	0	1.66667	-0.604822	373
sp|O43776|SYNC_HUMAN	O43776	SYNC_HUMAN	NARS1	Asparagine--tRNA ligase, cytoplasmic	1	1	2	0	-0.386194	-0.652636	-0.779855	0	1.33333	-0.606229	374
sp|Q6WCQ1|MPRIP_HUMAN	Q6WCQ1	MPRIP_HUMAN	MPRIP	Myosin phosphatase Rho-interacting protein	2	1	1	0	-0.241251	-1.22577	-0.365837	0	1.33333	-0.610954	375
sp|O94763|RMP_HUMAN	O94763	RMP_HUMAN	URI1	Unconventional prefoldin RPB5 interactor 1	2	10	5	0	-0.961781	-0.0264796	-0.858477	0	5.66667	-0.615579	376
sp|Q8N4J0|CARME_HUMAN	Q8N4J0	CARME_HUMAN	CARNMT1	Carnosine N-methyltransferase	1	NA	1	1	-0.518818	NA	-0.722022	1	1	-0.62042	377
sp|P49366|DHYS_HUMAN	P49366	DHYS_HUMAN	DHPS	Deoxyhypusine synthase	1	0	1	0	-0.329207	NA	-0.922219	1	0.666667	-0.625713	378
sp|P24666|PPAC_HUMAN	P24666	PPAC_HUMAN	ACP1	Low molecular weight phosphotyrosine protein phosphatase	4	6	3	0	-0.978009	0.0184648	-0.920946	0	4.33333	-0.62683	379
sp|Q03001|DYST_HUMAN	Q03001	DYST_HUMAN	DST	Dystonin	12	3	5	0	-0.147612	-2.12382	0.381895	0	6.66667	-0.629845	380
sp|Q9NP79|VTA1_HUMAN	Q9NP79	VTA1_HUMAN	VTA1	Vacuolar protein sorting-associated protein VTA1 homolog	1	3	1	0	0.356981	-2.58631	0.294705	0	1.66667	-0.644874	381
sp|Q8NI35|INADL_HUMAN	Q8NI35	INADL_HUMAN	PATJ	InaD-like protein	3	1	0	0	-0.267551	-1.03466	NA	1	1.33333	-0.651108	382
sp|Q14571|ITPR2_HUMAN	Q14571	ITPR2_HUMAN	ITPR2	Inositol 1,4,5-trisphosphate receptor type 2	17	3	5	0	-0.547078	-1.0699	-0.339802	0	8.33333	-0.65226	383
sp|Q13404|UB2V1_HUMAN	Q13404	UB2V1_HUMAN	UBE2V1	Ubiquitin-conjugating enzyme E2 variant 1	1	2	1	0	-0.256406	-0.619365	-1.09818	0	1.33333	-0.657985	384
sp|Q9BXS5|AP1M1_HUMAN	Q9BXS5	AP1M1_HUMAN	AP1M1	AP-1 complex subunit mu-1	2	0	1	0	-0.664227	NA	-0.65287	1	1	-0.658549	385
sp|P17931|LEG3_HUMAN	P17931	LEG3_HUMAN	LGALS3	Galectin-3	2	1	0	0	-0.201885	-1.13655	NA	1	1	-0.669215	386
sp|Q9BRX2|PELO_HUMAN	Q9BRX2	PELO_HUMAN	PELO	Protein pelota homolog	2	2	1	0	-0.265738	-0.857287	-0.900541	0	1.66667	-0.674522	387
sp|Q9Y6Y8|S23IP_HUMAN	Q9Y6Y8	S23IP_HUMAN	SEC23IP	SEC23-interacting protein	2	NA	3	1	-0.606044	NA	-0.753569	1	2.5	-0.679806	388
sp|Q5VT25|MRCKA_HUMAN	Q5VT25	MRCKA_HUMAN	CDC42BPA	Serine/threonine-protein kinase MRCK alpha	2	0	2	0	-0.474619	NA	-0.886015	1	1.33333	-0.680317	389
sp|Q9Y296|TPPC4_HUMAN	Q9Y296	TPPC4_HUMAN	TRAPPC4	Trafficking protein particle complex subunit 4	NA	1	1	1	NA	-0.581206	-0.781629	1	1	-0.681418	390
sp|Q8N5L8|RP25L_HUMAN	Q8N5L8	RP25L_HUMAN	RPP25L	Ribonuclease P protein subunit p25-like protein	1	1	1	0	0.569576	-1.30347	-1.34097	0	1	-0.691624	391
sp|P36969|GPX4_HUMAN	P36969	GPX4_HUMAN	GPX4	Phospholipid hydroperoxide glutathione peroxidase	1	2	2	0	-0.698439	-0.575683	-0.817286	0	1.66667	-0.697136	392
sp|P40937|RFC5_HUMAN	P40937	RFC5_HUMAN	RFC5	Replication factor C subunit 5	1	1	NA	1	-0.070838	-1.34255	NA	1	1	-0.706694	393
sp|Q9BZF1|OSBL8_HUMAN	Q9BZF1	OSBL8_HUMAN	OSBPL8	Oxysterol-binding protein-related protein 8	1	1	1	0	0.0538885	-1.79088	-0.405593	0	1	-0.714196	394
sp|Q9NNW5|WDR6_HUMAN	Q9NNW5	WDR6_HUMAN	WDR6	WD repeat-containing protein 6	1	2	2	0	-0.434107	-1.35511	-0.363032	0	1.66667	-0.717415	395
sp|Q53G59|KLH12_HUMAN	Q53G59	KLH12_HUMAN	KLHL12	Kelch-like protein 12	1	1	2	0	0.40468	-1.88316	-0.697685	0	1.33333	-0.725389	396
sp|Q9NZZ3|CHMP5_HUMAN	Q9NZZ3	CHMP5_HUMAN	CHMP5	Charged multivesicular body protein 5	1	1	0	0	-1.11842	-0.366066	NA	1	0.666667	-0.742243	397
sp|Q13425|SNTB2_HUMAN	Q13425	SNTB2_HUMAN	SNTB2	Beta-2-syntrophin	1	0	1	0	-0.160209	NA	-1.33109	1	0.666667	-0.745648	398
sp|O14639|ABLM1_HUMAN	O14639	ABLM1_HUMAN	ABLIM1	Actin-binding LIM protein 1	1	2	1	0	-1.32806	-0.78884	-0.12146	0	1.33333	-0.74612	399
sp|P28289|TMOD1_HUMAN	P28289	TMOD1_HUMAN	TMOD1	Tropomodulin-1	2	3	1	0	-1.33144	-0.467749	-0.456004	0	2	-0.751732	400
sp|Q5TC82|RC3H1_HUMAN	Q5TC82	RC3H1_HUMAN	RC3H1	Roquin-1	1	2	1	0	-1.55238	-0.514362	-0.193208	0	1.33333	-0.753317	401
sp|Q9Y2D5|AKAP2_HUMAN	Q9Y2D5	AKAP2_HUMAN	AKAP2	A-kinase anchor protein 2	6	7	3	0	-0.813327	-1.13031	-0.346792	0	5.33333	-0.763477	402
sp|O60716|CTND1_HUMAN	O60716	CTND1_HUMAN	CTNND1	Catenin delta-1	4	3	1	0	-0.80235	-0.326395	-1.19935	0	2.66667	-0.77603	403
sp|Q9BRJ7|TIRR_HUMAN	Q9BRJ7	TIRR_HUMAN	NUDT16L1	Tudor-interacting repair regulator protein	5	1	4	0	0.180107	-0.723416	-1.829	0	3.33333	-0.790769	404
sp|P52565|GDIR1_HUMAN	P52565	GDIR1_HUMAN	ARHGDIA	Rho GDP-dissociation inhibitor 1	1	2	0	0	-0.431855	-1.16711	NA	1	1	-0.799482	405
sp|O95817|BAG3_HUMAN	O95817	BAG3_HUMAN	BAG3	BAG family molecular chaperone regulator 3	NA	3	1	1	NA	-0.744581	-0.87681	1	2	-0.810695	406
sp|P30622|CLIP1_HUMAN	P30622	CLIP1_HUMAN	CLIP1	CAP-Gly domain-containing linker protein 1	1	2	NA	1	0.355482	-1.9978	NA	1	1.5	-0.821158	407
sp|Q92614|MY18A_HUMAN	Q92614	MY18A_HUMAN	MYO18A	Unconventional myosin-XVIIIa	18	5	13	0	-0.42858	-1.58934	-0.458167	0	12	-0.825361	408
sp|Q5JVS0|HABP4_HUMAN	Q5JVS0	HABP4_HUMAN	HABP4	Intracellular hyaluronan-binding protein 4	NA	1	1	1	NA	-0.878663	-0.809415	1	1	-0.844039	409
sp|Q9BTE3|MCMBP_HUMAN	Q9BTE3	MCMBP_HUMAN	MCMBP	Mini-chromosome maintenance complex-binding protein	3	NA	1	1	-0.00736231	NA	-1.70724	1	2	-0.857302	410
sp|O75436|VP26A_HUMAN	O75436	VP26A_HUMAN	VPS26A	Vacuolar protein sorting-associated protein 26A	2	1	NA	1	-0.648126	-1.07791	NA	1	1.5	-0.863018	411
tr|E5RI56|E5RI56_HUMAN	E5RI56	E5RI56_HUMAN	NA	S-phase kinase-associated protein 1	2	2	4	0	-1.46365	0.327928	-1.47461	0	2.66667	-0.870111	412
sp|Q9GZM8|NDEL1_HUMAN	Q9GZM8	NDEL1_HUMAN	NDEL1	Nuclear distribution protein nudE-like 1	1	1	1	0	-1.08232	-0.553282	-1.00484	0	1	-0.880148	413
sp|O75489|NDUS3_HUMAN	O75489	NDUS3_HUMAN	NDUFS3	NADH dehydrogenase [ubiquinone] iron-sulfur protein 3, mitochondrial	3	1	2	0	-1.53299	-1.09708	-0.0994701	0	2	-0.909847	414
sp|P11413|G6PD_HUMAN	P11413	G6PD_HUMAN	G6PD	Glucose-6-phosphate 1-dehydrogenase	0	1	1	0	NA	-3.24987	1.42961	1	0.666667	-0.910132	415
sp|Q15649|ZNHI3_HUMAN	Q15649	ZNHI3_HUMAN	ZNHIT3	Zinc finger HIT domain-containing protein 3	1	2	0	0	-1.19194	-0.644277	NA	1	1	-0.918106	416
tr|A0A8Q3WKT3|A0A8Q3WKT3_HUMAN	A0A8Q3WKT3	A0A8Q3WKT3_HUMAN	RBFOX2	RNA binding protein fox-1 homolog 2	3	3	5	0	-1.67482	-0.138216	-0.950494	0	3.66667	-0.921176	417
sp|Q9UET6|TRM7_HUMAN	Q9UET6	TRM7_HUMAN	FTSJ1	Putative tRNA (cytidine(32)/guanosine(34)-2'-O)-methyltransferase	1	NA	1	1	-0.517239	NA	-1.3482	1	1	-0.932721	418
sp|Q9P0J0|NDUAD_HUMAN	Q9P0J0	NDUAD_HUMAN	NDUFA13	NADH dehydrogenase [ubiquinone] 1 alpha subcomplex subunit 13	1	0	1	0	-0.646191	NA	-1.22039	1	0.666667	-0.933292	419
sp|P49247|RPIA_HUMAN	P49247	RPIA_HUMAN	RPIA	Ribose-5-phosphate isomerase	2	2	3	0	-0.404789	-1.50108	-0.92371	0	2.33333	-0.943192	420
sp|P06396|GELS_HUMAN	P06396	GELS_HUMAN	GSN	Gelsolin	2	0	1	0	-0.641693	NA	-1.24968	1	1	-0.945687	421
sp|Q2TAY7|SMU1_HUMAN	Q2TAY7	SMU1_HUMAN	SMU1	WD40 repeat-containing protein SMU1	4	1	3	0	-0.976603	-1.00731	-0.867628	0	2.66667	-0.950514	422
tr|E9PMS6|E9PMS6_HUMAN	E9PMS6	E9PMS6_HUMAN	LMO7	LIM domain 7	1	0	1	0	-0.877579	NA	-1.03524	1	0.666667	-0.956408	423
sp|O95425|SVIL_HUMAN	O95425	SVIL_HUMAN	SVIL	Supervillin	24	6	6	0	-0.792663	-1.57805	-0.526659	0	12	-0.96579	424
sp|Q9BY89|K1671_HUMAN	Q9BY89	K1671_HUMAN	KIAA1671	Uncharacterized protein KIAA1671	9	2	2	0	-1.20445	-1.55575	-0.137536	0	4.33333	-0.965912	425
sp|P12532|KCRU_HUMAN	P12532	KCRU_HUMAN	CKMT1A	Creatine kinase U-type, mitochondrial	1	1	1	0	-0.864306	-2.22768	0.16526	0	1	-0.975577	426
sp|P49848|TAF6_HUMAN	P49848	TAF6_HUMAN	TAF6	Transcription initiation factor TFIID subunit 6	2	0	1	0	0.185172	NA	-2.16746	1	1	-0.991145	427
sp|Q96L92|SNX27_HUMAN	Q96L92	SNX27_HUMAN	SNX27	Sorting nexin-27	2	2	0	0	-0.290004	-1.71062	NA	1	1.33333	-1.00031	428
sp|Q92530|PSMF1_HUMAN	Q92530	PSMF1_HUMAN	PSMF1	Proteasome inhibitor PI31 subunit	1	1	1	0	-1.44388	-0.426123	-1.14017	0	1	-1.00339	429
sp|Q9H792|PEAK1_HUMAN	Q9H792	PEAK1_HUMAN	PEAK1	Inactive tyrosine-protein kinase PEAK1	2	2	0	0	-0.574214	-1.48506	NA	1	1.33333	-1.02964	430
sp|O15144|ARPC2_HUMAN	O15144	ARPC2_HUMAN	ARPC2	Actin-related protein 2/3 complex subunit 2	10	2	6	0	-0.719993	-1.97399	-0.467012	0	6	-1.05366	431
sp|O15116|LSM1_HUMAN	O15116	LSM1_HUMAN	LSM1	U6 snRNA-associated Sm-like protein LSm1	1	1	1	0	-0.185228	-1.29211	-1.69886	0	1	-1.05873	432
sp|Q99829|CPNE1_HUMAN	Q99829	CPNE1_HUMAN	CPNE1	Copine-1	2	0	1	0	-0.945892	NA	-1.18764	1	1	-1.06677	433
sp|Q14789|GOGB1_HUMAN	Q14789	GOGB1_HUMAN	GOLGB1	Golgin subfamily B member 1	2	11	1	0	-1.87214	-1.17271	-0.302695	0	4.66667	-1.11585	434
sp|Q6VN20|RBP10_HUMAN	Q6VN20	RBP10_HUMAN	RANBP10	Ran-binding protein 10	1	0	1	0	-0.419371	NA	-1.91199	1	0.666667	-1.16568	435
sp|Q86UK7|ZN598_HUMAN	Q86UK7	ZN598_HUMAN	ZNF598	E3 ubiquitin-protein ligase ZNF598	1	5	2	0	-1.46576	-1.24673	-0.859352	0	2.66667	-1.19061	436
sp|Q9UBX3|DIC_HUMAN	Q9UBX3	DIC_HUMAN	SLC25A10	Mitochondrial dicarboxylate carrier	1	0	1	0	-1.9602	NA	-0.504422	1	0.666667	-1.23231	437
sp|Q08380|LG3BP_HUMAN	Q08380	LG3BP_HUMAN	LGALS3BP	Galectin-3-binding protein	1	1	1	0	0.693813	-2.503	-2.00023	0	1	-1.2698	438
sp|Q5PRF9|SMAG2_HUMAN	Q5PRF9	SMAG2_HUMAN	SAMD4B	Protein Smaug homolog 2	1	1	1	0	-1.47436	-0.455009	-1.90107	0	1	-1.27681	439
sp|Q96II8|LRCH3_HUMAN	Q96II8	LRCH3_HUMAN	LRCH3	DISP complex protein LRCH3	3	2	0	0	-1.55703	-1.10714	NA	1	1.66667	-1.33208	440
sp|P11172|UMPS_HUMAN	P11172	UMPS_HUMAN	UMPS	Uridine 5'-monophosphate synthase	1	1	3	0	-2.18272	-0.934783	-0.926185	0	1.66667	-1.3479	441
sp|Q9UHD2|TBK1_HUMAN	Q9UHD2	TBK1_HUMAN	TBK1	Serine/threonine-protein kinase TBK1	1	NA	1	1	1.00567	NA	-3.84393	1	1	-1.41913	442
sp|Q14254|FLOT2_HUMAN	Q14254	FLOT2_HUMAN	FLOT2	Flotillin-2	1	NA	1	1	-1.33798	NA	-1.54044	1	1	-1.43921	443
sp|Q9H0Z9|RBM38_HUMAN	Q9H0Z9	RBM38_HUMAN	RBM38	RNA-binding protein 38	0	1	1	0	NA	-0.868592	-2.02144	1	0.666667	-1.44501	444
sp|Q658Y4|F91A1_HUMAN	Q658Y4	F91A1_HUMAN	FAM91A1	Protein FAM91A1	NA	1	2	1	NA	-0.974985	-1.93125	1	1.5	-1.45312	445
sp|Q0ZGT2|NEXN_HUMAN	Q0ZGT2	NEXN_HUMAN	NEXN	Nexilin	3	1	NA	1	-1.67205	-1.28124	NA	1	2	-1.47664	446
sp|Q9BRZ2|TRI56_HUMAN	Q9BRZ2	TRI56_HUMAN	TRIM56	E3 ubiquitin-protein ligase TRIM56	1	NA	1	1	-0.747155	NA	-2.37536	1	1	-1.56126	447
sp|O15143|ARC1B_HUMAN	O15143	ARC1B_HUMAN	ARPC1B	Actin-related protein 2/3 complex subunit 1B	2	1	2	0	-2.27459	-2.45206	0.0192276	0	1.66667	-1.56914	448
sp|O94973|AP2A2_HUMAN	O94973	AP2A2_HUMAN	AP2A2	AP-2 complex subunit alpha-2	1	NA	1	1	-0.615605	NA	-2.65008	1	1	-1.63284	449
sp|Q13867|BLMH_HUMAN	Q13867	BLMH_HUMAN	BLMH	Bleomycin hydrolase	1	1	1	0	-0.943389	-2.11679	-1.93499	0	1	-1.66506	450
sp|Q9H773|DCTP1_HUMAN	Q9H773	DCTP1_HUMAN	DCTPP1	dCTP pyrophosphatase 1	1	1	2	0	-3.68296	-1.01427	-0.522353	0	1.33333	-1.73986	451
sp|Q96PU8|QKI_HUMAN	Q96PU8	QKI_HUMAN	QKI	KH domain-containing RNA-binding protein QKI	1	0	1	0	-2.69901	NA	-1.19932	1	0.666667	-1.94916	452
sp|Q6ICG6|K0930_HUMAN	Q6ICG6	K0930_HUMAN	KIAA0930	Uncharacterized protein KIAA0930	1	0	1	0	-1.95809	NA	-2.36683	1	0.666667	-2.16246	453
sp|P35240|MERL_HUMAN	P35240	MERL_HUMAN	NF2	Merlin	2	NA	1	1	-1.5904	NA	-2.93997	1	1.5	-2.26519	454
sp|Q9UGI8|TES_HUMAN	Q9UGI8	TES_HUMAN	TES	Testin	NA	2	1	1	NA	-2.50317	-3.07562	1	1.5	-2.7894	455
sp|Q9BWF3|RBM4_HUMAN	Q9BWF3	RBM4_HUMAN	RBM4	RNA-binding protein 4	1	2	3	0	-6.23805	-0.448575	-1.69751	0	2	-2.79471	456
sp|O14936|CSKP_HUMAN	O14936	CSKP_HUMAN	CASK	Peripheral plasma membrane protein CASK	1	1	0	0	-3.11625	-3.25714	NA	1	0.666667	-3.1867	457
sp|Q15293|RCN1_HUMAN	Q15293	RCN1_HUMAN	RCN1	Reticulocalbin-1	0	2	2	0	NA	-3.59665	-4.86639	1	1.33333	-4.23152	458
sp|P04004|VTNC_HUMAN	P04004	VTNC_HUMAN	VTN	Vitronectin	0	1	1	0	NA	-5.25403	-5.25176	1	0.666667	-5.25289	459
