# Supplementary figures and images for: Target protein identification in live cells and organisms with a non-diffusive proximity tagging system
Source: eLife journal article supplement (doi:10.7554/elife.102667), 2024-10-29

**Figure 1—figure supplement 1 B**

**B**

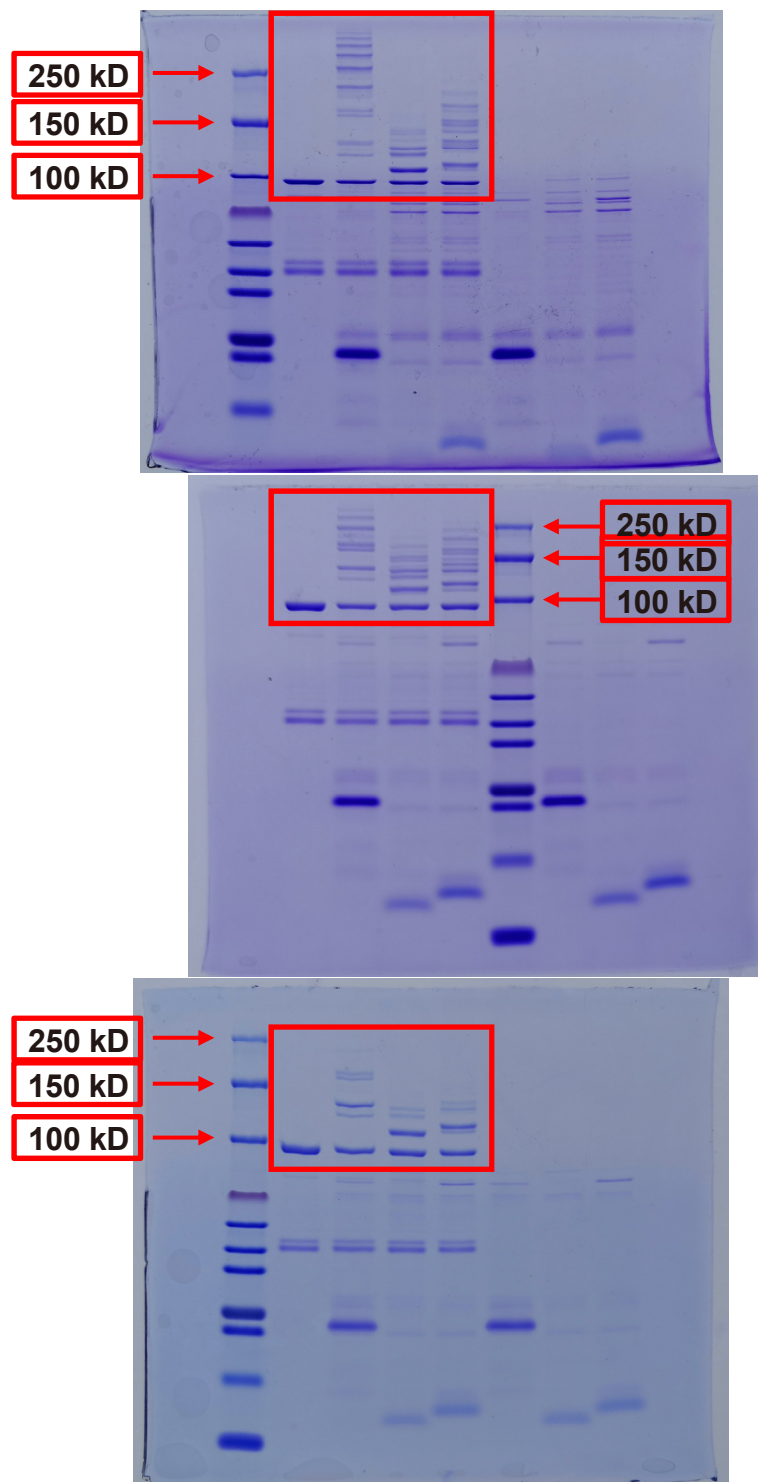

**Figure 1—figure supplement 1 C**

**C**

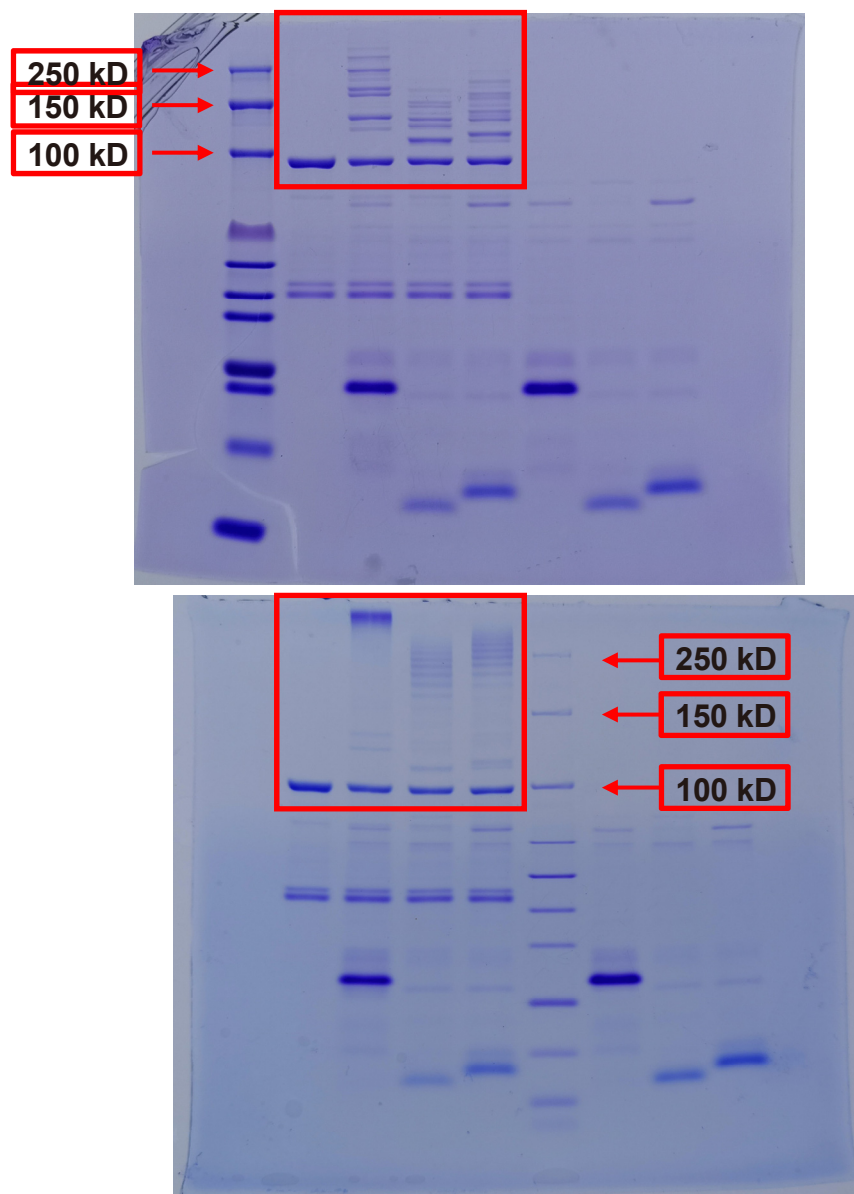

Supplement: fig1-figsupp2-data1 [file elife-102667-fig1-figsupp2-data1-v1.zip]

**Figure 2**

**B**

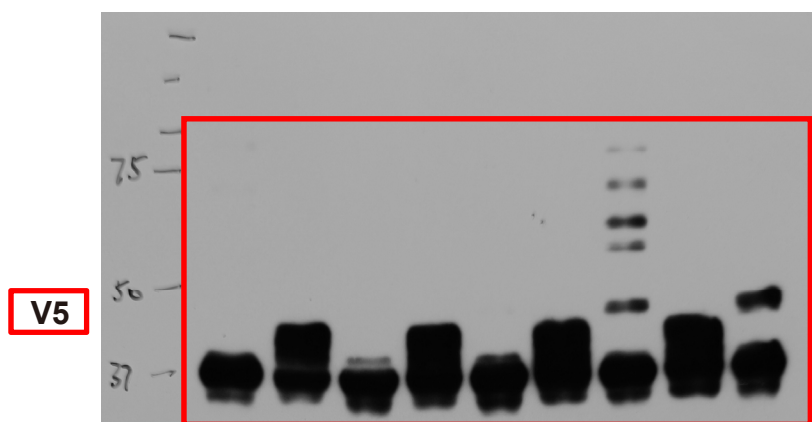

**C**

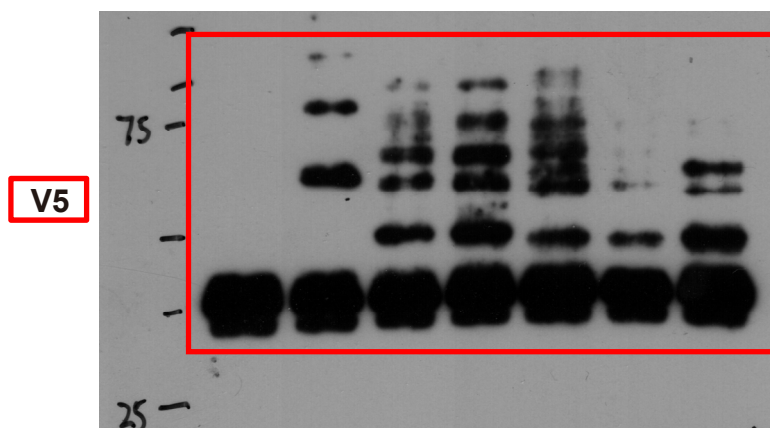

**D**

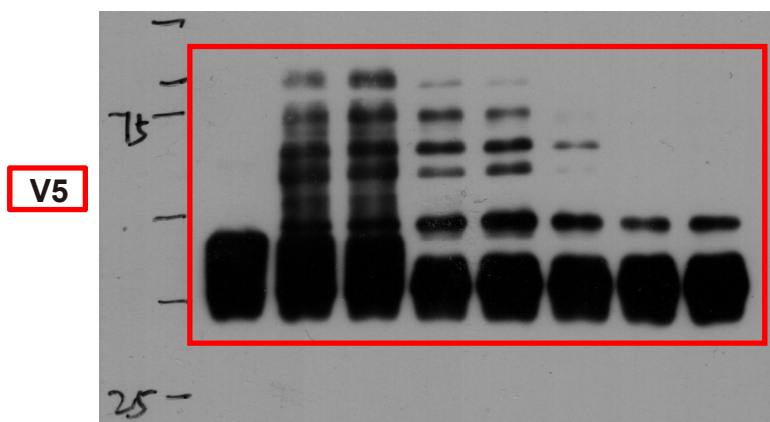

Supplement: fig2-data1 [file elife-102667-fig2-data1-v1.zip]

**Figure 2—figure supplement 3**

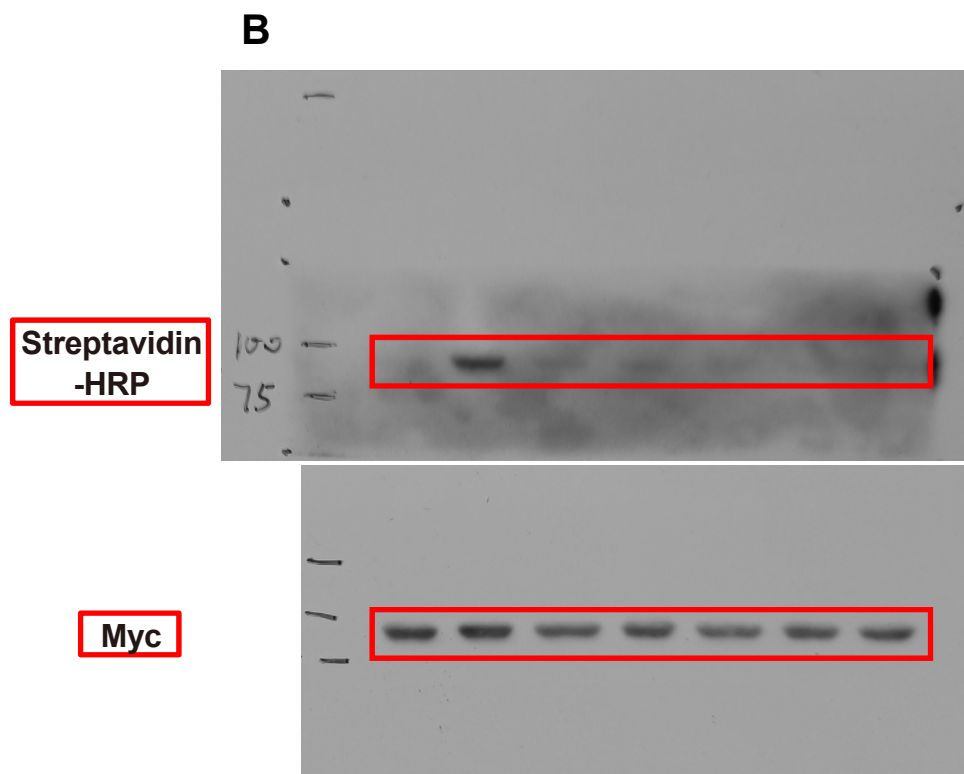

Supplement: fig2-figsupp3-data1 [file elife-102667-fig2-figsupp3-data1-v1.zip]

**Figure 2—figure supplement 4**

**A**

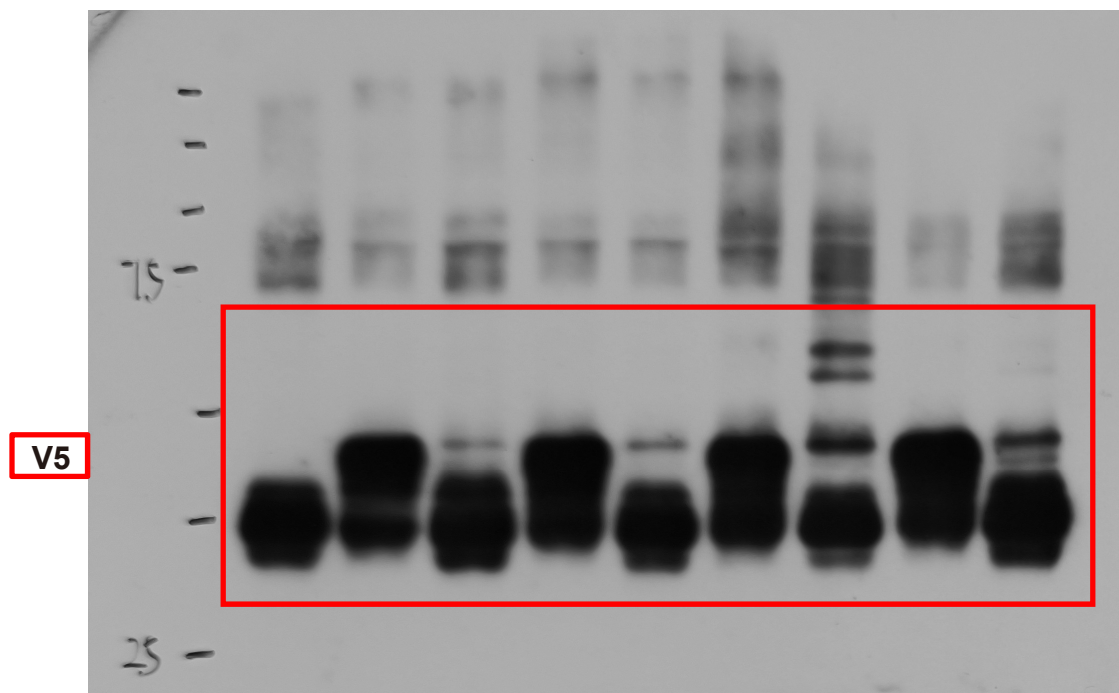

**B**

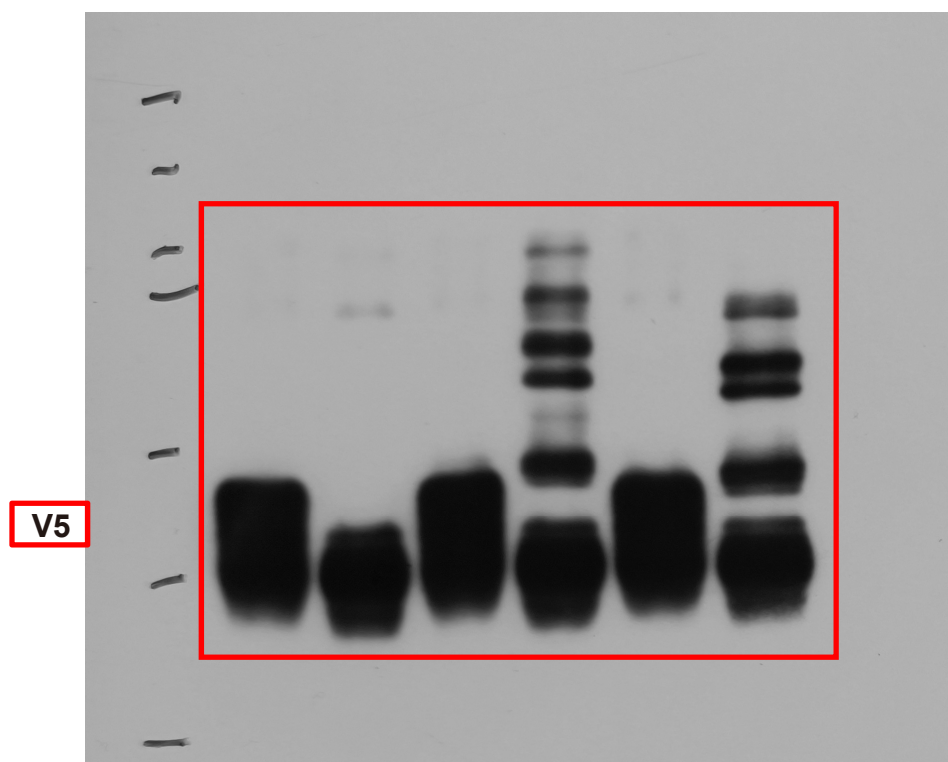

Supplement: fig2-figsupp4-data1 [file elife-102667-fig2-figsupp4-data1-v1.zip]

**Figure 3—figure supplement 1 B**

**B**

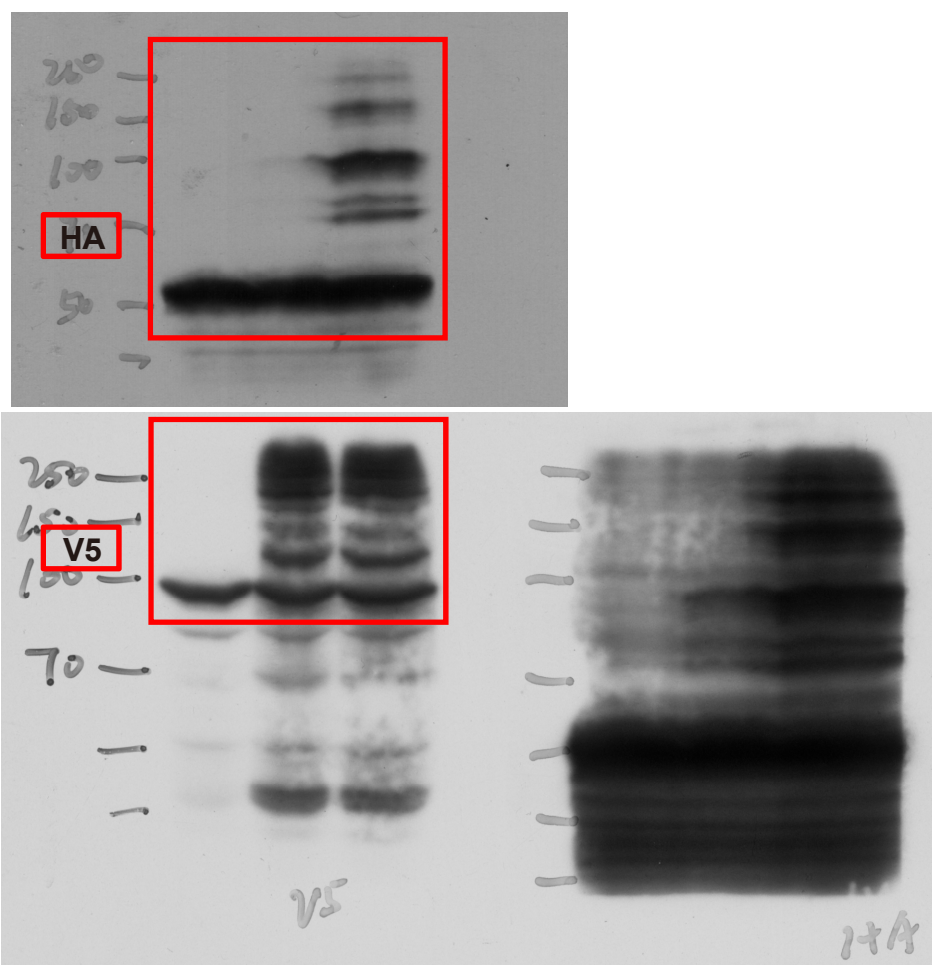

**Figure 3—figure supplement 1 C and D**

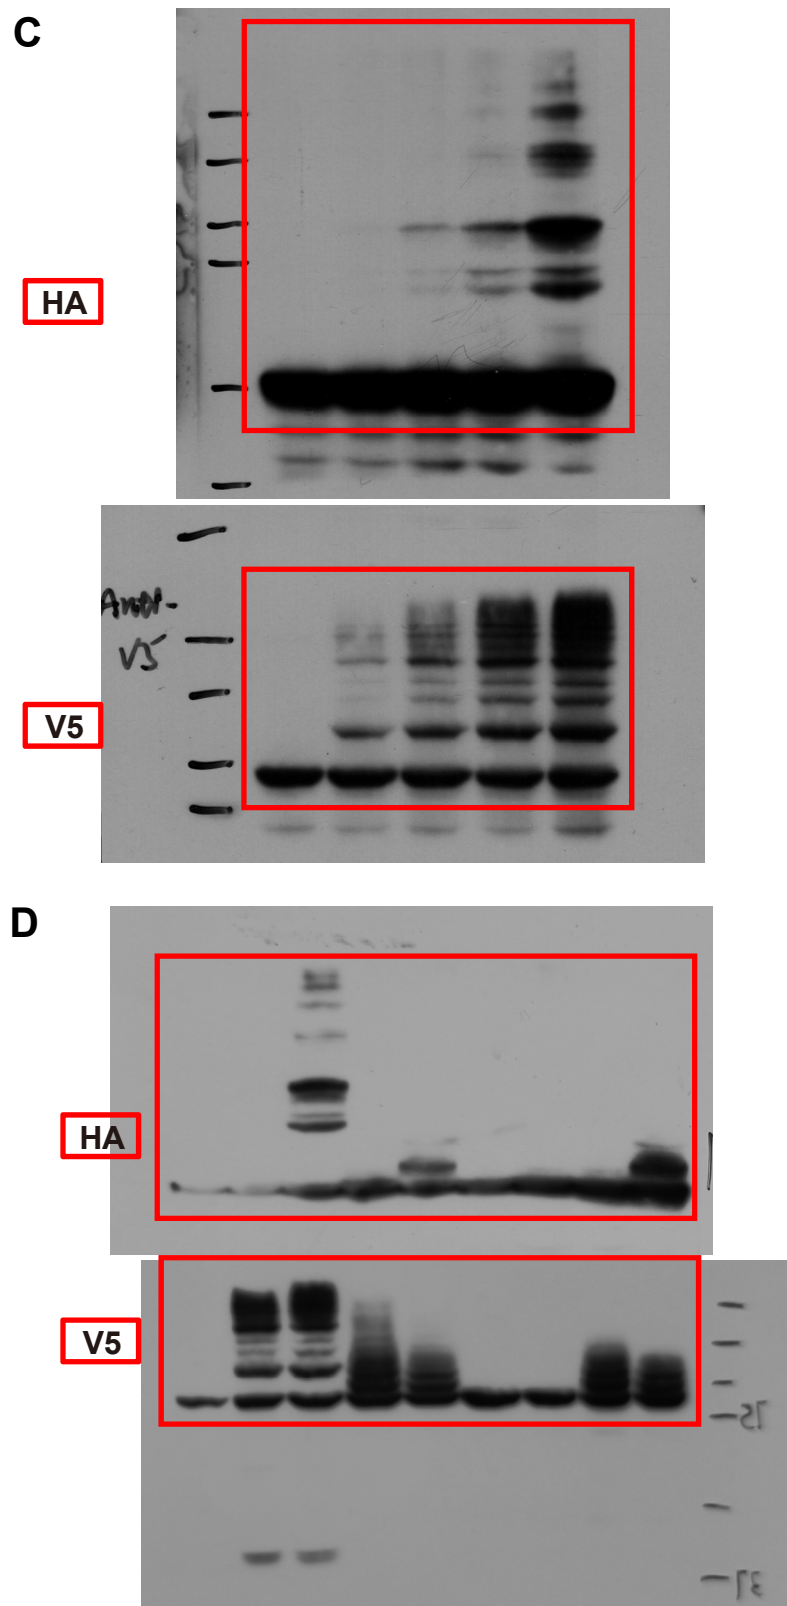

Supplement: fig3-figsupp1-data1 [file elife-102667-fig3-figsupp1-data1-v1.zip]

Figure 3—figure supplement 3

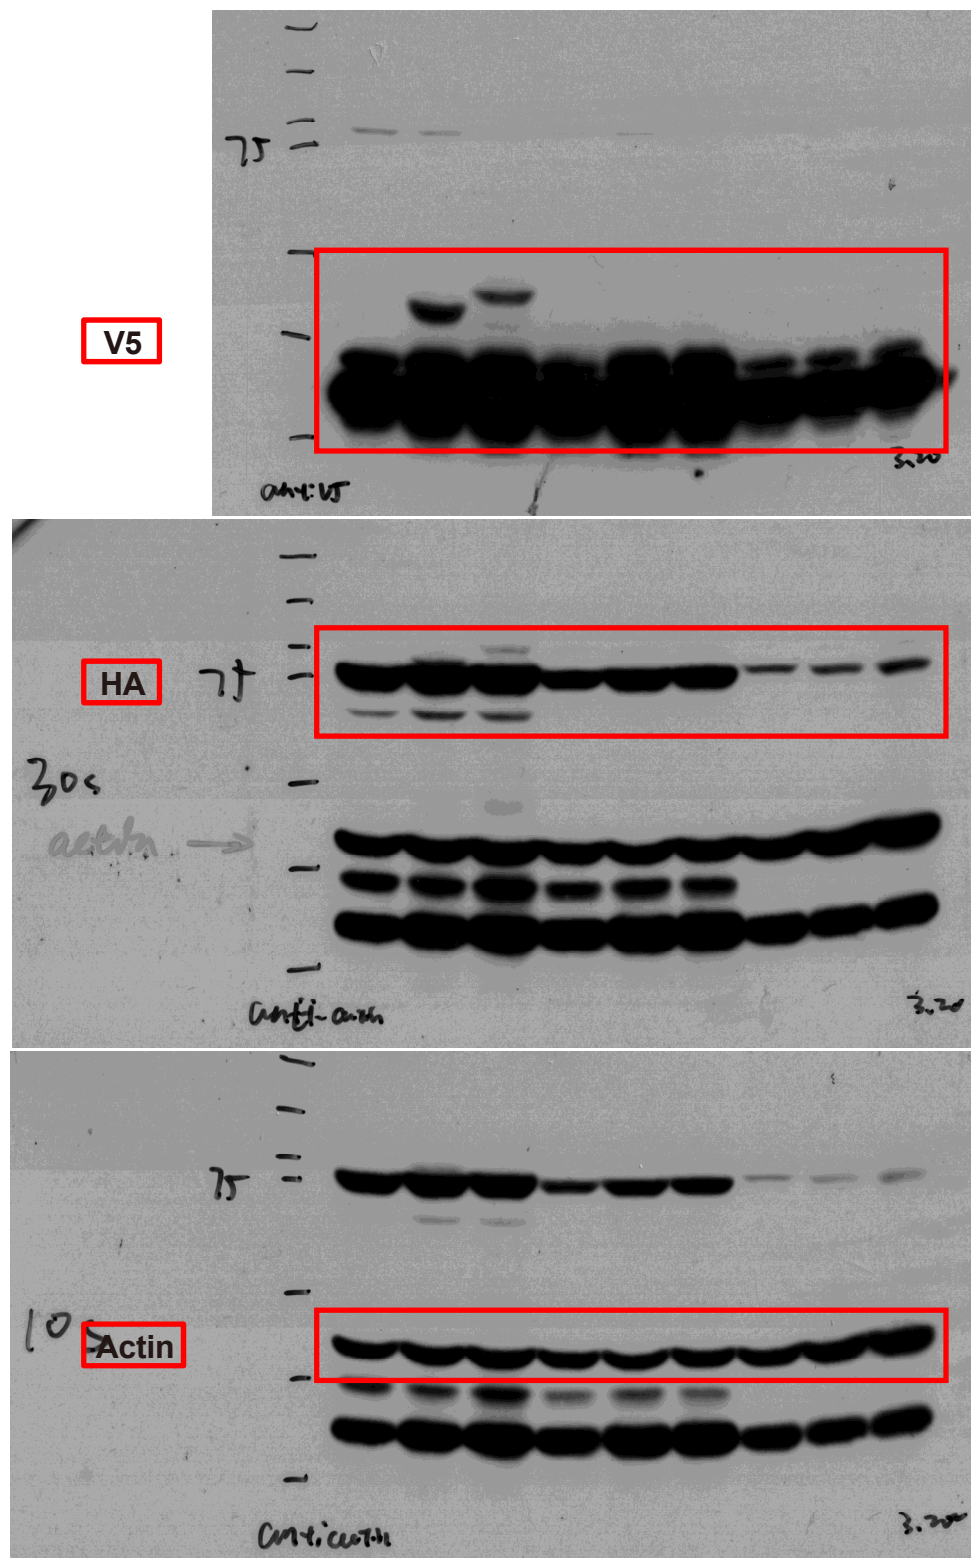

Supplement: fig3-figsupp3-data1 [file elife-102667-fig3-figsupp3-data1-v1.zip]

**Figure 4**

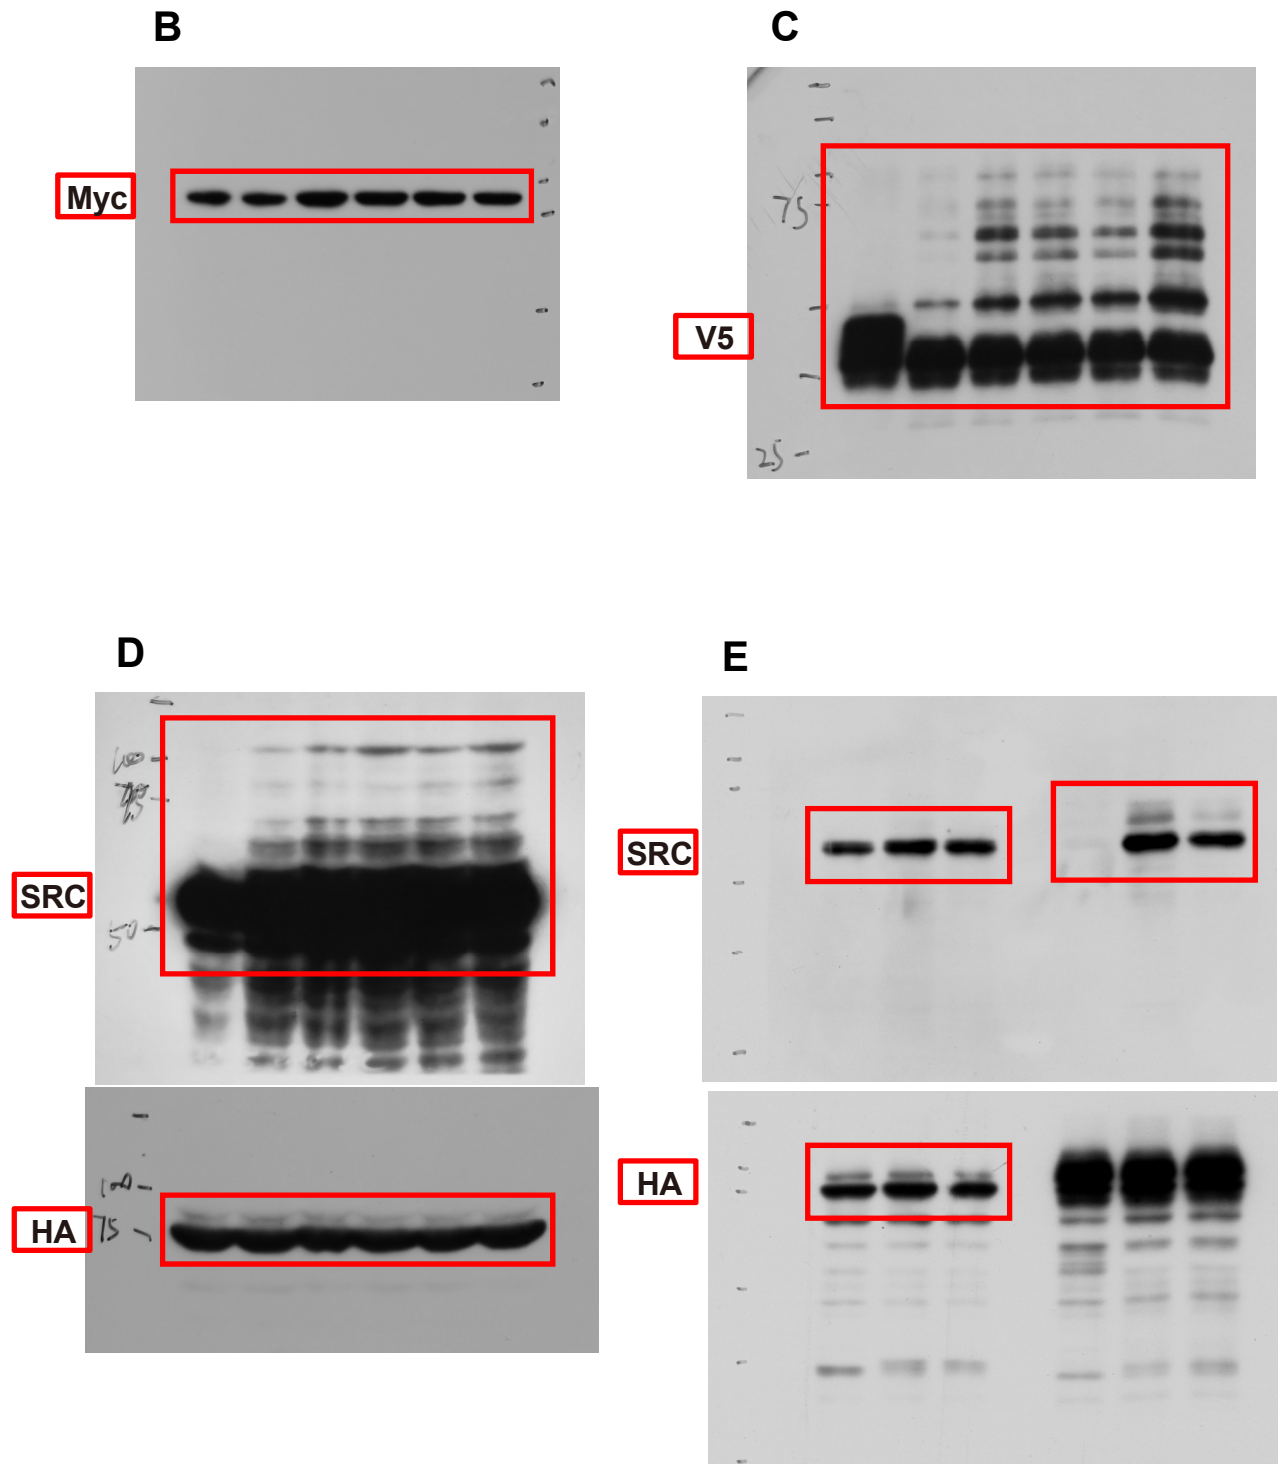

Supplement: fig4-data1 [file elife-102667-fig4-data1-v1.zip]

**Figure 6 D and E**

**D**

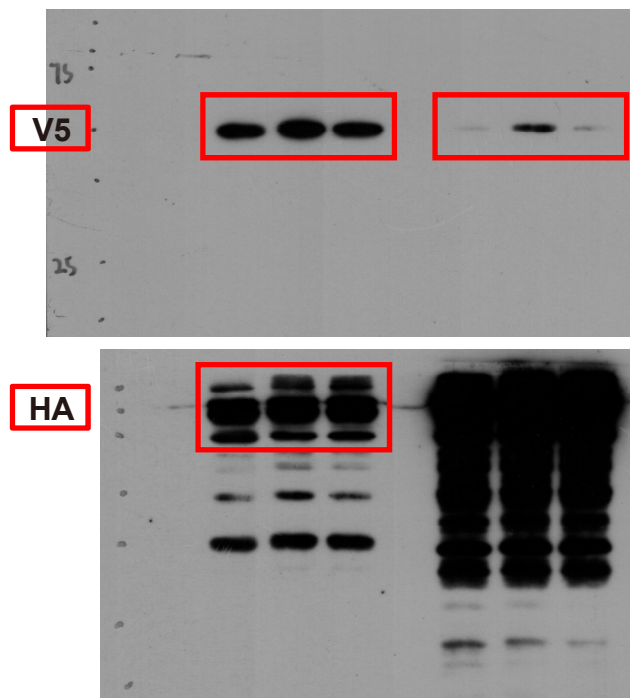

**E**

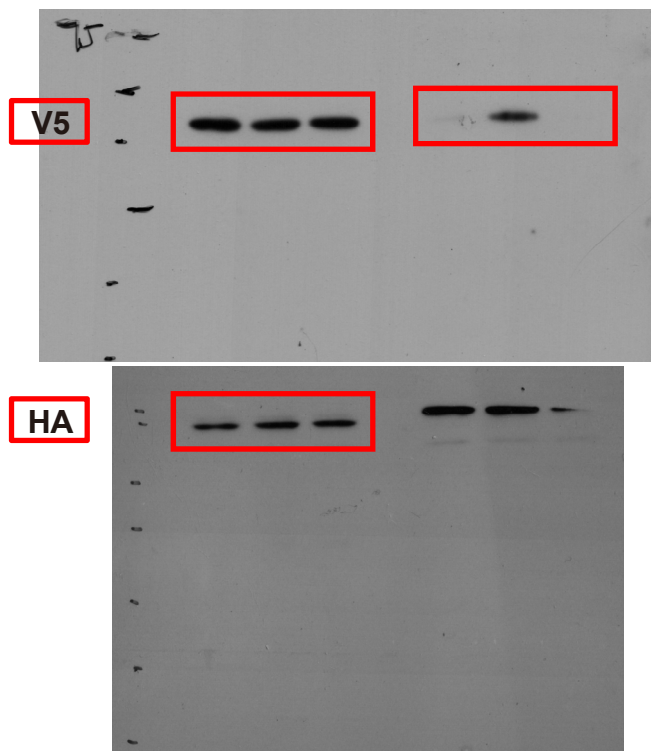

**Figure 6 F and G**

**F**

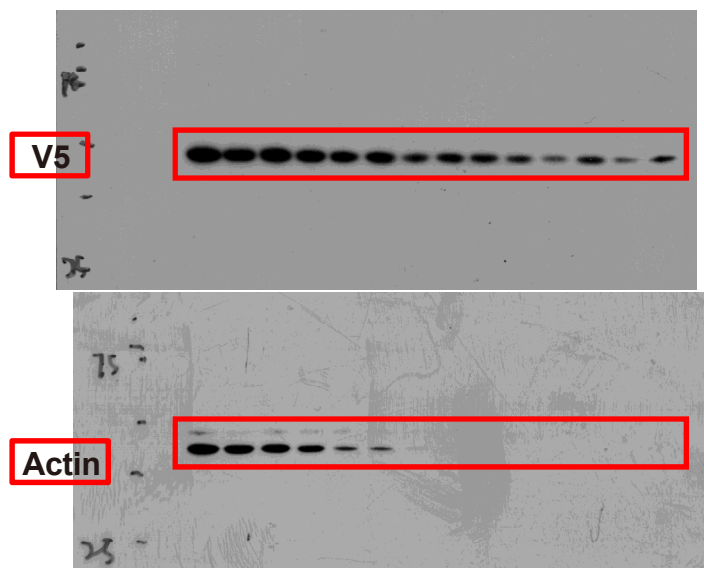

**G**

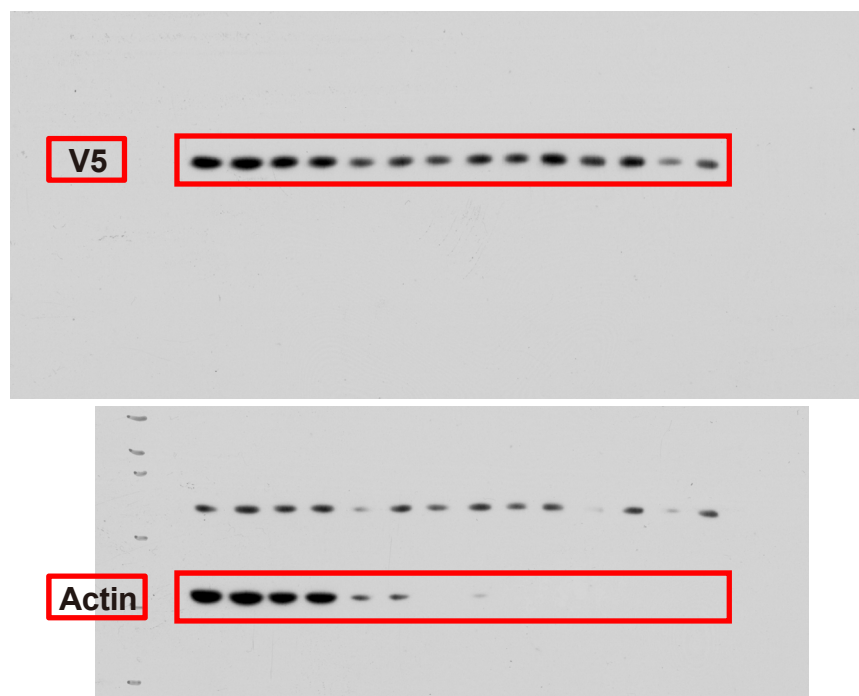

Supplement: fig6-data1 [file elife-102667-fig6-data1-v1.zip]

**Figure 6—figure supplement 1**

**B**

HEK293T

LC3

Actin

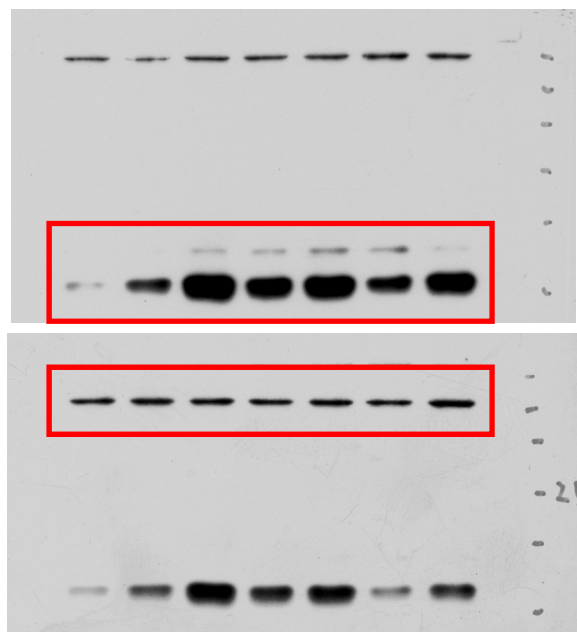

A375

LC3

Actin

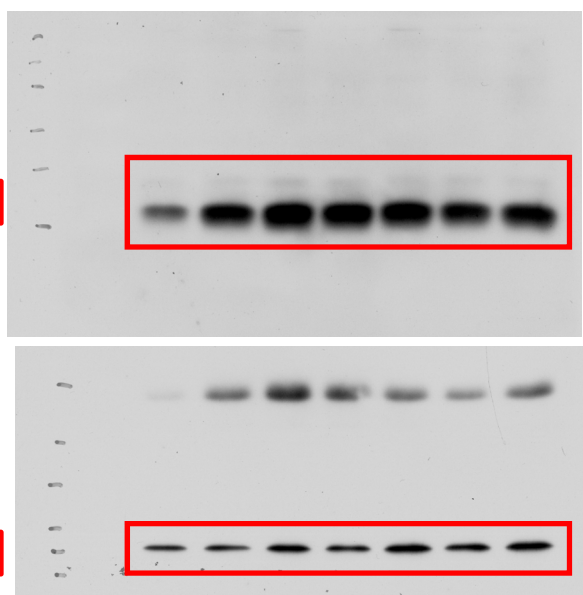

Supplement: fig6-figsupp1-data1 [file elife-102667-fig6-figsupp1-data1-v1.zip]

**Figure 7**

**C**

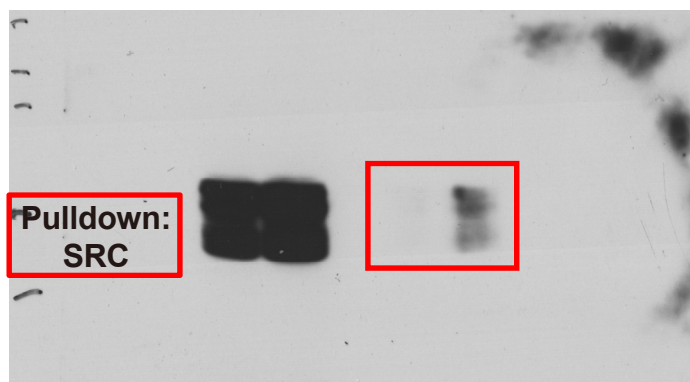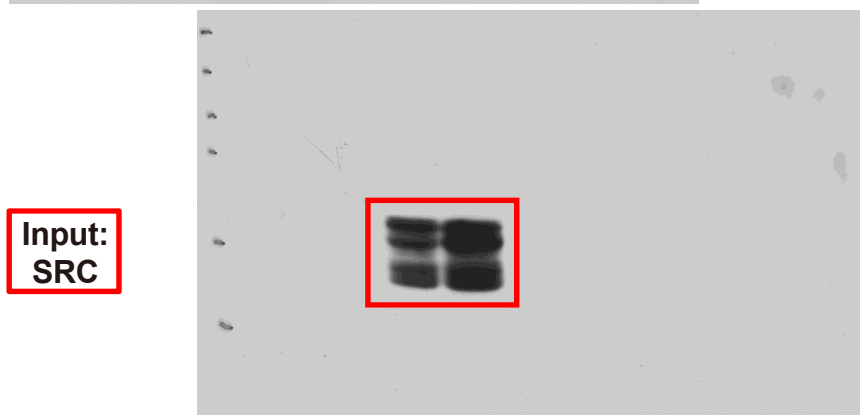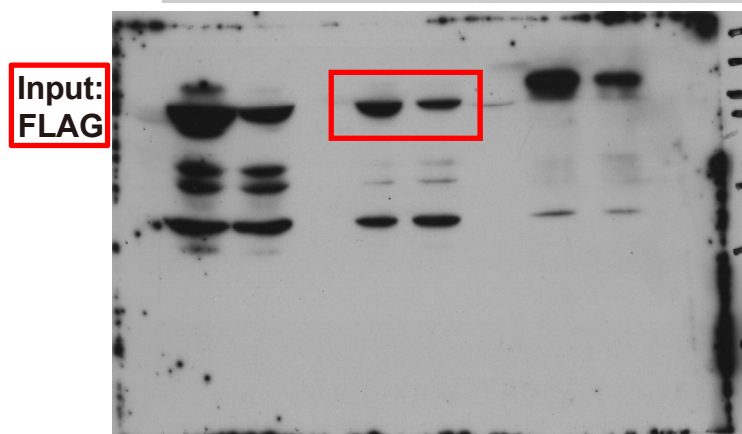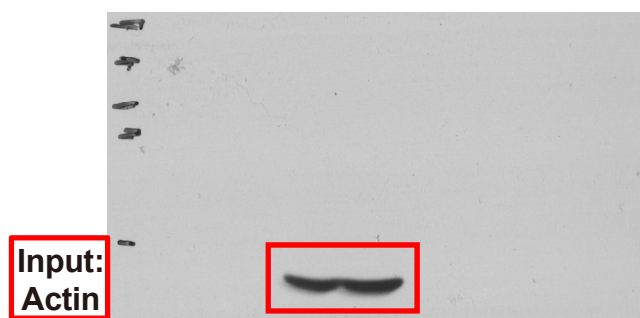

Supplement: fig7-data1 [file elife-102667-fig7-data1-v1.zip]
